# Supplementary material
Source: publisher site journal article supplement (https://www.spandidos-publications.com/4965/downloadSupplementary)
Supplement: Supplementary file 1 [file downloadSupplementary]

## Sheet: Sheet1 (2)
Table SI. RNA sequencing (Subline A and Subline B).
									group name	Subline A		Subline B		group name		Subline A			HEC1 ALDH-high→low		group name	Subline A				Subline B					Subline A		Subline B
	Subline B vs Subline A		Subline A vs Subline B						sample name	HEC1_ ALDH-high_171110	HEC1_ ALDH-high_180125	HEC1_ ALDH-high_171114	HEC1_ ALDH-high_171130	sample name	geometric mean of Subline A	HEC1_ ALDH-high_171110, HEC1_ ALDH-high_180125		geometric mean of Subline B	HEC1_ ALDH-high_171114, HEC1_ ALDH-high_171130		sample name	HEC1_ALDH-high_171110		HEC1_ALDH-high_180125		HEC1_ALDH-high_171114		HEC1_ALDH-high_171130			HEC1_ ALDH-high_171110	HEC1_ ALDH-high_180125	HEC1_ ALDH-high_171114	HEC1_ ALDH-high_171130
ID	Fold Change	P-Value	Fold Change	P-Value	ID	Symbol	EntrezGene ID	Description	ID	Processed Signal	Processed Signal	Processed Signal	Processed Signal	ID	GM	FPKM	Processed Signal	GM	FPKM	Processed Signal	ID	FPKM	Processed Signal	FPKM	Processed Signal	FPKM	Processed Signal	FPKM	Processed Signal	ID	count	count	count	count
ENPP5	-6.15564	0.293542	6.15564	0.293542	ENPP5	ENPP5	59084	ectonucleotide pyrophosphatase/phosphodiesterase 5 (putative)	ENPP5	0.0938161	1.42255	-0.129237	-3.59822	ENPP5	5.09539	5.64527	0.758181	0.827759	1.50161	-1.86373	ENPP5	3.21502	0.0938161	8.07553	1.42255	2.75447	-0.129237	0.248754	-3.59822	ENPP5	90.0423	226.17	77.144	6.9668
ALDH1A1	-5.61766	0.330497	5.61766	0.330497	ALDH1A1	ALDH1A1	216	aldehyde dehydrogenase 1 family, member A1	ALDH1A1	-1.56563	2.00479	-1.47728	-3.06349	ALDH1A1	91.9396	171.781	0.219582	16.3662	18.9021	-2.27039	ALDH1A1	26.6748	-1.56563	316.887	2.00479	28.3593	-1.47728	9.44493	-3.06349	ALDH1A1	590.278	7012.29	627.553	209.004
PLA2G7	-5.44817	0.142811	5.44817	0.142811	PLA2G7	PLA2G7	7941	phospholipase A2, group VII (platelet-activating factor acetylhydrolase, plasma)	PLA2G7	0.200848	1.86396	-0.790371	-2.03637	PLA2G7	3.50009	4.09778	1.0324	0.642433	0.703269	-1.41337	PLA2G7	1.96678	0.200848	6.22877	1.86396	0.989394	-0.790371	0.417145	-2.03637	PLA2G7	31.0146	102.339	15.6021	6.9668
ADAM23	-4.62207	0.364399	4.62207	0.364399	ADAM23	ADAM23	8745	ADAM metallopeptidase domain 23	ADAM23	-1.15052	2.63704	-1.35746	-1.57309	ADAM23	0.510998	1.01821	0.743263	0.110556	0.110865	-1.46528	ADAM23	0.13751	-1.15052	1.89891	2.63704	0.119135	-1.35746	0.102595	-1.57309	ADAM23	4.00188	55.2632	3.46714	2.98577
PTPRCAP	-4.62205	0.05229	4.62205	0.05229	PTPRCAP	PTPRCAP	5790	protein tyrosine phosphatase, receptor type, C-associated protein	PTPRCAP	0.305908	1.33859	-1.48598	-1.28659	PTPRCAP	0.599843	0.638673	0.82225	0.129778	0.130089	-1.38628	PTPRCAP	0.419376	0.305908	0.85797	1.33859	0.121113	-1.48598	0.139064	-1.28659	PTPRCAP	3.00141	6.14036	0.866786	0.995257
FAM125B	-4.43745	0.115317	4.43745	0.115317	FAM125B	FAM125B	89853	family with sequence similarity 125, member B	FAM125B	-0.303316	0.450153	-1.36941	-2.78322	FAM125B	1.04685	1.08275	0.0734181	0.235913	0.264804	-2.07631	FAM125B	0.806262	-0.303316	1.35923	0.450153	0.38508	-1.36941	0.144528	-2.78322	FAM125B	36.0169	62.427	18.2025	5.97154
COBL	-4.09701	0.362981	4.09701	0.362981	COBL	COBL	23242	cordon-bleu homolog (mouse)	COBL	-1.11964	2.20849	-0.978647	-2.00164	COBL	0.667536	1.16306	0.544427	0.162932	0.17328	-1.49015	COBL	0.21064	-1.11964	2.11548	2.20849	0.232265	-0.978647	0.114296	-2.00164	COBL	11.0052	110.526	12.135	5.97154
NUDT17	-4.07628	0.154109	4.07628	0.154109	NUDT17	NUDT17	200035	nudix (nucleoside diphosphate linked moiety X)-type motif 17	NUDT17	1.18388	1.02392	-0.0230484	-1.82366	NUDT17	0.83752	0.838807	1.1039	0.205462	0.246783	-0.923353	NUDT17	0.885262	1.18388	0.792352	1.02392	0.383486	-0.0230484	0.110081	-1.82366	NUDT17	8.00376	7.16375	3.46714	0.995257
LOC375190	-4.00283	0.0487275	4.00283	0.0487275	LOC375190				LOC375190	0.642231	1.08995	-0.734627	-1.53524	LOC375190	0.893795	0.904576	0.866089	0.223291	0.231941	-1.13493	LOC375190	0.765332	0.642231	1.04382	1.08995	0.294696	-0.734627	0.169187	-1.53524	LOC375190	9.00423	12.2807	3.46714	1.99051
IL32	-3.98533	0.0809855	3.98533	0.0809855	IL32	IL32	9235	interleukin 32	IL32	-0.790571	-0.516355	-3.23746	-2.05886	IL32	1.14931	1.1545	-0.653463	0.288384	0.312779	-2.64816	IL32	1.04511	-0.790571	1.26389	-0.516355	0.191679	-3.23746	0.433878	-2.05886	IL32	8.00376	12.2807	1.73357	2.98577
KIAA0825	-3.92213	0.185794	3.92213	0.185794	KIAA0825	KIAA0825	285600	KIAA0825	KIAA0825	1.22879	1.00127	-1.84419	0.130978	KIAA0825	0.842378	0.844998	1.11503	0.214776	0.267093	-0.856607	KIAA0825	0.911489	1.22879	0.778507	1.00127	0.108316	-1.84419	0.425871	0.130978	KIAA0825	21.0099	16.3743	7.80107	8.95731
CLEC4A	-3.61337	0.302994	3.61337	0.302994	CLEC4A	CLEC4A	50856	C-type lectin domain family 4, member A	CLEC4A	0.727918	1.41268	0.520984	-2.08708	CLEC4A	1.01187	1.04049	1.0703	0.280034	0.402433	-0.783046	CLEC4A	0.798099	0.727918	1.28289	1.41268	0.691454	0.520984	0.113412	-2.08708	CLEC4A	7.00329	11.2573	6.0675	0.995257
LCAT	-3.61247	0.173423	3.61247	0.173423	LCAT	LCAT	3931	lecithin-cholesterol acyltransferase	LCAT	0.578314	1.13456	-0.148839	-1.84426	LCAT	1.65419	1.68502	0.856438	0.457911	0.539261	-0.996548	LCAT	1.36415	0.578314	2.0059	1.13456	0.824076	-0.148839	0.254446	-1.84426	LCAT	16.0075	23.538	9.67005	2.98577
LAT	-3.58511	0.00908291	3.58511	0.00908291	LAT	LAT	27040	linker for activation of T cells	LAT	0.781781	0.966467	-0.817172	-1.11861	LAT	0.756031	0.75758	0.874124	0.210881	0.212033	-0.967892	LAT	0.709156	0.781781	0.806005	0.966467	0.234104	-0.817172	0.189962	-1.11861	LAT	9.00423	10.2339	3.46714	2.98577
PAQR6	-3.53903	0.281365	3.53903	0.281365	PAQR6	PAQR6	79957	progestin and adipoQ receptor family member VI	PAQR6	0.972268	0.751834	0.281416	-2.20402	PAQR6	3.03729	3.04616	0.862051	0.858225	1.1968	-0.961304	PAQR6	3.27842	0.972268	2.81389	0.751834	2.03094	0.281416	0.362665	-2.20402	PAQR6	57.0268	47.0761	37.2718	5.97154
SCARNA22	-3.44509	0.0524511	3.44509	0.0524511	SCARNA22	SCARNA22	677770	small Cajal body-specific RNA 22	SCARNA22	1.2817	0.992456	-0.247156	-1.04777	SCARNA22	147.964	148.708	1.13708	42.9494	44.6134	-0.647461	SCARNA22	163.566	1.2817	133.851	0.992456	56.6841	-0.247156	32.5427	-1.04777	SCARNA22	5.00235	4.09357	1.73357	0.995257
ZNF385C	-3.39914	0.0227817	3.39914	0.0227817	ZNF385C	ZNF385C	201181	zinc finger protein 385C	ZNF385C	0.916898	0.419837	-0.988555	-1.20505	ZNF385C	0.447708	0.454368	0.668368	0.131712	0.132083	-1.0968	ZNF385C	0.531876	0.916898	0.37686	0.419837	0.141975	-0.988555	0.122191	-1.20505	ZNF385C	13.0061	9.21546	3.47177	2.98798
PIP5KL1	-3.39315	0.454296	3.39315	0.454296	PIP5KL1	PIP5KL1	138429	phosphatidylinositol-4-phosphate 5-kinase-like 1	PIP5KL1	1.41527	0.752842	1.20646	-2.5636	PIP5KL1	1.81819	1.86631	1.08405	0.535841	1.06213	-0.678571	PIP5KL1	2.28741	1.41527	1.44522	0.752842	1.97918	1.20646	0.145073	-2.5636	PIP5KL1	27.0127	16.3743	21.6697	1.99051
LOC100289019	-3.32176	0.0498855	3.32176	0.0498855	LOC100289019	LOC100289019	100289019	uncharacterized LOC100289019	LOC100289019	0.501898	0.5764	-0.792497	-1.5931	LOC100289019	0.937994	0.938307	0.539149	0.282379	0.293318	-1.1928	LOC100289019	0.914085	0.501898	0.962529	0.5764	0.372679	-0.792497	0.213958	-1.5931	LOC100289019	34.016	35.8188	13.8686	7.96205
NPIPL3	-3.2683	0.0386174	3.2683	0.0386174	NPIPL3	NPIPL3	23117	nuclear pore complex interacting protein-like 3	NPIPL3	1.02426	0.694374	-0.545241	-1.15321	NPIPL3	0.459596	0.462604	0.859318	0.140622	0.143756	-0.849224	NPIPL3	0.515264	1.02426	0.409943	0.694374	0.173605	-0.545241	0.113906	-1.15321	NPIPL3	18.0085	14.3275	6.0675	3.98103
SLC7A2	-3.15067	0.265143	3.15067	0.265143	SLC7A2	SLC7A2	6542	solute carrier family 7 (cationic amino acid transporter, y+ system), member 2	SLC7A2	-0.704666	0.718407	-0.835649	-2.46193	SLC7A2	0.804178	0.903984	0.00687048	0.25524	0.296866	-1.64879	SLC7A2	0.491087	-0.704666	1.31688	0.718407	0.448465	-0.835649	0.145268	-2.46193	SLC7A2	37.0174	99.2691	33.8047	10.9478
ZNF506	-3.14352	0.0501721	3.14352	0.0501721	ZNF506	ZNF506	440515	zinc finger protein 506	ZNF506	0.217467	0.974006	-1.12697	-0.986322	ZNF506	2.24146	2.31895	0.595737	0.713042	0.713889	-1.05664	ZNF506	1.72449	0.217467	2.91341	0.974006	0.679119	-1.12697	0.748659	-0.986322	ZNF506	55.0259	92.1054	21.6697	23.8862
ENTPD3-AS1	-3.14099	0.0644602	3.14099	0.0644602	ENTPD3-AS1	ENTPD3-AS1	285266	ENTPD3 antisense RNA 1	ENTPD3-AS1	1.37571	1.28975	-0.757216	0.120249	ENTPD3-AS1	1.96818	1.96905	1.33273	0.626613	0.655811	-0.318484	ENTPD3-AS1	2.0277	1.37571	1.91041	1.28975	0.462304	-0.757216	0.849319	0.120249	ENTPD3-AS1	38.0179	35.8188	8.66786	15.9241
GPR20	-3.12915	0.211133	3.12915	0.211133	GPR20	GPR20	2843	G protein-coupled receptor 20	GPR20	0.0630007	0.38519	-2.31385	-0.529498	GPR20	0.746005	0.750661	0.224096	0.238405	0.285463	-1.42167	GPR20	0.667187	0.0630007	0.834135	0.38519	0.128453	-2.31385	0.442474	-0.529498	GPR20	9.00423	11.2573	1.73357	5.97154
FLJ38109	-3.10337	0.142729	3.10337	0.142729	FLJ38109	FLJ38109	386627	uncharacterized LOC386627	FLJ38109	0.752301	0.67537	-0.227213	-1.61279	FLJ38109	1.20305	1.20348	0.713835	0.38766	0.433222	-0.92	FLJ38109	1.23556	0.752301	1.1714	0.67537	0.626615	-0.227213	0.239829	-1.61279	FLJ38109	41.0193	38.8889	20.8029	7.96205
GPM6B	-3.09083	0.0189661	3.09083	0.0189661	GPM6B	GPM6B	2824	glycoprotein M6B	GPM6B	0.826674	0.537422	-0.770399	-1.1215	GPM6B	0.485549	0.48799	0.682048	0.157093	0.158257	-0.945948	GPM6B	0.536747	0.826674	0.439234	0.537422	0.17742	-0.770399	0.139095	-1.1215	GPM6B	10.0047	8.18714	4.33393	2.98577
LOC100288428	-3.08137	0.227631	3.08137	0.227631	LOC100288428	LOC100288428	100288428	uncharacterized LOC100288428	LOC100288428	0.640039	1.25769	-1.56689	0.217469	LOC100288428	1.24831	1.27702	0.948864	0.405115	0.48508	-0.67471	LOC100288428	1.00776	0.640039	1.54628	1.25769	0.218276	-1.56689	0.751884	0.217469	LOC100288428	20.0094	30.7018	4.33393	14.9288
CDC42EP3	-3.07485	0.176565	3.07485	0.176565	CDC42EP3	CDC42EP3	10602	CDC42 effector protein (Rho GTPase binding) 3	CDC42EP3	-0.567416	0.996988	-1.29791	-1.51355	CDC42EP3	2.04847	2.357	0.214786	0.666201	0.668062	-1.40573	CDC42EP3	1.19114	-0.567416	3.52286	0.996988	0.717898	-1.29791	0.618226	-1.51355	CDC42EP3	46.0216	136.111	27.7372	23.8862
TFAP2C	-3.03983	0.319216	3.03983	0.319216	TFAP2C	TFAP2C	7022	transcription factor AP-2 gamma (activating enhancer binding protein 2 gamma)	TFAP2C	-1.06479	1.15112	-1.04933	-2.07233	TFAP2C	1.90215	2.4912	0.0431631	0.625743	0.665485	-1.56083	TFAP2C	0.882507	-1.06479	4.09989	1.15112	0.892016	-1.04933	0.438954	-2.07233	TFAP2C	24.0113	111.55	24.27	11.9431
HCG25	-3.00831	0.056477	3.00831	0.056477	HCG25	HCG25	414765	HLA complex group 25 (non-protein coding)	HCG25	1.05398	0.982856	-0.177617	-0.963455	HCG25	0.949795	0.950084	1.01842	0.315724	0.327506	-0.570536	HCG25	0.973499	1.05398	0.926669	0.982856	0.41456	-0.177617	0.240451	-0.963455	HCG25	4.93345	4.69613	2.10089	1.21855
BEAN1	-2.99347	0.327913	2.99347	0.327913	BEAN1	BEAN1	146227	brain expressed, associated with NEDD4, 1	BEAN1	0.470116	0.398821	0.084457	-2.37916	BEAN1	1.57741	1.57789	0.434468	0.526949	0.730983	-1.14735	BEAN1	1.61687	0.470116	1.53891	0.398821	1.2376	0.084457	0.224366	-2.37916	BEAN1	39.0183	41.9591	32.9379	5.97154
SNORD10	-2.98353	0.340629	2.98353	0.340629	SNORD10	SNORD10	652966	small nucleolar RNA, C/D box 10	SNORD10	0.171407	1.05208	0.227509	-2.15806	SNORD10	95.3437	99.8194	0.611745	31.9567	43.5153	-0.965275	SNORD10	70.2647	0.171407	129.374	1.05208	73.0509	0.227509	13.9797	-2.15806	SNORD10	5.00235	9.21054	5.20072	0.995257
MAL2	-2.97856	0.155391	2.97856	0.155391	MAL2	MAL2	114569	mal, T-cell differentiation protein 2 (gene/pseudogene)	MAL2	-0.820303	0.0355003	-1.40575	-2.52828	MAL2	0.654155	0.68314	-0.392402	0.219622	0.236453	-1.96701	MAL2	0.486261	-0.820303	0.880019	0.0355003	0.324066	-1.40575	0.148839	-2.52828	MAL2	13.0061	23.538	8.66786	3.98103
ZNF790	-2.97061	0.101833	2.97061	0.101833	ZNF790	ZNF790	388536	zinc finger protein 790	ZNF790	-0.186963	0.710134	-1.61642	-1.00193	ZNF790	0.482303	0.505803	0.261586	0.162358	0.166054	-1.30917	ZNF790	0.353422	-0.186963	0.658183	0.710134	0.131215	-1.61642	0.200893	-1.00193	ZNF790	7.00329	13.3041	2.60036	3.98103
DEM1	-2.95976	0.123749	2.95976	0.123749	DEM1	DEM1	64789	defects in morphology 1 homolog (S. cerevisiae)	DEM1	-0.210801	0.869186	-1.51727	-0.955307	DEM1	1.06809	1.14379	0.329193	0.360871	0.367737	-1.23629	DEM1	0.734606	-0.210801	1.55297	0.869186	0.297008	-1.51727	0.438466	-0.955307	DEM1	15.0071	31.7252	6.0675	8.95731
LOC645431	-2.89294	0.167397	2.89294	0.167397	LOC645431				LOC645431	0.181087	1.56941	-0.851744	-0.462832	LOC645431	0.572038	0.639542	0.875247	0.197736	0.199535	-0.657288	LOC645431	0.353559	0.181087	0.925525	1.56941	0.172802	-0.851744	0.226268	-0.462832	LOC645431	6.57828	17.2202	3.21514	4.20992
CYP27B1	-2.88236	0.160284	2.88236	0.160284	CYP27B1	CYP27B1	1594	cytochrome P450, family 27, subfamily B, polypeptide 1	CYP27B1	0.391596	0.763767	-1.62269	-0.276452	CYP27B1	2.38985	2.40976	0.577681	0.829129	0.921024	-0.949571	CYP27B1	2.10065	0.391596	2.71887	0.763767	0.519988	-1.62269	1.32206	-0.276452	CYP27B1	49.023	63.4504	12.135	30.853
LOC256880	-2.86861	0.388966	2.86861	0.388966	LOC256880	LOC256880	256880	uncharacterized LOC256880	LOC256880	-0.609339	2.12378	-0.494343	-1.03192	LOC256880	0.567098	0.841109	0.757221	0.197691	0.201132	-0.76313	LOC256880	0.219929	-0.609339	1.46229	2.12378	0.238177	-0.494343	0.164087	-1.03192	LOC256880	4.00188	26.6082	4.33393	2.98577
LOC100128361	-2.86732	0.135495	2.86732	0.135495	LOC100128361	LOC100128361	100128361	uncharacterized LOC100128361	LOC100128361	1.54639	0.478361	-0.183036	-0.831618	LOC100128361	0.770136	0.8235	1.01238	0.268591	0.275405	-0.507327	LOC100128361	1.11512	1.54639	0.531879	0.478361	0.336289	-0.183036	0.214521	-0.831618	LOC100128361	26.0122	12.4071	7.84456	5.00409
AKR7A2P1	-2.85651	0.235142	2.85651	0.235142	AKR7A2P1	AKR7A2P1	246182	aldo-keto reductase family 7, member A2 pseudogene 1	AKR7A2P1	0.821087	0.716265	0.154723	-1.64588	AKR7A2P1	0.92871	0.929323	0.768676	0.32512	0.390507	-0.74558	AKR7A2P1	0.963069	0.821087	0.895577	0.716265	0.606823	0.154723	0.174191	-1.64588	AKR7A2P1	11.0052	10.2339	6.93429	1.99051
CACNB2	-2.85621	0.0121956	2.85621	0.0121956	CACNB2	CACNB2	783	calcium channel, voltage-dependent, beta 2 subunit	CACNB2	0.867814	0.848026	-0.824649	-0.487719	CACNB2	0.723323	0.723341	0.85792	0.253245	0.254974	-0.656184	CACNB2	0.728301	0.867814	0.71838	0.848026	0.225335	-0.824649	0.284613	-0.487719	CACNB2	28.0132	27.6316	8.66786	10.9478
LOC254896	-2.82365	0.224188	2.82365	0.224188	LOC254896	LOC254896	254896	uncharacterized LOC254896	LOC254896	1.83107	0.485245	0.198093	-0.8769	LOC254896	0.771272	0.856701	1.15816	0.273147	0.292324	-0.339403	LOC254896	1.22963	1.83107	0.483772	0.485245	0.39646	0.198093	0.188189	-0.8769	LOC254896	13.0061	5.11697	4.19344	1.99051
SNX22	-2.81357	0.165161	2.81357	0.165161	SNX22	SNX22	79856	sorting nexin 22	SNX22	0.779895	0.542299	-1.51695	-0.145663	SNX22	0.511036	0.512769	0.661097	0.181632	0.202534	-0.831307	SNX22	0.554898	0.779895	0.470641	0.542299	0.112926	-1.51695	0.292141	-0.145663	SNX22	19.3539	16.4152	3.93867	10.1894
ANKRD36	-2.80063	0.050405	2.80063	0.050405	ANKRD36	ANKRD36	375248	ankyrin repeat domain 36	ANKRD36	0.51728	0.350839	-0.715007	-1.38838	ANKRD36	4.36761	4.37488	0.43406	1.55951	1.60217	-1.05169	ANKRD36	4.62696	0.51728	4.1228	0.350839	1.96943	-0.715007	1.23491	-1.38838	ANKRD36	287.135	255.848	122.217	76.6348
KANSL1-AS1	-2.76943	0.510036	2.76943	0.510036	KANSL1-AS1	KANSL1-AS1	644246	KANSL1 antisense RNA 1	KANSL1-AS1	1.13128	-0.058337	0.817456	-2.6837	KANSL1-AS1	2.88555	3.13429	0.536471	1.04193	1.90783	-0.933119	KANSL1-AS1	4.35797	1.13128	1.91062	-0.058337	3.50602	0.817456	0.309644	-2.6837	KANSL1-AS1	14.0074	6.1411	11.269	0.995257
TRIM17	-2.75967	0.180722	2.75967	0.180722	TRIM17	TRIM17	51127	tripartite motif containing 17	TRIM17	0.59151	1.36955	0.127546	-1.09548	TRIM17	0.520713	0.539759	0.980529	0.188686	0.205892	-0.483969	TRIM17	0.397642	0.59151	0.681875	1.36955	0.288287	0.127546	0.123497	-1.09548	TRIM17	7.00329	12.2807	5.20072	1.99051
DHRS3	-2.74993	0.494253	2.74993	0.494253	DHRS3	DHRS3	9249	dehydrogenase/reductase (SDR family) member 3	DHRS3	0.716701	0.22032	0.751784	-2.73355	DHRS3	39.7412	40.3308	0.46851	14.4518	26.3408	-0.990882	DHRS3	47.2013	0.716701	33.4602	0.22032	48.3632	0.751784	4.31843	-2.73355	DHRS3	772.363	547.515	791.376	70.6632
F2RL2	-2.73451	0.280531	2.73451	0.280531	F2RL2	F2RL2	2151	coagulation factor II (thrombin) receptor-like 2	F2RL2	0.0222826	2.00253	-0.407058	-0.470702	F2RL2	0.442486	0.550848	1.0124	0.161815	0.161855	-0.43888	F2RL2	0.222763	0.0222826	0.878933	2.00253	0.165424	-0.407058	0.158285	-0.470702	F2RL2	7.00329	27.6316	5.20072	4.97628
CCDC65	-2.73445	0.203252	2.73445	0.203252	CCDC65	CCDC65	85478	coiled-coil domain containing 65	CCDC65	0.556914	0.227026	-1.81994	-0.298622	CCDC65	0.488075	0.491268	0.39197	0.178491	0.20388	-1.05928	CCDC65	0.547192	0.556914	0.435345	0.227026	0.10535	-1.81994	0.302411	-0.298622	CCDC65	9.00423	7.16375	1.73357	4.97628
SAPCD1	-2.71149	0.381201	2.71149	0.381201	SAPCD1	SAPCD1	401251	suppressor APC domain containing 1	SAPCD1	0.35585	1.11511	0.531154	-1.93837	SAPCD1	5.41431	5.60284	0.735481	1.9968	2.77389	-0.703607	SAPCD1	4.16162	0.35585	7.04406	1.11511	4.69931	0.531154	0.848465	-1.93837	SAPCD1	29.9971	50.7739	33.8728	6.11578
ZNF234	-2.70728	0.257672	2.70728	0.257672	ZNF234	ZNF234	10780	zinc finger protein 234	ZNF234	-0.789804	0.799424	-1.88984	-0.974229	ZNF234	2.06187	2.3826	0.00481036	0.761601	0.800269	-1.43203	ZNF234	1.18866	-0.789804	3.57654	0.799424	0.554517	-1.88984	1.04602	-0.974229	ZNF234	52.0245	159.649	24.27	45.7818
NOV	-2.70404	0.377825	2.70404	0.377825	NOV	NOV	4856	nephroblastoma overexpressed	NOV	-0.371253	0.801156	-0.0857846	-2.35454	NOV	3.61639	3.91905	0.214951	1.3374	1.77257	-1.22016	NOV	2.40885	-0.371253	5.42925	0.801156	2.93592	-0.0857846	0.609229	-2.35454	NOV	59.0278	133.041	71.9432	14.9288
LOC440910	-2.69314	0.12579	2.69314	0.12579	LOC440910	LOC440910	440910	uncharacterized LOC440910	LOC440910	1.31431	0.20949	-0.767089	-0.567692	LOC440910	0.478674	0.514195	0.761901	0.177738	0.178163	-0.66739	LOC440910	0.701992	1.31431	0.326398	0.20949	0.16587	-0.767089	0.190455	-0.567692	LOC440910	11.0052	5.11697	2.60036	2.98577
ZNF155	-2.68569	0.272256	2.68569	0.272256	ZNF155	ZNF155	7711	zinc finger protein 155	ZNF155	-0.401932	0.523599	-2.19392	-0.535005	ZNF155	0.676618	0.711726	0.0608333	0.251934	0.294733	-1.36446	ZNF155	0.49095	-0.401932	0.932502	0.523599	0.141774	-2.19392	0.447691	-0.535005	ZNF155	12.0056	23.538	3.46714	10.9478
WDR88	-2.68439	0.104871	2.68439	0.104871	WDR88	WDR88	126248	WD repeat domain 88	WDR88	0.535072	1.33329	-0.186431	-0.794395	WDR88	0.851008	0.88378	0.934183	0.317021	0.324084	-0.490413	WDR88	0.645341	0.535072	1.12222	1.33329	0.391377	-0.186431	0.256791	-0.794395	WDR88	10.0047	17.3977	6.0675	3.98103
CDKN2A	-2.66944	0.326614	2.66944	0.326614	CDKN2A	CDKN2A	1029	cyclin-dependent kinase inhibitor 2A	CDKN2A	-0.172686	1.3661	-0.0341313	-1.60553	CDKN2A	16.6022	19.0196	0.596708	6.21934	7.16468	-0.819831	CDKN2A	9.7399	-0.172686	28.2993	1.3661	10.7217	-0.0341313	3.60766	-1.60553	CDKN2A	94.0442	273.246	104.014	34.834
FGF18	-2.66855	0.58493	2.66855	0.58493	FGF18	FGF18	8817	fibroblast growth factor 18	FGF18	-2.6042	1.76833	-1.6412	-2.02677	FGF18	1.00265	2.3918	-0.417932	0.375727	0.379086	-1.83399	FGF18	0.220301	-2.6042	4.5633	1.76833	0.429444	-1.6412	0.328729	-2.02677	FGF18	4.00188	82.8948	7.80107	5.97154
FAM166A	-2.66521	0.0402496	2.66521	0.0402496	FAM166A	FAM166A	401565	family with sequence similarity 166, member A	FAM166A	1.06178	0.509825	-0.725787	-0.531108	FAM166A	0.564979	0.575348	0.785802	0.211983	0.212466	-0.628448	FAM166A	0.684084	1.06178	0.466611	0.509825	0.198152	-0.725787	0.226779	-0.531108	FAM166A	6.41607	4.37638	1.85848	2.12698
DKKL1	-2.65955	0.10016	2.65955	0.10016	DKKL1	DKKL1	27120	dickkopf-like 1	DKKL1	0.791986	-0.175289	-1.09306	-1.11261	DKKL1	1.42613	1.50702	0.308349	0.53623	0.536242	-1.10284	DKKL1	1.99411	0.791986	1.01993	-0.175289	0.539874	-1.09306	0.53261	-1.11261	DKKL1	16.0075	8.18714	4.33393	3.98103
TMEM86B	-2.64009	0.0977709	2.64009	0.0977709	TMEM86B	TMEM86B	255043	transmembrane protein 86B	TMEM86B	0.299757	0.171972	-0.69567	-1.63378	TMEM86B	1.15098	1.15211	0.235864	0.435963	0.459208	-1.16472	TMEM86B	1.2031	0.299757	1.10112	0.171972	0.60346	-0.69567	0.314956	-1.63378	TMEM86B	19.0089	17.3977	9.53465	4.97628
MGC12982	-2.63499	0.440771	2.63499	0.440771	MGC12982				MGC12982	-0.433327	1.12987	0.189812	-2.28886	MGC12982	1.31498	1.51273	0.348271	0.499047	0.69479	-1.04952	MGC12982	0.764954	-0.433327	2.2605	1.12987	1.1782	0.189812	0.21138	-2.28886	MGC12982	18.0085	53.2164	27.7372	4.97628
YJEFN3	-2.62107	0.161514	2.62107	0.161514	YJEFN3	YJEFN3	374887	YjeF N-terminal domain containing 3	YJEFN3	0.94627	1.15775	0.291876	-0.968171	YJEFN3	2.34005	2.34633	1.05201	0.892782	0.979272	-0.338147	YJEFN3	2.17467	0.94627	2.518	1.15775	1.38166	0.291876	0.576885	-0.968171	YJEFN3	15.0071	19.4445	9.53465	3.98103
ZSCAN23	-2.60424	0.164915	2.60424	0.164915	ZSCAN23	ZSCAN23	222696	zinc finger and SCAN domain containing 23	ZSCAN23	0.57194	0.604622	-0.149562	-1.43559	ZSCAN23	0.669241	0.669284	0.588281	0.256982	0.282932	-0.792579	ZSCAN23	0.661703	0.57194	0.676864	0.604622	0.4013	-0.149562	0.164564	-1.43559	ZSCAN23	20.0094	20.4679	12.135	4.97628
SNAI3	-2.60423	0.0894564	2.60423	0.0894564	SNAI3	SNAI3	333929	snail homolog 3 (Drosophila)	SNAI3	0.507397	-0.137991	-0.892179	-1.50013	SNAI3	0.830535	0.851398	0.184703	0.318918	0.326023	-1.19615	SNAI3	1.03872	0.507397	0.664075	-0.137991	0.393717	-0.892179	0.258329	-1.50013	SNAI3	16.0075	10.2339	6.0675	3.98105
LOC285033	-2.60243	0.242589	2.60243	0.242589	LOC285033	LOC285033	285033	uncharacterized LOC285033	LOC285033	-0.0410449	0.668018	-1.82913	-0.303615	LOC285033	2.69962	2.78155	0.313487	1.03735	1.18574	-1.06637	LOC285033	2.11144	-0.0410449	3.45166	0.668018	0.611381	-1.82913	1.7601	-0.303615	LOC285033	24.4192	48.3897	14.2428	16.1591
ZNF285	-2.59336	0.0048435	2.59336	0.0048435	ZNF285	ZNF285	26974	zinc finger protein 285	ZNF285	0.456263	0.308372	-0.931234	-1.05377	ZNF285	1.27355	1.27523	0.382318	0.491083	0.491525	-0.992502	ZNF285	1.34053	0.456263	1.20992	0.308372	0.512387	-0.931234	0.470664	-1.05377	ZNF285	34.016	30.7018	13.0018	11.9431
KCNJ11	-2.5894	0.00769623	2.5894	0.00769623	KCNJ11	KCNJ11	3767	potassium inwardly-rectifying channel, subfamily J, member 11	KCNJ11	0.811533	1.02063	-0.395392	-0.517683	KCNJ11	0.327952	0.328814	0.916083	0.126652	0.126766	-0.456538	KCNJ11	0.305027	0.811533	0.352601	1.02063	0.132135	-0.395392	0.121396	-0.517683	KCNJ11	10.0047	10.2339	4.33393	3.98103
LOC400752	-2.57148	0.144783	2.57148	0.144783	LOC400752	LOC400752	400752	uncharacterized LOC400752	LOC400752	0.321759	0.884954	-0.247742	-1.27074	LOC400752	0.711636	0.725235	0.603357	0.276741	0.294318	-0.759243	LOC400752	0.585448	0.321759	0.865022	0.884954	0.394504	-0.247742	0.194132	-1.27074	LOC400752	9.00423	13.3041	6.0675	2.98577
AMOT	-2.56609	0.122677	2.56609	0.122677	AMOT	AMOT	154796	angiomotin	AMOT	0.531485	1.57613	-0.244789	-0.366744	AMOT	1.36074	1.4509	1.05381	0.530276	0.530749	-0.305766	AMOT	0.947413	0.531485	1.95438	1.57613	0.553169	-0.244789	0.50833	-0.366744	AMOT	63.0296	134.064	38.1386	33.8387
LRRC29	-2.54676	0.397165	2.54676	0.397165	LRRC29	LRRC29	26231	leucine rich repeat containing 29	LRRC29	1.19928	0.165445	0.48517	-1.81778	LRRC29	2.61674	2.78652	0.68236	1.02748	1.37249	-0.666302	LRRC29	3.74428	1.19928	1.82875	0.165445	2.28245	0.48517	0.462536	-1.81778	LRRC29	42.0198	23.538	29.4707	5.97154
MIR600HG	-2.52134	0.188591	2.52134	0.188591	MIR600HG	MIR600HG	81571	MIR600 host gene (non-protein coding)	MIR600HG	0.426513	0.599373	-0.1472	-1.49529	MIR600HG	0.879981	0.881561	0.512943	0.349014	0.387804	-0.821246	MIR600HG	0.828811	0.426513	0.934311	0.599373	0.556866	-0.1472	0.218743	-1.49529	MIR600HG	49.023	55.2632	32.9379	12.9383
CCDC149	-2.51113	0.0550388	2.51113	0.0550388	CCDC149	CCDC149	91050	coiled-coil domain containing 149	CCDC149	-0.282789	-0.0694997	-1.81171	-1.19725	CCDC149	0.420434	0.421583	-0.176144	0.167428	0.171239	-1.50448	CCDC149	0.390476	-0.282789	0.45269	-0.0694997	0.135314	-1.81171	0.207164	-1.19725	CCDC149	15.0071	17.3977	5.20072	7.96205
PILRA	-2.50232	0.410386	2.50232	0.410386	PILRA	PILRA	29992	paired immunoglobin-like type 2 receptor alpha	PILRA	1.2228	0.701534	0.893879	-1.61608	PILRA	2.09706	2.13137	0.962165	0.838046	1.17563	-0.3611	PILRA	2.51228	1.2228	1.75046	0.701534	2.00011	0.893879	0.351141	-1.61608	PILRA	24.0113	18.4211	18.2025	3.98103
SNORD76	-2.4962	0.160152	2.4962	0.160152	SNORD76	SNORD76	692196	small nucleolar RNA, C/D box 76	SNORD76	1.58873	0.399021	-0.425555	-0.226159	SNORD76	6364.07	6912.76	0.993876	2549.5	2555.59	-0.325857	SNORD76	9611.79	1.58873	4213.72	0.399021	2379.27	-0.425555	2731.92	-0.226159	SNORD76	7.00329	3.07018	1.73357	1.99051
MAP3K10	-2.49337	0.126135	2.49337	0.126135	MAP3K10	MAP3K10	4294	mitogen-activated protein kinase kinase kinase 10	MAP3K10	0.241025	0.41121	-0.480478	-1.50348	MAP3K10	0.642106	0.643223	0.326118	0.257525	0.273881	-0.99198	MAP3K10	0.605329	0.241025	0.681118	0.41121	0.367111	-0.480478	0.180652	-1.50348	MAP3K10	20.0094	22.5146	12.135	5.97154
AKNA	-2.49137	0.259637	2.49137	0.259637	AKNA	AKNA	80709	AT-hook transcription factor	AKNA	0.789574	0.887845	0.365832	-1.3223	AKNA	0.605791	0.606142	0.838709	0.243155	0.285971	-0.478232	AKNA	0.585506	0.789574	0.626778	0.887845	0.436488	0.365832	0.135455	-1.3223	AKNA	43.0202	46.0527	32.0711	9.95257
APP	-2.47664	0.481938	2.47664	0.481938	APP	APP	351	amyloid beta (A4) precursor protein	APP	0.45553	0.402496	0.647891	-2.40663	APP	74.69	74.7026	0.429013	30.1578	48.6945	-0.879371	APP	76.0755	0.45553	73.3297	0.402496	86.9263	0.647891	10.4628	-2.40663	APP	2645.24	2549.27	2988.68	360.283
SESN3	-2.47404	0.261049	2.47404	0.261049	SESN3	SESN3	143686	sestrin 3	SESN3	0.4777	0.510384	-1.65524	0.0295846	SESN3	1.05538	1.05544	0.494042	0.426581	0.501394	-0.812825	SESN3	1.04349	0.4777	1.0674	0.510384	0.237909	-1.65524	0.764878	0.0295846	SESN3	19.0089	19.4445	4.33393	13.9336
LOC84989	-2.46951	0.292403	2.46951	0.292403	LOC84989	LOC84989	84989	uncharacterized LOC84989	LOC84989	0.716576	1.22222	0.550736	-1.22039	LOC84989	1.24444	1.2636	0.969396	0.503921	0.601874	-0.334829	LOC84989	1.0444	0.716576	1.48279	1.22222	0.930988	0.550736	0.27276	-1.22039	LOC84989	12.0415	17.0959	10.7339	3.14482
SNORA70	-2.46807	0.559708	2.46807	0.559708	SNORA70	SNORA70	26778	small nucleolar RNA, H/ACA box 70	SNORA70	0.651381	0.0320009	0.892034	-2.81542	SNORA70	194.461	198.958	0.341691	78.7906	153.287	-0.961694	SNORA70	241.023	0.651381	156.894	0.0320009	284.775	0.892034	21.7995	-2.81542	SNORA70	11.0052	7.1638	13.0029	0.995371
LOC642361	-2.46201	0.0560261	2.46201	0.0560261	LOC642361	LOC642361	642361	uncharacterized LOC642361	LOC642361	0.651099	0.442773	-0.448918	-1.05688	LOC642361	1.58297	1.5871	0.546936	0.64296	0.657285	-0.752899	LOC642361	1.70149	0.651099	1.47271	0.442773	0.793764	-0.448918	0.520807	-1.05688	LOC642361	26.0122	22.5146	12.135	7.96205
TUBB1	-2.44953	0.200086	2.44954	0.200086	TUBB1	TUBB1	81027	tubulin, beta 1 class VI	TUBB1	0.388018	0.313786	-1.62626	-0.25695	TUBB1	0.405431	0.405566	0.350902	0.165514	0.184504	-0.941606	TUBB1	0.415997	0.388018	0.395134	0.313786	0.102975	-1.62626	0.266033	-0.25695	TUBB1	14.0066	13.3041	3.46714	8.95731
LOC440905	-2.4432	0.305582	2.4432	0.305582	LOC440905	LOC440905	440905	uncharacterized LOC440905	LOC440905	0.42272	0.377399	0.0553251	-1.83275	LOC440905	0.846781	0.846885	0.400059	0.346587	0.423474	-0.888711	LOC440905	0.860186	0.42272	0.833584	0.377399	0.6668	0.0553251	0.180148	-1.83275	LOC440905	38.0179	36.8421	29.4707	7.96205
SAMD5	-2.44097	0.269264	2.44097	0.269264	SAMD5	SAMD5	389432	sterile alpha motif domain containing 5	SAMD5	-0.161204	1.50374	-0.442138	-0.790233	SAMD5	0.568917	0.666287	0.671269	0.23307	0.234768	-0.616185	SAMD5	0.319484	-0.161204	1.01309	1.50374	0.262954	-0.442138	0.206582	-0.790233	SAMD5	20.0094	63.4504	16.4689	12.9383
CRYGS	-2.43604	0.225103	2.43604	0.225103	CRYGS	CRYGS	1427	crystallin, gamma S	CRYGS	0.986177	0.0188594	-0.220753	-1.34329	CRYGS	1.10226	1.16478	0.502518	0.452479	0.487155	-0.78202	CRYGS	1.54127	0.986177	0.788292	0.0188594	0.667662	-0.220753	0.306648	-1.34329	CRYGS	10.0047	5.11697	4.33393	1.99051
SLC25A27	-2.41675	0.444278	2.41675	0.444278	SLC25A27	SLC25A27	9481	solute carrier family 25, member 27	SLC25A27	0.294432	0.519748	0.476006	-2.20796	SLC25A27	4.07398	4.08641	0.40709	1.68573	2.46915	-0.865975	SLC25A27	3.76795	0.294432	4.40486	0.519748	4.27331	0.476006	0.664984	-2.20796	SLC25A27	102.048	117.69	111.815	18.9099
TAF1L	-2.41239	0.249577	2.41239	0.249577	TAF1L	TAF1L	138474	TAF1 RNA polymerase II, TATA box binding protein (TBP)-associated factor, 210kDa-like	TAF1L	0.370964	0.674947	-1.52403	0.0290076	TAF1L	0.523972	0.526883	0.522956	0.2172	0.249429	-0.747509	TAF1L	0.471579	0.370964	0.582187	0.674947	0.126796	-1.52403	0.372062	0.0290076	TAF1L	29.0136	35.8188	7.80107	22.8909
HSF4	-2.40676	0.0237261	2.40676	0.0237261	HSF4	HSF4	3299	heat shock transcription factor 4	HSF4	1.19515	1.25067	0.152601	-0.240958	HSF4	1.28768	1.28791	1.22291	0.535026	0.54001	-0.0441789	HSF4	1.26314	1.19515	1.31269	1.25067	0.613213	0.152601	0.466808	-0.240958	HSF4	29.8275	32.2071	14.4802	11.4532
GPC4	-2.39727	0.340653	2.39727	0.340653	GPC4	GPC4	2239	glypican 4	GPC4	-0.779392	1.25329	-0.986319	-1.06256	GPC4	3.88937	4.89507	0.23695	1.62242	1.62298	-1.02444	GPC4	1.92278	-0.779392	7.86735	1.25329	1.66586	-0.986319	1.58011	-1.06256	GPC4	69.0325	282.456	59.8082	56.7296
GRIP1	-2.39694	0.312684	2.39694	0.312684	GRIP1	GRIP1	23426	glutamate receptor interacting protein 1	GRIP1	0.472479	0.230767	0.0251028	-1.84425	GRIP1	3.79788	3.81122	0.351623	1.58447	1.92879	-0.909574	GRIP1	4.12974	0.472479	3.49269	0.230767	3.02865	0.0251028	0.82893	-1.84425	GRIP1	205.096	171.93	149.087	40.8055
LOC100507266	-2.39555	0.148475	2.39555	0.148475	LOC100507266	LOC100507266	100507266	uncharacterized LOC100507266	LOC100507266	0.558056	0.453235	-1.30095	-0.208472	LOC100507266	0.913107	0.91371	0.505645	0.381168	0.408818	-0.754712	LOC100507266	0.946889	0.558056	0.880531	0.453235	0.261025	-1.30095	0.55661	-0.208472	LOC100507266	22.0103	20.4679	6.0675	12.9383
GRPR	-2.38993	0.0719109	2.38993	0.0719109	GRPR	GRPR	2925	gastrin-releasing peptide receptor	GRPR	0.442984	1.12774	-0.571297	-0.371909	GRPR	0.350623	0.360543	0.785364	0.146709	0.147059	-0.471603	GRPR	0.27655	0.442984	0.444536	1.12774	0.136913	-0.571297	0.157205	-0.371909	GRPR	7.00329	11.2573	3.46714	3.98103
GCNT1	-2.38967	0.434025	2.38967	0.434025	GCNT1	GCNT1	2650	glucosaminyl (N-acetyl) transferase 1, core 2	GCNT1	-0.930703	1.59661	-1.20486	-0.642862	GCNT1	0.979258	1.37954	0.332951	0.409787	0.417585	-0.923863	GCNT1	0.407849	-0.930703	2.35123	1.59661	0.337263	-1.20486	0.497907	-0.642862	GCNT1	22.0103	127.924	18.2025	26.8719
NINL	-2.38682	0.0740216	2.38682	0.0740216	NINL	NINL	22981	ninein-like	NINL	0.889208	0.167001	-0.750685	-0.703289	NINL	0.4311	0.444674	0.528104	0.180617	0.180641	-0.726987	NINL	0.553708	0.889208	0.335641	0.167001	0.177674	-0.750685	0.183608	-0.703289	NINL	27.0127	16.3743	8.66786	8.95731
SIM2	-2.37252	0.194735	2.37252	0.194735	SIM2	SIM2	6493	single-minded homolog 2 (Drosophila)	SIM2	-0.437493	0.819001	-0.893101	-1.21824	SIM2	4.56575	5.00554	0.190754	1.92443	1.93666	-1.05567	SIM2	2.95387	-0.437493	7.05722	0.819001	2.15397	-0.893101	1.71935	-1.21824	SIM2	120.056	259.942	87.5454	63.6964
PDE5A	-2.36163	0.0213566	2.36163	0.0213566	PDE5A	PDE5A	8654	phosphodiesterase 5A, cGMP-specific	PDE5A	0.341024	0.180642	-0.813184	-1.14472	PDE5A	0.355979	0.356529	0.260833	0.150734	0.151731	-0.97895	PDE5A	0.376326	0.341024	0.336732	0.180642	0.169088	-0.813184	0.134373	-1.14472	PDE5A	25.2974	22.6359	11.3672	9.03374
LOC400927	-2.35344	0.220611	2.35344	0.220611	LOC400927	LOC400927	400927	TPTE and PTEN homologous inositol lipid phosphatase pseudogene	LOC400927	0.287506	0.512834	-0.141819	-1.52739	LOC400927	2.58659	2.59448	0.40017	1.09907	1.22824	-0.834604	LOC400927	2.39228	0.287506	2.79668	0.512834	1.77653	-0.141819	0.679946	-1.52739	LOC400927	7.00329	8.18714	5.20072	1.99051
LOC100499405	-2.35344	0.324479	2.35344	0.324479	LOC100499405	LOC100499405	100499405	uncharacterized LOC100499405	LOC100499405	0.0539281	0.724038	-1.73797	0.0463891	LOC100499405	0.490576	0.503865	0.388983	0.20845	0.249596	-0.84579	LOC100499405	0.388906	0.0539281	0.618825	0.724038	0.112313	-1.73797	0.386879	0.0463891	LOC100499405	9.00423	14.3275	2.60036	8.95731
LOC728175	-2.35344	0.39561	2.35344	0.39561	LOC728175	LOC728175	728175	uncharacterized LOC728175	LOC728175	1.34009	0.150377	0.495727	-1.4748	LOC728175	0.542317	0.589074	0.745233	0.230436	0.286295	-0.489537	LOC728175	0.819074	1.34009	0.359074	0.150377	0.456189	0.495727	0.116401	-1.4748	LOC728175	14.0066	6.14036	7.80107	1.99051
USP35	-2.32959	0.0712704	2.32959	0.0712704	USP35	USP35	57558	ubiquitin specific peptidase 35	USP35	0.565917	0.222452	-0.527355	-1.12443	USP35	1.2895	1.29865	0.394185	0.553531	0.565425	-0.825894	USP35	1.45251	0.565917	1.14479	0.222452	0.680787	-0.527355	0.450063	-1.12443	USP35	61.0287	48.0995	28.6039	18.9099
PNMA2	-2.32747	0.268802	2.32747	0.268802	PNMA2	PNMA2	10687	paraneoplastic Ma antigen 2	PNMA2	-0.53236	0.99244	-0.733438	-1.24401	PNMA2	8.7902	10.0464	0.23004	3.77672	3.836	-0.988721	PNMA2	5.18195	-0.53236	14.9109	0.99244	4.50778	-0.733438	3.16422	-1.24401	PNMA2	246.116	708.188	214.096	150.284
VAMP5	-2.32268	0.394565	2.32268	0.394565	VAMP5	VAMP5	10791	vesicle-associated membrane protein 5 (myobrevin)	VAMP5	1.15147	1.18416	1.08205	-1.17799	VAMP5	2.16275	2.16289	1.16782	0.931146	1.23168	-0.0479714	VAMP5	2.13839	1.15147	2.18739	1.18416	2.03792	1.08205	0.42545	-1.17799	VAMP5	10.0047	10.2339	9.53465	1.99051
LOC100128640	-2.31416	0.489813	2.31416	0.489813	LOC100128640				LOC100128640	1.40203	0.869113	1.3432	-1.49304	LOC100128640	1.30157	1.32384	1.13557	0.562437	0.856752	-0.0749169	LOC100128640	1.5656	1.40203	1.08207	0.869113	1.50304	1.3432	0.210464	-1.49304	LOC100128640	37.0174	25.5848	35.5382	4.97628
SLC27A3	-2.31366	0.142873	2.31366	0.142873	SLC27A3	SLC27A3	11000	solute carrier family 27 (fatty acid transporter), member 3	SLC27A3	0.352544	0.998209	-0.134494	-0.935103	SLC27A3	0.942161	0.965848	0.675377	0.407217	0.422994	-0.534798	SLC27A3	0.753257	0.352544	1.17844	0.998209	0.53744	-0.134494	0.308548	-0.935103	SLC27A3	17.008	26.6082	12.135	6.9668
RASSF9	-2.31103	0.38076	2.31103	0.38076	RASSF9	RASSF9	9182	Ras association (RalGDS/AF-6) domain family (N-terminal) member 9	RASSF9	0.157393	1.72059	0.480977	-1.02007	RASSF9	0.951896	1.09504	0.93899	0.411893	0.468896	-0.269546	RASSF9	0.553739	0.157393	1.63634	1.72059	0.692969	0.480977	0.244824	-1.02007	RASSF9	9.00423	26.6082	11.2682	3.98103
UCA1	-2.29672	0.446012	2.29672	0.446012	UCA1	UCA1	652995	urothelial cancer associated 1 (non-protein coding)	UCA1	0.0474291	-1.24182	-2.89646	-0.697075	UCA1	1.03733	1.14261	-0.597194	0.451657	0.589346	-1.79677	UCA1	1.62169	0.0474291	0.663538	-1.24182	0.21075	-2.89646	0.967943	-0.697075	UCA1	20.0094	8.18714	2.60036	11.9431
PRR22	-2.28521	0.00507495	2.28521	0.00507495	PRR22	PRR22	163154	proline rich 22	PRR22	0.760659	0.918867	-0.320741	-0.384382	PRR22	0.958914	0.960356	0.839763	0.419618	0.41972	-0.352562	PRR22	0.907751	0.760659	1.01296	0.918867	0.428976	-0.320741	0.410464	-0.384382	PRR22	11.0052	12.2807	5.20072	4.97628
C11orf65	-2.2852	0.570469	2.2852	0.570469	C11orf65	C11orf65	160140	chromosome 11 open reading frame 65	C11orf65	-0.714292	1.77782	-1.92122	0.600099	C11orf65	0.561853	0.784773	0.531762	0.245866	0.34586	-0.660559	C11orf65	0.236877	-0.714292	1.33267	1.77782	0.102613	-1.92122	0.589107	0.600099	C11orf65	2.00094	11.2573	0.866786	4.97628
SPON2	-2.27885	0.122806	2.27885	0.122806	SPON2	SPON2	10417	spondin 2, extracellular matrix protein	SPON2	0.604287	0.151523	-0.410054	-1.21075	SPON2	0.365821	0.370334	0.377905	0.160529	0.166749	-0.8104	SPON2	0.427973	0.604287	0.312695	0.151523	0.21187	-0.410054	0.121629	-1.21075	SPON2	7.00329	5.11697	3.46714	1.99051
ZNF253	-2.27795	0.0300323	2.27795	0.0300323	ZNF253	ZNF253	56242	zinc finger protein 253	ZNF253	0.0784654	0.495811	-0.872123	-0.929071	ZNF253	3.83277	3.87293	0.287138	1.68255	1.68288	-0.900597	ZNF253	3.31662	0.0784654	4.42924	0.495811	1.71609	-0.872123	1.64967	-0.929071	ZNF253	72.0339	96.1989	37.2718	35.8292
C3orf65	-2.26783	0.219181	2.26783	0.219181	C3orf65	C3orf65	646600	chromosome 3 open reading frame 65	C3orf65	0.71243	-0.147973	-0.387584	-1.41059	C3orf65	0.536816	0.560859	0.282229	0.236708	0.251742	-0.899086	C3orf65	0.723317	0.71243	0.398402	-0.147973	0.337436	-0.387584	0.166049	-1.41059	C3orf65	13.0061	7.16375	6.0675	2.98577
ZNF331	-2.26165	0.294749	2.26165	0.294749	ZNF331	ZNF331	55422	zinc finger protein 331	ZNF331	-0.482299	0.252026	-0.540447	-2.04457	ZNF331	4.71601	4.86956	-0.115136	2.08521	2.375	-1.29251	ZNF331	3.65635	-0.482299	6.08277	0.252026	3.51191	-0.540447	1.2381	-2.04457	ZNF331	145.068	276.316	144.753	48.7676
LOC284408	-2.24134	0.220121	2.24134	0.220121	LOC284408				LOC284408	0.460357	1.76606	-0.153374	0.0510607	LOC284408	2.17914	2.40609	1.11321	0.972246	0.974687	-0.0511568	LOC284408	1.38598	0.460357	3.42619	1.76606	0.905744	-0.153374	1.04363	0.0510607	LOC284408	12.0056	29.6784	7.80107	6.9668
LOC100288198	-2.2395	0.00370527	2.2395	0.00370527	LOC100288198	LOC100288198	100288198	uncharacterized LOC100288198	LOC100288198	0.427872	0.532838	-0.730644	-0.635004	LOC100288198	2.05064	2.05199	0.480355	0.915666	0.916169	-0.682824	LOC100288198	1.97738	0.427872	2.12661	0.532838	0.885813	-0.730644	0.946526	-0.635004	LOC100288198	56.3925	60.6485	25.2624	26.9938
NFKBID	-2.23309	0.19861	2.23309	0.19861	NFKBID	NFKBID	84807	nuclear factor of kappa light polypeptide gene enhancer in B-cells inhibitor, delta	NFKBID	0.668299	-0.25679	-0.552989	-1.35359	NFKBID	4.40427	4.63258	0.205754	1.97227	2.04868	-0.95329	NFKBID	6.06895	0.668299	3.1962	-0.25679	2.60297	-0.552989	1.49439	-1.35359	NFKBID	101.048	53.2164	43.3393	24.8814
PAN3-AS1	-2.22645	0.204074	2.22645	0.204074	PAN3-AS1	PAN3-AS1	100288730	PAN3 antisense RNA 1	PAN3-AS1	-0.0653638	1.01984	-0.375343	-0.97967	PAN3-AS1	1.91911	2.05645	0.477238	0.86196	0.880935	-0.677507	PAN3-AS1	1.31753	-0.0653638	2.79537	1.01984	1.06279	-0.375343	0.69908	-0.97967	PAN3-AS1	26.7537	56.7623	21.5809	14.1954
LOC100505716	-2.22201	0.353133	2.22201	0.353133	LOC100505716	LOC100505716	100505716	uncharacterized LOC100505716	LOC100505716	0.928765	0.261008	0.343323	-1.45728	LOC100505716	1.05965	1.08815	0.594886	0.476888	0.572798	-0.55698	LOC100505716	1.33558	0.928765	0.840727	0.261008	0.890091	0.343323	0.255504	-1.45728	LOC100505716	26.0122	16.3743	17.3357	4.97628
HLA-J	-2.21264	0.372062	2.21264	0.372062	HLA-J	HLA-J	3137	major histocompatibility complex, class I, J (pseudogene)	HLA-J	1.02482	-0.81697	-0.641541	-1.44215	HLA-J	0.422059	0.511002	0.103924	0.190749	0.198139	-1.04185	HLA-J	0.79908	1.02482	0.222924	-0.81697	0.251748	-0.641541	0.14453	-1.44215	HLA-J	11.0052	3.07018	3.46714	1.99051
ZGLP1	-2.21163	0.303312	2.21163	0.303312	ZGLP1	ZGLP1	100125288	zinc finger, GATA-like protein 1	ZGLP1	0.32117	1.02628	0.284166	-1.22693	ZGLP1	2.25281	2.32041	0.673725	1.01862	1.16153	-0.471383	ZGLP1	1.76439	0.32117	2.87643	1.02628	1.71971	0.284166	0.60335	-1.22693	ZGLP1	32.0151	52.193	31.2043	10.9478
PKD1L2	-2.20895	0.282428	2.20895	0.282428	PKD1L2	PKD1L2	114780	polycystic kidney disease 1-like 2	PKD1L2	0.210454	1.74791	-0.321786	-0.00656997	PKD1L2	1.38706	1.58867	0.979181	0.627929	0.63168	-0.164178	PKD1L2	0.814116	0.210454	2.36323	1.74791	0.562945	-0.321786	0.700415	-0.00656997	PKD1L2	38.0179	88.0118	24.27	29.8577
LOC284440	-2.19823	0.059385	2.19823	0.059385	LOC284440				LOC284440	0.551125	0.505805	-0.318769	-0.896986	LOC284440	0.844849	0.844954	0.528465	0.384332	0.392074	-0.607877	LOC284440	0.858224	0.551125	0.831683	0.505805	0.469609	-0.318769	0.31454	-0.896986	LOC284440	19.0089	18.4211	10.4014	6.9668
IKZF2	-2.18716	0.170445	2.18716	0.170445	IKZF2	IKZF2	22807	IKAROS family zinc finger 2 (Helios)	IKZF2	0.977333	0.113801	-0.903509	-0.26348	IKZF2	0.351066	0.366905	0.545567	0.160512	0.164477	-0.583494	IKZF2	0.473547	0.977333	0.260264	0.113801	0.12858	-0.903509	0.200374	-0.26348	IKZF2	45.0212	24.5614	12.135	18.9099
MPZL2	-2.18457	0.244977	2.18457	0.244977	MPZL2	MPZL2	10205	myelin protein zero-like 2	MPZL2	0.47832	1.81993	0.192905	-0.149359	MPZL2	8.11384	9.00683	1.14912	3.71415	3.74031	0.0217731	MPZL2	5.09676	0.47832	12.9169	1.81993	4.18192	0.192905	3.29871	-0.149359	MPZL2	112.053	310.088	97.9468	75.6395
LOC100507410	-2.17887	0.338393	2.17887	0.338393	LOC100507410	LOC100507410	100507410	uncharacterized LOC100507410	LOC100507410	-0.385298	-0.352604	-0.592221	-2.39284	LOC100507410	1.11198	1.11205	-0.368951	0.510347	0.612988	-1.49253	LOC100507410	1.09945	-0.385298	1.12465	-0.352604	0.952545	-0.592221	0.27343	-2.39284	LOC100507410	8.00376	8.18714	6.93429	1.9905
CBY3	-2.17886	0.00798817	2.17887	0.00798817	CBY3	CBY3	646019	chibby homolog 3 (Drosophila)	CBY3	0.680096	0.712777	-0.526837	-0.327442	CBY3	0.328342	0.328363	0.696437	0.150694	0.151054	-0.42714	CBY3	0.324644	0.680096	0.332082	0.712777	0.140632	-0.526837	0.161476	-0.327442	CBY3	2.00094	2.04679	0.866786	0.995257
LOC100506713	-2.17886	0.300572	2.17886	0.300572	LOC100506713	LOC100506713	100506713	uncharacterized LOC100506713	LOC100506713	0.180194	0.405522	-0.0267335	-1.6347	LOC100506713	3.33924	3.34943	0.292858	1.53256	1.77676	-0.830716	LOC100506713	3.08839	0.180194	3.61046	0.405522	2.67572	-0.0267335	0.877799	-1.6347	LOC100506713	14.0066	16.3743	12.135	3.98103
EGFL8	-2.17107	0.0150092	2.17107	0.0150092	EGFL8	EGFL8	80864	EGF-like-domain, multiple 8	EGFL8	0.305203	0.562879	-0.735415	-0.633316	EGFL8	6.9217	6.94932	0.434041	3.18815	3.19014	-0.684365	EGFL8	6.33036	0.305203	7.56827	0.562879	3.07731	-0.735415	3.30298	-0.633316	EGFL8	71.2933	85.812	34.9129	37.4732
LOC344887	-2.16976	0.272679	2.16976	0.272679	LOC344887	LOC344887	344887	NmrA-like family domain containing 1 pseudogene	LOC344887	-0.142381	1.17041	-0.249776	-0.957275	LOC344887	2.20215	2.43404	0.514013	1.01492	1.04559	-0.603526	LOC344887	1.39718	-0.142381	3.47089	1.17041	1.29695	-0.249776	0.794227	-0.957275	LOC344887	28.0132	69.5907	26.0036	15.9241
CBX3P2	-2.14839	0.314853	2.14839	0.314853	CBX3P2	CBX3P2	645158	chromobox homolog 3 pseudogene 2	CBX3P2	1.21726	-0.235484	-0.212065	-1.01267	CBX3P2	0.677139	0.764793	0.49089	0.315184	0.327395	-0.612366	CBX3P2	1.12031	1.21726	0.409277	-0.235484	0.415975	-0.212065	0.238815	-1.01267	CBX3P2	14.0066	5.11697	5.20072	2.98577
UPK2	-2.14838	0.390344	2.14838	0.390344	UPK2	UPK2	7379	uroplakin 2	UPK2	0.634338	0.152449	0.275406	-1.69512	UPK2	1.13891	1.15483	0.393393	0.530122	0.658626	-0.709859	UPK2	1.34592	0.634338	0.963732	0.152449	1.04947	0.275406	0.267782	-1.69512	UPK2	10.0047	7.16375	7.80107	1.99051
GATM	-2.14838	0.554858	2.14838	0.554858	GATM	GATM	2628	glycine amidinotransferase (L-arginine:glycine amidinotransferase)	GATM	-0.499273	1.36991	-1.9286	0.592725	GATM	0.549701	0.669134	0.435317	0.255867	0.35993	-0.667935	GATM	0.287599	-0.499273	1.05067	1.36991	0.106787	-1.9286	0.613072	0.592725	GATM	7.00329	25.5848	2.60036	14.9288
EGLN3	-2.14455	0.235918	2.14455	0.235918	EGLN3	EGLN3	112399	egl nine homolog 3 (C. elegans)	EGLN3	0.253446	1.0704	-0.953486	0.0759834	EGLN3	0.928476	0.96594	0.661922	0.432947	0.460797	-0.438751	EGLN3	0.699531	0.253446	1.23235	1.0704	0.303029	-0.953486	0.618565	0.0759834	EGLN3	18.0085	31.7252	7.80107	15.9241
C16orf79	-2.14144	0.355726	2.14144	0.355726	C16orf79	C16orf79	283870	chromosome 16 open reading frame 79	C16orf79	0.466719	0.412863	0.262946	-1.58052	C16orf79	1.98115	1.9815	0.439791	0.925151	1.12048	-0.65879	C16orf79	2.01848	0.466719	1.94452	0.412863	1.7526	0.262946	0.488363	-1.58052	C16orf79	17.0091	16.3859	14.7686	4.11528
ZNF813	-2.14064	0.138765	2.14064	0.138765	ZNF813	ZNF813	126017	zinc finger protein 813	ZNF813	-0.38979	0.520902	-0.981742	-1.08322	ZNF813	3.73598	3.92361	0.0655561	1.74527	1.74635	-1.03248	ZNF813	2.72478	-0.38979	5.12244	0.520902	1.80774	-0.981742	1.68495	-1.08322	ZNF813	111.052	208.772	73.6768	68.6727
FLJ10661	-2.1389	0.35013	2.1389	0.35013	FLJ10661				FLJ10661	0.557164	-0.157237	-0.0631004	-1.73072	FLJ10661	3.17603	3.27388	0.199963	1.48489	1.73987	-0.896908	FLJ10661	4.0683	0.557164	2.47946	-0.157237	2.64664	-0.0631004	0.833091	-1.73072	FLJ10661	48.0226	30.7018	32.9379	9.95257
ZNF782	-2.1378	0.0600427	2.1378	0.0600427	ZNF782	ZNF782	158431	zinc finger protein 782	ZNF782	0.309957	0.720004	-0.388361	-0.77393	ZNF782	3.51823	3.55382	0.514981	1.64572	1.66044	-0.581145	ZNF782	3.05215	0.309957	4.05548	0.720004	1.88101	-0.388361	1.43987	-0.77393	ZNF782	97.0456	128.948	59.8082	45.7818
CORO2B	-2.13129	0.602675	2.13129	0.602675	CORO2B	CORO2B	10391	coronin, actin binding protein, 2B	CORO2B	-0.518605	2.14636	-1.46252	0.906826	CORO2B	0.78708	1.14734	0.813879	0.369298	0.50096	-0.277847	CORO2B	0.312537	-0.518605	1.98215	2.14636	0.162463	-1.46252	0.839458	0.906826	CORO2B	10.0047	63.4504	5.20072	26.8719
COL4A5	-2.13087	0.252169	2.13087	0.252169	COL4A5	COL4A5	1287	collagen, type IV, alpha 5	COL4A5	1.28504	1.0108	0.727749	-0.614805	COL4A5	2.35514	2.36579	1.14792	1.10525	1.22707	0.0564723	COL4A5	2.58997	1.28504	2.14161	1.0108	1.76009	0.727749	0.694042	-0.614805	COL4A5	167.079	138.158	113.549	44.7865
TSC1	-2.12976	0.064809	2.12976	0.064809	TSC1	TSC1	7248	tuberous sclerosis 1	TSC1	0.170083	0.727645	-0.554777	-0.728873	TSC1	6.72154	6.84743	0.448864	3.15601	3.16176	-0.641825	TSC1	5.54048	0.170083	8.15437	0.727645	3.3523	-0.554777	2.97122	-0.728873	TSC1	476.224	701.024	288.64	255.781
FAM59B	-2.12877	0.231074	2.12877	0.231074	FAM59B	FAM59B	150946	family with sequence similarity 59, member B	FAM59B	-0.328125	0.926948	-0.660589	-0.92063	FAM59B	0.458198	0.502232	0.299412	0.215241	0.216115	-0.790609	FAM59B	0.296583	-0.328125	0.707882	0.926948	0.23554	-0.660589	0.196691	-0.92063	FAM59B	12.0056	28.655	9.53465	7.96205
LOC338739	-2.12635	0.182088	2.12635	0.182088	LOC338739	LOC338739	338739	uncharacterized LOC338739	LOC338739	0.409906	0.764516	0.010331	-1.01267	LOC338739	0.477233	0.480842	0.587211	0.224437	0.238692	-0.501171	LOC338739	0.422043	0.409906	0.539641	0.764516	0.319943	0.010331	0.157441	-1.01267	LOC338739	8.00376	10.2339	6.0675	2.98577
TBC1D4	-2.12369	0.117672	2.1237	0.117672	TBC1D4	TBC1D4	9882	TBC1 domain family, member 4	TBC1D4	0.359996	1.16711	-0.394428	-0.25162	TBC1D4	1.59572	1.65856	0.763553	0.751388	0.752308	-0.323024	TBC1D4	1.20635	0.359996	2.11076	1.16711	0.715104	-0.394428	0.789512	-0.25162	TBC1D4	76.0357	133.041	45.0729	49.7628
SND1-IT1	-2.11845	0.159584	2.11845	0.159584	SND1-IT1	SND1-IT1	27099	SND1 intronic transcript 1 (non-protein coding)	SND1-IT1	0.823503	-0.143815	-0.842858	-0.643467	SND1-IT1	0.651077	0.688008	0.339844	0.307337	0.308071	-0.743162	SND1-IT1	0.910391	0.823503	0.465625	-0.143815	0.286816	-0.842858	0.329326	-0.643467	SND1-IT1	22.0103	11.2573	6.93429	7.96205
RNF144A	-2.11228	0.231555	2.11228	0.231555	RNF144A	RNF144A	9781	ring finger protein 144A	RNF144A	-0.0163852	0.2876	-0.326408	-1.55998	RNF144A	0.569161	0.572323	0.135607	0.269454	0.294456	-0.943192	RNF144A	0.512249	-0.0163852	0.632397	0.2876	0.413195	-0.326408	0.175717	-1.55998	RNF144A	29.0136	35.8188	23.4032	9.95257
HIST1H3B	-2.10967	0.449427	2.10967	0.449427	HIST1H3B	HIST1H3B	8358	histone cluster 1, H3b	HIST1H3B	0.517543	-0.186745	-2.01132	0.188072	HIST1H3B	1.4503	1.49371	0.165399	0.68745	0.897023	-0.911622	HIST1H3B	1.85124	0.517543	1.13619	-0.186745	0.320775	-2.01132	1.47327	0.188072	HIST1H3B	5.00235	3.07018	0.866786	3.98103
KLF9	-2.10967	0.382308	2.10967	0.382308	KLF9	KLF9	687	Kruppel-like factor 9	KLF9	0.904004	0.714294	0.697075	-1.23282	KLF9	0.640371	0.641756	0.809149	0.30354	0.374005	-0.267871	KLF9	0.68389	0.904004	0.599622	0.714294	0.592508	0.697075	0.155503	-1.23282	KLF9	35.0165	30.7018	30.3375	7.96205
RAPGEFL1	-2.10367	0.201604	2.10367	0.201604	RAPGEFL1	RAPGEFL1	51195	Rap guanine nucleotide exchange factor (GEF)-like 1	RAPGEFL1	-0.125785	0.972985	-0.809152	-0.489466	RAPGEFL1	1.30018	1.3956	0.4236	0.618055	0.621853	-0.649309	RAPGEFL1	0.888431	-0.125785	1.90277	0.972985	0.553235	-0.809152	0.69047	-0.489466	RAPGEFL1	32.0151	68.5673	19.9361	24.8814
SLC6A16	-2.0996	0.222459	2.0996	0.222459	SLC6A16	SLC6A16	28968	solute carrier family 6, member 16	SLC6A16	0.165807	1.09157	-0.041123	-0.841728	SLC6A16	0.691833	0.727749	0.62869	0.329507	0.342272	-0.441426	SLC6A16	0.501949	0.165807	0.953549	1.09157	0.434878	-0.041123	0.249667	-0.841728	SLC6A16	14.0066	26.6082	12.135	6.9668
LOC100129794	-2.09668	0.326575	2.09668	0.326575	LOC100129794	LOC100129794	100129794	uncharacterized LOC100129794	LOC100129794	0.902397	0.587997	0.491147	-1.13696	LOC100129794	3.83803	3.86084	0.745197	1.83053	2.12975	-0.322909	LOC100129794	4.27987	0.902397	3.44181	0.587997	3.21834	0.491147	1.04117	-1.13696	LOC100129794	68.3668	54.9796	51.4099	16.6317
HESX1	-2.09399	0.529777	2.09399	0.529777	HESX1	HESX1	8820	HESX homeobox 1	HESX1	1.12632	0.718441	1.25643	-1.54418	HESX1	1.6702	1.68692	0.922383	0.797618	1.20377	-0.143872	HESX1	1.92381	1.12632	1.45003	0.718441	2.10537	1.25643	0.302177	-1.54418	HESX1	19.0089	14.3275	20.8029	2.98577
KIAA1656	-2.0911	0.32967	2.0911	0.32967	KIAA1656	KIAA1656	85371	KIAA1656 protein	KIAA1656	0.849729	0.337495	0.322082	-1.26338	KIAA1656	0.385255	0.391342	0.593612	0.184236	0.212755	-0.47065	KIAA1656	0.460095	0.849729	0.322589	0.337495	0.319161	0.322082	0.10635	-1.26338	KIAA1656	34.8516	24.4357	24.1761	8.05586
FAM155B	-2.09071	0.0812357	2.09071	0.0812357	FAM155B	FAM155B	27112	family with sequence similarity 155, member B	FAM155B	0.5004	0.381073	-0.940999	-0.305509	FAM155B	0.983907	0.984749	0.440737	0.47061	0.48207	-0.623254	FAM155B	1.02545	0.5004	0.944047	0.381073	0.377581	-0.940999	0.586559	-0.305509	FAM155B	40.0188	36.8421	14.7354	22.8909
DDX11L2	-2.08736	0.311024	2.08736	0.311024	DDX11L2	DDX11L2	84771	DEAD/H (Asp-Glu-Ala-Asp/His) box helicase 11 like 2	DDX11L2	0.0991205	0.784244	-1.33157	0.0915772	DDX11L2	0.444468	0.457057	0.441682	0.212933	0.239363	-0.619999	DDX11L2	0.350525	0.0991205	0.563588	0.784244	0.130028	-1.33157	0.348697	0.0915772	DDX11L2	7.00329	11.2573	2.60036	6.9668
PRR15L	-2.0861	0.623924	2.0861	0.623924	PRR15L	PRR15L	79170	proline rich 15-like	PRR15L	1.6284	-1.79835	-0.453	-1.83857	PRR15L	0.557396	0.998913	-0.0849769	0.267196	0.298599	-1.14578	PRR15L	1.82785	1.6284	0.169976	-1.79835	0.431895	-0.453	0.165303	-1.83857	PRR15L	22.0103	2.04679	5.20072	1.99051
ZNF682	-2.08051	0.440797	2.08051	0.440797	ZNF682	ZNF682	91120	zinc finger protein 682	ZNF682	-1.06887	1.0899	-1.29656	-0.796282	ZNF682	0.977744	1.2644	0.010517	0.469954	0.477036	-1.04642	ZNF682	0.462699	-1.06887	2.0661	1.0899	0.395145	-1.29656	0.558926	-0.796282	ZNF682	14.0066	63.4504	12.135	16.9194
VMO1	-2.07869	0.255428	2.07869	0.255428	VMO1	VMO1	284013	vitelline membrane outer layer 1 homolog (chicken)	VMO1	1.16518	0.978782	0.679033	-0.646419	VMO1	1.44101	1.44402	1.07198	0.693228	0.767666	0.0163069	VMO1	1.53717	1.16518	1.35086	0.978782	1.09743	0.679033	0.437901	-0.646419	VMO1	8.00376	6.14036	6.0675	1.99051
GDF9	-2.07856	0.357803	2.07856	0.357803	GDF9	GDF9	2661	growth differentiation factor 9	GDF9	0.00612956	1.46508	0.191517	-0.831482	GDF9	1.43042	1.61721	0.735604	0.688178	0.731885	-0.319983	GDF9	0.862721	0.00612956	2.37169	1.46508	0.981019	0.191517	0.482752	-0.831482	GDF9	16.0075	44.0059	18.2025	8.95731
BDNF-AS1	-2.07486	0.103627	2.07486	0.103627	BDNF-AS1	BDNF-AS	497258	BDNF antisense RNA	BDNF-AS1	0.417577	-0.0567822	-0.590932	-1.1543	BDNF-AS1	3.12934	3.17172	0.180397	1.50822	1.53706	-0.872614	BDNF-AS1	3.68851	0.417577	2.65494	-0.0567822	1.83341	-0.590932	1.24071	-1.1543	BDNF-AS1	42.3168	30.8297	20.7034	13.8278
ANKRD23	-2.07299	0.0274519	2.07299	0.0274519	ANKRD23	ANKRD23	200539	ankyrin repeat domain 23	ANKRD23	0.0155958	0.363775	-0.825215	-0.898836	ANKRD23	2.08949	2.10472	0.189685	1.00796	1.00829	-0.862025	ANKRD23	1.85197	0.0155958	2.35747	0.363775	1.03401	-0.825215	0.982568	-0.898836	ANKRD23	45.0212	57.31	25.1368	23.8862
CAPS	-2.07182	0.492865	2.07182	0.492865	CAPS	CAPS	828	calcyphosine	CAPS	0.970982	0.14115	0.697944	-1.68761	CAPS	1.0462	1.08976	0.556066	0.504965	0.687606	-0.494832	CAPS	1.39481	0.970982	0.784713	0.14115	1.15431	0.697944	0.220902	-1.68761	CAPS	20.0097	11.2573	15.6022	2.98577
TSSK3	-2.06705	0.20308	2.06705	0.20308	TSSK3	TSSK3	81629	testis-specific serine kinase 3	TSSK3	0.418923	0.451603	-0.0510446	-1.17358	TSSK3	0.535614	0.535648	0.435263	0.25912	0.278977	-0.612313	TSSK3	0.529582	0.418923	0.541715	0.451603	0.382348	-0.0510446	0.175607	-1.17358	TSSK3	6.00282	6.14036	4.33393	1.99051
POPDC2	-2.06705	0.0125324	2.06705	0.0125324	POPDC2	POPDC2	64091	popeye domain containing 2	POPDC2	0.667292	0.869899	-0.21771	-0.340244	POPDC2	0.583913	0.585353	0.768596	0.282486	0.282741	-0.278977	POPDC2	0.544318	0.667292	0.626388	0.869899	0.294741	-0.21771	0.270741	-0.340244	POPDC2	8.00376	9.21054	4.33393	3.98103
C12orf39	-2.06705	0.202748	2.06705	0.202748	C12orf39	C12orf39	80763	chromosome 12 open reading frame 39	C12orf39	-0.850123	-0.232475	-2.05705	-1.12069	C12orf39	1.93694	1.98148	-0.541299	0.937056	0.986833	-1.58887	C12orf39	1.56369	-0.850123	2.39928	-0.232475	0.677375	-2.05705	1.29629	-1.12069	C12orf39	6.00282	9.21054	2.60036	4.97628
ZRANB2-AS2	-2.06704	0.202747	2.06704	0.202747	ZRANB2-AS2	ZRANB2-AS2	100852410	ZRANB2 antisense RNA 2 (head to head)	ZRANB2-AS2	0.0572633	0.674909	-1.14966	-0.213304	ZRANB2-AS2	1.26306	1.29211	0.366086	0.611048	0.643506	-0.681482	ZRANB2-AS2	1.01967	0.0572633	1.56455	0.674909	0.441712	-1.14966	0.8453	-0.213304	ZRANB2-AS2	6.00282	9.21054	2.60036	4.97628
TMEM217	-2.06438	0.376789	2.06438	0.376789	TMEM217	TMEM217	221468	transmembrane protein 217	TMEM217	-0.035528	0.743084	0.150343	-1.53421	TMEM217	0.520586	0.539655	0.353778	0.252175	0.296386	-0.691933	TMEM217	0.397466	-0.035528	0.681845	0.743084	0.452119	0.150343	0.140654	-1.53421	TMEM217	7.26497	11.4269	7.09447	1.99042
RSPH9	-2.05643	0.400551	2.05643	0.400551	RSPH9	RSPH9	221421	radial spoke head 9 homolog (Chlamydomonas)	RSPH9	0.769427	-0.519875	-0.174505	-1.65623	RSPH9	0.414456	0.456525	0.124776	0.201542	0.228705	-0.915366	RSPH9	0.647945	0.769427	0.265106	-0.519875	0.336811	-0.174505	0.120599	-1.65623	RSPH9	5.00235	2.04679	2.60036	0.995257
DUSP16	-2.05629	0.213057	2.05629	0.213057	DUSP16	DUSP16	80824	dual specificity phosphatase 16	DUSP16	0.301347	0.14437	-0.245924	-1.38845	DUSP16	2.09181	2.09491	0.222859	1.01727	1.09807	-0.817187	DUSP16	2.20877	0.301347	1.98105	0.14437	1.51149	-0.245924	0.684654	-1.38845	DUSP16	138.065	123.831	94.4797	42.796
SETMAR	-2.05337	0.176601	2.05337	0.176601	SETMAR	SETMAR	6419	SET domain and mariner transposase fusion gene	SETMAR	0.470809	1.4824	-0.055166	-0.0676163	SETMAR	3.08604	3.27765	0.976606	1.50291	1.50293	-0.0613912	SETMAR	2.17341	0.470809	4.38189	1.4824	1.50941	-0.055166	1.49644	-0.0676163	SETMAR	43.0202	82.8948	29.4707	29.8577
PTGFRN	-2.05288	0.110446	2.05288	0.110446	PTGFRN	PTGFRN	5738	prostaglandin F2 receptor negative regulator	PTGFRN	0.182706	0.542684	-0.343917	-1.006	PTGFRN	2.99386	3.01719	0.362695	1.45837	1.49693	-0.674957	PTGFRN	2.64271	0.182706	3.39167	0.542684	1.83451	-0.343917	1.15935	-1.006	PTGFRN	161.076	206.725	111.815	70.6632
USP20	-2.05198	0.277612	2.05198	0.277612	USP20	USP20	10868	ubiquitin specific peptidase 20	USP20	0.174345	0.404921	-0.0550025	-1.43977	USP20	5.67879	5.69693	0.289633	2.76746	3.09234	-0.747387	USP20	5.24265	0.174345	6.15122	0.404921	4.47209	-0.0550025	1.71259	-1.43977	USP20	223.105	269.152	191.56	73.649
LYG1	-2.04589	0.227781	2.04589	0.227781	LYG1	LYG1	129530	lysozyme G-like 1	LYG1	-0.35536	0.677324	-1.17896	-0.564531	LYG1	4.11061	4.3767	0.160982	2.0092	2.05493	-0.871746	LYG1	2.8739	-0.35536	5.8795	0.677324	1.62384	-1.17896	2.48602	-0.564531	LYG1	23.0108	47.0761	13.0018	19.9051
LINC00174	-2.04074	0.0962519	2.04074	0.0962519	LINC00174	LINC00174	285908	long intergenic non-protein coding RNA 174	LINC00174	0.851116	0.209205	-0.373299	-0.624569	LINC00174	1.53975	1.57801	0.530161	0.754504	0.757367	-0.498934	LINC00174	1.92339	0.851116	1.23263	0.209205	0.823155	-0.373299	0.691579	-0.624569	LINC00174	83.039	53.2164	35.5382	29.8577
CTTNBP2	-2.03913	0.281787	2.03913	0.281787	CTTNBP2	CTTNBP2	83992	cortactin binding protein 2	CTTNBP2	0.182416	1.35754	0.130207	-0.646153	CTTNBP2	1.35064	1.46421	0.769978	0.662361	0.686482	-0.257973	CTTNBP2	0.898804	0.182416	2.02961	1.35754	0.866859	0.130207	0.506105	-0.646153	CTTNBP2	53.0249	119.737	51.1404	29.8577
ZNF233	-2.03832	0.21867	2.03832	0.21867	ZNF233	ZNF233	353355	zinc finger protein 233	ZNF233	-0.237872	0.60223	-0.444829	-1.24558	ZNF233	0.409261	0.426731	0.182179	0.200783	0.208565	-0.845202	ZNF233	0.305881	-0.237872	0.547581	0.60223	0.265004	-0.444829	0.152126	-1.24558	ZNF233	8.00376	14.3275	6.93429	3.98103
PRAP1	-2.03827	0.661017	2.03827	0.661017	PRAP1	PRAP1	118471	proline-rich acidic protein 1	PRAP1	1.57403	-0.615768	1.1447	-2.24113	PRAP1	1.1817	1.53867	0.479132	0.579758	1.02686	-0.548215	PRAP1	2.5241	1.57403	0.553237	-0.615768	1.87441	1.1447	0.17932	-2.24113	PRAP1	14.0066	3.07018	10.4014	0.995257
RPL23AP64	-2.03814	0.368946	2.03814	0.368946	RPL23AP64	RPL23AP64	649946	ribosomal protein L23a pseudogene 64	RPL23AP64	1.51956	-0.255115	-0.49473	-0.295336	RPL23AP64	0.870178	1.04002	0.632222	0.426947	0.427966	-0.395033	RPL23AP64	1.60962	1.51956	0.470428	-0.255115	0.398439	-0.49473	0.457494	-0.295336	RPL23AP64	7.00329	2.04679	1.73357	1.99051
FAM132A	-2.03814	0.2581	2.03814	0.2581	FAM132A	FAM132A	388581	family with sequence similarity 132, member A	FAM132A	-0.0928092	1.16226	-0.299739	-0.685312	FAM132A	0.542361	0.594484	0.534727	0.266106	0.268485	-0.492525	FAM132A	0.35106	-0.0928092	0.837907	1.16226	0.304151	-0.299739	0.23282	-0.685312	FAM132A	3.00141	7.16375	2.60036	1.99051
LOC143666	-2.03814	0.497444	2.03814	0.497444	LOC143666	LOC143666	143666	uncharacterized LOC143666	LOC143666	0.833059	0.0881342	0.626128	-1.75944	LOC143666	0.484312	0.500542	0.460597	0.237625	0.323572	-0.566654	LOC143666	0.626971	0.833059	0.374113	0.0881342	0.543194	0.626128	0.103951	-1.75944	LOC143666	12.0056	7.16375	10.4014	1.99051
PCSK5	-2.03735	0.565297	2.03735	0.565297	PCSK5	PCSK5	5125	proprotein convertase subtilisin/kexin type 5	PCSK5	0.0352662	2.97105	0.148847	0.804091	PCSK5	10.5804	16.5461	1.50316	5.19322	5.3277	0.476469	PCSK5	3.82491	0.0352662	29.2672	2.97105	4.13821	0.148847	6.51719	0.804091	PCSK5	133.063	957.896	133.485	216.966
CEP85L	-2.02778	0.00826515	2.02778	0.00826515	CEP85L	CEP85L	387119	centrosomal protein 85kDa-like	CEP85L	0.108463	-0.0399494	-0.929085	-1.0422	CEP85L	1.31883	1.32058	0.0342568	0.650383	0.650883	-0.985641	CEP85L	1.38844	0.108463	1.25271	-0.0399494	0.676385	-0.929085	0.62538	-1.0422	CEP85L	42.0198	58.3334	21.6697	19.9051
MIR3648	-2.01724	0.245018	2.01724	0.245018	MIR3648	MIR3648	100500862	microRNA 3648	MIR3648	-0.209229	0.948984	-0.416162	-0.868844	MIR3648	98.3096	106.337	0.369877	48.7348	49.3358	-0.642503	MIR3648	65.8063	-0.209229	146.867	0.948984	57.0131	-0.416162	41.6585	-0.868844	MIR3648	11.0052	24.5614	9.53465	6.9668
HIST1H2BN	-2.01723	0.634754	2.01723	0.634754	HIST1H2BN	HIST1H2BN	8341	histone cluster 1, H2bn	HIST1H2BN	1.97935	-0.57293	0.994813	-1.61315	HIST1H2BN	2.00967	2.84851	0.70321	0.996252	1.43166	-0.309169	HIST1H2BN	4.86723	1.97935	0.829792	-0.57293	2.45984	0.994813	0.403489	-1.61315	HIST1H2BN	12.0056	2.04679	6.0675	0.995257
GAB1	-2.01518	0.0511339	2.01518	0.0511339	GAB1	GAB1	2549	GRB2-associated binding protein 1	GAB1	0.881301	0.477869	-0.205362	-0.457281	GAB1	1.02672	1.03677	0.679585	0.509491	0.511435	-0.331321	GAB1	1.18079	0.881301	0.892745	0.477869	0.555974	-0.205362	0.466895	-0.457281	GAB1	92.0433	69.5907	43.3393	36.8245
ATRNL1	-2.01041	0.16207	2.01041	0.16207	ATRNL1	ATRNL1	26033	attractin-like 1	ATRNL1	0.385326	-0.237343	-0.58943	-1.27756	ATRNL1	0.581915	0.595518	0.0739914	0.289451	0.297722	-0.933496	ATRNL1	0.722072	0.385326	0.468963	-0.237343	0.367409	-0.58943	0.228035	-1.27756	ATRNL1	63.0296	40.9357	32.0711	19.9051
FAM201A	-2.00687	0.149124	2.00687	0.149124	FAM201A	FAM201A	158228	family with sequence similarity 201, member A	FAM201A	0.474585	1.11299	0.0898686	-0.51219	FAM201A	5.53726	5.67335	0.793787	2.75915	2.81944	-0.211161	FAM201A	4.43819	0.474585	6.90851	1.11299	3.39934	0.0898686	2.23953	-0.51219	FAM201A	69.0325	107.456	52.874	34.834
NR0B1	-1.99798	0.337184	1.99798	0.337184	NR0B1	NR0B1	190	nuclear receptor subfamily 0, group B, member 1	NR0B1	-0.352452	1.22992	-0.458454	-0.66116	NR0B1	8.47237	9.77866	0.438734	4.24047	4.25094	-0.559807	NR0B1	4.89592	-0.352452	14.6614	1.22992	4.54909	-0.458454	3.95279	-0.66116	NR0B1	69.0325	206.725	64.1422	55.7344
LOC100216546	-1.99707	0.196602	1.99707	0.196602	LOC100216546	LOC100216546	100216546	uncharacterized LOC100216546	LOC100216546	0.56769	-0.016298	-0.288331	-1.15605	LOC100216546	0.597759	0.610044	0.275696	0.299317	0.312955	-0.722192	LOC100216546	0.731855	0.56769	0.488233	-0.016298	0.404331	-0.288331	0.221578	-1.15605	LOC100216546	69.0325	46.0527	38.1386	20.9004
CPT1B	-1.99115	0.319788	1.99115	0.319788	CPT1B	CPT1B	1375	carnitine palmitoyltransferase 1B (muscle)	CPT1B	0.264384	0.368776	0.0782994	-1.43234	CPT1B	16.5775	16.5884	0.31658	8.32563	9.49297	-0.67702	CPT1B	15.9885	0.264384	17.1883	0.368776	14.0537	0.0782994	4.93223	-1.43234	CPT1B	417.195	438.012	362.317	124.852
RNF39	-1.98905	0.203829	1.98905	0.203829	RNF39	RNF39	80352	ring finger protein 39	RNF39	0.742625	0.0381559	-0.201493	-1.00189	RNF39	0.390095	0.40178	0.39039	0.196121	0.203715	-0.60169	RNF39	0.497971	0.742625	0.305589	0.0381559	0.258819	-0.201493	0.148612	-1.00189	RNF39	10.0046	6.13952	5.19988	2.98573
HCG27	-1.98902	0.100244	1.98902	0.100244	HCG27	HCG27	253018	HLA complex group 27 (non-protein coding)	HCG27	0.86228	0.216889	-0.344649	-0.560297	HCG27	0.413345	0.423728	0.539585	0.207813	0.208394	-0.452473	HCG27	0.516956	0.86228	0.3305	0.216889	0.22394	-0.344649	0.192848	-0.560297	HCG27	8.00376	5.11697	3.46714	2.98577
VAX1	-1.98261	0.240206	1.98261	0.240206	VAX1	VAX1	11023	ventral anterior homeobox 1	VAX1	0.447388	-0.300591	-1.37993	-0.448079	VAX1	0.658524	0.680774	0.0733987	0.332149	0.349622	-0.914005	VAX1	0.853402	0.447388	0.508147	-0.300591	0.240478	-1.37993	0.458766	-0.448079	VAX1	19.0089	11.2573	4.33393	8.95731
LOC100289495	-1.97905	0.375187	1.97905	0.375187	LOC100289495	LOC100289495	100289495	uncharacterized LOC100289495	LOC100289495	1.2885	-0.389315	-0.766428	-0.304004	LOC100289495	0.531444	0.623852	0.449591	0.268535	0.271991	-0.535216	LOC100289495	0.95059	1.2885	0.297113	-0.389315	0.22877	-0.766428	0.315212	-0.304004	LOC100289495	36.0169	11.2573	8.66786	11.9431
MSH5-SAPCD1	-1.97883	0.315806	1.97883	0.315806	MSH5-SAPCD1	MSH5-SAPCD1	100532732	MSH5-SAPCD1 readthrough (non-protein coding)	MSH5-SAPCD1	0.0613933	1.00564	0.121486	-1.02374	MSH5-SAPCD1	4.35686	4.59224	0.533516	2.20174	2.37745	-0.451129	MSH5-SAPCD1	3.14087	0.0613933	6.04361	1.00564	3.27446	0.121486	1.48044	-1.02374	MSH5-SAPCD1	123.893	238.394	129.163	58.397
C10orf25	-1.97728	0.304561	1.97728	0.304561	C10orf25	C10orf25	220979	chromosome 10 open reading frame 25	C10orf25	0.793747	0.22853	-1.13308	0.188314	C10orf25	1.49731	1.52612	0.511138	0.757254	0.83806	-0.472381	C10orf25	1.82131	0.793747	1.23094	0.22853	0.479019	-1.13308	1.1971	0.188314	C10orf25	56.0263	37.8655	14.7354	36.8245
ANKRD18A	-1.97399	0.145792	1.97399	0.145792	ANKRD18A	ANKRD18A	253650	ankyrin repeat domain 18A	ANKRD18A	0.640263	0.976724	0.214689	-0.559924	ANKRD18A	1.99041	2.00395	0.808494	1.00832	1.04487	-0.172618	ANKRD18A	1.77133	0.640263	2.23658	0.976724	1.31883	0.214689	0.770916	-0.559924	ANKRD18A	64.0301	80.848	47.6732	27.8672
SEC31B	-1.97316	0.47721	1.97316	0.47721	SEC31B	SEC31B	25956	SEC31 homolog B (S. cerevisiae)	SEC31B	1.2498	0.315301	0.8315	-1.22742	SEC31B	9.06639	9.54606	0.782549	4.59485	5.81514	-0.19796	SEC31B	12.534	1.2498	6.55811	0.315301	9.37929	0.8315	2.25099	-1.22742	SEC31B	565.266	295.761	422.992	101.516
ANKRD36B	-1.96805	0.270673	1.96805	0.270673	ANKRD36B	ANKRD36B	57730	ankyrin repeat domain 36B	ANKRD36B	-0.107388	0.365118	-0.244602	-1.4512	ANKRD36B	2.01163	2.03866	0.128865	1.02214	1.11283	-0.847903	ANKRD36B	1.70777	-0.107388	2.36956	0.365118	1.55283	-0.244602	0.672822	-1.4512	ANKRD36B	101.048	140.205	91.8793	39.8103
LOC401320	-1.96725	0.374546	1.96725	0.374546	LOC401320	LOC401320	401320	uncharacterized LOC401320	LOC401320	0.7867	0.122779	0.273113	-1.31599	LOC401320	0.995914	1.02239	0.45474	0.506248	0.584985	-0.521439	LOC401320	1.25358	0.7867	0.79121	0.122779	0.878106	0.273113	0.291863	-1.31599	LOC401320	47.0221	29.6784	32.9379	10.9478
ANKH	-1.96491	0.375288	1.96491	0.375288	ANKH	ANKH	56172	ankylosis, progressive homolog (mouse)	ANKH	-0.331991	-0.626782	-0.605283	-2.30241	ANKH	0.491301	0.493867	-0.479387	0.250038	0.29455	-1.45385	ANKH	0.544149	-0.331991	0.443585	-0.626782	0.450245	-0.605283	0.138855	-2.30241	ANKH	44.5732	36.3356	36.8812	11.3741
FBXL8	-1.96259	0.511905	1.96259	0.511905	FBXL8	FBXL8	55336	F-box and leucine-rich repeat protein 8	FBXL8	1.12181	0.573919	1.07418	-1.32397	FBXL8	2.0441	2.08106	0.847865	1.04153	1.42246	-0.124895	FBXL8	2.47154	1.12181	1.69058	0.573919	2.39128	1.07418	0.453642	-1.32397	FBXL8	35.203	24.0796	34.0598	6.46139
HIST1H2BD	-1.96193	0.28012	1.96193	0.28012	HIST1H2BD	HIST1H2BD	3017	histone cluster 1, H2bd	HIST1H2BD	1.15342	-0.135824	-0.308979	-0.617966	HIST1H2BD	2.24094	2.46839	0.508798	1.14221	1.14877	-0.463472	HIST1H2BD	3.50333	1.15342	1.43344	-0.135824	1.27132	-0.308979	1.02622	-0.617966	HIST1H2BD	10.0047	4.09357	4.33393	3.98103
TRIM69	-1.95858	0.388805	1.95858	0.388805	TRIM69	TRIM69	140691	tripartite motif containing 69	TRIM69	0.967436	-0.584845	-0.346988	-1.21003	TRIM69	0.303288	0.348246	0.191296	0.154851	0.16183	-0.77851	TRIM69	0.519394	0.967436	0.177098	-0.584845	0.208841	-0.346988	0.114819	-1.21003	TRIM69	9.00423	3.07018	2.60036	1.99051
IKZF4	-1.95517	0.452564	1.95517	0.452564	IKZF4	IKZF4	64375	IKAROS family zinc finger 4 (Eos)	IKZF4	1.13246	0.74193	0.997084	-1.05728	IKZF4	0.960239	0.969048	0.937194	0.491129	0.620961	-0.0300979	IKZF4	1.09941	1.13246	0.838685	0.74193	1.00094	0.997084	0.240981	-1.05728	IKZF4	59.0278	45.0293	53.7407	12.9383
KLRAP1	-1.95318	0.206797	1.95318	0.206797	KLRAP1	KLRAP1	10748	killer cell lectin-like receptor subfamily A pseudogene 1	KLRAP1	0.576844	0.346491	0.0073439	-1.01566	KLRAP1	0.811852	0.814441	0.461668	0.415657	0.442056	-0.504157	KLRAP1	0.879323	0.576844	0.749558	0.346491	0.592532	0.0073439	0.29158	-1.01566	KLRAP1	18.0085	15.3509	12.135	5.97154
PLEKHN1	-1.94891	0.178267	1.94891	0.178267	PLEKHN1	PLEKHN1	84069	pleckstrin homology domain containing, family N member 1	PLEKHN1	0.287693	0.664602	-0.919341	-0.0536936	PLEKHN1	0.320084	0.322819	0.476147	0.164238	0.171684	-0.486517	PLEKHN1	0.280888	0.287693	0.364749	0.664602	0.121669	-0.919341	0.2217	-0.0536936	PLEKHN1	6.00282	8.18714	2.60036	4.97628
FLJ37201	-1.94481	0.37952	1.94481	0.37952	FLJ37201	FLJ37201	283011	tigger transposable element derived 2 pseudogene	FLJ37201	-0.372967	1.19577	-0.201386	-0.895079	FLJ37201	0.48718	0.560974	0.4114	0.250502	0.257777	-0.548232	FLJ37201	0.28286	-0.372967	0.839088	1.19577	0.318583	-0.201386	0.19697	-0.895079	FLJ37201	10.0047	29.6784	11.2682	6.9668
C20orf54	-1.94329	0.549811	1.94329	0.549811	C20orf54	SLC52A3	113278	solute carrier family 52, riboflavin transporter, member 3	C20orf54	-1.04238	1.06069	-0.11181	-1.78689	C20orf54	0.407135	0.520153	0.0091542	0.209508	0.245815	-0.949349	C20orf54	0.196424	-1.04238	0.843882	1.06069	0.37439	-0.11181	0.11724	-1.78689	C20orf54	5.00235	21.4913	9.53465	2.98577
LOC100506368	-1.94206	0.157572	1.94206	0.157572	LOC100506368	LOC100506368	100506368	uncharacterized LOC100506368	LOC100506368	0.120768	0.912438	-0.616679	-0.265284	LOC100506368	1.66956	1.7328	0.516603	0.859688	0.866071	-0.440982	LOC100506368	1.26895	0.120768	2.19665	0.912438	0.761116	-0.616679	0.971027	-0.265284	LOC100506368	13.0061	22.5146	7.80107	9.95257
ZNF493	-1.93623	0.073091	1.93622	0.073091	ZNF493	ZNF493	284443	zinc finger protein 493	ZNF493	0.00164159	0.487827	-0.584478	-0.832547	ZNF493	0.997485	1.01168	0.244734	0.51517	0.517075	-0.708513	ZNF493	0.842807	0.00164159	1.18055	0.487827	0.561421	-0.584478	0.472729	-0.832547	ZNF493	40.0188	50.1463	26.0036	21.8956
COL27A1	-1.93354	0.444903	1.93354	0.444903	COL27A1	COL27A1	85301	collagen, type XXVII, alpha 1	COL27A1	0.527209	-0.333191	0.0572481	-1.76573	COL27A1	1.0522	1.09933	0.0970094	0.544183	0.656454	-0.854239	COL27A1	1.41776	0.527209	0.780902	-0.333191	1.0236	0.0572481	0.289308	-1.76573	COL27A1	78.0367	42.9825	56.3411	15.9241
ATG14	-1.93089	0.376043	1.93089	0.376043	ATG14	ATG14	22863	autophagy related 14	ATG14	0.341139	0.248289	0.184833	-1.49394	ATG14	5.25699	5.25971	0.294714	2.72258	3.19653	-0.654551	ATG14	5.42891	0.341139	5.09052	0.248289	4.87147	0.184833	1.5216	-1.49394	ATG14	252.119	236.404	226.231	70.6632
AMH	-1.92289	0.191878	1.92289	0.191878	AMH	AMH	268	anti-Mullerian hormone	AMH	-0.0622446	0.707404	-0.323619	-0.917779	AMH	1.90299	1.9711	0.32258	0.989651	1.01071	-0.620699	AMH	1.45745	-0.0622446	2.48474	0.707404	1.21594	-0.323619	0.805475	-0.917779	AMH	27.0127	46.0527	22.5364	14.9288
MYL5	-1.92142	0.576635	1.92142	0.576635	MYL5	MYL5	4636	myosin, light chain 5, regulatory	MYL5	0.0278893	0.580016	0.760432	-2.03687	MYL5	5.43584	5.53566	0.303952	2.82907	4.26601	-0.63822	MYL5	4.48914	0.0278893	6.58218	0.580016	7.459	0.760432	1.07302	-2.03687	MYL5	20.819	30.5258	34.5922	4.97628
RNF150	-1.92117	0.227307	1.92117	0.227307	RNF150	RNF150	57484	ring finger protein 150	RNF150	0.215705	0.604529	-0.0203704	-1.04337	RNF150	1.25525	1.26666	0.410117	0.653377	0.694874	-0.531871	RNF150	1.097	0.215705	1.43633	0.604529	0.93141	-0.0203704	0.458339	-1.04337	RNF150	50.0235	65.4972	42.4725	20.9004
AMT	-1.92047	0.424044	1.92047	0.424044	AMT	AMT	275	aminomethyltransferase	AMT	1.32351	0.00288623	0.397593	-0.954114	AMT	2.14672	2.37553	0.6632	1.11781	1.24273	-0.278261	AMT	3.39274	1.32351	1.35832	0.00288623	1.78575	0.397593	0.699707	-0.954114	AMT	68.7896	25.8983	33.3901	13.0837
HAP1	-1.91998	0.448928	1.91998	0.448928	HAP1	HAP1	9001	huntingtin-associated protein 1	HAP1	0.654712	-0.00836559	0.333636	-1.56948	HAP1	2.27329	2.33358	0.323173	1.18402	1.45103	-0.617922	HAP1	2.86061	0.654712	1.80656	-0.00836559	2.28984	0.333636	0.612224	-1.56948	HAP1	108.051	67.5439	85.8118	22.8909
FZD3	-1.91681	0.219029	1.91681	0.219029	FZD3	FZD3	7976	frizzled family receptor 3	FZD3	-0.551607	0.509538	-0.976406	-0.943072	FZD3	1.11578	1.19208	-0.0210346	0.582101	0.58214	-0.959739	FZD3	0.772429	-0.551607	1.61174	0.509538	0.575415	-0.976406	0.588865	-0.943072	FZD3	107.05	224.123	79.7443	81.611
FAM120C	-1.91179	0.125149	1.91179	0.125149	FAM120C	FAM120C	54954	family with sequence similarity 120C	FAM120C	0.191029	0.73226	-0.226807	-0.719758	FAM120C	2.79521	2.84452	0.461644	1.46209	1.48348	-0.473282	FAM120C	2.31713	0.191029	3.37192	0.73226	1.73448	-0.226807	1.23247	-0.719758	FAM120C	119.056	199.562	96.2133	86.5873
ZNF192	-1.91045	0.0418521	1.91045	0.0418521	ZNF192	ZNF192	7745	zinc finger protein 192	ZNF192	0.203347	0.187327	-0.541432	-0.935718	ZNF192	4.54306	4.54313	0.195337	2.37801	2.40025	-0.738575	ZNF192	4.56836	0.203347	4.51791	0.187327	2.72621	-0.541432	2.07428	-0.935718	ZNF192	241.113	238.451	143.886	109.478
CDKN2B	-1.91036	0.0395244	1.91036	0.0395244	CDKN2B	CDKN2B	1030	cyclin-dependent kinase inhibitor 2B (p15, inhibits CDK4)	CDKN2B	0.875178	0.505765	-0.193292	-0.293459	CDKN2B	0.68407	0.689684	0.690472	0.358084	0.358299	-0.243376	CDKN2B	0.777504	0.875178	0.601864	0.505765	0.370733	-0.193292	0.345866	-0.293459	CDKN2B	30.0141	22.5146	13.8686	12.9383
LOC254128	-1.90785	0.249332	1.90785	0.249332	LOC254128	LOC254128	254128	uncharacterized LOC254128	LOC254128	-0.0499569	0.930427	-0.181715	-0.801715	LOC254128	13.2411	14.0128	0.440235	6.94029	7.10113	-0.491715	LOC254128	9.42671	-0.0499569	18.5988	0.930427	8.60393	-0.181715	5.59833	-0.801715	LOC254128	113.53	233.035	104.288	69.8721
C15orf34	-1.90638	0.391412	1.90638	0.391412	C15orf34	HEXA-AS1	80072	HEXA antisense RNA 1	C15orf34	0.225286	1.02848	0.454454	-1.06236	C15orf34	0.888991	0.923656	0.626884	0.466323	0.532254	-0.303954	C15orf34	0.672983	0.225286	1.17433	1.02848	0.788843	0.454454	0.275666	-1.06236	C15orf34	17.008	29.6784	19.9361	6.9668
PLA2R1	-1.90517	0.121227	1.90517	0.121227	PLA2R1	PLA2R1	22925	phospholipase A2 receptor 1, 180kDa	PLA2R1	-0.0914229	0.622778	-0.665318	-0.66317	PLA2R1	0.769096	0.792777	0.265678	0.403688	0.403689	-0.664244	PLA2R1	0.600458	-0.0914229	0.985096	0.622778	0.403388	-0.665318	0.403989	-0.66317	PLA2R1	32.0151	52.193	21.6697	21.8956
EPB41L4A-AS1	-1.90417	0.151712	1.90417	0.151712	EPB41L4A-AS1	EPB41L4A-AS1	114915	EPB41L4A antisense RNA 1	EPB41L4A-AS1	0.260081	0.438618	-0.179511	-0.980116	EPB41L4A-AS1	9.90966	9.92864	0.349349	5.20419	5.40581	-0.579813	EPB41L4A-AS1	9.31508	0.260081	10.5422	0.438618	6.86841	-0.179511	3.94321	-0.980116	EPB41L4A-AS1	94.0442	106.433	69.3429	39.8103
MATL2963	-1.90275	0.472237	1.90275	0.472237	MATL2963	C1RL-AS1	283314	C1RL antisense RNA 1	MATL2963	-0.108253	1.48634	-0.931753	0.453671	MATL2963	0.380876	0.440534	0.689043	0.200171	0.223692	-0.239041	MATL2963	0.219166	-0.108253	0.661901	1.48634	0.123844	-0.931753	0.323541	0.453671	MATL2963	11.3653	34.3244	6.42223	16.778
MDK	-1.8998	0.398691	1.8998	0.398691	MDK	MDK	4192	midkine (neurite growth-promoting factor 2)	MDK	-0.687845	0.961367	-0.511962	-1.06621	MDK	29.7917	34.7921	0.136761	15.6815	15.9717	-0.789087	MDK	16.8215	-0.687845	52.7627	0.961367	19.0025	-0.511962	12.9409	-1.06621	MDK	112.053	348.977	125.684	85.5921
C8orf4	-1.8961	0.295337	1.8961	0.295337	C8orf4	C8orf4	56892	chromosome 8 open reading frame 4	C8orf4	-0.750027	-0.275893	-0.823038	-2.04895	C8orf4	18.1228	18.368	-0.51296	9.55793	10.4337	-1.43599	C8orf4	15.3766	-0.750027	21.3594	-0.275893	14.6178	-0.823038	6.24951	-2.04895	C8orf4	257.121	357.164	244.434	104.502
CLDN18	-1.89528	0.199106	1.89528	0.199106	CLDN18	CLDN18	51208	claudin 18	CLDN18	1.11535	0.147763	-0.229543	-0.35216	CLDN18	0.489105	0.516864	0.631557	0.258065	0.258298	-0.290852	CLDN18	0.683972	1.11535	0.349756	0.147763	0.269268	-0.229543	0.247328	-0.35216	CLDN18	22.0103	11.2573	8.66786	7.96205
DOK7	-1.89423	0.546283	1.89423	0.546283	DOK7	DOK7	285489	docking protein 7	DOK7	-2.1476	0.326053	-2.16189	-1.50288	DOK7	0.686539	0.954666	-0.910772	0.362436	0.37193	-1.83239	DOK7	0.291302	-2.1476	1.61803	0.326053	0.28843	-2.16189	0.455431	-1.50288	DOK7	7.00329	38.8889	6.93429	10.9478
LOC100130855	-1.89291	0.0650323	1.89291	0.0650323	LOC100130855	LOC100130855	100130855	uncharacterized LOC100130855	LOC100130855	0.66815	0.537347	-0.0796953	-0.556026	LOC100130855	2.00824	2.0103	0.602748	1.06092	1.07541	-0.31786	LOC100130855	2.10137	0.66815	1.91923	0.537347	1.25135	-0.0796953	0.899475	-0.556026	LOC100130855	32.5775	29.7538	19.3996	13.9445
RALGAPA1	-1.89104	0.0127639	1.89104	0.0127639	RALGAPA1	RALGAPA1	253959	Ral GTPase activating protein, alpha subunit 1 (catalytic)	RALGAPA1	0.368188	0.158503	-0.657333	-0.654337	RALGAPA1	1.1557	1.15875	0.263346	0.611143	0.611143	-0.655835	RALGAPA1	1.24281	0.368188	1.07469	0.158503	0.610509	-0.657333	0.611778	-0.654337	RALGAPA1	97.0456	83.9182	47.6732	47.7723
SMAD5-AS1	-1.88819	0.27831	1.88819	0.27831	SMAD5-AS1	SMAD5-AS1	9597	SMAD5 antisense RNA 1	SMAD5-AS1	0.708099	-0.257315	-1.08379	-0.299438	SMAD5-AS1	0.262038	0.276842	0.225392	0.138777	0.143936	-0.691616	SMAD5-AS1	0.366162	0.708099	0.187523	-0.257315	0.105745	-1.08379	0.182127	-0.299438	SMAD5-AS1	6.00282	3.07423	1.73357	2.98577
C17orf69	-1.88509	0.15648	1.88509	0.15648	C17orf69	CRHR1-IT1	147081	CRHR1 intronic transcript 1 (non-protein coding)	C17orf69	0.3594	0.303435	-0.172364	-0.994066	C17orf69	3.32158	3.3222	0.331417	1.76203	1.83396	-0.583215	C17orf69	3.38663	0.3594	3.25777	0.303435	2.34256	-0.172364	1.32536	-0.994066	C17orf69	43.0203	31.7253	29.4708	12.9384
ATP6V0A4	-1.88479	0.329432	1.88479	0.329432	ATP6V0A4	ATP6V0A4	50617	ATPase, H+ transporting, lysosomal V0 subunit a4	ATP6V0A4	0.638029	0.282043	0.238445	-1.14719	ATP6V0A4	0.733669	0.739259	0.460036	0.389257	0.43501	-0.45437	ATP6V0A4	0.830006	0.638029	0.648513	0.282043	0.629208	0.238445	0.240812	-1.14719	ATP6V0A4	24.0113	19.4445	18.2025	6.9668
LOC100130744	-1.8819	0.335022	1.8819	0.335022	LOC100130744	LOC100130744	100130744	uncharacterized LOC100130744	LOC100130744	-0.185489	1.18643	-0.644711	-0.178737	LOC100130744	0.81829	0.912542	0.500469	0.43482	0.440503	-0.411724	LOC100130744	0.508643	-0.185489	1.31644	1.18643	0.369976	-0.644711	0.511029	-0.178737	LOC100130744	12.4536	32.2317	9.0585	12.512
FKBP10	-1.88189	0.600154	1.88189	0.600154	FKBP10	FKBP10	60681	FK506 binding protein 10, 65 kDa	FKBP10	0.941738	0.0792152	1.01259	-1.816	FKBP10	39.5462	41.3263	0.510476	21.0141	31.9465	-0.401707	FKBP10	53.3246	0.941738	29.328	0.0792152	56.0087	1.01259	7.88434	-1.816	FKBP10	1460.69	803.364	1534.21	215.971
NDRG1	-1.88167	0.582611	1.88167	0.582611	NDRG1	NDRG1	10397	N-myc downstream regulated 1	NDRG1	1.34934	-0.166878	0.860992	-1.50256	NDRG1	3.17691	3.62572	0.591229	1.68835	2.28718	-0.320782	NDRG1	5.37302	1.34934	1.87842	-0.166878	3.83012	0.860992	0.744241	-1.50256	NDRG1	158.074	55.2632	112.682	21.8956
KAT6A	-1.88142	0.0760382	1.88142	0.0760382	KAT6A	KAT6A	7994	K(lysine) acetyltransferase 6A	KAT6A	0.118224	0.487729	-0.41622	-0.801468	KAT6A	2.73255	2.75499	0.302976	1.45239	1.46535	-0.608844	KAT6A	2.4041	0.118224	3.10588	0.487729	1.65985	-0.41622	1.27086	-0.801468	KAT6A	223.105	284.503	154.288	117.44
ARHGAP30	-1.88109	0.129588	1.88109	0.129588	ARHGAP30	ARHGAP30	257106	Rho GTPase activating protein 30	ARHGAP30	0.667932	0.601942	0.0864582	-0.639722	ARHGAP30	0.65668	0.656852	0.634937	0.349096	0.36021	-0.276632	ARHGAP30	0.671872	0.667932	0.641832	0.601942	0.448999	0.0864582	0.271421	-0.639722	ARHGAP30	29.0136	26.6082	18.2025	10.9478
AVIL	-1.88004	0.147395	1.88004	0.147395	AVIL	AVIL	10677	advillin	AVIL	0.059039	0.793161	-0.339542	-0.629785	AVIL	0.36372	0.375556	0.4261	0.193464	0.194443	-0.484664	AVIL	0.282014	0.059039	0.469098	0.793161	0.213937	-0.339542	0.17495	-0.629785	AVIL	8.04559	13.3829	6.10343	4.99115
LOC401321	-1.87742	0.00257966	1.87742	0.00257966	LOC401321	LOC401321	401321	uncharacterized LOC401321	LOC401321	0.568088	0.569743	-0.386075	-0.293599	LOC401321	1.03689	1.03689	0.568916	0.552297	0.552581	-0.339837	LOC401321	1.0363	0.568088	1.03749	0.569743	0.534877	-0.386075	0.570285	-0.293599	LOC401321	47.0221	47.0761	24.27	25.8767
PLAT	-1.876	0.521705	1.876	0.521705	PLAT	PLAT	5327	plasminogen activator, tissue	PLAT	-1.56004	0.666644	-1.74061	-0.968115	PLAT	4.7051	6.17705	-0.446698	2.50804	2.59847	-1.35436	PLAT	2.1748	-1.56004	10.1793	0.666644	1.91895	-1.74061	3.27798	-0.968115	PLAT	66.031	309.065	58.0747	99.5257
BNC1	-1.87586	0.285615	1.87586	0.285615	BNC1	BNC1	646	basonuclin 1	BNC1	0.115529	1.21234	-0.550833	0.0635963	BNC1	1.07064	1.14893	0.663936	0.570746	0.583735	-0.243618	BNC1	0.732077	0.115529	1.56578	1.21234	0.461277	-0.550833	0.706193	0.0635963	BNC1	33.0155	70.6141	20.8029	31.8482
PPP1R12B	-1.87536	0.175706	1.87536	0.175706	PPP1R12B	PPP1R12B	4660	protein phosphatase 1, regulatory subunit 12B	PPP1R12B	0.913394	0.0425533	-0.361918	-0.496472	PPP1R12B	1.88194	1.9683	0.477974	1.00351	1.0046	-0.429195	PPP1R12B	2.54495	0.913394	1.39165	0.0425533	1.05141	-0.361918	0.957783	-0.496472	PPP1R12B	101.048	75.7311	51.1404	88.5778
ZFHX2	-1.87449	0.335588	1.87449	0.335588	ZFHX2	ZFHX2	85446	zinc finger homeobox 2	ZFHX2	1.0251	-0.416126	-0.577746	-0.626275	ZFHX2	0.330325	0.372395	0.304487	0.176221	0.176246	-0.60201	ZFHX2	0.544336	1.0251	0.200454	-0.416126	0.17921	-0.577746	0.173282	-0.626275	ZFHX2	50.0235	18.4214	16.4691	15.9243
MGC21881	-1.87323	0.424171	1.87323	0.424171	MGC21881	MGC21881	389741	uncharacterized locus MGC21881	MGC21881	0.275746	0.805926	0.504915	-1.23429	MGC21881	0.841109	0.855348	0.540836	0.449016	0.533085	-0.36469	MGC21881	0.699926	0.275746	1.01077	0.805926	0.820425	0.504915	0.245745	-1.23429	MGC21881	17.008	24.5614	19.9361	5.97154
C1orf21	-1.87099	0.336832	1.87099	0.336832	C1orf21	C1orf21	81563	chromosome 1 open reading frame 21	C1orf21	-0.0192952	1.27497	0.042591	-0.594518	C1orf21	1.25732	1.38594	0.627838	0.672008	0.688457	-0.275964	C1orf21	0.802859	-0.0192952	1.96903	1.27497	0.838048	0.042591	0.538865	-0.594518	C1orf21	83.039	203.655	86.6786	55.7344
TTC21B	-1.86986	0.109079	1.86986	0.109079	TTC21B	TTC21B	79809	tetratricopeptide repeat domain 21B	TTC21B	-0.118608	0.530549	-0.720986	-0.672934	TTC21B	7.36082	7.5479	0.20597	3.93656	3.93711	-0.69696	TTC21B	5.87785	-0.118608	9.21795	0.530549	3.87155	-0.720986	4.00267	-0.672934	TTC21B	317.149	497.369	208.896	215.971
TSSK6	-1.86587	0.257471	1.86587	0.257471	TSSK6	TSSK6	83983	testis-specific serine kinase 6	TSSK6	0.906563	-0.186286	-0.715405	-0.36401	TSSK6	1.30116	1.39561	0.360139	0.697347	0.702525	-0.539707	TSSK6	1.90029	0.906563	0.890922	-0.186286	0.617389	-0.715405	0.787661	-0.36401	TSSK6	24.0113	11.2573	7.80107	9.95257
PLEKHM1P	-1.86514	0.258346	1.86514	0.258346	PLEKHM1P	PLEKHM1P	440456	pleckstrin homology domain containing, family M (with RUN domain) member 1 pseudogene	PLEKHM1P	0.964418	-0.183471	-0.471994	-0.545621	PLEKHM1P	1.64446	1.77632	0.390474	0.881682	0.881969	-0.508807	PLEKHM1P	2.44792	0.964418	1.10471	-0.183471	0.90447	-0.471994	0.859469	-0.545621	PLEKHM1P	68.032	30.7018	25.1368	23.8862
DDTL	-1.86507	0.0604536	1.86507	0.0604536	DDTL	DDTL	100037417	D-dopachrome tautomerase-like	DDTL	0.609597	0.154991	-0.471812	-0.56206	DDTL	1.72356	1.745	0.382294	0.924128	0.92458	-0.516936	DDTL	2.01768	0.609597	1.47232	0.154991	0.953489	-0.471812	0.895671	-0.56206	DDTL	29.4824	21.5136	13.9324	13.0876
PLEKHM3	-1.86357	0.0680845	1.86357	0.0680845	PLEKHM3	PLEKHM3	389072	pleckstrin homology domain containing, family M, member 3	PLEKHM3	0.212261	0.659979	-0.357242	-0.566654	PLEKHM3	1.17674	1.19093	0.43612	0.631445	0.633108	-0.461948	PLEKHM3	1.00761	0.212261	1.37426	0.659979	0.678977	-0.357242	0.58724	-0.566654	PLEKHM3	99.0466	135.088	66.7425	57.7249
INO80B-WBP1	-1.86286	0.478578	1.86286	0.478578	INO80B-WBP1	INO80B-WBP1	100532735	INO80B-WBP1 readthrough	INO80B-WBP1	0.170134	0.092797	-1.80391	0.271807	INO80B-WBP1	3.8724	3.87379	0.131466	2.07874	2.64024	-0.766053	INO80B-WBP1	3.9776	0.170134	3.76999	0.092797	1.01245	-1.80391	4.26803	0.271807	INO80B-WBP1	77.5505	73.5029	19.7396	83.2131
PTAFR	-1.86061	0.370167	1.86061	0.370167	PTAFR	PTAFR	5724	platelet-activating factor receptor	PTAFR	-0.257418	1.2899	-0.271701	-0.487358	PTAFR	0.299695	0.34383	0.516242	0.161074	0.161524	-0.37953	PTAFR	0.175301	-0.257418	0.512359	1.2899	0.173574	-0.271701	0.149474	-0.487358	PTAFR	7.00329	20.4679	6.93429	5.97154
MYH3	-1.85814	0.0673832	1.85814	0.0673832	MYH3	MYH3	4621	myosin, heavy chain 3, skeletal muscle, embryonic	MYH3	0.232051	0.586664	-0.652952	-0.31605	MYH3	0.303188	0.30548	0.409358	0.163167	0.164281	-0.484501	MYH3	0.268125	0.232051	0.342836	0.586664	0.145186	-0.652952	0.183376	-0.31605	MYH3	16.0075	20.4679	8.66786	10.9478
TMEM27	-1.85443	0.317258	1.85443	0.317258	TMEM27	TMEM27	57393	transmembrane protein 27	TMEM27	0.729091	0.412622	0.335281	-0.975518	TMEM27	6.83832	6.87949	0.570856	3.68756	4.07467	-0.320118	TMEM27	7.63102	0.729091	6.12796	0.412622	5.8081	0.335281	2.34123	-0.975518	TMEM27	107.05	85.965	81.4779	32.8435
LOC730091	-1.85245	0.0492627	1.85245	0.0492627	LOC730091	LOC730091	730091	uncharacterized LOC730091	LOC730091	0.837256	0.751285	-0.295678	0.105346	LOC730091	1.15169	1.1522	0.794271	0.62171	0.627725	-0.0951661	LOC730091	1.18652	0.837256	1.11788	0.751285	0.541038	-0.295678	0.714411	0.105346	LOC730091	38.0179	35.8188	17.3357	22.8909
LOC100506599	-1.85168	0.436353	1.85168	0.436353	LOC100506599	LOC100506599	100506599	uncharacterized LOC100506599	LOC100506599	0.734302	0.873906	-1.00314	0.83368	LOC100506599	0.980561	0.981709	0.804104	0.529551	0.640525	-0.0847322	LOC100506599	0.934248	0.734302	1.02917	0.873906	0.280181	-1.00314	1.00087	0.83368	LOC100506599	26.0122	28.655	7.80107	27.8672
LOC100506990	-1.8471	0.146528	1.8471	0.146528	LOC100506990	LOC100506990	100506990	uncharacterized LOC100506990	LOC100506990	-0.203892	0.560524	-0.703274	-0.710613	LOC100506990	8.68863	8.99533	0.178316	4.70394	4.70395	-0.706943	LOC100506990	6.66646	-0.203892	11.3242	0.560524	4.71592	-0.703274	4.69199	-0.710613	LOC100506990	150.071	250.731	101.414	102.511
ADAMTSL4	-1.84533	0.18157	1.84533	0.18157	ADAMTSL4	ADAMTSL4	54507	ADAMTS-like 4	ADAMTSL4	0.400253	0.040384	-0.263349	-1.06377	ADAMTSL4	0.652114	0.657192	0.220319	0.353387	0.367071	-0.663559	ADAMTSL4	0.738736	0.400253	0.575649	0.040384	0.466364	-0.263349	0.267778	-1.06377	ADAMTSL4	29.0136	23.538	19.0693	10.9478
LOC100272228	-1.84387	0.554783	1.84387	0.554783	LOC100272228	LOC100272228	100272228	uncharacterized LOC100272228	LOC100272228	1.04643	0.263531	0.965026	-1.42055	LOC100272228	1.10197	1.14279	0.654979	0.597641	0.813806	-0.227761	LOC100272228	1.44547	1.04643	0.840105	0.263531	1.36617	0.965026	0.261442	-1.42055	LOC100272228	44.0207	25.5848	41.6057	7.96205
PKN3	-1.84	0.204708	1.84	0.204708	PKN3	PKN3	29941	protein kinase N3	PKN3	-0.0136921	0.932112	-0.385873	-0.455127	PKN3	9.88422	10.42	0.45921	5.37185	5.3734	-0.4205	PKN3	7.12172	-0.0136921	13.7183	0.932112	5.50234	-0.385873	5.24445	-0.455127	PKN3	231.109	445.176	178.558	170.189
GUCA1B	-1.83977	0.415866	1.83977	0.415866	GUCA1B	GUCA1B	2979	guanylate cyclase activator 1B (retina)	GUCA1B	-0.516162	1.16859	-0.360522	-0.746093	GUCA1B	0.594696	0.698983	0.326215	0.323245	0.326136	-0.553307	GUCA1B	0.331676	-0.516162	1.06629	1.16859	0.369459	-0.360522	0.282812	-0.746093	GUCA1B	7.00329	22.5146	7.80107	5.97154
RTEL1-TNFRSF6B	-1.83821	0.0613442	1.83821	0.0613442	RTEL1-TNFRSF6B	RTEL1-TNFRSF6B	100533107	RTEL1-TNFRSF6B readthrough (non-protein coding)	RTEL1-TNFRSF6B	0.601788	0.462601	-0.128812	-0.56341	RTEL1-TNFRSF6B	3.41586	3.41984	0.532194	1.85825	1.87937	-0.346111	RTEL1-TNFRSF6B	3.58468	0.601788	3.255	0.462601	2.16032	-0.128812	1.59842	-0.56341	RTEL1-TNFRSF6B	204.246	185.462	123.09	91.074
OSGIN1	-1.83776	0.275696	1.83776	0.275696	OSGIN1	OSGIN1	29948	oxidative stress induced growth inhibitor 1	OSGIN1	0.0384994	1.21884	-0.279665	-0.218883	OSGIN1	24.0331	26.0722	0.628671	13.0774	13.0803	-0.249274	OSGIN1	15.9643	0.0384994	36.18	1.21884	12.8048	-0.279665	13.3558	-0.218883	OSGIN1	283.133	641.667	227.098	236.871
EFEMP2	-1.83769	0.567017	1.83769	0.567017	EFEMP2	EFEMP2	30008	EGF containing fibulin-like extracellular matrix protein 2	EFEMP2	0.842188	-0.0340596	0.741973	-1.68963	EFEMP2	3.1326	3.27816	0.404064	1.70464	2.34663	-0.473827	EFEMP2	4.24417	0.842188	2.31215	-0.0340596	3.95936	0.741973	0.733906	-1.68963	EFEMP2	78.0367	42.9825	75.4104	13.9336
LOC646719	-1.83711	0.296014	1.83711	0.296014	LOC646719	LOC646719	646719	uncharacterized LOC646719	LOC646719	-0.092159	0.876202	-0.0887304	-0.882105	LOC646719	4.58555	4.84622	0.392021	2.49606	2.59102	-0.485418	LOC646719	3.27822	-0.092159	6.41422	0.876202	3.28602	-0.0887304	1.89601	-0.882105	LOC646719	172.081	336.696	172.49	99.5257
LOC401093	-1.83349	0.0608796	1.83349	0.0608796	LOC401093	LOC401093	401093	uncharacterized LOC401093	LOC401093	0.667403	0.302484	-0.255852	-0.523451	LOC401093	0.298055	0.300442	0.484943	0.162561	0.163261	-0.389651	LOC401093	0.338238	0.667403	0.262646	0.302484	0.178359	-0.255852	0.148163	-0.523451	LOC401093	22.303	17.3153	11.7615	9.76809
FAM86B1	-1.83192	0.155327	1.83192	0.155327	FAM86B1	FAM86B1	85002	family with sequence similarity 86, member B1	FAM86B1	-0.0891918	0.693002	-0.585637	-0.557264	FAM86B1	1.43522	1.48829	0.301905	0.783454	0.783492	-0.571451	FAM86B1	1.09443	-0.0891918	1.88214	0.693002	0.775788	-0.585637	0.791196	-0.557264	FAM86B1	22.0103	38.8889	15.6021	16.9194
ARPC4-TTLL3	-1.82955	0.199251	1.82955	0.199251	ARPC4-TTLL3	ARPC4-TTLL3	100526693	ARPC4-TTLL3 readthrough	ARPC4-TTLL3	1.15612	1.34798	0.831444	-0.0703174	ARPC4-TTLL3	3.36572	3.37317	1.25205	1.83965	1.93023	0.380564	ARPC4-TTLL3	3.1492	1.15612	3.59713	1.34798	2.51457	0.831444	1.34588	-0.0703174	ARPC4-TTLL3	121.868	139.202	97.309	52.0831
LOC286190	-1.82838	0.421738	1.82838	0.421738	LOC286190	LOC286190	286190	uncharacterized LOC286190	LOC286190	-0.412404	1.12779	-0.111314	-0.914429	LOC286190	0.342818	0.392829	0.357692	0.187499	0.194809	-0.512871	LOC286190	0.201021	-0.412404	0.584636	1.12779	0.247673	-0.111314	0.141944	-0.914429	LOC286190	7.21917	20.9958	8.89457	5.09759
MIR3064	-1.82703	0.142126	1.82703	0.142126	MIR3064	MIR3064	100616387	microRNA 3064	MIR3064	0.634143	-0.0701405	-0.479678	-0.695326	MIR3064	18254.7	18801.2	0.282001	9991.45	10019.4	-0.587502	MIR3064	23301.3	0.634143	14301.1	-0.0701405	10766.8	-0.479678	9271.93	-0.695326	MIR3064	30.0141	18.4211	13.8686	11.9431
LRG1	-1.82703	0.164727	1.82703	0.164727	LRG1	LRG1	116844	leucine-rich alpha-2-glycoprotein 1	LRG1	0.245983	0.126661	-0.282877	-1.08348	LRG1	0.596351	0.596861	0.186322	0.326404	0.33905	-0.68318	LRG1	0.621529	0.245983	0.572192	0.126661	0.430783	-0.282877	0.247316	-1.08348	LRG1	10.0047	9.21054	6.93429	3.98103
PRSS36	-1.82297	0.0933481	1.82297	0.0933481	PRSS36	PRSS36	146547	protease, serine, 36	PRSS36	0.575929	0.386218	-0.11643	-0.654006	PRSS36	0.243494	0.24402	0.481074	0.13357	0.135895	-0.385218	PRSS36	0.260041	0.575929	0.227999	0.386218	0.160924	-0.11643	0.110865	-0.654006	PRSS36	7.00329	6.14036	4.33393	2.98577
ZNF577	-1.81987	0.0759762	1.81987	0.0759762	ZNF577	ZNF577	84765	zinc finger protein 577	ZNF577	0.0655195	-0.430825	-0.998647	-1.09432	ZNF577	2.24242	2.27568	-0.182652	1.23219	1.23287	-1.04648	ZNF577	2.66332	0.0655195	1.88803	-0.430825	1.27373	-0.998647	1.192	-1.09432	ZNF577	48.0226	28.655	23.4032	21.8956
LOC100130673	-1.81831	0.118211	1.81831	0.118211	LOC100130673	LOC100130673	100130673	phosphoribosyl pyrophosphate synthetase 2 pseudogene	LOC100130673	0.350277	-0.147557	-0.972131	-0.550345	LOC100130673	0.769535	0.781017	0.10136	0.423214	0.427744	-0.761238	LOC100130673	0.914449	0.350277	0.647585	-0.147557	0.365658	-0.972131	0.48983	-0.550345	LOC100130673	13.0061	9.21054	5.20072	6.9668
GSDMB	-1.81526	0.556604	1.81526	0.556604	GSDMB	GSDMB	55876	gasdermin B	GSDMB	-0.204171	1.17193	0.642715	-1.39532	GSDMB	1.51293	1.68828	0.483877	0.833451	1.05014	-0.376302	GSDMB	0.939067	-0.204171	2.43749	1.17193	1.68902	0.642715	0.411268	-1.39532	GSDMB	13.0061	34.7954	24.27	5.97154
RAD51L3-RFFL	-1.81161	0.203304	1.81161	0.203304	RAD51L3-RFFL	RAD51L3-RFFL	100529207	RAD51L3-RFFL readthrough	RAD51L3-RFFL	0.546141	1.44757	0.230828	0.0483301	RAD51L3-RFFL	3.00433	3.15213	0.996853	1.65837	1.66169	0.139579	RAD51L3-RFFL	2.19821	0.546141	4.10606	1.44757	1.76665	0.230828	1.55673	0.0483301	RAD51L3-RFFL	83.1981	155.407	66.8642	58.9192
NRG4	-1.80535	0.496545	1.80535	0.496545	NRG4	NRG4	145957	neuregulin 4	NRG4	-0.287755	1.04978	-1.26022	0.317688	NRG4	1.33828	1.48466	0.381015	0.741286	0.85492	-0.471266	NRG4	0.841837	-0.287755	2.12749	1.04978	0.429029	-1.26022	1.28081	0.317688	NRG4	17.008	42.9825	8.66786	25.8767
ANKRD31	-1.79989	0.104108	1.79989	0.104108	ANKRD31	ANKRD31	256006	ankyrin repeat domain 31	ANKRD31	0.559518	0.904792	0.126316	-0.357818	ANKRD31	1.17146	1.17986	0.732155	0.650851	0.660034	-0.115751	ANKRD31	1.03934	0.559518	1.32037	0.904792	0.769752	0.126316	0.550316	-0.357818	ANKRD31	62.0292	78.8013	45.9397	32.8435
TMOD1	-1.79682	0.456887	1.79682	0.456887	TMOD1	TMOD1	7111	tropomodulin 1	TMOD1	-1.01393	0.771346	-0.727144	-1.20633	TMOD1	6.29106	7.53417	-0.121294	3.50123	3.54962	-0.966738	TMOD1	3.38854	-1.01393	11.6798	0.771346	4.13376	-0.727144	2.96548	-1.20633	TMOD1	105.937	367.234	129.235	94.6413
NFKBIA	-1.79521	0.270757	1.79521	0.270757	NFKBIA	NFKBIA	4792	nuclear factor of kappa light polypeptide gene enhancer in B-cells inhibitor, alpha	NFKBIA	-0.219023	-0.193162	-0.490313	-1.61018	NFKBIA	61.516	61.5184	-0.206092	34.2667	36.8801	-1.05025	NFKBIA	60.9671	-0.219023	62.0698	-0.193162	50.516	-0.490313	23.2442	-1.61018	NFKBIA	848.399	863.744	702.964	323.458
HOXD-AS2	-1.79485	0.436004	1.79485	0.436004	HOXD-AS2	HOXD-AS2	100506783	HOXD cluster antisense RNA 2	HOXD-AS2	-0.647529	1.04812	-0.85446	-0.43267	HOXD-AS2	4.36066	5.13557	0.200296	2.42955	2.45555	-0.643565	HOXD-AS2	2.42288	-0.647529	7.84826	1.04812	2.09913	-0.85446	2.81197	-0.43267	HOXD-AS2	12.0056	38.8889	10.4014	13.9336
BTBD8	-1.7945	0.227051	1.7945	0.227051	BTBD8	BTBD8	284697	BTB (POZ) domain containing 8	BTBD8	0.226627	0.393609	-1.01593	-0.0510015	BTBD8	3.42586	3.4316	0.310118	1.90909	2.01684	-0.533464	BTBD8	3.23323	0.226627	3.62997	0.393609	1.36644	-1.01593	2.66724	-0.0510015	BTBD8	41.0193	46.0527	17.3357	33.8387
FOXO1	-1.79431	0.264504	1.79431	0.264504	FOXO1	FOXO1	2308	forkhead box O1	FOXO1	0.435152	-0.0686689	-0.171954	-1.14841	FOXO1	2.38866	2.42517	0.183242	1.33125	1.40821	-0.660184	FOXO1	2.84438	0.435152	2.00596	-0.0686689	1.86737	-0.171954	0.949045	-1.14841	FOXO1	161.076	113.597	105.748	53.7439
ACVR1B	-1.78823	0.419115	1.78823	0.419115	ACVR1B	ACVR1B	91	activin A receptor, type IB	ACVR1B	0.489739	0.365684	0.417727	-1.23936	ACVR1B	3.36722	3.37033	0.427711	1.883	2.20215	-0.410817	ACVR1B	3.51515	0.489739	3.22552	0.365684	3.344	0.417727	1.06031	-1.23936	ACVR1B	155.073	143.275	149.087	46.7771
ANKRD13B	-1.78284	0.334384	1.78284	0.334384	ANKRD13B	ANKRD13B	124930	ankyrin repeat domain 13B	ANKRD13B	-0.316431	0.865117	-0.857098	-0.262568	ANKRD13B	4.56562	4.95379	0.274343	2.56087	2.61543	-0.559833	ANKRD13B	3.03151	-0.316431	6.87607	0.865117	2.08402	-0.857098	3.14683	-0.262568	ANKRD13B	92.0433	208.772	63.2754	95.5446
SYCP2L	-1.78077	0.513728	1.78077	0.513728	SYCP2L	SYCP2L	221711	synaptonemal complex protein 2-like	SYCP2L	-0.460114	0.650573	0.163034	-1.63758	SYCP2L	0.442366	0.475546	0.0952294	0.248413	0.298373	-0.737271	SYCP2L	0.301028	-0.460114	0.650065	0.650573	0.463653	0.163034	0.133093	-1.63758	SYCP2L	9.00423	19.4445	13.8686	3.98103
LOC728739	-1.77904	0.611127	1.77904	0.611127	LOC728739	LOC728739	728739	programmed cell death 2 pseudogene	LOC728739	-0.0364355	-0.0037598	-2.24337	0.540985	LOC728739	1.90997	1.91009	-0.0200977	1.0736	1.61347	-0.851193	LOC728739	1.88846	-0.0364355	1.93172	-0.0037598	0.409029	-2.24337	2.81792	0.540985	LOC728739	8.00376	8.18714	1.73357	11.9431
MIR570	-1.77903	0.124601	1.77903	0.124601	MIR570	MIR570	693155	microRNA 570	MIR570	0.0542806	0.671926	-0.567687	-0.368295	MIR570	848.812	868.333	0.363103	477.119	478.259	-0.467991	MIR570	685.246	0.0542806	1051.42	0.671926	445.262	-0.567687	511.256	-0.368295	MIR570	4.00188	6.14036	2.60036	2.98577
LOC100302640	-1.77903	0.186402	1.77903	0.186402	LOC100302640	LOC100302640	100302640	uncharacterized LOC100302640	LOC100302640	1.25497	0.609579	0.369965	-0.167602	LOC100302640	3.16523	3.24474	0.932275	1.77919	1.81015	0.101182	LOC100302640	3.95865	1.25497	2.53084	0.609579	2.14355	0.369965	1.47676	-0.167602	LOC100302640	16.0075	10.2339	8.66786	5.97154
CLSTN3	-1.77903	0.263102	1.77903	0.263102	CLSTN3	CLSTN3	9746	calsyntenin 3	CLSTN3	0.230978	-0.491226	-0.560913	-1.36152	CLSTN3	0.541322	0.558368	-0.130124	0.304279	0.316068	-0.961216	CLSTN3	0.695278	0.230978	0.421457	-0.491226	0.401583	-0.560913	0.230552	-1.36152	CLSTN3	27.0127	16.3743	15.6021	8.95731
GOLGA8A	-1.77808	0.49288	1.77808	0.49288	GOLGA8A	GOLGA8A	23015	golgin A8 family, member A	GOLGA8A	1.00106	-0.309032	0.268435	-1.23705	GOLGA8A	9.11722	10.0733	0.346016	5.12755	5.84148	-0.484308	GOLGA8A	14.3566	1.00106	5.78993	-0.309032	8.63989	0.268435	3.04307	-1.23705	GOLGA8A	663.312	273.246	396.988	141.326
ZNF497	-1.77514	0.0265759	1.77514	0.0265759	ZNF497	ZNF497	162968	zinc finger protein 497	ZNF497	0.696321	0.438794	-0.211487	-0.309255	ZNF497	1.64388	1.65044	0.567557	0.926061	0.926592	-0.260371	ZNF497	1.79735	0.696321	1.50352	0.438794	0.957977	-0.211487	0.895208	-0.309255	ZNF497	59.9463	50.1463	32.7747	29.8577
ARHGAP5-AS1	-1.77285	0.181676	1.77285	0.181676	ARHGAP5-AS1	ARHGAP5-AS1	84837	ARHGAP5 antisense RNA 1	ARHGAP5-AS1	-0.00397666	0.787699	-0.326385	-0.542029	ARHGAP5-AS1	1.55752	1.61651	0.391861	0.878542	0.880996	-0.434207	ARHGAP5-AS1	1.18379	-0.00397666	2.04924	0.787699	0.946717	-0.326385	0.815276	-0.542029	ARHGAP5-AS1	13.0061	22.5146	10.4014	8.95731
FARP2	-1.77244	0.391836	1.77244	0.391836	FARP2	FARP2	9855	FERM, RhoGEF and pleckstrin domain protein 2	FARP2	-0.523625	0.728932	-1.15737	-0.2888	FARP2	3.22287	3.53133	0.102653	1.81832	1.90133	-0.723083	FARP2	2.08792	-0.523625	4.97475	0.728932	1.34567	-1.15737	2.45699	-0.2888	FARP2	82.0386	195.468	52.874	96.5399
ZC2HC1C	-1.77024	0.201596	1.77024	0.201596	ZC2HC1C	ZC2HC1C	79696	zinc finger, C2HC-type containing 1C	ZC2HC1C	-0.228507	0.515781	-0.44671	-0.913905	ZC2HC1C	2.16624	2.23871	0.143637	1.2237	1.23978	-0.680307	ZC2HC1C	1.67371	-0.228507	2.80371	0.515781	1.43878	-0.44671	1.04077	-0.913905	ZC2HC1C	32.0151	45.0293	26.0036	19.9051
C3	-1.76974	0.372422	1.76974	0.372422	C3	C3	718	complement component 3	C3	-1.11454	-2.47778	-2.38036	-2.85904	C3	0.622436	0.693208	-1.79616	0.35171	0.356561	-2.6197	C3	0.998351	-1.11454	0.388066	-2.47778	0.415176	-2.38036	0.297945	-2.85904	C3	50.0235	19.4445	20.8029	14.9288
TRAF1	-1.76953	0.137833	1.76953	0.137833	TRAF1	TRAF1	7185	TNF receptor-associated factor 1	TRAF1	0.523249	0.407606	-0.0207451	-0.695132	TRAF1	1.06213	1.06298	0.465427	0.600231	0.616701	-0.357938	TRAF1	1.10556	0.523249	1.0204	0.407606	0.75827	-0.0207451	0.475131	-0.695132	TRAF1	48.0226	44.0059	32.9379	19.9051
OR7D2	-1.76702	0.406657	1.76702	0.406657	OR7D2	OR7D2	162998	olfactory receptor, family 7, subfamily D, member 2	OR7D2	1.18799	0.142667	0.433568	-0.74555	OR7D2	0.428432	0.456856	0.665327	0.24246	0.262989	-0.155991	OR7D2	0.615486	1.18799	0.298226	0.142667	0.364851	0.433568	0.161126	-0.74555	OR7D2	19.0089	9.21054	11.2682	4.97628
LOC150776	-1.76644	0.139933	1.76644	0.139933	LOC150776	LOC150776	150776	sphingomyelin phosphodiesterase 4, neutral membrane (neutral sphingomyelinase-3) pseudogene	LOC150776	-0.0823269	0.454245	-0.419096	-0.850677	LOC150776	8.01977	8.15884	0.185959	4.54007	4.59096	-0.634886	LOC150776	6.65886	-0.0823269	9.65882	0.454245	5.27257	-0.419096	3.90934	-0.850677	LOC150776	244.115	354.094	193.293	143.317
LOC100132774	-1.76591	0.16755	1.76591	0.16755	LOC100132774				LOC100132774	0.0142025	0.685396	-0.66161	-0.279613	LOC100132774	2.44643	2.51292	0.349799	1.38537	1.39753	-0.470612	LOC100132774	1.93869	0.0142025	3.08715	0.685396	1.21358	-0.66161	1.58147	-0.279613	LOC100132774	26.8392	42.7385	16.8008	21.8938
MAMDC4	-1.76279	0.395759	1.76279	0.395759	MAMDC4	MAMDC4	158056	MAM domain containing 4	MAMDC4	-0.1296	1.07301	0.1229	-0.815214	MAMDC4	0.343497	0.373767	0.471704	0.19486	0.20525	-0.346157	MAMDC4	0.226419	-0.1296	0.521115	1.07301	0.269726	0.1229	0.140774	-0.815214	MAMDC4	8.00376	18.4211	9.53465	4.97628
AKAP12	-1.76234	0.288639	1.76234	0.288639	AKAP12	AKAP12	9590	A kinase (PRKA) anchor protein 12	AKAP12	-0.310478	0.831756	-0.554721	-0.558989	AKAP12	23.7721	25.6593	0.260639	13.4889	13.489	-0.556855	AKAP12	16.0009	-0.310478	35.3176	0.831756	13.5089	-0.554721	13.469	-0.558989	AKAP12	1334.63	2955.56	1127.69	1124.64
FUK	-1.7609	0.234538	1.7609	0.234538	FUK	FUK	197258	fucokinase	FUK	0.575689	0.427129	0.164615	-0.794417	FUK	3.61252	3.61731	0.501409	2.05152	2.16589	-0.314901	FUK	3.80339	0.575689	3.43123	0.427129	2.86039	0.164615	1.47139	-0.794417	FUK	144.068	129.971	108.348	55.7344
DKFZP434I0714	-1.75823	0.134062	1.75823	0.134062	DKFZP434I0714	DKFZP434I0714	54553	uncharacterized protein DKFZP434I0714	DKFZP434I0714	0.179165	0.404494	-0.835119	-0.209463	DKFZP434I0714	2.11878	2.12524	0.291829	1.20507	1.23351	-0.522291	DKFZP434I0714	1.95961	0.179165	2.29087	0.404494	0.970152	-0.835119	1.49686	-0.209463	DKFZP434I0714	56.0263	65.4972	27.7372	42.796
LPAR2	-1.75806	0.376481	1.75806	0.376481	LPAR2	LPAR2	9170	lysophosphatidic acid receptor 2	LPAR2	-0.365801	0.804388	-0.172193	-1.01719	LPAR2	2.31036	2.50298	0.219294	1.31415	1.37091	-0.594692	LPAR2	1.5401	-0.365801	3.46586	0.804388	1.76129	-0.172193	0.98053	-1.01719	LPAR2	25.0118	56.2866	28.6039	15.9241
MLLT11	-1.75707	0.00987387	1.75707	0.00987387	MLLT11	MLLT11	10962	myeloid/lymphoid or mixed-lineage leukemia (trithorax homolog, Drosophila); translocated to, 11	MLLT11	0.461143	0.30538	-0.453604	-0.406211	MLLT11	2.32607	2.32946	0.383262	1.32384	1.32401	-0.429908	MLLT11	2.45509	0.461143	2.20383	0.30538	1.30227	-0.453604	1.34576	-0.406211	MLLT11	49.023	44.0059	26.0036	26.8719
TGFB3	-1.75665	0.198952	1.75665	0.198952	TGFB3	TGFB3	7043	transforming growth factor, beta 3	TGFB3	-0.162724	0.400473	-0.369653	-1.01826	TGFB3	0.71854	0.732271	0.118875	0.409039	0.419417	-0.693956	TGFB3	0.591128	-0.162724	0.873415	0.400473	0.512141	-0.369653	0.326693	-1.01826	TGFB3	18.0085	26.6082	15.6021	9.95257
CCDC93	-1.75561	0.195063	1.75561	0.195063	CCDC93	CCDC93	54520	coiled-coil domain containing 93	CCDC93	-0.141252	0.669038	-0.425659	-0.670502	CCDC93	20.6159	21.4341	0.263893	11.7428	11.7852	-0.548081	CCDC93	15.5683	-0.141252	27.3	0.669038	12.7828	-0.425659	10.7875	-0.670502	CCDC93	1071.5	1878.95	879.788	742.461
LOC100506190	-1.75124	0.335484	1.75124	0.335484	LOC100506190	LOC100506190	100506190	uncharacterized LOC100506190	LOC100506190	-0.229037	0.964112	-0.201498	-0.680177	LOC100506190	5.25704	5.71295	0.367537	3.0019	3.04331	-0.440838	LOC100506190	3.4766	-0.229037	7.94929	0.964112	3.5436	-0.201498	2.54301	-0.680177	LOC100506190	68.032	155.556	69.3429	49.7628
BAI3	-1.75102	0.378331	1.75102	0.378331	BAI3	BAI3	577	brain-specific angiogenesis inhibitor 3	BAI3	0.0135853	1.09357	0.221691	-0.730918	BAI3	0.392476	0.420291	0.553579	0.224142	0.236469	-0.254613	BAI3	0.269935	0.0135853	0.570647	1.09357	0.311821	0.221691	0.161117	-0.730918	BAI3	15.0071	31.7252	17.3357	8.95731
CNTNAP3	-1.74844	0.473395	1.74844	0.473395	CNTNAP3	CNTNAP3	79937	contactin associated protein-like 3	CNTNAP3	1.48914	0.727142	1.13961	-0.535472	CNTNAP3	1.27006	1.31461	1.10814	0.726395	0.852279	0.30207	CNTNAP3	1.65393	1.48914	0.975287	0.727142	1.29807	1.13961	0.406488	-0.535472	CNTNAP3	85.04	50.1463	66.7425	20.9004
LOC100131564	-1.74774	0.531973	1.74774	0.531973	LOC100131564	LOC100131564	100131564	uncharacterized LOC100131564	LOC100131564	0.739538	-0.0677375	0.527229	-1.46641	LOC100131564	10.3688	10.7772	0.3359	5.93267	7.40604	-0.46959	LOC100131564	13.7162	0.739538	7.83826	-0.0677375	11.8392	0.527229	2.97288	-1.46641	LOC100131564	537.253	307.018	463.731	116.445
LOC285540	-1.74698	0.180989	1.74698	0.180989	LOC285540	LOC285540	285540	uncharacterized LOC285540	LOC285540	0.963564	0.166167	-0.24337	-0.236623	LOC285540	1.30031	1.35028	0.564865	0.744318	0.744321	-0.239997	LOC285540	1.71422	0.963564	0.986339	0.166167	0.74258	-0.24337	0.746061	-0.236623	LOC285540	16.0075	9.21054	6.93429	6.9668
CTGF	-1.74511	0.238913	1.74511	0.238913	CTGF	CTGF	1490	connective tissue growth factor	CTGF	-0.151342	0.74074	-0.320433	-0.696805	CTGF	194.693	204.072	0.294699	111.565	112.515	-0.508619	CTGF	142.915	-0.151342	265.229	0.74074	127.109	-0.320433	97.9213	-0.696805	CTGF	3124.47	5798.54	2778.92	2140.8
TIPARP	-1.74323	0.52424	1.74323	0.52424	TIPARP	TIPARP	25976	TCDD-inducible poly(ADP-ribose) polymerase	TIPARP	0.707643	0.00344991	0.541004	-1.43343	TIPARP	3.96268	4.08128	0.355546	2.27319	2.82649	-0.446213	TIPARP	5.05802	0.707643	3.10454	0.00344991	4.50627	0.541004	1.14671	-1.43343	TIPARP	182.528	111.55	160.356	40.8055
OCA2	-1.74158	0.743944	1.74158	0.743944	OCA2	OCA2	4948	oculocutaneous albinism II	OCA2	-2.52438	1.03187	-2.73131	-0.361986	OCA2	0.457464	0.851194	-0.746253	0.262672	0.356318	-1.54665	OCA2	0.133379	-2.52438	1.56901	1.03187	0.115557	-2.73131	0.59708	-0.361986	OCA2	4.00188	47.0761	3.46714	17.9146
RNF122	-1.73968	0.15563	1.73968	0.15563	RNF122	RNF122	79845	ring finger protein 122	RNF122	0.147107	0.26225	-0.240394	-0.947891	RNF122	1.04132	1.04215	0.204679	0.598568	0.616652	-0.594143	RNF122	1.00058	0.147107	1.08371	0.26225	0.764896	-0.240394	0.468408	-0.947891	RNF122	17.008	18.4211	13.0018	7.96205
OTUD7B	-1.73879	0.00480888	1.73879	0.00480888	OTUD7B	OTUD7B	56957	OTU domain containing 7B	OTUD7B	0.279011	0.187959	-0.532776	-0.596418	OTUD7B	1.11386	1.11441	0.233485	0.640596	0.640752	-0.564597	OTUD7B	1.14957	0.279011	1.07926	0.187959	0.654882	-0.532776	0.626621	-0.596418	OTUD7B	73.0343	68.5673	41.6057	39.8103
APOE	-1.73833	0.597873	1.73833	0.597873	APOE	APOE	348	apolipoprotein E	APOE	0.910673	0.61882	1.24301	-1.30892	APOE	12.6287	12.6934	0.764747	7.26485	10.2963	-0.0329548	APOE	13.9729	0.910673	11.4138	0.61882	17.5926	1.24301	3.00001	-1.30892	APOE	139.065	113.597	175.091	29.8577
SMCR8	-1.73479	0.0514198	1.73479	0.0514198	SMCR8	SMCR8	140775	Smith-Magenis syndrome chromosome region, candidate 8	SMCR8	0.534148	0.330896	-0.204633	-0.519846	SMCR8	2.77306	2.77994	0.432522	1.5985	1.60804	-0.362239	SMCR8	2.97544	0.534148	2.58444	0.330896	1.78302	-0.204633	1.43307	-0.519846	SMCR8	246.867	214.427	147.934	118.9
C14orf126	-1.73191	0.138329	1.73191	0.138329	C14orf126	DTD2	112487	D-tyrosyl-tRNA deacylase 2 (putative)	C14orf126	-0.0384367	0.621335	-0.508401	-0.493429	C14orf126	4.47094	4.58833	0.291449	2.58151	2.58154	-0.500915	C14orf126	3.55708	-0.0384367	5.61959	0.621335	2.56815	-0.508401	2.59494	-0.493429	C14orf126	90.0423	142.252	65.009	65.6869
ZNF585A	-1.73113	0.195856	1.73113	0.195856	ZNF585A	ZNF585A	199704	zinc finger protein 585A	ZNF585A	-0.191218	0.370392	-0.398146	-1.00611	ZNF585A	2.11681	2.15703	0.0895868	1.22279	1.25003	-0.702129	ZNF585A	1.74241	-0.191218	2.57165	0.370392	1.50959	-0.398146	0.990473	-1.00611	ZNF585A	70.0329	103.363	60.675	39.8103
TRIM16L	-1.73063	0.363999	1.73063	0.363999	TRIM16L	TRIM16L	147166	tripartite motif containing 16-like	TRIM16L	-0.408482	0.833653	-0.852914	-0.304512	TRIM16L	9.48711	10.3799	0.212585	5.48188	5.58119	-0.578713	TRIM16L	6.16842	-0.408482	14.5913	0.833653	4.53301	-0.852914	6.62937	-0.304512	TRIM16L	112.053	265.059	82.3447	120.426
ZNF527	-1.7301	0.326122	1.7301	0.326122	ZNF527	ZNF527	84503	zinc finger protein 527	ZNF527	-0.215945	0.47124	-0.155396	-1.17102	ZNF527	1.36121	1.4	0.127648	0.786783	0.836028	-0.663207	ZNF527	1.07274	-0.215945	1.72726	0.47124	1.11872	-0.155396	0.553336	-1.17102	ZNF527	54.0254	86.9884	56.3411	27.8672
LOC283050	-1.72944	0.269243	1.72944	0.269243	LOC283050	LOC283050	283050	uncharacterized LOC283050	LOC283050	0.106686	0.776809	0.0517565	-0.748877	LOC283050	0.573815	0.58936	0.441747	0.331792	0.344647	-0.34856	LOC283050	0.454892	0.106686	0.723828	0.776809	0.437898	0.0517565	0.251396	-0.748877	LOC283050	9.00423	14.3275	8.66786	4.97628
IL18R1	-1.72254	0.242087	1.72254	0.242087	IL18R1	IL18R1	8809	interleukin 18 receptor 1	IL18R1	-0.808217	0.0724609	-1.33708	-0.967758	IL18R1	0.400155	0.41894	-0.367878	0.232305	0.23421	-1.15242	IL18R1	0.294899	-0.808217	0.54298	0.0724609	0.204395	-1.33708	0.264026	-0.967758	IL18R1	10.0047	18.4211	6.93429	8.95731
LOC440028	-1.72254	0.27972	1.72254	0.27972	LOC440028	LOC440028	440028	uncharacterized LOC440028	LOC440028	0.721604	-0.152606	-0.807253	-0.192824	LOC440028	0.514724	0.53853	0.284499	0.298817	0.305617	-0.500039	LOC440028	0.696877	0.721604	0.380183	-0.152606	0.241504	-0.807253	0.369731	-0.192824	LOC440028	15.0071	8.18714	5.20072	7.96205
NEAT1	-1.72161	0.545889	1.72161	0.545889	NEAT1	NEAT1	283131	nuclear paraspeckle assembly transcript 1 (non-protein coding)	NEAT1	0.380927	0.640785	0.806625	-1.35244	NEAT1	7.82024	7.85198	0.510856	4.54239	5.87451	-0.272906	NEAT1	7.14673	0.380927	8.55722	0.640785	9.59965	0.806625	2.14938	-1.35244	NEAT1	258.121	309.065	346.714	77.63
POTEE	-1.72069	0.226672	1.72069	0.226672	POTEE	POTEE	445582	POTE ankyrin domain family, member E	POTEE	0.688583	-0.00571556	-0.149113	-0.733992	POTEE	1.14068	1.17386	0.341434	0.662918	0.676584	-0.441552	POTEE	1.45099	0.688583	0.896726	-0.00571556	0.811882	-0.149113	0.541286	-0.733992	POTEE	48.0226	29.6784	26.8704	17.9146
BCAN	-1.71856	0.00897093	1.71856	0.00897093	BCAN	BCAN	63827	brevican	BCAN	0.496381	0.409786	-0.267497	-0.388733	BCAN	0.789527	0.789883	0.453084	0.459412	0.459818	-0.328115	BCAN	0.813581	0.496381	0.766184	0.409786	0.479127	-0.267497	0.440509	-0.388733	BCAN	27.0127	25.5848	13.0018	13.9336
GPR107	-1.71811	0.147444	1.71811	0.147444	GPR107	GPR107	57720	G protein-coupled receptor 107	GPR107	-0.00962333	0.529004	-0.316123	-0.72614	GPR107	5.69556	5.79509	0.25969	3.31502	3.34855	-0.521131	GPR107	4.72569	-0.00962333	6.86449	0.529004	3.8212	-0.316123	2.87589	-0.72614	GPR107	329.155	472.808	263.503	199.051
MBLAC1	-1.71432	0.396853	1.71432	0.396853	MBLAC1	MBLAC1	255374	metallo-beta-lactamase domain containing 1	MBLAC1	0.181194	0.835364	-0.918821	0.380105	MBLAC1	1.23424	1.2661	0.508279	0.719961	0.794154	-0.269358	MBLAC1	0.983872	0.181194	1.54833	0.835364	0.458988	-0.918821	1.12932	0.380105	MBLAC1	13.0061	20.4679	6.0675	14.9288
FPGT-TNNI3K	-1.71381	0.265761	1.71381	0.265761	FPGT-TNNI3K	FPGT-TNNI3K	100526835	FPGT-TNNI3K readthrough	FPGT-TNNI3K	0.046393	1.04241	-0.333762	-0.131841	FPGT-TNNI3K	0.587298	0.622637	0.544401	0.342687	0.343526	-0.232802	FPGT-TNNI3K	0.415856	0.046393	0.829419	1.04241	0.319525	-0.333762	0.367527	-0.131841	FPGT-TNNI3K	11.9638	22.8881	8.42206	9.6873
PGAP1	-1.71363	0.306392	1.71363	0.306392	PGAP1	PGAP1	80055	post-GPI attachment to proteins 1	PGAP1	-0.0137926	0.54052	-0.0148698	-1.01251	PGAP1	1.76961	1.80236	0.263364	1.03267	1.09501	-0.51369	PGAP1	1.46031	-0.0137926	2.14442	0.54052	1.45922	-0.0148698	0.730804	-1.01251	PGAP1	163.077	239.474	162.956	81.611
DAB2IP	-1.71301	0.0672381	1.71301	0.0672381	DAB2IP	DAB2IP	153090	DAB2 interacting protein	DAB2IP	0.0808643	-0.0837226	-0.582356	-0.97357	DAB2IP	2.05756	2.06091	-0.00142917	1.20114	1.21219	-0.777963	DAB2IP	2.17834	0.0808643	1.94348	-0.0837226	1.37555	-0.582356	1.04884	-0.97357	DAB2IP	115.054	104.386	70.2097	50.7581
LOC401052	-1.71238	0.24926	1.71238	0.24926	LOC401052	LOC401052	401052	uncharacterized LOC401052	LOC401052	0.484994	0.447286	-0.792326	0.172601	LOC401052	1.19902	1.19912	0.46614	0.700205	0.739726	-0.309863	LOC401052	1.21479	0.484994	1.18345	0.447286	0.501175	-0.792326	0.978276	0.172601	LOC401052	21.0099	20.4679	8.66786	16.9194
GCA	-1.7095	0.316295	1.7095	0.316295	GCA	GCA	25801	grancalcin, EF-hand calcium binding protein	GCA	-0.464465	0.672268	-0.536134	-0.803208	GCA	11.2365	12.1198	0.103902	6.57299	6.60117	-0.669671	GCA	7.57768	-0.464465	16.662	0.672268	7.21044	-0.536134	5.9919	-0.803208	GCA	234.11	514.767	222.764	185.118
C17orf57	-1.70703	0.57069	1.70703	0.57069	C17orf57	EFCAB13	124989	EF-hand calcium binding domain 13	C17orf57	0.664926	-0.409199	0.370598	-1.65785	C17orf57	1.41223	1.51122	0.127864	0.827303	1.0403	-0.643626	C17orf57	2.04917	0.664926	0.973272	-0.409199	1.671	0.370598	0.409593	-1.65785	C17orf57	73.0343	35.8188	57.2079	13.9336
FMO4	-1.70667	0.362653	1.70667	0.362653	FMO4	FMO4	2329	flavin containing monooxygenase 4	FMO4	0.598123	0.337074	-0.949841	0.342665	FMO4	1.75637	1.76356	0.467599	1.02912	1.13411	-0.303588	FMO4	1.92268	0.598123	1.60444	0.337074	0.657542	-0.949841	1.61067	0.342665	FMO4	38.0179	31.7252	13.0018	31.8482
ZFP112	-1.70579	0.193873	1.70579	0.193873	ZFP112	ZFP112	7771	zinc finger protein 112 homolog (mouse)	ZFP112	-0.0778107	0.356475	-0.295297	-0.966926	ZFP112	4.57215	4.62404	0.139332	2.68036	2.75331	-0.631111	ZFP112	3.93327	-0.0778107	5.3148	0.356475	3.38286	-0.295297	2.12375	-0.966926	ZFP112	141.066	190.351	120.483	75.6395
ATXN1	-1.7033	0.181066	1.7033	0.181066	ATXN1	ATXN1	6310	ataxin 1	ATXN1	0.481777	0.0549334	-0.184695	-0.815261	ATXN1	0.357217	0.361133	0.268355	0.209721	0.214749	-0.499978	ATXN1	0.41417	0.481777	0.308096	0.0549334	0.260946	-0.184695	0.168551	-0.815261	ATXN1	44.0207	32.7486	27.7372	17.9146
DUSP19	-1.70234	0.378027	1.70234	0.378027	DUSP19	DUSP19	142679	dual specificity phosphatase 19	DUSP19	-0.167141	0.964753	-0.751524	0.0141026	DUSP19	1.82086	1.96277	0.398806	1.06962	1.1075	-0.368711	DUSP19	1.23001	-0.167141	2.69552	0.964753	0.820336	-0.751524	1.39466	0.0141026	DUSP19	63.0296	140.205	42.4725	73.649
ZNF624	-1.70232	0.0488372	1.70232	0.0488372	ZNF624	ZNF624	57547	zinc finger protein 624	ZNF624	0.312091	0.197934	-0.679111	-0.345864	ZNF624	2.88522	2.88748	0.255013	1.69488	1.70619	-0.512488	ZNF624	3.00166	0.312091	2.7733	0.197934	1.51001	-0.679111	1.90238	-0.345864	ZNF624	124.058	114.62	62.4086	78.6253
PLK3	-1.70164	0.262264	1.70164	0.262264	PLK3	PLK3	1263	polo-like kinase 3	PLK3	-0.357455	0.0856927	-0.458773	-1.34684	PLK3	4.18593	4.2354	-0.135881	2.45994	2.57737	-0.902809	PLK3	3.58998	-0.357455	4.88082	0.0856927	3.34651	-0.458773	1.80824	-1.34684	PLK3	79.0372	107.456	73.6768	39.8103
TRIM66	-1.70142	0.356499	1.70142	0.356499	TRIM66	TRIM66	9866	tripartite motif containing 66	TRIM66	0.205785	0.909844	0.331429	-0.74928	TRIM66	0.35273	0.363283	0.557814	0.207315	0.222027	-0.208926	TRIM66	0.276357	0.205785	0.450208	0.909844	0.301504	0.331429	0.14255	-0.74928	TRIM66	27.0127	44.0059	29.4707	13.9336
SPG20	-1.69992	0.447747	1.69992	0.447747	SPG20	SPG20	23111	spastic paraplegia 20 (Troyer syndrome)	SPG20	-0.109251	-0.0666184	-0.0365869	-1.67022	SPG20	4.76451	4.76503	-0.0879348	2.80278	3.26413	-0.853403	SPG20	4.69463	-0.109251	4.83543	-0.0666184	4.93714	-0.0365869	1.59112	-1.67022	SPG20	229.108	236.404	240.1	77.63
RTTN	-1.69832	0.0565371	1.69832	0.0565371	RTTN	RTTN	25914	rotatin	RTTN	0.333276	0.450621	-0.19162	-0.552694	RTTN	2.68977	2.69199	0.391948	1.58378	1.5962	-0.372157	RTTN	2.58257	0.333276	2.80141	0.450621	1.79491	-0.19162	1.39749	-0.552694	RTTN	182.086	197.515	126.551	98.5304
JRK	-1.69729	0.214729	1.69729	0.214729	JRK	JRK	8629	jerky homolog (mouse)	JRK	0.0603287	0.244583	-0.195351	-1.02621	JRK	1.85192	1.8557	0.152456	1.0911	1.13665	-0.61078	JRK	1.73736	0.0603287	1.97404	0.244583	1.4552	-0.195351	0.818106	-1.02621	JRK	137.064	180.117	97.9468	74.6442
HNMT	-1.69551	0.413961	1.69551	0.413961	HNMT	HNMT	3176	histamine N-methyltransferase	HNMT	0.144696	1.61481	-0.00153193	0.237592	HNMT	7.04708	7.98172	0.879751	4.15631	4.17059	0.11803	HNMT	4.23385	0.144696	11.7296	1.61481	3.82575	-0.00153193	4.51544	0.237592	HNMT	107.05	309.065	87.5454	121.421
GPR89B	-1.69513	0.394954	1.69513	0.394954	GPR89B	GPR89B	51463	G protein-coupled receptor 89B	GPR89B	0.680143	-0.00338209	0.197577	-1.0436	GPR89B	0.929343	0.955542	0.33838	0.548244	0.599754	-0.423012	GPR89B	1.17776	0.680143	0.733323	-0.00338209	0.842927	0.197577	0.356581	-1.0436	GPR89B	23.0108	14.3275	16.4689	6.9668
ANTXR2	-1.69233	0.0802597	1.69233	0.0802597	ANTXR2	ANTXR2	118429	anthrax toxin receptor 2	ANTXR2	0.872114	0.526803	0.090966	-0.21007	ANTXR2	4.60976	4.64281	0.699458	2.72392	2.73875	-0.0595519	ANTXR2	5.19581	0.872114	4.08982	0.526803	3.02346	0.090966	2.45405	-0.21007	ANTXR2	223.105	200.585	191.56	126.398
LOC100287015	-1.69204	0.290105	1.69204	0.290105	LOC100287015	LOC100287015	100287015	uncharacterized LOC100287015	LOC100287015	-0.283253	0.648903	-0.833072	-0.318803	LOC100287015	3.18998	3.3579	0.182825	1.88529	1.91531	-0.575937	LOC100287015	2.30932	-0.283253	4.40647	0.648903	1.57751	-0.833072	2.25311	-0.318803	LOC100287015	52.0245	99.2691	35.5382	50.7581
SERPINA5	-1.69164	0.456917	1.69164	0.456917	SERPINA5	SERPINA5	5104	serpin peptidase inhibitor, clade A (alpha-1 antiproteinase, antitrypsin), member 5	SERPINA5	0.0816924	0.261214	0.237327	-1.41127	SERPINA5	1.38369	1.38636	0.171453	0.817953	0.955137	-0.586973	SERPINA5	1.30022	0.0816924	1.47251	0.261214	1.44833	0.237327	0.461944	-1.41127	SERPINA5	28.0132	31.7252	31.2043	9.95257
SWT1	-1.69028	0.104853	1.69028	0.104853	SWT1	SWT1	54823	SWT1 RNA endoribonuclease homolog (S. cerevisiae)	SWT1	0.315503	0.689528	-0.0646621	-0.444823	SWT1	4.65003	4.68915	0.502516	2.75105	2.77496	-0.254742	SWT1	4.08469	0.315503	5.29361	0.689528	3.13847	-0.0646621	2.41145	-0.444823	SWT1	151.071	194.445	115.283	88.5778
NOSTRIN	-1.68843	0.359769	1.68843	0.359769	NOSTRIN	NOSTRIN	115677	nitric oxide synthase trafficker	NOSTRIN	0.0983641	0.716276	0.213425	-0.910154	NOSTRIN	0.293986	0.300753	0.40732	0.174118	0.187487	-0.348364	NOSTRIN	0.237313	0.0983641	0.364193	0.716276	0.257015	0.213425	0.117958	-0.910154	NOSTRIN	4.00188	6.14036	4.33393	1.99051
KHDRBS3	-1.68774	0.241123	1.68774	0.241123	KHDRBS3	KHDRBS3	10656	KH domain containing, RNA binding, signal transduction associated 3	KHDRBS3	0.486049	0.688655	0.279117	-0.614597	KHDRBS3	1.91873	1.92346	0.587352	1.13686	1.19183	-0.16774	KHDRBS3	1.78862	0.486049	2.0583	0.688655	1.54962	0.279117	0.834047	-0.614597	KHDRBS3	32.0151	36.8421	27.7372	14.9288
GPC2	-1.68774	0.107129	1.68774	0.107129	GPC2	GPC2	221914	glypican 2	GPC2	0.170279	0.202962	-0.299685	-0.837259	GPC2	0.51023	0.510262	0.18662	0.302315	0.307578	-0.568472	GPC2	0.504483	0.170279	0.516042	0.202962	0.364228	-0.299685	0.250927	-0.837259	GPC2	12.0056	12.2807	8.66786	5.97154
LOC389247	-1.68774	0.350773	1.68774	0.350773	LOC389247	LOC389247	389247	uncharacterized LOC389247	LOC389247	1.01641	0.464136	0.546451	-0.576085	LOC389247	0.844982	0.860507	0.740274	0.500659	0.539028	-0.0148167	LOC389247	1.02323	1.01641	0.697785	0.464136	0.738756	0.546451	0.3393	-0.576085	LOC389247	6.00282	4.09357	4.33393	1.99051
PVRIG	-1.68774	0.359759	1.68774	0.359759	PVRIG	PVRIG	79037	poliovirus receptor related immunoglobulin domain containing	PVRIG	-0.0685478	0.549096	0.0464523	-1.07608	PVRIG	0.355701	0.363882	0.240274	0.210756	0.226908	-0.514816	PVRIG	0.287158	-0.0685478	0.440606	0.549096	0.310985	0.0464523	0.142831	-1.07608	PVRIG	4.00188	6.14036	4.33393	1.99051
LOC654433	-1.68766	0.218825	1.68766	0.218825	LOC654433	LOC654433	654433	uncharacterized LOC654433	LOC654433	0.0313703	0.327089	-0.175555	-0.976032	LOC654433	1.31365	1.32056	0.17923	0.778389	0.808535	-0.575794	LOC654433	1.18569	0.0313703	1.45543	0.327089	1.02726	-0.175555	0.589811	-0.976032	LOC654433	30.0141	36.8421	26.0036	14.9302
ICAM1	-1.68695	0.396643	1.68695	0.396643	ICAM1	ICAM1	3383	intercellular adhesion molecule 1	ICAM1	-0.268264	0.138816	-0.144081	-1.49421	ICAM1	57.9924	58.5705	-0.0647241	34.377	38.2096	-0.819143	ICAM1	50.3616	-0.268264	66.7794	0.138816	54.8886	-0.144081	21.5305	-1.49421	ICAM1	1566.74	2077.49	1707.57	669.808
TRIM13	-1.68666	0.0698632	1.68666	0.0698632	TRIM13	TRIM13	10206	tripartite motif containing 13	TRIM13	0.147611	0.487022	-0.561458	-0.312255	TRIM13	2.4377	2.45458	0.317316	1.44528	1.45067	-0.436856	TRIM13	2.16717	0.147611	2.74199	0.487022	1.32569	-0.561458	1.57565	-0.312255	TRIM13	149.728	186.318	92.2691	105.643
LOC285074	-1.68628	0.252986	1.68628	0.252986	LOC285074	LOC285074	285074	anaphase promoting complex subunit 1 pseudogene	LOC285074	0.162956	0.315925	-0.98258	-0.046221	LOC285074	1.18892	1.19059	0.23944	0.705056	0.742508	-0.514401	LOC285074	1.12753	0.162956	1.25365	0.315925	0.509668	-0.98258	0.975348	-0.046221	LOC285074	23.0108	25.5848	10.4014	19.9051
DOK3	-1.68483	0.597778	1.68483	0.597778	DOK3	DOK3	79930	docking protein 3	DOK3	-0.155118	0.614707	-1.67135	0.625742	DOK3	1.16298	1.20461	0.229795	0.690264	0.920807	-0.522805	DOK3	0.890636	-0.155118	1.51859	0.614707	0.311364	-1.67135	1.53025	0.625742	DOK3	15.0071	27.6316	6.0675	29.8577
PRDM10	-1.68406	0.331283	1.68406	0.331283	PRDM10	PRDM10	56980	PR domain containing 10	PRDM10	0.0390777	0.176249	-1.23147	-0.0570935	PRDM10	1.96508	1.96731	0.107663	1.16687	1.26486	-0.644283	PRDM10	1.87385	0.0390777	2.06076	0.176249	0.776714	-1.23147	1.75301	-0.0570935	PRDM10	117.055	128.776	48.54	106.182
PLA2G4B	-1.68351	0.219574	1.68351	0.219574	PLA2G4B	PLA2G4B	100137049	phospholipase A2, group IVB (cytosolic)	PLA2G4B	0.298396	0.373987	0.00875226	-0.839319	PLA2G4B	2.77376	2.77472	0.336191	1.6476	1.71928	-0.415283	PLA2G4B	2.70204	0.298396	2.84739	0.373987	2.21055	0.00875226	1.22802	-0.839319	PLA2G4B	69.92	73.6812	57.2018	31.7772
CHIC1	-1.68351	0.237622	1.68351	0.237622	CHIC1	CHIC1	53344	cysteine-rich hydrophobic domain 1	CHIC1	0.369266	0.268677	-0.880736	0.0157317	CHIC1	1.9149	1.91606	0.318972	1.13744	1.19278	-0.432502	CHIC1	1.98283	0.369266	1.84929	0.268677	0.833676	-0.880736	1.55189	0.0157317	CHIC1	136.064	126.901	57.2079	106.492
PKP2	-1.68203	0.0954172	1.68203	0.0954172	PKP2	PKP2	5318	plakophilin 2	PKP2	0.523006	0.748334	0.108635	-0.337698	PKP2	2.88632	2.89513	0.63567	1.71598	1.73655	-0.114532	PKP2	2.6695	0.523006	3.12076	0.748334	2.00305	0.108635	1.47005	-0.337698	PKP2	112.053	130.994	84.0783	61.7059
SLC16A2	-1.68103	0.0119436	1.68103	0.0119436	SLC16A2	SLC16A2	6567	solute carrier family 16, member 2 (thyroid hormone transporter)	SLC16A2	0.100317	0.0741051	-0.580545	-0.743724	SLC16A2	0.581266	0.58129	0.0872111	0.345779	0.346332	-0.662134	SLC16A2	0.58657	0.100317	0.576009	0.0741051	0.365898	-0.580545	0.326767	-0.743724	SLC16A2	25.0118	24.5614	15.6021	13.9336
LOC100506083	-1.68059	0.593555	1.68059	0.593555	LOC100506083	LOC100506083	100506083	uncharacterized LOC100506083	LOC100506083	0.316491	1.15157	-1.12985	1.09997	LOC100506083	2.09837	2.18687	0.734033	1.24859	1.64036	-0.0149381	LOC100506083	1.57105	0.316491	2.80269	1.15157	0.5765	-1.12985	2.70421	1.09997	LOC100506083	20.3177	36.246	7.45563	34.9724
DICER1-AS1	-1.6802	0.508576	1.6802	0.508576	DICER1-AS1	DICER1-AS1	400242	DICER1 antisense RNA 1	DICER1-AS1	0.996719	0.0528671	0.586978	-1.03466	DICER1-AS1	7.22306	7.61297	0.524793	4.29893	4.99592	-0.223841	DICER1-AS1	10.0181	0.996719	5.20784	0.0528671	7.54121	0.586978	2.45064	-1.03466	DICER1-AS1	61.0287	31.7252	45.9397	14.9288
LSM14B	-1.6795	0.126665	1.6795	0.126665	LSM14B	LSM14B	149986	LSM14B, SCD6 homolog B (S. cerevisiae)	LSM14B	0.151289	0.529751	-0.181167	-0.633858	LSM14B	2.24097	2.26027	0.34052	1.3343	1.35076	-0.407512	LSM14B	1.96549	0.151289	2.55505	0.529751	1.56096	-0.181167	1.14056	-0.633858	LSM14B	48.0226	62.427	38.1386	27.8672
ALMS1	-1.67912	0.396838	1.67912	0.396838	ALMS1	ALMS1	7840	Alstrom syndrome 1	ALMS1	0.124931	0.408263	-1.16577	0.203549	ALMS1	1.65302	1.661	0.266597	0.984458	1.09741	-0.481109	ALMS1	1.49842	0.124931	1.82358	0.408263	0.612484	-1.16577	1.58234	0.203549	ALMS1	195.092	237.427	79.7443	206.018
GALNTL4	-1.67892	0.608519	1.67892	0.608519	GALNTL4	GALNTL4	374378	UDP-N-acetyl-alpha-D-galactosamine:polypeptide N-acetylgalactosaminyltransferase-like 4	GALNTL4	-0.830389	-0.134741	-0.037319	-2.42288	GALNTL4	0.646757	0.665644	-0.482565	0.385221	0.524554	-1.2301	GALNTL4	0.508201	-0.830389	0.823088	-0.134741	0.880589	-0.037319	0.168518	-2.42288	GALNTL4	12.0056	19.4445	20.8029	3.98103
PLEKHH1	-1.67876	0.483851	1.67876	0.483851	PLEKHH1	PLEKHH1	57475	pleckstrin homology domain containing, family H (with MyTH4 domain) member 1	PLEKHH1	0.609283	0.143347	0.474383	-1.21654	PLEKHH1	2.0019	2.02806	0.376315	1.19249	1.40318	-0.371079	PLEKHH1	2.35273	0.609283	1.70338	0.143347	2.14271	0.474383	0.663658	-1.21654	PLEKHH1	152.557	110.451	138.939	43.0332
LOC642852	-1.67842	0.124361	1.67842	0.124361	LOC642852	LOC642852	642852	uncharacterized LOC642852	LOC642852	-0.0985183	0.199059	-0.446308	-0.947364	LOC642852	2.00836	2.01906	0.0502705	1.19658	1.21466	-0.696836	LOC642852	1.81156	-0.0985183	2.22655	0.199059	1.4235	-0.446308	1.00583	-0.947364	LOC642852	129.061	158.626	101.414	71.6585
LOC339535	-1.6779	0.35945	1.6779	0.35945	LOC339535	LOC339535	339535	uncharacterized LOC339535	LOC339535	0.133836	0.364457	0.124845	-1.11986	LOC339535	8.15968	8.18576	0.249147	4.86304	5.32258	-0.497508	LOC339535	7.53288	0.133836	8.83863	0.364457	7.48608	0.124845	3.15908	-1.11986	LOC339535	102.048	119.737	101.414	42.796
C14orf43	-1.67783	0.151573	1.67783	0.151573	C14orf43	ELMSAN1	91748	ELM2 and Myb/SANT-like domain containing 1	C14orf43	0.119312	0.634962	-0.164512	-0.574399	C14orf43	17.1087	17.3826	0.377137	10.1969	10.3	-0.369456	C14orf43	14.3088	0.119312	20.4564	0.634962	11.7534	-0.164512	8.84658	-0.574399	C14orf43	1116.52	1583.19	908.392	680.756
BIRC3	-1.67567	0.0113933	1.67567	0.0113933	BIRC3	BIRC3	330	baculoviral IAP repeat containing 3	BIRC3	-0.319355	-0.255869	-0.958725	-1.10598	BIRC3	2.07072	2.07123	-0.287612	1.23576	1.23737	-1.03235	BIRC3	2.02566	-0.319355	2.11679	-0.255869	1.30046	-0.958725	1.17427	-1.10598	BIRC3	139.065	145.322	89.279	80.6158
DTX2P1-UPK3BP1-PMS2P11	-1.67491	0.589796	1.67491	0.589796	DTX2P1-UPK3BP1-PMS2P11	DTX2P1-UPK3BP1-PMS2P11	441263	DTX2P1-UPK3BP1-PMS2P11 readthrough (non-protein coding)	DTX2P1-UPK3BP1-PMS2P11	0.740936	-0.341858	-1.58147	0.49239	DTX2P1-UPK3BP1-PMS2P11	0.561965	0.602001	0.199539	0.33552	0.42598	-0.544542	DTX2P1-UPK3BP1-PMS2P11	0.817873	0.740936	0.386129	-0.341858	0.16352	-1.58147	0.68844	0.49239	DTX2P1-UPK3BP1-PMS2P11	13.0061	6.14036	2.60036	10.9478
SAMD15	-1.67401	0.130516	1.67401	0.130516	SAMD15	SAMD15	161394	sterile alpha motif domain containing 15	SAMD15	0.769345	0.206417	-0.355125	-0.155735	SAMD15	3.00839	3.06582	0.487881	1.79711	1.8014	-0.25543	SAMD15	3.65648	0.769345	2.47517	0.206417	1.67712	-0.355125	1.92569	-0.155735	SAMD15	68.032	46.0527	31.2043	35.8292
SRC	-1.67368	0.137112	1.67368	0.137112	SRC	SRC	6714	v-src sarcoma (Schmidt-Ruppin A-2) viral oncogene homolog (avian)	SRC	0.239634	0.530468	-0.0867733	-0.629174	SRC	25.464	25.5935	0.385051	15.2144	15.484	-0.357974	SRC	23.0225	0.239634	28.1645	0.530468	18.3609	-0.0867733	12.6071	-0.629174	SRC	896.421	1112.43	726.367	497.628
CARD14	-1.67271	0.0923846	1.67271	0.0923846	CARD14	CARD14	79092	caspase recruitment domain family, member 14	CARD14	0.291265	0.531343	-0.119903	-0.541869	CARD14	0.608974	0.611083	0.411304	0.364063	0.367963	-0.330886	CARD14	0.560355	0.291265	0.661811	0.531343	0.421395	-0.119903	0.314532	-0.541869	CARD14	15.0071	19.4445	9.53465	11.9431
HIST2H2BE	-1.67069	0.533343	1.67069	0.533343	HIST2H2BE	HIST2H2BE	8349	histone cluster 2, H2be	HIST2H2BE	1.31408	-0.188448	0.470658	-0.825909	HIST2H2BE	4.92576	5.60884	0.562816	2.94835	3.25106	-0.177625	HIST2H2BE	8.29138	1.31408	2.92631	-0.188448	4.62095	0.470658	1.88116	-0.825909	HIST2H2BE	171.08	60.3802	95.3465	38.815
ATP7B	-1.66947	0.0715572	1.66947	0.0715572	ATP7B	ATP7B	540	ATPase, Cu++ transporting, beta polypeptide	ATP7B	0.349469	-0.0667958	-0.619026	-0.57708	ATP7B	1.65289	1.67013	0.141336	0.990072	0.990177	-0.598053	ATP7B	1.90941	0.349469	1.43084	-0.0667958	0.975783	-0.619026	1.00457	-0.57708	ATP7B	119.056	94.1522	58.9415	65.6869
ZYG11A	-1.66835	0.0180609	1.66835	0.0180609	ZYG11A	ZYG11A	440590	zyg-11 homolog A (C. elegans)	ZYG11A	0.826188	0.904671	0.219647	0.0343748	ZYG11A	1.53197	1.53254	0.86543	0.918255	0.920149	0.127011	ZYG11A	1.49086	0.826188	1.57421	0.904671	0.979151	0.219647	0.861147	0.0343748	ZYG11A	62.0292	65.4972	40.7389	35.8292
TMED8	-1.66568	0.284648	1.66568	0.284648	TMED8	TMED8	283578	transmembrane emp24 protein transport domain containing 8	TMED8	0.549026	-0.155261	-0.172479	-0.905977	TMED8	2.98248	3.07177	0.196882	1.79055	1.84872	-0.539228	TMED8	3.807	0.549026	2.33653	-0.155261	2.30881	-0.172479	1.38862	-0.905977	TMED8	30.0141	18.4211	18.2025	10.9478
MPP5	-1.66373	0.420443	1.66373	0.420443	MPP5	MPP5	64398	membrane protein, palmitoylated 5 (MAGUK p55 subfamily member 5)	MPP5	-0.694358	0.76403	-0.738305	-0.660863	MPP5	13.5865	15.3592	0.0348361	8.16629	8.16924	-0.699584	MPP5	8.19593	-0.694358	22.5225	0.76403	7.95003	-0.738305	8.38844	-0.660863	MPP5	453.213	1239.33	432.526	463.79
DNHD1	-1.66022	0.227717	1.66022	0.227717	DNHD1	DNHD1	144132	dynein heavy chain domain 1	DNHD1	0.113205	0.514807	-0.792414	-0.0423276	DNHD1	1.31343	1.32617	0.314006	0.791115	0.817997	-0.417371	DNHD1	1.14277	0.113205	1.50957	0.514807	0.610015	-0.792414	1.02598	-0.0423276	DNHD1	62.0292	114.62	35.5382	56.7296
IGFBP3	-1.65978	0.524992	1.65978	0.524992	IGFBP3	IGFBP3	3486	insulin-like growth factor binding protein 3	IGFBP3	-2.35137	-0.47623	-2.33948	-1.95011	IGFBP3	9.02568	10.9997	-1.4138	5.43788	5.48747	-2.14479	IGFBP3	4.71241	-2.35137	17.2869	-0.47623	4.75141	-2.33948	6.22352	-1.95011	IGFBP3	116.055	425.731	117.016	153.27
PDXDC2P	-1.65891	0.325665	1.65891	0.325665	PDXDC2P	PDXDC2P	283970	pyridoxal-dependent decarboxylase domain containing 2, pseudogene	PDXDC2P	0.696975	0.0815038	0.133357	-0.815353	PDXDC2P	2.08552	2.13314	0.389239	1.25716	1.32573	-0.340998	PDXDC2P	2.58138	0.696975	1.68491	0.0815038	1.74657	0.133357	0.90489	-0.815353	PDXDC2P	105.049	68.5673	71.0765	36.8245
SEMA4C	-1.658	0.275107	1.658	0.275107	SEMA4C	SEMA4C	54910	sema domain, immunoglobulin domain (Ig), transmembrane domain (TM) and short cytoplasmic domain, (semaphorin) 4C	SEMA4C	-0.224851	0.35786	-0.268776	-1.0571	SEMA4C	7.47275	7.62566	0.0665045	4.50709	4.67636	-0.66294	SEMA4C	6.10624	-0.224851	9.14508	0.35786	5.92313	-0.268776	3.42958	-1.0571	SEMA4C	209.098	313.158	202.828	117.44
APLF	-1.65754	0.10849	1.65754	0.10849	APLF	APLF	200558	aprataxin and PNKP like factor	APLF	-0.0980829	0.358624	-0.470438	-0.727109	APLF	3.7722	3.81955	0.130271	2.27578	2.28479	-0.598774	APLF	3.21998	-0.0980829	4.41912	0.358624	2.4875	-0.470438	2.08208	-0.727109	APLF	120.056	164.766	92.7461	77.63
KIF3C	-1.65707	0.256453	1.65707	0.256453	KIF3C	KIF3C	3797	kinesin family member 3C	KIF3C	-0.227403	0.683293	-0.414965	-0.586413	KIF3C	1.8979	1.99322	0.227945	1.14533	1.14736	-0.500689	KIF3C	1.3842	-0.227403	2.60223	0.683293	1.21545	-0.414965	1.07926	-0.586413	KIF3C	74.0348	139.181	65.009	57.7249
KLF12	-1.65659	0.140845	1.65659	0.140845	KLF12	KLF12	11278	Kruppel-like factor 12	KLF12	0.447533	0.26767	-0.663821	-0.0774033	KLF12	0.626193	0.627411	0.357601	0.378002	0.385836	-0.370612	KLF12	0.66647	0.447533	0.588351	0.26767	0.308482	-0.663821	0.46319	-0.0774033	KLF12	73.0343	64.4738	33.8047	50.7581
CFLAR	-1.65588	0.123451	1.65588	0.123451	CFLAR	CFLAR	8837	CASP8 and FADD-like apoptosis regulator	CFLAR	-0.0291948	0.506425	-0.399051	-0.578913	CFLAR	18.5244	18.8445	0.238615	11.1871	11.2088	-0.488982	CFLAR	15.386	-0.0291948	22.303	0.506425	11.9066	-0.399051	10.511	-0.578913	CFLAR	351.157	408.334	279.092	195.07
ERN1	-1.65524	0.346851	1.65524	0.346851	ERN1	ERN1	2081	endoplasmic reticulum to nucleus signaling 1	ERN1	0.571418	-0.0696748	0.0263109	-0.97865	ERN1	1.38049	1.41471	0.250871	0.834011	0.885111	-0.47617	ERN1	1.72396	0.571418	1.10545	-0.0696748	1.1815	0.0263109	0.588722	-0.97865	ERN1	67.0315	42.9825	45.9397	22.8909
SCAI	-1.65481	0.052833	1.65481	0.052833	SCAI	SCAI	286205	suppressor of cancer cell invasion	SCAI	0.157671	0.487452	-0.348545	-0.459656	SCAI	0.924438	0.930482	0.322562	0.558638	0.559052	-0.4041	SCAI	0.824595	0.157671	1.03637	0.487452	0.58057	-0.348545	0.537535	-0.459656	SCAI	101.048	126.901	71.0765	65.6869
GPCPD1	-1.65367	0.0324747	1.65367	0.0324747	GPCPD1	GPCPD1	56261	glycerophosphocholine phosphodiesterase GDE1 homolog (S. cerevisiae)	GPCPD1	0.312128	0.574545	-0.30984	-0.254837	GPCPD1	6.84672	6.87506	0.443337	4.14031	4.14106	-0.282339	GPCPD1	6.25151	0.312128	7.4986	0.574545	4.06213	-0.30984	4.21999	-0.254837	GPCPD1	336.158	403.217	218.43	226.919
RND3	-1.6532	0.400742	1.6532	0.400742	RND3	RND3	390	Rho family GTPase 3	RND3	-0.35531	0.968093	-0.596422	-0.241323	RND3	54.7385	60.5977	0.306392	33.1106	33.3616	-0.418873	RND3	34.602	-0.35531	86.5935	0.968093	29.2765	-0.596422	37.4468	-0.241323	RND3	908.427	2235.09	764.505	972.366
LOC100507421	-1.65009	0.556363	1.65009	0.556363	LOC100507421				LOC100507421	-1.42006	0.602568	-1.33749	-0.925101	LOC100507421	0.68505	0.86037	-0.408748	0.415159	0.419407	-1.13129	LOC100507421	0.339849	-1.42006	1.38089	0.602568	0.359869	-1.33749	0.478944	-0.925101	LOC100507421	36.0169	146.345	38.1386	50.7581
C1orf213	-1.64938	0.405519	1.64938	0.405519	C1orf213	C1orf213	148898	chromosome 1 open reading frame 213	C1orf213	-0.0973686	0.571535	0.119236	-1.08892	C1orf213	2.27123	2.33254	0.237083	1.37702	1.49951	-0.484842	C1orf213	1.80128	-0.0973686	2.86379	0.571535	2.09308	0.119236	0.90593	-1.08892	C1orf213	28.3487	54.2397	48.3242	24.6671
JUP	-1.64897	0.4761	1.64897	0.4761	JUP	JUP	3728	junction plakoglobin	JUP	0.281215	0.132675	0.311593	-1.34083	JUP	186.709	186.956	0.206945	113.227	132.308	-0.514619	JUP	196.572	0.281215	177.34	0.132675	200.755	0.311593	63.8612	-1.34083	JUP	6136.89	5534.51	6273.8	1980.56
STS	-1.6489	0.000325287	1.6489	0.000325287	STS	STS	412	steroid sulfatase (microsomal), isozyme S	STS	0.473793	0.469949	-0.262508	-0.236761	STS	4.42844	4.42844	0.471871	2.68569	2.68579	-0.249634	STS	4.43434	0.473793	4.42254	0.469949	2.66183	-0.262508	2.70976	-0.236761	STS	280.132	279.386	168.157	171.184
CPNE7	-1.64885	0.397165	1.64885	0.397165	CPNE7	CPNE7	27132	copine VII	CPNE7	0.282033	0.268406	0.228919	-1.12139	CPNE7	5.8697	5.86977	0.275219	3.55989	3.95687	-0.446237	CPNE7	5.89749	0.282033	5.84205	0.268406	5.68432	0.228919	2.22943	-1.12139	CPNE7	137.064	141.228	130.885	53.7439
EDA	-1.64827	0.490446	1.64827	0.490446	EDA	EDA	1896	ectodysplasin A	EDA	0.351914	0.314086	-1.24858	0.472676	EDA	0.400322	0.400357	0.333	0.242874	0.287386	-0.387952	EDA	0.405605	0.351914	0.395108	0.314086	0.133754	-1.24858	0.441018	0.472676	EDA	21.0099	20.4679	6.93429	22.8909
TCF20	-1.64458	0.0329777	1.64458	0.0329777	TCF20	TCF20	6942	transcription factor 20 (AR1)	TCF20	-0.00648257	0.0831223	-0.805333	-0.553467	TCF20	1.74004	1.74087	0.0383199	1.05804	1.06208	-0.6794	TCF20	1.68683	-0.00648257	1.79492	0.0831223	0.969602	-0.805333	1.15455	-0.553467	TCF20	124.058	129.971	70.2097	83.6016
ZNF441	-1.64428	0.0695572	1.64428	0.0695572	ZNF441	ZNF441	126068	zinc finger protein 441	ZNF441	0.0891322	0.20887	-0.75907	-0.377837	ZNF441	5.01988	5.02421	0.149001	3.05294	3.07963	-0.568454	ZNF441	4.81583	0.0891322	5.23258	0.20887	2.67508	-0.75907	3.48417	-0.377837	ZNF441	209.098	227.193	116.149	151.279
AKR1C2	-1.64348	0.437893	1.64348	0.437893	AKR1C2	AKR1C2	1646	aldo-keto reductase family 1, member C2 (dihydrodiol dehydrogenase 2; bile acid binding protein; 3-alpha hydroxysteroid dehydrogenase, type III)	AKR1C2	0.483529	0.476033	0.508738	-0.98269	AKR1C2	33.1024	33.1025	0.479781	20.1416	22.8927	-0.236976	AKR1C2	33.1885	0.483529	33.0165	0.476033	33.7735	0.508738	12.0119	-0.98269	AKR1C2	828.389	765.498	829.514	305.544
C11orf35	-1.64247	0.665985	1.64247	0.665985	C11orf35	C11orf35	256329	chromosome 11 open reading frame 35	C11orf35	0.779366	-0.187955	0.923909	-1.76422	C11orf35	2.14426	2.26589	0.295705	1.30551	1.91425	-0.420158	C11orf35	2.99829	0.779366	1.53349	-0.187955	3.31425	0.923909	0.514253	-1.76422	C11orf35	58.0273	29.6784	64.1422	9.95257
FAM155A	-1.64067	0.175604	1.64067	0.175604	FAM155A	FAM155A	728215	family with sequence similarity 155, member A	FAM155A	0.632951	0.0806715	-0.147713	-0.567231	FAM155A	4.24283	4.32079	0.356811	2.58604	2.61342	-0.357472	FAM155A	5.13786	0.632951	3.50372	0.0806715	2.99074	-0.147713	2.2361	-0.567231	FAM155A	192.09	130.994	111.815	83.6016
ZNF20	-1.64043	0.0740917	1.64043	0.0740917	ZNF20	ZNF20	7568	zinc finger protein 20	ZNF20	-0.120705	0.141838	-0.862258	-0.544751	ZNF20	2.3125	2.32207	0.0105665	1.40969	1.41824	-0.703504	ZNF20	2.11137	-0.120705	2.53278	0.141838	1.2628	-0.862258	1.57367	-0.544751	ZNF20	61.4278	73.6843	36.7566	45.7818
LOC202181	-1.64019	0.608349	1.64019	0.608349	LOC202181	LOC202181	202181	chromosome 5 open reading frame 25 pseudogene	LOC202181	-1.10742	0.597689	-0.144427	-1.79303	LOC202181	1.06557	1.2571	-0.254865	0.649661	0.75862	-0.968728	LOC202181	0.590115	-1.10742	1.92409	0.597689	1.15034	-0.144427	0.3669	-1.79303	LOC202181	16.0075	52.193	31.2043	9.95257
C2orf76	-1.63993	0.0755157	1.63993	0.0755157	C2orf76	C2orf76	130355	chromosome 2 open reading frame 76	C2orf76	0.133653	0.435944	-0.285821	-0.571857	C2orf76	10.6751	10.7338	0.284799	6.50949	6.5415	-0.428839	C2orf76	9.61333	0.133653	11.8542	0.435944	7.18786	-0.285821	5.89514	-0.571857	C2orf76	73.0343	90.0586	54.6075	44.7865
DLC1	-1.63877	0.351615	1.63877	0.351615	DLC1	DLC1	10395	deleted in liver cancer 1	DLC1	0.869321	1.65544	0.991989	0.10755	DLC1	5.19744	5.39153	1.26238	3.17156	3.32172	0.549769	DLC1	3.95792	0.869321	6.82514	1.65544	4.30917	0.991989	2.33427	0.10755	DLC1	228.107	396.053	247.901	135.355
FBXW4	-1.63774	0.0367787	1.63774	0.0367787	FBXW4	FBXW4	6468	F-box and WD repeat domain containing 4	FBXW4	0.401858	0.307783	-0.22461	-0.489167	FBXW4	5.04931	5.052	0.35482	3.08309	3.09606	-0.356888	FBXW4	5.21665	0.401858	4.88734	0.307783	3.37914	-0.22461	2.81298	-0.489167	FBXW4	107.05	100.293	69.3429	57.7249
DFNB59	-1.63736	0.570612	1.63736	0.570612	DFNB59	DFNB59	494513	deafness, autosomal recessive 59	DFNB59	0.650447	0.248752	0.776966	-1.30051	DFNB59	3.22979	3.26113	0.4496	1.97256	2.50632	-0.26177	DFNB59	3.71223	0.650447	2.81004	0.248752	4.05248	0.776966	0.96015	-1.30051	DFNB59	50.0236	37.8662	54.6085	12.9383
ANKRD34A	-1.63647	0.149856	1.63647	0.149856	ANKRD34A	ANKRD34A	284615	ankyrin repeat domain 34A	ANKRD34A	0.365369	0.745974	0.0913245	-0.401159	ANKRD34A	0.720466	0.726743	0.555672	0.440256	0.446684	-0.154917	ANKRD34A	0.631432	0.365369	0.822054	0.745974	0.522193	0.0913245	0.371175	-0.401159	ANKRD34A	22.0103	28.655	18.2025	12.9383
ZNF805	-1.63576	0.268875	1.63576	0.268875	ZNF805	ZNF805	390980	zinc finger protein 805	ZNF805	0.52349	-0.347782	-0.449857	-0.794352	ZNF805	1.93268	2.02146	0.0878539	1.18152	1.18995	-0.622105	ZNF805	2.61396	0.52349	1.42896	-0.347782	1.33135	-0.449857	1.04855	-0.794352	ZNF805	263.124	143.275	135.219	106.492
APOBEC2	-1.63415	0.300397	1.63415	0.300397	APOBEC2	APOBEC2	10930	apolipoprotein B mRNA editing enzyme, catalytic polypeptide-like 2	APOBEC2	-0.284753	0.595924	-0.813616	-0.292294	APOBEC2	0.464861	0.486683	0.155585	0.284467	0.289123	-0.552955	APOBEC2	0.342585	-0.284753	0.630781	0.595924	0.237446	-0.813616	0.340799	-0.292294	APOBEC2	5.00235	9.21054	3.46714	4.97628
CATSPER1	-1.63415	0.476756	1.63415	0.476756	CATSPER1	CATSPER1	117144	cation channel, sperm associated 1	CATSPER1	-0.565556	1.05208	-0.357451	-0.5731	CATSPER1	0.212964	0.247317	0.243263	0.130321	0.130685	-0.465276	CATSPER1	0.12157	-0.565556	0.373065	1.05208	0.140434	-0.357451	0.120936	-0.5731	CATSPER1	3.00141	9.21054	3.46714	2.98577
FLJ20021	-1.63415	0.223181	1.63415	0.223181	FLJ20021	FLJ20021	90024	uncharacterized LOC90024	FLJ20021	0.466818	0.329577	0.0899637	-0.710645	FLJ20021	1.43353	1.43515	0.398198	0.877233	0.911219	-0.310341	FLJ20021	1.50336	0.466818	1.36694	0.329577	1.15776	0.0899637	0.664678	-0.710645	FLJ20021	9.00423	8.18714	6.93429	3.98103
GUSBP4	-1.63415	0.583972	1.63415	0.583972	GUSBP4	GUSBP4	375513	glucuronidase, beta pseudogene 4	GUSBP4	-0.9824	0.89828	-0.189329	-1.31187	GUSBP4	1.66834	2.03545	-0.0420598	1.02092	1.09916	-0.750597	GUSBP4	0.869388	-0.9824	3.20151	0.89828	1.50644	-0.189329	0.691886	-1.31187	GUSBP4	5.00235	18.4211	8.66786	3.98103
INE1	-1.63415	0.385356	1.63415	0.385356	INE1	INE1	8552	inactivation escape 1 (non-protein coding)	INE1	0.263075	0.00625019	0.0561464	-1.2039	INE1	2.45825	2.468	0.134663	1.5043	1.65004	-0.573874	INE1	2.68709	0.263075	2.2489	0.00625019	2.32804	0.0561464	0.972031	-1.2039	INE1	22.0103	18.4211	19.0693	7.96205
NPW	-1.63415	0.513793	1.63415	0.513793	NPW	NPW	283869	neuropeptide W	NPW	0.30591	0.338591	0.514016	-1.28659	NPW	0.366925	0.366949	0.32225	0.224537	0.269695	-0.386286	NPW	0.362793	0.30591	0.371105	0.338591	0.419088	0.514016	0.120301	-1.28659	NPW	3.00141	3.07018	3.46714	0.995257
LMBR1L	-1.63206	0.349157	1.63206	0.349157	LMBR1L	LMBR1L	55716	limb region 1 homolog (mouse)-like	LMBR1L	-0.0374392	-0.00476201	-0.145111	-1.31048	LMBR1L	16.2379	16.2389	-0.0211006	9.94929	10.7719	-0.727796	LMBR1L	16.055	-0.0374392	16.4228	-0.00476201	14.9004	-0.145111	6.64334	-1.31048	LMBR1L	351.165	359.211	325.912	145.307
ADAP2	-1.63198	0.156087	1.63198	0.156087	ADAP2	ADAP2	55803	ArfGAP with dual PH domains 2	ADAP2	-0.0844863	0.375616	-0.342041	-0.780081	ADAP2	2.61562	2.64894	0.145565	1.60273	1.62123	-0.561061	ADAP2	2.23009	-0.0844863	3.0678	0.375616	1.86548	-0.342041	1.37698	-0.780081	ADAP2	58.0273	79.8247	48.54	35.8292
LOC100129534	-1.63051	0.0313043	1.63051	0.0313043	LOC100129534	LOC100129534	100129534	small nuclear ribonucleoprotein polypeptide N pseudogene	LOC100129534	0.223994	0.0640307	-0.661009	-0.461616	LOC100129534	0.362484	0.363041	0.144012	0.222313	0.222844	-0.561312	LOC100129534	0.383147	0.223994	0.342935	0.0640307	0.207469	-0.661009	0.238219	-0.461616	LOC100129534	8.00376	7.16375	4.33393	4.97628
MAP2K7	-1.63051	0.42216	1.63051	0.42216	MAP2K7	MAP2K7	5609	mitogen-activated protein kinase kinase 7	MAP2K7	0.0904903	0.345564	0.205489	-1.18008	MAP2K7	0.809585	0.81275	0.218027	0.496523	0.554879	-0.487295	MAP2K7	0.741088	0.0904903	0.884412	0.345564	0.802579	0.205489	0.307178	-1.18008	MAP2K7	24.0113	28.655	26.0036	9.95257
SLC7A11	-1.62921	0.447351	1.62921	0.447351	SLC7A11	SLC7A11	23657	solute carrier family 7 (anionic amino acid transporter light chain, xc- system), member 11	SLC7A11	-0.0604251	1.44011	-0.044817	0.0161597	SLC7A11	7.54959	8.59369	0.689842	4.6339	4.63494	-0.0143287	SLC7A11	4.48818	-0.0604251	12.6992	1.44011	4.537	-0.044817	4.73287	0.0161597	SLC7A11	433.874	1227.63	438.594	457.528
CDH2	-1.62813	0.245014	1.62813	0.245014	CDH2	CDH2	1000	cadherin 2, type 1, N-cadherin (neuronal)	CDH2	1.28508	1.91729	1.19225	0.603692	CDH2	25.9407	26.5659	1.60119	15.9328	16.2655	0.897972	CDH2	20.8365	1.28508	32.2953	1.91729	19.538	1.19225	12.9929	0.603692	CDH2	887.417	1375.44	832.115	553.363
DISC1	-1.6277	0.57987	1.6277	0.57987	DISC1	DISC1	27185	disrupted in schizophrenia 1	DISC1	0.48855	0.0868361	-1.46964	0.639355	DISC1	1.16779	1.17913	0.287693	0.71745	0.917783	-0.415142	DISC1	1.34224	0.48855	1.01602	0.0868361	0.345427	-1.46964	1.49014	0.639355	DISC1	77.0351	36.9937	14.4815	84.5306
RCN3	-1.62715	0.208061	1.62715	0.208061	RCN3	RCN3	57333	reticulocalbin 3, EF-hand calcium binding domain	RCN3	0.384248	0.202808	-0.0368051	-0.780827	RCN3	1.61648	1.61967	0.293528	0.993443	1.02665	-0.408816	RCN3	1.72139	0.384248	1.51796	0.202808	1.28567	-0.0368051	0.767638	-0.780827	RCN3	29.0136	25.5848	21.6697	12.9383
RAD23B	-1.62401	0.500741	1.62401	0.500741	RAD23B	RAD23B	5887	RAD23 homolog B (S. cerevisiae)	RAD23B	0.00868225	0.481095	0.370671	-1.28002	RAD23B	16.2585	16.4769	0.244888	10.0114	11.6948	-0.454673	RAD23B	13.8031	0.00868225	19.1508	0.481095	17.7397	0.370671	5.64988	-1.28002	RAD23B	529.249	733.773	676.96	221.942
METAP1D	-1.62289	0.30262	1.62289	0.30262	METAP1D	METAP1D	254042	methionyl aminopeptidase type 1D (mitochondrial)	METAP1D	-0.153472	0.837386	-0.46732	-0.245901	METAP1D	7.27134	7.70432	0.341957	4.48048	4.49368	-0.356611	METAP1D	5.15793	-0.153472	10.2507	0.837386	4.14952	-0.46732	4.83784	-0.245901	METAP1D	70.0329	139.181	56.3411	65.6869
PAR-SN	-1.62275	0.390833	1.62275	0.390833	PAR-SN	PAR-SN	347746	paternally expressed transcript PAR-SN	PAR-SN	0.510612	-0.442766	-0.23307	-1.09597	PAR-SN	4.55123	4.80194	0.0339231	2.80464	2.93099	-0.664518	PAR-SN	6.33325	0.510612	3.27063	-0.442766	3.7823	-0.23307	2.07969	-1.09597	PAR-SN	103.048	53.2164	61.5418	33.8387
GDF15	-1.62269	0.528067	1.62269	0.528067	GDF15	GDF15	9518	growth differentiation factor 15	GDF15	0.362279	0.333308	0.57184	-1.27302	GDF15	193.466	193.476	0.347793	119.225	144.437	-0.350592	GDF15	195.418	0.362279	191.533	0.333308	225.969	0.57184	62.9056	-1.27302	GDF15	1984.93	1945.47	2295.25	638.955
LOC400604	-1.62033	0.42291	1.62033	0.42291	LOC400604				LOC400604	0.352866	0.303667	0.328304	-1.06435	LOC400604	3.55353	3.55404	0.328267	2.19308	2.45353	-0.368025	LOC400604	3.61464	0.352866	3.49345	0.303667	3.55362	0.328304	1.35344	-1.06435	LOC400604	44.6736	43.1758	43.9195	16.7273
IPO7	-1.61969	0.30985	1.61969	0.30985	IPO7	IPO7	10527	importin 7	IPO7	-0.0970275	0.387086	-0.095169	-1.0062	IPO7	7.93603	8.04799	0.145029	4.89973	5.146	-0.550684	IPO7	6.71022	-0.0970275	9.38576	0.387086	6.71887	-0.095169	3.57313	-1.0062	IPO7	411.193	575.147	411.723	218.956
LOC646762	-1.61803	0.108401	1.61803	0.108401	LOC646762	LOC646762	646762	uncharacterized LOC646762	LOC646762	0.0718093	0.343924	-0.277451	-0.695298	LOC646762	3.71603	3.73257	0.207867	2.29664	2.32076	-0.486374	LOC646762	3.3816	0.0718093	4.08354	0.343924	2.65451	-0.277451	1.98701	-0.695298	LOC646762	193.091	233.172	151.574	113.459
ZNF653	-1.61704	0.297373	1.61704	0.297373	ZNF653	ZNF653	115950	zinc finger protein 653	ZNF653	0.723327	-0.0436886	-0.038191	-0.668874	ZNF653	1.73234	1.79391	0.339819	1.0713	1.097	-0.353532	ZNF653	2.25985	0.723327	1.32796	-0.0436886	1.33303	-0.038191	0.860965	-0.668874	ZNF653	47.0221	27.6316	27.7372	17.9146
SLIT2	-1.61703	0.140692	1.61703	0.140692	SLIT2	SLIT2	9353	slit homolog 2 (Drosophila)	SLIT2	0.0873225	0.609806	-0.214766	-0.474803	SLIT2	1.16056	1.17964	0.348564	0.717708	0.720625	-0.344784	SLIT2	0.968334	0.0873225	1.39094	0.609806	0.785394	-0.214766	0.655856	-0.474803	SLIT2	47.0221	67.5439	38.1386	31.8482
STRN3	-1.61696	0.209244	1.61696	0.209244	STRN3	STRN3	29966	striatin, calmodulin binding protein 3	STRN3	-0.223386	0.534827	-0.5546	-0.520528	STRN3	13.7464	14.2238	0.155721	8.50139	8.50198	-0.537564	STRN3	10.5698	-0.223386	17.8777	0.534827	8.40159	-0.5546	8.60237	-0.520528	STRN3	407.191	700.004	325.045	339.383
FNDC8	-1.61589	0.185576	1.61589	0.185576	FNDC8	FNDC8	54752	fibronectin type III domain containing 8	FNDC8	0.201361	-0.0554646	-0.295077	-0.943682	FNDC8	0.857236	0.860634	0.0729482	0.530505	0.543964	-0.619379	FNDC8	0.937037	0.201361	0.784232	-0.0554646	0.664223	-0.295077	0.423706	-0.943682	FNDC8	11.0052	9.21054	7.80107	4.97628
CALB1	-1.61589	0.458228	1.61589	0.458228	CALB1	CALB1	793	calbindin 1, 28kDa	CALB1	0.814312	-0.612437	-0.852048	-0.330729	CALB1	0.282162	0.317365	0.100938	0.174617	0.177475	-0.591388	CALB1	0.462642	0.814312	0.172088	-0.612437	0.145754	-0.852048	0.209196	-0.330729	CALB1	11.0052	4.09357	3.46714	4.97628
ZNF397	-1.61566	0.0667675	1.61566	0.0667675	ZNF397	ZNF397	84307	zinc finger protein 397	ZNF397	0.457227	0.584387	0.0060396	-0.348678	ZNF397	8.38287	8.39101	0.520807	5.1885	5.22776	-0.171319	ZNF397	8.02146	0.457227	8.76057	0.584387	5.86722	0.0060396	4.5883	-0.348678	ZNF397	200.094	213.985	143.886	114.455
SLITRK5	-1.61409	0.307967	1.61409	0.307967	SLITRK5	SLITRK5	26050	SLIT and NTRK-like family, member 5	SLITRK5	0.534684	0.645366	0.405757	-0.607155	SLITRK5	2.15591	2.1575	0.590025	1.33568	1.41883	-0.100699	SLITRK5	2.07478	0.534684	2.24022	0.645366	1.89741	0.405757	0.940252	-0.607155	SLITRK5	90.0423	97.2223	82.3447	40.8055
KLHL24	-1.61291	0.492916	1.61291	0.492916	KLHL24	KLHL24	54800	kelch-like 24 (Drosophila)	KLHL24	0.562052	0.0818745	0.425659	-1.16107	KLHL24	15.3009	15.5133	0.321963	9.48652	10.9574	-0.367706	KLHL24	18.0714	0.562052	12.9552	0.0818745	16.4412	0.425659	5.47369	-1.16107	KLHL24	1317.62	944.592	1198.77	399.098
FSD1L	-1.61291	0.0552423	1.61291	0.0552423	FSD1L	FSD1L	83856	fibronectin type III and SPRY domain containing 1-like	FSD1L	0.0426239	0.380938	-0.474583	-0.48119	FSD1L	6.43858	6.48289	0.211781	3.9919	3.99191	-0.477887	FSD1L	5.72623	0.0426239	7.23955	0.380938	4.00105	-0.474583	3.98277	-0.48119	FSD1L	136.064	143.275	111.815	77.63
LRIG3	-1.61245	0.17044	1.61245	0.17044	LRIG3	LRIG3	121227	leucine-rich repeats and immunoglobulin-like domains 3	LRIG3	0.2728	0.530165	0.0140149	-0.589562	LRIG3	7.88722	7.91862	0.401482	4.89145	4.99886	-0.287773	LRIG3	7.21418	0.2728	8.62306	0.530165	6.02955	0.0140149	3.96817	-0.589562	LRIG3	259.122	315.205	216.697	142.322
PRDM15	-1.6124	0.13194	1.6124	0.13194	PRDM15	PRDM15	63977	PR domain containing 15	PRDM15	-0.0283308	0.478793	-0.57971	-0.348255	PRDM15	2.04175	2.07337	0.225231	1.26628	1.27035	-0.463983	PRDM15	1.71267	-0.0283308	2.43407	0.478793	1.16867	-0.57971	1.37204	-0.348255	PRDM15	113.053	160.673	77.144	90.5684
KLHL7-AS1	-1.61081	0.348894	1.61081	0.348894	KLHL7-AS1	KLHL7-AS1	100775104	KLHL7 antisense RNA 1	KLHL7-AS1	0.239647	0.845512	-0.624396	0.33399	KLHL7-AS1	2.0975	2.14391	0.54258	1.30214	1.37464	-0.145203	KLHL7-AS1	1.70024	0.239647	2.58758	0.845512	0.93413	-0.624396	1.81514	0.33399	KLHL7-AS1	41.0193	62.427	22.5364	43.7913
MRVI1-AS1	-1.60969	0.164589	1.60969	0.164589	MRVI1-AS1	MRVI1-AS1	100129827	MRVI1 antisense RNA 1	MRVI1-AS1	0.507152	0.12477	-0.114842	-0.626807	MRVI1-AS1	0.825017	0.832272	0.315961	0.512531	0.52062	-0.370824	MRVI1-AS1	0.941927	0.507152	0.722618	0.12477	0.612038	-0.114842	0.429202	-0.626807	MRVI1-AS1	4.00188	3.07018	2.60036	1.99051
TTLL4	-1.60811	0.165105	1.60811	0.165105	TTLL4	TTLL4	9654	tubulin tyrosine ligase-like family, member 4	TTLL4	-0.187549	0.451356	-0.548429	-0.558489	TTLL4	6.28921	6.44402	0.131903	3.91094	3.91097	-0.553459	TTLL4	5.04001	-0.187549	7.84803	0.451356	3.9246	-0.548429	3.89733	-0.558489	TTLL4	247.116	384.796	192.427	191.089
ZBTB26	-1.60782	0.42348	1.60782	0.42348	ZBTB26	ZBTB26	57684	zinc finger and BTB domain containing 26	ZBTB26	-0.278102	0.418975	-0.0231294	-1.20621	ZBTB26	3.8739	3.9875	0.070437	2.40941	2.6148	-0.614668	ZBTB26	3.04248	-0.278102	4.93252	0.418975	3.63063	-0.0231294	1.59897	-1.20621	ZBTB26	53.0249	85.965	63.2754	27.8672
MCC	-1.60369	0.462336	1.60369	0.462336	MCC	MCC	4163	mutated in colorectal cancers	MCC	1.01715	-0.467985	-0.546424	-0.26719	MCC	0.458962	0.521112	0.274584	0.286192	0.287533	-0.406807	MCC	0.767914	1.01715	0.27431	-0.467985	0.259794	-0.546424	0.315273	-0.26719	MCC	64.0301	22.5146	22.5364	25.8768
LIF	-1.60308	0.255906	1.60308	0.255906	LIF	LIF	3976	leukemia inhibitory factor	LIF	-0.153078	0.711004	-0.388578	-0.415188	LIF	7.24584	7.57318	0.278963	4.51995	4.52015	-0.401883	LIF	5.37071	-0.153078	9.77566	0.711004	4.56183	-0.388578	4.47846	-0.415188	LIF	204.096	371.492	173.357	170.189
CCT6P3	-1.60307	0.539917	1.60307	0.539917	CCT6P3	CCT6P3	643180	chaperonin containing TCP1, subunit 6 (zeta) pseudogene 3	CCT6P3	0.293051	0.399738	0.593085	-1.26197	CCT6P3	1.89221	1.8935	0.346394	1.18036	1.43283	-0.334443	CCT6P3	1.82352	0.293051	1.96348	0.399738	2.24507	0.593085	0.620586	-1.26197	CCT6P3	38.0179	40.9357	46.8064	12.9383
VPS13D	-1.60275	0.0287772	1.60275	0.0287772	VPS13D	VPS13D	55187	vacuolar protein sorting 13 homolog D (S. cerevisiae)	VPS13D	0.169104	0.0363322	-0.480265	-0.675397	VPS13D	2.57607	2.5788	0.102718	1.60728	1.61096	-0.577831	VPS13D	2.69738	0.169104	2.46022	0.0363322	1.71974	-0.480265	1.50218	-0.675397	VPS13D	443.208	404.24	282.572	246.824
MAP6	-1.60188	0.513307	1.60188	0.513307	MAP6	MAP6	4135	microtubule-associated protein 6	MAP6	0.313868	-0.226569	0.183233	-1.45547	MAP6	0.485633	0.494177	0.0436498	0.303164	0.353384	-0.636119	MAP6	0.585669	0.313868	0.402684	-0.226569	0.534967	0.183233	0.171802	-1.45547	MAP6	16.0075	11.2573	18.2025	5.97154
CEP152	-1.60014	0.199182	1.60014	0.199182	CEP152	CEP152	22995	centrosomal protein 152kDa	CEP152	-0.00755036	0.701755	-0.384489	-0.277709	CEP152	12.8217	13.2111	0.347102	8.01283	8.01832	-0.331099	CEP152	10.0273	-0.00755036	16.3948	0.701755	7.72172	-0.384489	8.31492	-0.277709	CEP152	543.255	898.539	420.391	458.813
NEK9	-1.59961	0.179309	1.59961	0.179309	NEK9	NEK9	91754	NIMA (never in mitosis gene a)- related kinase 9	NEK9	0.123099	0.43297	-0.104206	-0.695172	NEK9	13.0897	13.1653	0.278035	8.18303	8.35526	-0.399689	NEK9	11.7568	0.123099	14.5737	0.43297	10.043	-0.104206	6.66753	-0.695172	NEK9	642.302	796.2	548.676	364.264
RAPH1	-1.59906	0.0240344	1.59906	0.0240344	RAPH1	RAPH1	65059	Ras association (RalGDS/AF-6) and pleckstrin homology domains 1	RAPH1	0.283021	0.239462	-0.520669	-0.311297	RAPH1	2.32759	2.32786	0.261242	1.4556	1.45944	-0.415983	RAPH1	2.363	0.283021	2.29272	0.239462	1.35372	-0.520669	1.56515	-0.311297	RAPH1	142.067	145.322	91.0125	104.502
LOC100272217	-1.59885	0.415947	1.59885	0.415947	LOC100272217	LOC100272217	100272217	uncharacterized LOC100272217	LOC100272217	-0.29917	0.955906	-0.127586	-0.56974	LOC100272217	4.67558	5.12492	0.328368	2.92435	2.95875	-0.348663	LOC100272217	3.02641	-0.29917	7.22343	0.955906	3.40863	-0.127586	2.50887	-0.56974	LOC100272217	60.0282	143.275	67.6093	49.7628
GTF2A1	-1.59867	0.199448	1.59867	0.199448	GTF2A1	GTF2A1	2957	general transcription factor IIA, 1, 19/37kDa	GTF2A1	-0.146886	0.418943	-0.760673	-0.321021	GTF2A1	9.03851	9.21285	0.136029	5.65375	5.71951	-0.540847	GTF2A1	7.42901	-0.146886	10.9967	0.418943	4.8547	-0.760673	6.58432	-0.321021	GTF2A1	105.049	147.369	72.81	88.5778
CBLB	-1.59845	0.161704	1.59845	0.161704	CBLB	CBLB	868	Cbl proto-oncogene, E3 ubiquitin protein ligase B	CBLB	0.521714	0.136255	-0.103356	-0.592022	CBLB	3.51638	3.5478	0.328985	2.19987	2.23149	-0.347689	CBLB	4.01895	0.521714	3.07665	0.136255	2.60584	-0.103356	1.85714	-0.592022	CBLB	155.073	118.714	100.547	71.6585
TPI1P2	-1.59709	0.407282	1.59709	0.407282	TPI1P2	TPI1P2	286016	triosephosphate isomerase 1 pseudogene 2	TPI1P2	0.641861	0.411505	-0.787463	0.489935	TPI1P2	2.09434	2.10102	0.526683	1.31135	1.44197	-0.148764	TPI1P2	2.2684	0.641861	1.93364	0.411505	0.842268	-0.787463	2.04167	0.489935	TPI1P2	42.0198	35.8188	15.6021	37.8198
LOXL4	-1.5969	0.523007	1.5969	0.523007	LOXL4	LOXL4	84171	lysyl oxidase-like 4	LOXL4	-1.6631	-0.0209931	-1.8335	-1.20114	LOXL4	1.95175	2.27645	-0.842044	1.22221	1.25168	-1.51732	LOXL4	1.10475	-1.6631	3.44815	-0.0209931	0.981676	-1.8335	1.52169	-1.20114	LOXL4	39.0183	121.784	34.6714	53.7439
GCFC1	-1.59687	0.161886	1.59687	0.161886	GCFC1	GCFC1	94104	GC-rich sequence DNA-binding factor 1	GCFC1	-0.094805	0.456928	-0.351098	-0.637265	GCFC1	16.9212	17.2314	0.181061	10.5965	10.6486	-0.494181	GCFC1	13.9761	-0.094805	20.4868	0.456928	11.7013	-0.351098	9.59598	-0.637265	GCFC1	533.251	744.007	454.196	365.259
TBX2	-1.59684	0.512176	1.59684	0.512176	TBX2	TBX2	6909	T-box 2	TBX2	-0.843422	0.373683	-1.50979	-0.310394	TBX2	0.516592	0.563236	-0.234869	0.323509	0.351863	-0.91009	TBX2	0.338809	-0.843422	0.787662	0.373683	0.213481	-1.50979	0.490244	-0.310394	TBX2	11.0052	25.5848	6.93429	15.9241
STEAP2	-1.59673	0.515468	1.59673	0.515468	STEAP2	STEAP2	261729	STEAP family member 2, metalloreductase	STEAP2	0.418338	0.360875	0.575873	-1.1469	STEAP2	1.60016	1.60048	0.389607	1.00215	1.18615	-0.285513	STEAP2	1.63235	0.418338	1.56861	0.360875	1.82069	0.575873	0.551607	-1.1469	STEAP2	74.0348	65.4972	91.8793	27.8672
MAP4K4	-1.59537	0.505139	1.59537	0.505139	MAP4K4	MAP4K4	9448	mitogen-activated protein kinase kinase kinase kinase 4	MAP4K4	-0.678122	0.817853	-0.979106	-0.228954	MAP4K4	10.3529	11.7758	0.0698655	6.48934	6.70988	-0.60403	MAP4K4	6.16448	-0.678122	17.3872	0.817853	5.0037	-0.979106	8.41607	-0.228954	MAP4K4	456.214	1278.22	368.384	628.007
AKAP3	-1.59445	0.285311	1.59445	0.285311	AKAP3	AKAP3	10566	A kinase (PRKA) anchor protein 3	AKAP3	0.519763	0.832547	-0.435634	0.441826	AKAP3	1.62634	1.6359	0.676155	1.02	1.06753	0.00309618	AKAP3	1.45926	0.519763	1.81255	0.832547	0.75254	-0.435634	1.38252	0.441826	AKAP3	42.0198	52.193	21.6697	39.8103
ZNF169	-1.59344	0.623131	1.59344	0.623131	ZNF169	ZNF169	169841	zinc finger protein 169	ZNF169	0.565652	-0.175388	0.630807	-1.58484	ZNF169	1.19632	1.23599	0.195132	0.750774	0.983212	-0.477017	ZNF169	1.54662	0.565652	0.925355	-0.175388	1.61807	0.630807	0.348354	-1.58484	ZNF169	53.0249	31.7252	55.4743	11.9431
CCR10	-1.59329	0.363416	1.59329	0.363416	CCR10	CCR10	2826	chemokine (C-C motif) receptor 10	CCR10	0.435423	-0.183969	-0.061011	-1.03154	CCR10	1.67405	1.71277	0.125727	1.05069	1.11069	-0.546277	CCR10	2.07489	0.435423	1.35064	-0.183969	1.4708	-0.061011	0.750575	-1.03154	CCR10	22.0103	14.3275	15.6021	7.96205
CCDC71	-1.5918	0.697466	1.5918	0.697466	CCDC71	CCDC71	64925	coiled-coil domain containing 71	CCDC71	0.0500957	0.750201	1.18196	-1.72298	CCDC71	1.31988	1.35892	0.400148	0.829176	1.28612	-0.270509	CCDC71	1.03552	0.0500957	1.68233	0.750201	2.26926	1.18196	0.302977	-1.72298	CCDC71	17.008	27.6316	37.2718	4.97628
MRC2	-1.59129	0.503041	1.59129	0.503041	MRC2	MRC2	9902	mannose receptor, C type 2	MRC2	0.233728	0.484054	0.506683	-1.12929	MRC2	9.61627	9.65248	0.358891	6.04307	7.04071	-0.311304	MRC2	8.81716	0.233728	10.4878	0.484054	10.6536	0.506683	3.42783	-1.12929	MRC2	522.246	621.2	631.02	203.032
GHRLOS	-1.59092	0.713961	1.59092	0.713961	GHRLOS	GHRLOS	100126793	ghrelin opposite strand/antisense RNA	GHRLOS	-1.04768	1.98451	-0.669632	0.266744	GHRLOS	0.438689	0.704049	0.468413	0.275746	0.290394	-0.201444	GHRLOS	0.153379	-1.04768	1.25472	1.98451	0.199329	-0.669632	0.381459	0.266744	GHRLOS	2.00094	17.3977	2.60035	4.97627
AGER	-1.59017	0.328503	1.59017	0.328503	AGER	AGER	177	advanced glycosylation end product-specific receptor	AGER	0.41086	0.0870222	0.0761849	-0.916665	AGER	1.33947	1.34792	0.248941	0.842347	0.892709	-0.42024	AGER	1.49857	0.41086	1.19727	0.0870222	1.18831	0.0761849	0.597107	-0.916665	AGER	22.0103	17.3977	14.7354	8.95731
UGT1A6	-1.58998	0.40083	1.58998	0.40083	UGT1A6	UGT1A6	54578	UDP glucuronosyltransferase 1 family, polypeptide A6	UGT1A6	-0.127333	0.324403	0.0199066	-1.16086	UGT1A6	64.7564	65.5516	0.0985354	40.7277	44.1857	-0.570476	UGT1A6	55.3719	-0.127333	75.7313	0.324403	61.3215	0.0199066	27.05	-1.16086	UGT1A6	1281.45	1762.15	1426.73	627.012
C15orf37	-1.58944	0.0565649	1.58944	0.0565649	C15orf37	C15orf37	283687	chromosome 15 open reading frame 37	C15orf37	0.681119	0.364009	-0.0963664	-0.195549	C15orf37	1.25886	1.26647	0.522564	0.792013	0.792481	-0.145958	C15orf37	1.4051	0.681119	1.12784	0.364009	0.819711	-0.0963664	0.765251	-0.195549	C15orf37	26.9921	21.6659	15.7467	14.7005
LOC100129387	-1.58809	0.0648661	1.58809	0.0648661	LOC100129387				LOC100129387	0.132112	0.270074	-0.301274	-0.63112	LOC100129387	5.37598	5.38213	0.201093	3.38519	3.40733	-0.466197	LOC100129387	5.12498	0.132112	5.63927	0.270074	3.79516	-0.301274	3.01951	-0.63112	LOC100129387	205.989	226.66	152.539	121.364
AKR1C1	-1.588	0.520558	1.588	0.520558	AKR1C1	AKR1C1	1645	aldo-keto reductase family 1, member C1 (dihydrodiol dehydrogenase 1; 20-alpha (3-alpha)-hydroxysteroid dehydrogenase)	AKR1C1	1.15906	0.689041	1.08781	-0.574125	AKR1C1	86.9902	88.1469	0.92405	54.7799	64.1206	0.256843	AKR1C1	102.38	1.15906	73.9138	0.689041	97.4467	1.08781	30.7946	-0.574125	AKR1C1	1227.58	886.258	1168.43	369.24
FLVCR2	-1.58762	0.581151	1.58762	0.581151	FLVCR2	FLVCR2	55640	feline leukemia virus subgroup C cellular receptor family, member 2	FLVCR2	0.66406	0.64703	1.01094	-1.03358	FLVCR2	5.13366	5.13375	0.655545	3.23357	4.07986	-0.0113164	FLVCR2	5.16405	0.66406	5.10345	0.64703	6.56769	1.01094	1.59203	-1.03358	FLVCR2	182.086	151.462	208.895	49.7628
NRSN2	-1.58568	0.323768	1.58568	0.323768	NRSN2	NRSN2	80023	neurensin 2	NRSN2	0.804657	0.0113714	0.0672127	-0.581389	NRSN2	1.32895	1.37949	0.408014	0.838092	0.859356	-0.257088	NRSN2	1.74948	0.804657	1.0095	0.0113714	1.04934	0.0672127	0.669372	-0.581389	NRSN2	39.0183	22.5146	23.4032	14.9288
CCDC11	-1.58536	0.561145	1.58535	0.561145	CCDC11	CCDC11	220136	coiled-coil domain containing 11	CCDC11	1.07784	-0.0414823	0.636444	-0.929697	CCDC11	0.820402	0.882911	0.518179	0.517488	0.595607	-0.146626	CCDC11	1.20921	1.07784	0.556611	-0.0414823	0.890488	0.636444	0.300727	-0.929697	CCDC11	20.0094	9.21054	14.7354	4.97628
MAPK8IP3	-1.58237	0.438899	1.58237	0.438899	MAPK8IP3	MAPK8IP3	23162	mitogen-activated protein kinase 8 interacting protein 3	MAPK8IP3	0.404608	0.0116715	0.208167	-1.11606	MAPK8IP3	2.16383	2.18393	0.20814	1.36746	1.51402	-0.453947	MAPK8IP3	2.47951	0.404608	1.88834	0.0116715	2.16387	0.208167	0.864169	-1.11606	MAPK8IP3	137.064	104.386	119.616	47.7723
GPR18	-1.5823	0.444798	1.5823	0.444798	GPR18	GPR18	2841	G protein-coupled receptor 18	GPR18	-0.277156	0.563483	0.0424814	-1.0802	GPR18	0.359947	0.375332	0.143163	0.227483	0.244921	-0.518861	GPR18	0.268974	-0.277156	0.48169	0.563483	0.335684	0.0424814	0.154159	-1.0802	GPR18	4.00188	7.16375	4.33438	1.99051
RALGDS	-1.5821	0.388264	1.5821	0.388264	RALGDS	RALGDS	5900	ral guanine nucleotide dissociation stimulator	RALGDS	0.0811844	0.161082	0.0631537	-1.14457	RALGDS	11.5638	11.5683	0.121133	7.30916	7.95883	-0.540707	RALGDS	11.248	0.0811844	11.8885	0.161082	11.1083	0.0631537	4.80936	-1.14457	RALGDS	398.187	420.615	392.654	170.189
ZFYVE26	-1.58067	0.0951961	1.58067	0.0951961	ZFYVE26	ZFYVE26	23503	zinc finger, FYVE domain containing 26	ZFYVE26	0.0142461	0.272348	-0.695185	-0.33929	ZFYVE26	1.53482	1.54096	0.143297	0.970994	0.97839	-0.517238	ZFYVE26	1.40349	0.0142461	1.67844	0.272348	0.85832	-0.695185	1.09846	-0.33929	ZFYVE26	136.064	162.719	83.2115	106.492
PRTG	-1.58056	0.0906992	1.58056	0.0906992	PRTG	PRTG	283659	protogenin	PRTG	-0.0452507	0.277528	-0.40419	-0.684404	PRTG	2.04331	2.05611	0.116139	1.29277	1.29888	-0.544297	PRTG	1.82705	-0.0452507	2.28516	0.277528	1.42462	-0.40419	1.17313	-0.684404	PRTG	220.103	275.293	171.624	141.326
ZSWIM4	-1.5793	0.440531	1.5793	0.440531	ZSWIM4	ZSWIM4	65249	zinc finger, SWIM-type containing 4	ZSWIM4	0.427494	0.186002	0.327477	-1.03255	ZSWIM4	1.13107	1.13504	0.306748	0.716185	0.797226	-0.352538	ZSWIM4	1.22981	0.427494	1.04026	0.186002	1.14744	0.327477	0.447013	-1.03255	ZSWIM4	52.0245	44.0059	48.54	18.9099
SCNN1D	-1.57913	0.661468	1.57913	0.661468	SCNN1D	SCNN1D	6339	sodium channel, non-voltage-gated 1, delta subunit	SCNN1D	0.796096	-0.470798	0.63355	-1.62652	SCNN1D	1.46468	1.60815	0.162649	0.927522	1.2269	-0.496483	SCNN1D	2.27211	0.796096	0.944183	-0.470798	2.03001	0.63355	0.42379	-1.62652	SCNN1D	64.0301	26.6082	57.2079	11.9431
SLC25A25	-1.57896	0.143413	1.57896	0.143413	SLC25A25	SLC25A25	114789	solute carrier family 25 (mitochondrial carrier; phosphate carrier), member 25	SLC25A25	0.436004	0.0498607	-0.212296	-0.619792	SLC25A25	5.12877	5.17477	0.242933	3.24819	3.28064	-0.416044	SLC25A25	5.86319	0.436004	4.48635	0.0498607	3.7409	-0.212296	2.82038	-0.619792	SLC25A25	187.088	141.228	116.149	90.5684
MIR5047	-1.57884	0.382435	1.57884	0.382435	MIR5047	MIR5047	100616408	microRNA 5047	MIR5047	0.674449	0.0174692	0.181213	-0.807021	MIR5047	5356.58	5496.03	0.345959	3392.74	3593.68	-0.312904	MIR5047	6726.25	0.674449	4265.82	0.0174692	4778.53	0.181213	2408.83	-0.807021	MIR5047	50.0235	31.7252	35.5382	17.9146
BPIFA2	-1.57873	0.521278	1.57873	0.521278	BPIFA2	BPIFA2	140683	BPI fold containing family A, member 2	BPIFA2	0.190557	-1.36172	-1.60134	-0.887365	BPIFA2	1.41965	1.63009	-0.585583	0.899233	0.926903	-1.24435	BPIFA2	2.43121	0.190557	0.828971	-1.36172	0.702116	-1.60134	1.15169	-0.887365	BPIFA2	21.0099	7.16375	6.0675	9.95257
CCBP2	-1.57873	0.0592993	1.57873	0.0592993	CCBP2	CCBP2	1238	chemokine binding protein 2	CCBP2	0.514441	0.184556	-0.277446	-0.341087	CCBP2	0.284996	0.286861	0.349499	0.180522	0.180566	-0.309267	CCBP2	0.319515	0.514441	0.254206	0.184556	0.184548	-0.277446	0.176584	-0.341087	CCBP2	9.00423	7.16375	5.20072	4.97628
INCENP	-1.5778	0.463427	1.5778	0.463427	INCENP	INCENP	3619	inner centromere protein antigens 135/155kDa	INCENP	-0.452156	1.00511	-0.447582	-0.315289	INCENP	1.56685	1.77096	0.276477	0.993059	0.994103	-0.381435	INCENP	0.945553	-0.452156	2.59637	1.00511	0.948556	-0.447582	1.03965	-0.315289	INCENP	38.0179	104.386	38.1386	41.8008
LOC100506866	-1.57644	0.398821	1.57644	0.398821	LOC100506866				LOC100506866	-0.497152	0.722353	-0.639769	-0.448372	LOC100506866	4.81408	5.25049	0.112601	3.05376	3.06048	-0.544071	LOC100506866	3.15471	-0.497152	7.34627	0.722353	2.85777	-0.639769	3.2632	-0.448372	LOC100506866	120.004	261.47	106.61	123.227
RAB3GAP1	-1.57422	0.41247	1.57422	0.41247	RAB3GAP1	RAB3GAP1	22930	RAB3 GTPase activating protein subunit 1 (catalytic)	RAB3GAP1	-0.323878	0.596632	-0.077086	-0.959443	RAB3GAP1	22.3211	23.4667	0.136377	14.1791	14.8473	-0.518264	RAB3GAP1	16.2243	-0.323878	30.7091	0.596632	19.2512	-0.077086	10.4434	-0.959443	RAB3GAP1	782.368	1480.85	928.328	503.6
NEU3	-1.57181	0.172874	1.57181	0.172874	NEU3	NEU3	10825	sialidase 3 (membrane sialidase)	NEU3	0.322434	0.479106	-0.555187	0.0518641	NEU3	3.16768	3.17236	0.40077	2.0153	2.06007	-0.251661	NEU3	3.00027	0.322434	3.34444	0.479106	1.63294	-0.555187	2.4872	0.0518641	NEU3	78.0367	86.9884	42.4725	64.6917
GPR55	-1.5712	0.078122	1.5712	0.078122	GPR55	GPR55	9290	G protein-coupled receptor 55	GPR55	-0.0798232	0.252418	-0.665263	-0.465873	GPR55	0.393672	0.396285	0.0862972	0.250556	0.251154	-0.565568	GPR55	0.350855	-0.0798232	0.441715	0.252418	0.233826	-0.665263	0.268482	-0.465873	GPR55	13.0061	16.3743	8.66786	9.95257
LACC1	-1.57088	0.017412	1.57088	0.017412	LACC1	LACC1	144811	laccase (multicopper oxidoreductase) domain containing 1	LACC1	0.0643954	-0.109422	-0.668024	-0.680152	LACC1	0.340287	0.340904	-0.0225135	0.216622	0.216623	-0.674088	LACC1	0.361416	0.0643954	0.320393	-0.109422	0.217534	-0.668024	0.215713	-0.680152	LACC1	15.0071	13.3041	8.66786	8.95731
COL6A1	-1.56808	0.456297	1.56808	0.456297	COL6A1	COL6A1	1291	collagen, type VI, alpha 1	COL6A1	-0.386262	0.000955125	-0.160231	-1.52308	COL6A1	3.89403	3.92914	-0.192653	2.4833	2.7655	-0.841657	COL6A1	3.405	-0.386262	4.45329	0.000955125	3.98253	-0.160231	1.54846	-1.52308	COL6A1	140.066	183.187	163.823	63.6964
KCNK3	-1.5672	0.574671	1.5672	0.574671	KCNK3	KCNK3	3777	potassium channel, subfamily K, member 3	KCNK3	-0.660958	1.25415	-0.166482	-0.536706	KCNK3	5.78764	7.10996	0.296598	3.69297	3.72342	-0.351594	KCNK3	2.98022	-0.660958	11.2397	1.25415	4.19856	-0.166482	3.24827	-0.536706	KCNK3	115.054	433.919	162.089	125.402
ATG2A	-1.5666	0.186086	1.5666	0.186086	ATG2A	ATG2A	23130	autophagy related 2A	ATG2A	0.158773	0.135748	-0.173688	-0.827068	ATG2A	2.0752	2.07527	0.147261	1.32465	1.35876	-0.500378	ATG2A	2.09183	0.158773	2.05871	0.135748	1.66129	-0.173688	1.05623	-0.827068	ATG2A	132.062	129.971	104.881	66.6822
FMNL2	-1.56633	0.156728	1.56633	0.156728	FMNL2	FMNL2	114793	formin-like 2	FMNL2	0.44006	0.886568	0.203785	-0.171938	FMNL2	6.33255	6.40853	0.663314	4.04292	4.07724	0.0159234	FMNL2	5.42466	0.44006	7.39239	0.886568	4.60518	0.203785	3.5493	-0.171938	FMNL2	298.14	406.287	253.102	195.07
CALCRL	-1.56616	0.440762	1.56616	0.440762	CALCRL	CALCRL	10203	calcitonin receptor-like	CALCRL	0.332261	0.511786	0.44726	-0.897667	CALCRL	0.608014	0.609191	0.422023	0.388221	0.431163	-0.225204	CALCRL	0.571337	0.332261	0.647045	0.511786	0.618743	0.44726	0.243583	-0.897667	CALCRL	28.0132	31.7252	30.3375	11.9431
QRICH2	-1.56584	0.213702	1.56584	0.213702	QRICH2	QRICH2	84074	glutamine rich 2	QRICH2	0.115114	0.386587	-0.0632478	-0.728924	QRICH2	1.0419	1.04652	0.250851	0.665395	0.683182	-0.396086	QRICH2	0.948345	0.115114	1.14469	0.386587	0.838058	-0.0632478	0.528306	-0.728924	QRICH2	50.0235	60.3802	44.2061	27.8672
PPP4R1L	-1.56534	0.318018	1.56534	0.318018	PPP4R1L	PPP4R1L	55370	protein phosphatase 4, regulatory subunit 1-like	PPP4R1L	0.195599	0.0990022	-0.0113284	-0.987022	PPP4R1L	3.02007	3.02176	0.147301	1.92934	2.0407	-0.499175	PPP4R1L	3.12289	0.195599	2.92064	0.0990022	2.70561	-0.0113284	1.37579	-0.987022	PPP4R1L	70.0329	65.4972	60.675	30.853
MOB1B	-1.56507	0.0385785	1.56507	0.0385785	MOB1B	MOB1B	92597	MOB kinase activator 1B	MOB1B	0.145807	0.272536	-0.322692	-0.551412	MOB1B	3.22317	3.22628	0.209172	2.05945	2.06592	-0.437052	MOB1B	3.08467	0.145807	3.36789	0.272536	2.22934	-0.322692	1.9025	-0.551412	MOB1B	202.095	228.217	155.155	128.388
GOLGA8B	-1.56484	0.544922	1.56484	0.544922	GOLGA8B	GOLGA8B	440270	golgin A8 family, member B	GOLGA8B	0.875352	-0.269557	0.343339	-1.02958	GOLGA8B	9.21817	9.95343	0.302897	5.89079	6.57032	-0.343122	GOLGA8B	13.7079	0.875352	6.19896	-0.269557	9.48023	0.343339	3.6604	-1.02958	GOLGA8B	606.285	274.269	413.457	157.251
C8orf31	-1.56472	0.0711677	1.56472	0.0711677	C8orf31	C8orf31	286122	chromosome 8 open reading frame 31	C8orf31	0.00853613	0.0412184	-0.802469	-0.439577	C8orf31	2.25257	2.25271	0.0248773	1.4396	1.45101	-0.621023	C8orf31	2.2272	0.00853613	2.27823	0.0412184	1.26947	-0.802469	1.63254	-0.439577	C8orf31	38.0179	38.8889	21.6697	27.8672
VPS13B	-1.56466	0.0422774	1.56466	0.0422774	VPS13B	VPS13B	157680	vacuolar protein sorting 13 homolog B (yeast)	VPS13B	0.144778	0.173123	-0.350445	-0.623345	VPS13B	7.98772	7.98811	0.158951	5.1051	5.12795	-0.486895	VPS13B	7.90964	0.144778	8.06658	0.173123	5.61151	-0.350445	4.64439	-0.623345	VPS13B	444.209	375.585	293.84	256.776
LOC254100	-1.56458	0.488876	1.56458	0.488876	LOC254100	LOC254100	254100	uncharacterized LOC254100	LOC254100	0.582303	0.167527	0.468478	-1.0102	LOC254100	1.28742	1.30075	0.374915	0.822854	0.933291	-0.27086	LOC254100	1.48645	0.582303	1.11504	0.167527	1.37368	0.468478	0.492901	-1.0102	LOC254100	15.0071	11.2573	13.8686	4.97628
LOC100505875	-1.56458	0.262882	1.56458	0.262882	LOC100505875	LOC100505875	100505875	uncharacterized LOC100505875	LOC100505875	-0.0264231	0.716759	-0.107822	-0.493388	LOC100505875	1.73175	1.78951	0.345168	1.10685	1.11674	-0.300605	LOC100505875	1.33852	-0.0264231	2.2405	0.716759	1.26509	-0.107822	0.968399	-0.493388	LOC100505875	11.0052	18.4211	10.4014	7.96205
LY6G5B	-1.56457	0.0856854	1.56457	0.0856854	LY6G5B	LY6G5B	58496	lymphocyte antigen 6 complex, locus G5B	LY6G5B	0.0910921	0.190887	-0.700798	-0.308764	LY6G5B	3.75321	3.75545	0.140989	2.39887	2.42104	-0.504781	LY6G5B	3.62562	0.0910921	3.88529	0.190887	2.09411	-0.700798	2.74798	-0.308764	LY6G5B	21.0099	22.5146	12.135	15.9241
ZNF189	-1.56385	0.24219	1.56385	0.24219	ZNF189	ZNF189	7743	zinc finger protein 189	ZNF189	-0.0424421	0.189375	-0.196377	-0.946892	ZNF189	5.79443	5.81314	0.0734663	3.70524	3.83129	-0.571635	ZNF189	5.34711	-0.0424421	6.27918	0.189375	4.80596	-0.196377	2.85662	-0.946892	ZNF189	162.076	191.374	149.087	86.5873
PPP2R4	-1.56299	0.415052	1.56299	0.415052	PPP2R4	PPP2R4	5524	protein phosphatase 2A activator, regulatory subunit 4	PPP2R4	-0.435541	0.805721	-0.34142	-0.577011	PPP2R4	15.7986	17.2831	0.18509	10.108	10.1417	-0.459215	PPP2R4	10.2752	-0.435541	24.2911	0.805721	10.9679	-0.34142	9.31544	-0.577011	PPP2R4	261.123	622.223	279.972	242.843
C17orf61-PLSCR3	-1.56297	0.278163	1.56297	0.278163	C17orf61-PLSCR3	C17orf61-PLSCR3	100529211	C17orf61-PLSCR3 readthrough	C17orf61-PLSCR3	0.529116	0.775837	-0.410829	0.427193	C17orf61-PLSCR3	8.0524	8.08185	0.652477	5.15197	5.3708	0.00818205	C17orf61-PLSCR3	7.39248	0.529116	8.77123	0.775837	3.85335	-0.410829	6.88824	0.427193	C17orf61-PLSCR3	139.361	165.352	72.6421	129.855
CRTC3	-1.56244	0.028711	1.56244	0.028711	CRTC3	CRTC3	64784	CREB regulated transcription coactivator 3	CRTC3	0.281231	0.0588146	-0.481885	-0.465674	CRTC3	5.41575	5.43185	0.170023	3.46621	3.46626	-0.47378	CRTC3	5.84973	0.281231	5.01397	0.0588146	3.44679	-0.481885	3.48574	-0.465674	CRTC3	297.14	254.825	175.091	177.156
C1QTNF1	-1.56239	0.30448	1.56239	0.30448	C1QTNF1	C1QTNF1	114897	C1q and tumor necrosis factor related protein 1	C1QTNF1	0.00891329	-0.568235	-0.552123	-1.2947	C1QTNF1	0.733497	0.74822	-0.279661	0.469472	0.485106	-0.923412	C1QTNF1	0.895917	0.00891329	0.600522	-0.568235	0.607266	-0.552123	0.362945	-1.2947	C1QTNF1	24.0113	15.3509	15.6021	9.95258
THBS4	-1.56236	0.562078	1.56236	0.562078	THBS4	THBS4	7060	thrombospondin 4	THBS4	-0.560607	1.22414	-0.589201	-0.0347153	THBS4	2.28801	2.73984	0.331769	1.46446	1.49158	-0.311958	THBS4	1.23261	-0.560607	4.24707	1.22414	1.20842	-0.589201	1.77474	-0.0347153	THBS4	38.0179	130.994	37.2718	54.7391
TAF15	-1.56216	0.216868	1.56216	0.216868	TAF15	TAF15	8148	TAF15 RNA polymerase II, TATA box binding protein (TBP)-associated factor, 68kDa	TAF15	0.107936	0.487735	-0.0382889	-0.653118	TAF15	15.0698	15.2005	0.297836	9.6468	9.86664	-0.345703	TAF15	13.2112	0.107936	17.1899	0.487735	11.9378	-0.0382889	7.79547	-0.653118	TAF15	263.124	341.813	237.499	155.26
DIP2A	-1.56174	0.257318	1.56174	0.257318	DIP2A	DIP2A	23181	DIP2 disco-interacting protein 2 homolog A (Drosophila)	DIP2A	-0.114026	0.687221	-0.269117	-0.443998	DIP2A	9.57989	9.95163	0.286597	6.13411	6.14538	-0.356558	DIP2A	7.25706	-0.114026	12.6462	0.687221	6.51739	-0.269117	5.77337	-0.443998	DIP2A	426.2	771.638	379.652	323.458
SYTL3	-1.56098	0.150163	1.56098	0.150163	SYTL3	SYTL3	94120	synaptotagmin-like 3	SYTL3	0.0849858	0.647687	-0.29077	-0.261457	SYTL3	1.10459	1.12566	0.366336	0.707625	0.707662	-0.276113	SYTL3	0.908877	0.0849858	1.34244	0.647687	0.700473	-0.29077	0.714851	-0.261457	SYTL3	25.0118	32.7486	16.4689	16.1837
PDZD3	-1.56034	0.688294	1.56034	0.688294	PDZD3	PDZD3	79849	PDZ domain containing 3	PDZD3	1.53011	0.310004	1.51996	-0.963566	PDZD3	4.48528	4.89229	0.920059	2.87455	4.00673	0.278196	PDZD3	6.84596	1.53011	2.93863	0.310004	6.79794	1.51996	1.21552	-0.963566	PDZD3	151.071	64.4738	147.354	25.8767
PLA2G6	-1.56004	0.639793	1.56004	0.639793	PLA2G6	PLA2G6	8398	phospholipase A2, group VI (cytosolic, calcium-independent)	PLA2G6	1.10478	0.0159225	0.959934	-1.12239	PLA2G6	3.33298	3.57313	0.560351	2.13648	2.7174	-0.0812284	PLA2G6	4.86096	1.10478	2.2853	0.0159225	4.39662	0.959934	1.03819	-1.12239	PLA2G6	150.071	67.5439	129.151	30.853
PCNT	-1.55892	0.1628	1.55892	0.1628	PCNT	PCNT	5116	pericentrin	PCNT	-0.0347475	0.553834	-0.411599	-0.350405	PCNT	2.7081	2.76464	0.259543	1.73716	1.73755	-0.381002	PCNT	2.20838	-0.0347475	3.32089	0.553834	1.70071	-0.411599	1.7744	-0.350405	PCNT	234.11	352.047	180.292	188.103
PMS2CL	-1.55863	0.113294	1.55863	0.113294	PMS2CL	PMS2CL	441194	PMS2 C-terminal like pseudogene	PMS2CL	0.174985	-0.127517	-0.435299	-0.797786	PMS2CL	4.71526	4.7412	0.0237341	3.02527	3.04917	-0.616542	PMS2CL	5.23645	0.174985	4.24595	-0.127517	3.43023	-0.435299	2.66811	-0.797786	PMS2CL	82.0386	66.5205	53.7407	41.8008
AK1	-1.5584	0.379337	1.5584	0.379337	AK1	AK1	203	adenylate kinase 1	AK1	-0.341349	0.802076	-0.402432	-0.416974	AK1	19.8981	21.481	0.230363	12.7683	12.7684	-0.409703	AK1	13.3878	-0.341349	29.5743	0.802076	12.8328	-0.402432	12.7041	-0.416974	AK1	282.133	623.246	270.437	267.724
BAZ2B	-1.55807	0.324691	1.55807	0.324691	BAZ2B	BAZ2B	29994	bromodomain adjacent to zinc finger domain, 2B	BAZ2B	0.00580845	0.467435	0.0336946	-0.839979	BAZ2B	5.96567	6.04218	0.236622	3.82887	4.00574	-0.403142	BAZ2B	5.08367	0.00580845	7.00069	0.467435	5.18289	0.0336946	2.82859	-0.839979	BAZ2B	413.194	569.007	421.258	229.904
DUSP5P	-1.55664	0.650141	1.55664	0.650141	DUSP5P	DUSP5P	574029	dual specificity phosphatase 5 pseudogene	DUSP5P	0.888764	-0.0785525	0.874503	-1.34116	DUSP5P	0.432074	0.456583	0.405106	0.277568	0.363505	-0.233331	DUSP5P	0.604163	0.888764	0.309003	-0.0785525	0.59822	0.874503	0.128789	-1.34116	DUSP5P	14.0066	7.16375	13.8688	2.98577
ERCC3	-1.55653	0.374928	1.55653	0.374928	ERCC3	ERCC3	2071	excision repair cross-complementing rodent repair deficiency, complementation group 3	ERCC3	-0.512204	0.604967	-0.516523	-0.667384	ERCC3	58.1926	62.6092	0.0463812	37.3861	37.4372	-0.591953	ERCC3	39.5109	-0.512204	85.7075	0.604967	39.3928	-0.516523	35.4816	-0.667384	ERCC3	1028.48	2231	1025.41	923.598
PLEKHA5	-1.55612	0.0959565	1.55612	0.0959565	PLEKHA5	PLEKHA5	54477	pleckstrin homology domain containing, family A member 5	PLEKHA5	0.621782	0.31144	-0.0250118	-0.317671	PLEKHA5	13.6627	13.7418	0.466611	8.78001	8.82522	-0.171341	PLEKHA5	15.2142	0.621782	12.2695	0.31144	9.71728	-0.0250118	7.93315	-0.317671	PLEKHA5	628.295	494.299	404.789	322.463
LPIN3	-1.55493	0.413233	1.55493	0.413233	LPIN3	LPIN3	64900	lipin 3	LPIN3	0.570713	0.257119	0.378417	-0.824289	LPIN3	13.133	13.2106	0.413916	8.44603	9.19044	-0.222936	LPIN3	14.6408	0.570713	11.7805	0.257119	12.8138	0.378417	5.56708	-0.824289	LPIN3	622.945	501.243	545.208	236.871
SLC44A3	-1.55476	0.43534	1.55476	0.43534	SLC44A3	SLC44A3	126969	solute carrier family 44, member 3	SLC44A3	0.788732	0.271988	0.498861	-0.711528	SLC44A3	5.30854	5.39389	0.53036	3.41437	3.71922	-0.106333	SLC44A3	6.34969	0.788732	4.4381	0.271988	5.19389	0.498861	2.24455	-0.711528	SLC44A3	139.065	99.2691	116.149	49.7628
FAM179B	-1.55439	0.337867	1.55439	0.337867	FAM179B	FAM179B	23116	family with sequence similarity 179, member B	FAM179B	-0.672909	0.334685	-0.87984	-0.731074	FAM179B	1.33158	1.4136	-0.169112	0.85666	0.857798	-0.805457	FAM179B	0.939094	-0.672909	1.8881	0.334685	0.813611	-0.87984	0.901986	-0.731074	FAM179B	58.0273	116.667	50.2736	55.7344
NBEAL1	-1.55314	0.0229798	1.55314	0.0229798	NBEAL1	NBEAL1	65065	neurobeachin-like 1	NBEAL1	0.18387	0.166967	-0.362147	-0.557388	NBEAL1	1.62427	1.6243	0.175419	1.0458	1.04819	-0.459767	NBEAL1	1.63381	0.18387	1.61478	0.166967	1.11901	-0.362147	0.977374	-0.557388	NBEAL1	148.07	146.345	101.414	88.5778
POMT2	-1.55292	0.150585	1.55292	0.150585	POMT2	POMT2	29954	protein-O-mannosyltransferase 2	POMT2	-0.24763	0.307473	-0.633036	-0.577097	POMT2	6.97956	7.10912	0.0299211	4.49447	4.49531	-0.605066	POMT2	5.75807	-0.24763	8.46018	0.307473	4.40817	-0.633036	4.58245	-0.577097	POMT2	275.129	404.24	210.629	218.956
ZNF81	-1.55043	0.389028	1.55043	0.389028	ZNF81	ZNF81	347344	zinc finger protein 81	ZNF81	-0.25406	0.419542	-1.0217	-0.078151	ZNF81	0.951492	0.977538	0.0827411	0.613695	0.646802	-0.549928	ZNF81	0.753387	-0.25406	1.20169	0.419542	0.442521	-1.0217	0.851083	-0.078151	ZNF81	59.0278	94.1522	34.6714	66.6822
VWDE	-1.54991	0.377152	1.54991	0.377152	VWDE	VWDE	221806	von Willebrand factor D and EGF domains	VWDE	0.309923	0.278476	0.223287	-0.89925	VWDE	0.413526	0.413551	0.2942	0.266807	0.287254	-0.337981	VWDE	0.418058	0.309923	0.409044	0.278476	0.393692	0.223287	0.180817	-0.89925	VWDE	23.0108	22.5146	21.6697	9.95257
ARL17A	-1.54937	0.0674969	1.54937	0.0674969	ARL17A	ARL17A	51326	ADP-ribosylation factor-like 17A	ARL17A	0.467755	0.314031	-0.0858054	-0.395771	ARL17A	1.30324	1.30509	0.390893	0.841139	0.845997	-0.240788	ARL17A	1.37455	0.467755	1.23562	0.314031	0.936531	-0.0858054	0.755463	-0.395771	ARL17A	71.2662	64.0631	48.5564	39.1685
SLC5A10	-1.5488	0.711989	1.5488	0.711989	SLC5A10	SLC5A10	125206	solute carrier family 5 (sodium/glucose cotransporter), member 10	SLC5A10	-1.16218	1.50599	0.190507	-1.10899	SLC5A10	0.419922	0.612624	0.171906	0.271127	0.299092	-0.459244	SLC5A10	0.166559	-1.16218	1.05869	1.50599	0.425371	0.190507	0.172814	-1.10899	SLC5A10	3.21195	20.4138	8.2023	3.33255
THBS3	-1.54799	0.618584	1.54799	0.618584	THBS3	THBS3	7059	thrombospondin 3	THBS3	0.820319	-0.0649707	0.732775	-1.23822	THBS3	7.01918	7.35216	0.377674	4.53438	5.63408	-0.252721	THBS3	9.53972	0.820319	5.1646	-0.0649707	8.97805	0.732775	2.2901	-1.23822	THBS3	287.135	159.649	277.372	70.6632
ZNF43	-1.54782	0.226195	1.54782	0.226195	ZNF43	ZNF43	7594	zinc finger protein 43	ZNF43	-0.366225	0.349514	-0.567837	-0.709344	ZNF43	3.25213	3.3527	-0.00835577	2.10111	2.10364	-0.638591	ZNF43	2.53769	-0.366225	4.16771	0.349514	2.20672	-0.567837	2.00055	-0.709344	ZNF43	142.067	228.217	118.75	108.483
OFD1	-1.54734	0.277381	1.54734	0.277381	OFD1	OFD1	8481	oral-facial-digital syndrome 1	OFD1	0.181431	0.205133	-0.0106768	-0.862332	OFD1	13.8475	13.848	0.193282	8.94924	9.34191	-0.436504	OFD1	13.7342	0.181431	13.9617	0.205133	12.0219	-0.0106768	6.66192	-0.862332	OFD1	484.228	492.252	423.858	234.881
GIGYF1	-1.54558	0.503146	1.54558	0.503146	GIGYF1	GIGYF1	64599	GRB10 interacting GYF protein 1	GIGYF1	0.54165	0.0826753	0.425106	-1.05708	GIGYF1	3.15841	3.19845	0.312163	2.04351	2.31911	-0.315989	GIGYF1	3.70298	0.54165	2.69393	0.0826753	3.41561	0.425106	1.2226	-1.05708	GIGYF1	232.109	168.86	214.096	76.6348
LOC100292680	-1.54548	0.437219	1.54548	0.437219	LOC100292680	LOC100292680	100292680	uncharacterized LOC100292680	LOC100292680	-0.267819	0.987259	-0.446314	-0.0903522	LOC100292680	29.803	32.6672	0.35972	19.284	19.4309	-0.268333	LOC100292680	19.2909	-0.267819	46.0435	0.987259	17.0459	-0.446314	21.816	-0.0903522	LOC100292680	402.189	959.943	355.382	454.832
FAM154B	-1.54527	0.675915	1.54527	0.675915	FAM154B	FAM154B	283726	family with sequence similarity 154, member B	FAM154B	0.252123	0.284804	-1.65525	0.936462	FAM154B	0.439621	0.43965	0.268464	0.284495	0.407186	-0.359396	FAM154B	0.43467	0.252123	0.444629	0.284804	0.115873	-1.65525	0.6985	0.936462	FAM154B	13.0061	13.3041	3.46714	20.9004
CYP20A1	-1.54489	0.0165203	1.54489	0.0165203	CYP20A1	CYP20A1	57404	cytochrome P450, family 20, subfamily A, polypeptide 1	CYP20A1	0.383843	0.317964	-0.351332	-0.201868	CYP20A1	1.88582	1.88631	0.350904	1.22068	1.22232	-0.2766	CYP20A1	1.92937	0.383843	1.84325	0.317964	1.15906	-0.351332	1.28558	-0.201868	CYP20A1	212.1	202.632	127.418	141.326
HELB	-1.54449	0.108619	1.54449	0.108619	HELB	HELB	92797	helicase (DNA) B	HELB	0.11535	0.39801	-0.546143	-0.194749	HELB	3.78508	3.80326	0.25668	2.45071	2.4689	-0.370446	HELB	3.43187	0.11535	4.17465	0.39801	2.16971	-0.546143	2.7681	-0.194749	HELB	111.052	135.088	70.2097	89.5731
ZDHHC11	-1.54418	0.0979724	1.54418	0.0979724	ZDHHC11	ZDHHC11	79844	zinc finger, DHHC-type containing 11	ZDHHC11	-0.166717	0.252989	-0.614656	-0.552764	ZDHHC11	0.612585	0.619077	0.0431359	0.396705	0.396796	-0.58371	ZDHHC11	0.529657	-0.166717	0.708498	0.252989	0.388286	-0.614656	0.405306	-0.552764	ZDHHC11	13.0061	17.3977	9.53465	9.95257
LOC100505826	-1.54349	0.461859	1.54349	0.461859	LOC100505826				LOC100505826	0.306701	0.400778	-0.964359	0.419455	LOC100505826	1.21679	1.21744	0.35374	0.788341	0.880756	-0.272452	LOC100505826	1.17776	0.306701	1.25712	0.400778	0.488011	-0.964359	1.2735	0.419455	LOC100505826	23.0108	24.5614	9.53465	24.8814
CROCCP3	-1.54336	0.576877	1.54336	0.576877	CROCCP3	CROCCP3	114819	ciliary rootlet coiled-coil, rootletin pseudogene 3	CROCCP3	0.663675	-0.303642	0.369281	-1.2614	CROCCP3	0.460385	0.4865	0.180017	0.2983	0.34722	-0.446061	CROCCP3	0.64375	0.663675	0.32925	-0.303642	0.524923	0.369281	0.169516	-1.2614	CROCCP3	34.016	17.3977	27.7372	8.95731
MYO7A	-1.5416	0.354219	1.5416	0.354219	MYO7A	MYO7A	4647	myosin VIIA	MYO7A	0.140413	0.616734	-0.710403	0.218695	MYO7A	0.403978	0.409495	0.378574	0.262051	0.275755	-0.245854	MYO7A	0.342503	0.140413	0.476487	0.616734	0.189908	-0.710403	0.361601	0.218695	MYO7A	25.0118	34.7954	13.8686	26.8719
DZIP1	-1.54091	0.0373212	1.54091	0.0373212	DZIP1	DZIP1	22873	DAZ interacting protein 1	DZIP1	0.182344	0.0894893	-0.372883	-0.602856	DZIP1	0.314325	0.314488	0.135916	0.203986	0.204634	-0.48787	DZIP1	0.324605	0.182344	0.304371	0.0894893	0.22091	-0.372883	0.188359	-0.602856	DZIP1	24.0113	22.5146	16.4689	13.9336
FAM91A2	-1.5407	0.616547	1.5407	0.616547	FAM91A2	FAM91A2	57234	family with sequence similarity 91, member A2	FAM91A2	1.24929	-0.718069	0.0423479	-0.758286	FAM91A2	0.26248	0.325894	0.265613	0.170365	0.176965	-0.357969	FAM91A2	0.519056	1.24929	0.132733	-0.718069	0.224847	0.0423479	0.129084	-0.758286	FAM91A2	4.00188	1.02339	1.73357	0.995257
TBX20	-1.54069	0.303272	1.54069	0.303272	TBX20	TBX20	57057	T-box 20	TBX20	0.35589	0.0406437	-0.85105	0.000423876	TBX20	1.05174	1.05802	0.198267	0.68264	0.71258	-0.425313	TBX20	1.17316	0.35589	0.942885	0.0406437	0.508197	-0.85105	0.916962	0.000423876	TBX20	14.0066	11.2573	6.0675	10.9478
GALR3	-1.54069	0.765724	1.54069	0.765724	GALR3	GALR3	8484	galanin receptor 3	GALR3	1.23972	-0.897517	1.03279	-1.93774	GALR3	0.441802	0.568643	0.171103	0.286756	0.452626	-0.452475	GALR3	0.926647	1.23972	0.21064	-0.897517	0.802827	1.03279	0.102424	-1.93774	GALR3	9.00423	2.04679	7.80107	0.995257
MEI1	-1.54069	0.594048	1.54069	0.594048	MEI1	MEI1	150365	meiosis inhibitor 1	MEI1	0.808627	0.163236	-1.07638	0.801089	MEI1	0.329091	0.337358	0.485931	0.2136	0.260436	-0.137646	MEI1	0.411583	0.808627	0.263133	0.163236	0.111433	-1.07638	0.409438	0.801089	MEI1	16.0075	10.2339	4.33393	15.9241
ACRBP	-1.54069	0.169233	1.54069	0.169233	ACRBP	ACRBP	84519	acrosin binding protein	ACRBP	-0.203907	0.243815	-0.410839	-0.796405	ACRBP	0.204	0.20646	0.0199541	0.132408	0.133592	-0.603622	ACRBP	0.174679	-0.203907	0.238242	0.243815	0.151338	-0.410839	0.115846	-0.796405	ACRBP	3.00141	4.09357	2.60036	1.99051
LOC286437	-1.54069	0.46939	1.54069	0.46939	LOC286437	LOC286437	286437	uncharacterized LOC286437	LOC286437	0.223101	0.758284	0.518672	-0.784438	LOC286437	0.668892	0.680431	0.490692	0.434151	0.479185	-0.132883	LOC286437	0.555652	0.223101	0.80521	0.758284	0.681991	0.518672	0.276378	-0.784438	LOC286437	12.0056	17.3977	14.7354	5.97154
EP400NL	-1.54069	0.270217	1.54069	0.270217	EP400NL	EP400NL	347918	EP400 N-terminal like	EP400NL	0.504684	-0.0475966	-0.702246	-0.0878174	EP400NL	0.36372	0.370403	0.228544	0.236076	0.241449	-0.395032	EP400NL	0.440447	0.504684	0.300359	-0.0475966	0.190797	-0.702246	0.292101	-0.0878174	EP400NL	6.00282	4.09357	2.60036	3.98103
PAX9	-1.54069	0.513772	1.54069	0.513772	PAX9	PAX9	5083	paired box 9	PAX9	0.888579	-0.548222	-0.787835	-0.118958	PAX9	0.737633	0.830991	0.170179	0.478769	0.49169	-0.453396	PAX9	1.21367	0.888579	0.448312	-0.548222	0.379708	-0.787835	0.603673	-0.118958	PAX9	36.0169	13.3041	11.2682	17.9146
PPP1R42	-1.54069	0.33397	1.54069	0.33397	PPP1R42	PPP1R42	286187	protein phosphatase 1, regulatory subunit 42	PPP1R42	0.614709	-0.352609	-0.592221	-0.392828	PPP1R42	0.638895	0.675135	0.13105	0.414681	0.415672	-0.492524	PPP1R42	0.893357	0.614709	0.456913	-0.352609	0.386993	-0.592221	0.444351	-0.392828	PPP1R42	8.00376	4.09357	3.46714	3.98103
PROCA1	-1.54069	0.185721	1.54069	0.185721	PROCA1	PROCA1	147011	protein interacting with cyclin A1	PROCA1	0.523989	0.364024	0.124414	-0.483548	PROCA1	0.711754	0.712848	0.444006	0.461972	0.472265	-0.179567	PROCA1	0.752328	0.523989	0.673369	0.364024	0.570326	0.124414	0.374204	-0.483548	PROCA1	8.00376	7.16375	6.0675	3.98103
IL23A	-1.54068	0.342202	1.54068	0.342202	IL23A	IL23A	51561	interleukin 23, alpha subunit p19	IL23A	0.703456	0.958529	-0.281079	0.695925	IL23A	1.53586	1.54187	0.830993	0.996873	1.05457	0.207423	IL23A	1.40592	0.703456	1.67782	0.958529	0.710536	-0.281079	1.3986	0.695925	IL23A	12.0056	14.3275	6.0675	11.9431
DSCAML1	-1.54039	0.395808	1.54039	0.395808	DSCAML1	DSCAML1	57453	Down syndrome cell adhesion molecule like 1	DSCAML1	-0.443556	0.292505	-1.14873	-0.248907	DSCAML1	2.12942	2.19909	-0.0755253	1.38239	1.45016	-0.698821	DSCAML1	1.64996	-0.443556	2.74821	0.292505	1.01203	-1.14873	1.88829	-0.248907	DSCAML1	113.053	188.304	69.3429	129.383
MERTK	-1.53993	0.463446	1.53993	0.463446	MERTK	MERTK	10461	c-mer proto-oncogene tyrosine kinase	MERTK	0.0997363	1.02259	0.454929	-0.578342	MERTK	7.51724	7.90501	0.561162	4.88153	5.19789	-0.061707	MERTK	5.45953	0.0997363	10.3505	1.02259	6.98359	0.454929	3.41219	-0.578342	MERTK	191.09	362.281	244.434	119.431
C10orf116	-1.53845	0.617045	1.53845	0.617045	C10orf116	C10orf116	10974	chromosome 10 open reading frame 116	C10orf116	1.65629	-0.306844	0.453542	-0.347063	C10orf116	0.425406	0.527724	0.674722	0.276515	0.287228	0.0532393	C10orf116	0.840009	1.65629	0.215438	-0.306844	0.36494	0.453542	0.209515	-0.347063	C10orf116	3.99029	1.02339	1.73357	0.995257
ANKS1B	-1.53824	0.263392	1.53824	0.263392	ANKS1B	ANKS1B	56899	ankyrin repeat and sterile alpha motif domain containing 1B	ANKS1B	0.547113	0.285547	0.176614	-0.586515	ANKS1B	1.14848	1.1532	0.41633	0.746621	0.772887	-0.204951	ANKS1B	1.25746	0.547113	1.04895	0.285547	0.972664	0.176614	0.57311	-0.586515	ANKS1B	52.8536	48.417	44.9545	27.7303
NRCAM	-1.5371	0.0574145	1.5371	0.0574145	NRCAM	NRCAM	4897	neuronal cell adhesion molecule	NRCAM	-0.668591	-0.767486	-1.48556	-1.19095	NRCAM	1.74483	1.74586	-0.718038	1.13514	1.14106	-1.33825	NRCAM	1.80567	-0.668591	1.68604	-0.767486	1.02496	-1.48556	1.25717	-1.19095	NRCAM	113.053	105.409	64.1422	78.6253
TIGD1	-1.53658	0.255083	1.53658	0.255083	TIGD1	TIGD1	200765	tigger transposable element derived 1	TIGD1	0.0162774	0.422688	-0.0644764	-0.736005	TIGD1	9.33982	9.43262	0.219483	6.07831	6.24367	-0.400241	TIGD1	8.11274	0.0162774	10.7525	0.422688	7.67111	-0.0644764	4.81624	-0.736005	TIGD1	186.087	246.638	175.958	110.473
CEP135	-1.53635	0.208536	1.53635	0.208536	CEP135	CEP135	9662	centrosomal protein 135kDa	CEP135	-0.28506	0.369732	-0.491992	-0.662358	CEP135	2.58101	2.64776	0.042336	1.67996	1.68289	-0.577175	CEP135	2.057	-0.28506	3.23852	0.369732	1.78214	-0.491992	1.58364	-0.662358	CEP135	115.054	181.141	99.6804	88.5778
OBSCN	-1.53628	0.252515	1.53628	0.252515	OBSCN	OBSCN	84033	obscurin, cytoskeletal calmodulin and titin-interacting RhoGEF	OBSCN	0.633796	0.297863	0.197538	-0.50476	OBSCN	0.584104	0.588068	0.465829	0.380207	0.391525	-0.153611	OBSCN	0.656226	0.633796	0.519909	0.297863	0.484983	0.197538	0.298067	-0.50476	OBSCN	144.068	111.55	106.615	64.6917
LRP4	-1.53602	0.400881	1.53602	0.400881	LRP4	LRP4	4038	low density lipoprotein receptor-related protein 4	LRP4	-0.260521	-0.45732	-1.55492	-0.401325	LRP4	0.38692	0.38782	-0.35892	0.251897	0.272299	-0.97812	LRP4	0.414231	-0.260521	0.36141	-0.45732	0.168885	-1.55492	0.375713	-0.401325	LRP4	34.016	29.6784	13.8686	30.853
LRSAM1	-1.53479	0.140068	1.53479	0.140068	LRSAM1	LRSAM1	90678	leucine rich repeat and sterile alpha motif containing 1	LRSAM1	0.104593	0.366279	-0.158629	-0.606573	LRSAM1	11.6486	11.6965	0.235436	7.5897	7.68135	-0.382601	LRSAM1	10.6386	0.104593	12.7544	0.366279	8.86435	-0.158629	6.49834	-0.606573	LRSAM1	312.147	375.585	259.169	197.061
BMI1	-1.53375	0.518259	1.53375	0.518259	BMI1	BMI1	648	BMI1 polycomb ring finger oncogene	BMI1	0.487907	0.614049	-0.857289	0.725113	BMI1	6.32496	6.33101	0.550978	4.12385	4.7597	-0.0660879	BMI1	6.05441	0.487907	6.60761	0.614049	2.38302	-0.857289	7.13638	0.725113	BMI1	199.759	218.011	78.6255	235.458
PTK2B	-1.53246	0.224573	1.53246	0.224573	PTK2B	PTK2B	2185	PTK2B protein tyrosine kinase 2 beta	PTK2B	-0.448352	-0.0466981	-1.15563	-0.571114	PTK2B	2.93439	2.96286	-0.247525	1.91483	1.95425	-0.863372	PTK2B	2.55307	-0.448352	3.37266	-0.0466981	1.56369	-1.15563	2.34481	-0.571114	PTK2B	109.051	145.322	65.009	97.5351
EPB41L4A	-1.53212	0.58404	1.53212	0.58404	EPB41L4A	EPB41L4A	64097	erythrocyte membrane protein band 4.1 like 4A	EPB41L4A	-1.22881	0.333344	-0.519803	-1.60671	EPB41L4A	1.97777	2.27478	-0.447733	1.29088	1.38355	-1.06326	EPB41L4A	1.15093	-1.22881	3.39863	0.333344	1.8814	-0.519803	0.885703	-1.60671	EPB41L4A	53.0249	156.579	86.6786	40.8055
MTMR8	-1.53149	0.377716	1.53149	0.377716	MTMR8	MTMR8	55613	myotubularin related protein 8	MTMR8	0.420583	0.363631	-0.769063	0.323411	MTMR8	3.24122	3.24185	0.392107	2.11639	2.26991	-0.222826	MTMR8	3.30583	0.420583	3.17787	0.363631	1.44931	-0.769063	3.0905	0.323411	MTMR8	83.039	79.8247	36.405	77.63
SRGAP3	-1.53086	0.388335	1.53086	0.388335	SRGAP3	SRGAP3	9901	SLIT-ROBO Rho GTPase activating protein 3	SRGAP3	0.119346	0.554989	0.240736	-0.795084	SRGAP3	1.17633	1.18976	0.337168	0.76841	0.818457	-0.277174	SRGAP3	1.01148	0.119346	1.36804	0.554989	1.10027	0.240736	0.536644	-0.795084	SRGAP3	90.0423	121.784	97.9468	47.7723
KLHL28	-1.53015	0.298421	1.53015	0.298421	KLHL28	KLHL28	54813	kelch-like 28 (Drosophila)	KLHL28	-0.00982624	0.122719	-0.121493	-0.992954	KLHL28	4.72507	4.73006	0.0564461	3.08799	3.22991	-0.557223	KLHL28	4.51293	-0.00982624	4.94719	0.122719	4.1768	-0.121493	2.28301	-0.992954	KLHL28	293.138	321.345	271.304	148.293
ARL8A	-1.52896	0.0860609	1.52896	0.0860609	ARL8A	ARL8A	127829	ADP-ribosylation factor-like 8A	ARL8A	0.137416	0.41803	-0.20326	-0.466393	ARL8A	13.0278	13.0895	0.277723	8.52073	8.55618	-0.334826	ARL8A	11.8205	0.137416	14.3585	0.41803	9.33431	-0.20326	7.77806	-0.466393	ARL8A	192.09	233.334	151.688	126.398
FLJ35776	-1.52894	0.560826	1.52894	0.560826	FLJ35776				FLJ35776	-0.0115266	0.851225	0.58124	-0.966598	FLJ35776	4.53214	4.73625	0.419849	2.96425	3.40108	-0.192679	FLJ35776	3.36083	-0.0115266	6.11168	0.851225	5.06859	0.58124	1.73357	-0.966598	FLJ35776	27.0128	49.1229	40.739	13.9336
STARD9	-1.52878	0.0703716	1.52878	0.0703716	STARD9	STARD9	57519	StAR-related lipid transfer (START) domain containing 9	STARD9	0.418064	0.268542	-0.423581	-0.114566	STARD9	0.355945	0.356424	0.343303	0.23283	0.234167	-0.269073	STARD9	0.374877	0.418064	0.33797	0.268542	0.209184	-0.423581	0.25915	-0.114566	STARD9	59.0278	53.2164	32.9379	40.8055
C8orf73	-1.5286	0.303855	1.5286	0.303855	C8orf73	C8orf73	642475	chromosome 8 open reading frame 73	C8orf73	-0.243661	0.151591	-0.257945	-1.05855	C8orf73	0.257826	0.260248	-0.0460349	0.168667	0.175202	-0.65825	C8orf73	0.22482	-0.243661	0.295677	0.151591	0.222605	-0.257945	0.127799	-1.05855	C8orf73	7.00329	9.21054	6.93429	3.98103
KCNJ16	-1.527	0.637755	1.527	0.637755	KCNJ16	KCNJ16	3773	potassium inwardly-rectifying channel, subfamily J, member 16	KCNJ16	0.674927	-0.458488	0.453268	-1.45823	KCNJ16	9.06917	9.7779	0.108219	5.93921	7.29085	-0.50248	KCNJ16	13.4327	0.674927	6.1231	-0.458488	11.5196	0.453268	3.0621	-1.45823	KCNJ16	516.243	233.334	442.928	117.44
DOPEY2	-1.5258	0.469175	1.5258	0.469175	DOPEY2	DOPEY2	9980	dopey family member 2	DOPEY2	0.00747884	0.537655	0.298046	-0.972047	DOPEY2	1.6029	1.63003	0.272567	1.05053	1.15396	-0.337001	DOPEY2	1.33385	0.00747884	1.92622	0.537655	1.63146	0.298046	0.676457	-0.972047	DOPEY2	102.048	147.369	124.817	51.7533
ZBTB40	-1.52449	0.0687544	1.52449	0.0687544	ZBTB40	ZBTB40	9923	zinc finger and BTB domain containing 40	ZBTB40	0.549285	0.215412	-0.204466	-0.247497	ZBTB40	4.15978	4.18766	0.382348	2.72863	2.72893	-0.225982	ZBTB40	4.67007	0.549285	3.70525	0.215412	2.76963	-0.204466	2.68824	-0.247497	ZBTB40	407.191	322.369	240.967	233.885
ZNF808	-1.52382	0.014827	1.52382	0.014827	ZNF808	ZNF808	388558	zinc finger protein 808	ZNF808	0.24789	0.110647	-0.398577	-0.458269	ZNF808	2.9723	2.97566	0.179269	1.95056	1.95097	-0.428423	ZNF808	3.11709	0.24789	2.83423	0.110647	1.99133	-0.398577	1.91062	-0.458269	ZNF808	99.0466	90.0586	63.2754	60.7107
CIZ1	-1.5228	0.309334	1.5228	0.309334	CIZ1	CIZ1	25792	CDKN1A interacting zinc finger protein 1	CIZ1	-0.312747	0.490467	-0.316611	-0.719116	CIZ1	31.9047	33.1489	0.08886	20.9514	21.1556	-0.517863	CIZ1	24.1523	-0.312747	42.1454	0.490467	24.0877	-0.316611	18.2234	-0.719116	CIZ1	684.322	1188.16	684.759	519.524
KLHDC1	-1.52244	0.472853	1.52244	0.472853	KLHDC1	KLHDC1	122773	kelch domain containing 1	KLHDC1	0.483598	0.0865967	0.340798	-0.98337	KLHDC1	2.26314	2.2846	0.285098	1.48653	1.64583	-0.321286	KLHDC1	2.59697	0.483598	1.97223	0.0865967	2.35223	0.340798	0.939432	-0.98337	KLHDC1	66.031	50.1463	59.8082	23.8862
ZNF460	-1.52231	0.090443	1.52231	0.090443	ZNF460	ZNF460	10794	zinc finger protein 460	ZNF460	0.300766	-0.0864527	-0.469434	-0.528768	ZNF460	2.32287	2.34382	0.107157	1.52589	1.52621	-0.499101	ZNF460	2.65648	0.300766	2.03115	-0.0864527	1.55759	-0.469434	1.49483	-0.528768	ZNF460	99.0466	75.7311	58.0747	55.7344
LOC158257	-1.52133	0.626744	1.52133	0.626744	LOC158257				LOC158257	0.191694	0.339855	0.72174	-1.40085	LOC158257	1.14072	1.14222	0.265775	0.749816	0.962017	-0.339556	LOC158257	1.08362	0.191694	1.20082	0.339855	1.56472	0.72174	0.359313	-1.40085	LOC158257	12.0056	13.3041	17.3357	3.98103
B3GNT8	-1.52131	0.490326	1.52131	0.490326	B3GNT8	B3GNT8	374907	UDP-GlcNAc:betaGal beta-1,3-N-acetylglucosaminyltransferase 8	B3GNT8	-0.584803	0.563354	-1.05477	-0.177306	B3GNT8	0.523846	0.565869	-0.0107246	0.344339	0.360384	-0.616039	B3GNT8	0.351875	-0.584803	0.779863	0.563354	0.254047	-1.05477	0.466721	-0.177306	B3GNT8	6.00282	13.3041	4.33393	7.96205
HERC2P2	-1.52096	0.453553	1.52096	0.453553	HERC2P2	HERC2P2	400322	hect domain and RLD 2 pseudogene 2	HERC2P2	0.334326	0.0825284	0.246877	-1.03999	HERC2P2	9.72097	9.75801	0.208427	6.39133	7.03759	-0.396557	HERC2P2	10.6074	0.334326	8.90862	0.0825284	9.98353	0.246877	4.09165	-1.03999	HERC2P2	637.3	535.235	599.816	245.828
EPC2	-1.52067	0.324574	1.52067	0.324574	EPC2	EPC2	26122	enhancer of polycomb homolog 2 (Drosophila)	EPC2	0.248051	0.213618	0.0926534	-0.840403	EPC2	3.09335	3.09357	0.230835	2.0342	2.14149	-0.373875	EPC2	3.13049	0.248051	3.05666	0.213618	2.81082	0.0926534	1.47216	-0.840403	EPC2	110.052	107.456	98.8136	51.7533
SPAG4	-1.52024	0.508586	1.52024	0.508586	SPAG4	SPAG4	6676	sperm associated antigen 4	SPAG4	0.336597	0.274124	0.457722	-1.05561	SPAG4	3.61241	3.61326	0.305361	2.37621	2.71059	-0.298942	SPAG4	3.69148	0.336597	3.53504	0.274124	4.01479	0.457722	1.40639	-1.05561	SPAG4	47.0221	45.0293	51.1404	17.9146
MGC16121	-1.51914	0.613779	1.51914	0.613779	MGC16121	MGC16121	84848	uncharacterized protein MGC16121	MGC16121	0.317594	0.835705	0.958665	-1.01187	MGC16121	1.01159	1.02794	0.57665	0.665895	0.827312	-0.0266027	MGC16121	0.845317	0.317594	1.21056	0.835705	1.31826	0.958665	0.336365	-1.01187	MGC16121	5.00235	7.16375	7.80107	1.99051
R3HDM1	-1.5182	0.456682	1.5182	0.456682	R3HDM1	R3HDM1	23518	R3H domain containing 1	R3HDM1	-0.514921	0.794463	-0.529934	-0.395244	R3HDM1	17.2897	19.1007	0.139771	11.3883	11.4007	-0.462589	R3HDM1	10.9826	-0.514921	27.2188	0.794463	10.8689	-0.529934	11.9325	-0.395244	R3HDM1	499.235	1237.28	494.068	542.415
ZNF507	-1.51722	0.0680316	1.51722	0.0680316	ZNF507	ZNF507	22847	zinc finger protein 507	ZNF507	0.291407	0.255	-0.492652	-0.163795	ZNF507	5.92202	5.92249	0.273203	3.90322	3.9286	-0.328223	ZNF507	5.99722	0.291407	5.84777	0.255	3.48277	-0.492652	4.37442	-0.163795	ZNF507	461.217	446.199	267.837	336.397
MFSD9	-1.51574	0.341523	1.51574	0.341523	MFSD9	MFSD9	84804	major facilitator superfamily domain containing 9	MFSD9	-0.272622	0.685484	-0.468833	-0.318346	MFSD9	14.6101	15.423	0.206431	9.63894	9.65206	-0.39359	MFSD9	10.482	-0.272622	20.364	0.685484	9.14911	-0.468833	10.155	-0.318346	MFSD9	268.126	520.907	234.032	259.762
NPM3	-1.51521	0.332016	1.51521	0.332016	NPM3	NPM3	10360	nucleophosmin/nucleoplasmin 3	NPM3	0.0217999	0.34922	0.0289858	-0.85701	NPM3	12.2711	12.3501	0.18551	8.09856	8.48337	-0.414012	NPM3	10.9547	0.0217999	13.7456	0.34922	11.0094	0.0289858	5.95734	-0.85701	NPM3	75.0353	94.1522	75.4104	40.8055
GLI4	-1.51504	0.438172	1.51504	0.438172	GLI4	GLI4	2738	GLI family zinc finger 4	GLI4	0.143245	0.462231	0.306685	-0.899912	GLI4	3.9421	3.96622	0.302738	2.60199	2.83283	-0.296613	GLI4	3.52952	0.143245	4.40291	0.462231	3.9529	0.306685	1.71275	-0.899912	GLI4	41.0193	51.1697	45.9397	19.9051
LOC100131347	-1.51502	0.359396	1.51502	0.359396	LOC100131347	LOC100131347	100131347	RAD52 motif 1 pseudogene	LOC100131347	0.762788	-0.233442	-0.434365	-0.234973	LOC100131347	0.327654	0.347378	0.264673	0.216269	0.216786	-0.334669	LOC100131347	0.462767	0.762788	0.231989	-0.233442	0.201829	-0.434365	0.231743	-0.234973	LOC100131347	9.93713	4.98156	4.33393	4.97628
SH3TC1	-1.51483	0.15139	1.51483	0.15139	SH3TC1	SH3TC1	54436	SH3 domain and tetratricopeptide repeats 1	SH3TC1	-0.32709	0.172465	-0.762294	-0.590642	SH3TC1	3.52629	3.57927	-0.0773123	2.32784	2.33196	-0.676468	SH3TC1	2.9657	-0.32709	4.19284	0.172465	2.1934	-0.762294	2.47053	-0.590642	SH3TC1	123.058	173.977	91.0125	102.511
PMF1-BGLAP	-1.51426	0.483321	1.51426	0.483321	PMF1-BGLAP	PMF1-BGLAP	100527963	PMF1-BGLAP readthrough	PMF1-BGLAP	1.1377	0.739617	1.01263	-0.332536	PMF1-BGLAP	6.3044	6.3645	0.938658	4.16335	4.62404	0.340045	PMF1-BGLAP	7.23704	1.1377	5.49195	0.739617	6.63606	1.01263	2.61202	-0.332536	PMF1-BGLAP	58.7609	44.5917	48.9102	21.2082
ETV1	-1.51425	0.133673	1.51425	0.133673	ETV1	ETV1	2115	ets variant 1	ETV1	0.381706	0.711534	0.127902	-0.231862	ETV1	18.796	18.9189	0.54662	12.4128	12.5094	-0.0519798	ETV1	16.7657	0.381706	21.0722	0.711534	14.0611	0.127902	10.9577	-0.231862	ETV1	1076.51	1369.3	911.859	700.661
FAM82A1	-1.51416	0.336993	1.51416	0.336993	FAM82A1	FAM82A1	151393	family with sequence similarity 82, member A1	FAM82A1	0.489706	0.330507	0.282774	-0.659592	FAM82A1	3.58628	3.59174	0.410107	2.3685	2.49594	-0.188409	FAM82A1	3.78971	0.489706	3.39377	0.330507	3.28332	0.282774	1.70857	-0.659592	FAM82A1	64.0301	57.31	55.4743	28.8624
SZT2	-1.51354	0.328321	1.51354	0.328321	SZT2	SZT2	23334	seizure threshold 2 homolog (mouse)	SZT2	0.477981	-0.325837	-0.285344	-0.758374	SZT2	0.402708	0.418436	0.0760723	0.26607	0.269653	-0.521859	SZT2	0.53208	0.477981	0.304792	-0.325837	0.313468	-0.285344	0.225838	-0.758374	SZT2	75.0353	42.9825	44.2061	31.8482
MIDN	-1.51352	0.462789	1.51352	0.462789	MIDN	MIDN	90007	midnolin	MIDN	0.258191	-0.401003	-0.0931301	-1.2455	MIDN	4.09871	4.20613	-0.0714061	2.70806	2.92692	-0.669315	MIDN	5.15069	0.258191	3.26158	-0.401003	4.03745	-0.0931301	1.81639	-1.2455	MIDN	189.089	119.737	148.22	66.6822
CHML	-1.51339	0.158865	1.51339	0.158865	CHML	CHML	1122	choroideremia-like (Rab escort protein 2)	CHML	0.422167	0.729022	-0.246529	0.202142	CHML	6.13176	6.16647	0.575594	4.05166	4.10074	-0.0221934	CHML	5.51314	0.422167	6.8198	0.729022	3.46818	-0.246529	4.73331	0.202142	CHML	387.182	478.948	243.567	332.416
AKIRIN2-AS1	-1.51293	0.646437	1.51293	0.646437	AKIRIN2-AS1	AKIRIN2-AS1	55389	AKIRIN2 antisense RNA 1	AKIRIN2-AS1	0.982338	-0.569947	0.412835	-1.19512	AKIRIN2-AS1	2.17677	2.49944	0.206196	1.43878	1.66803	-0.391145	AKIRIN2-AS1	3.72781	0.982338	1.27107	-0.569947	2.51198	0.412835	0.824085	-1.19512	AKIRIN2-AS1	9.00423	3.07018	6.0675	1.99051
FBXL17	-1.51225	0.194043	1.51225	0.194043	FBXL17	FBXL17	64839	F-box and leucine-rich repeat protein 17	FBXL17	0.229384	-0.152973	-0.314581	-0.802401	FBXL17	4.1141	4.15027	0.0382054	2.72052	2.75949	-0.558491	FBXL17	4.69705	0.229384	3.6035	-0.152973	3.22163	-0.314581	2.29735	-0.802401	FBXL17	240.113	184.211	164.689	117.44
LOC146880	-1.51209	0.343476	1.51209	0.343476	LOC146880	LOC146880	146880	Rho GTPase activating protein 27 pseudogene	LOC146880	0.394766	0.22104	0.188157	-0.765434	LOC146880	2.07892	2.08269	0.307903	1.37486	1.45063	-0.288638	LOC146880	2.20793	0.394766	1.95744	0.22104	1.91333	0.188157	0.987939	-0.765434	LOC146880	60.0282	53.2164	52.0072	26.8719
KCNE2	-1.51152	0.450658	1.51152	0.450658	KCNE2	KCNE2	9992	potassium voltage-gated channel, Isk-related family, member 2	KCNE2	0.679755	0.0603564	0.335321	-0.787215	KCNE2	1.45754	1.49125	0.370056	0.964288	1.03819	-0.225947	KCNE2	1.80655	0.679755	1.17596	0.0603564	1.42287	0.335321	0.653504	-0.787215	KCNE2	11.0052	7.16375	8.66786	3.98103
FAM13B	-1.51145	0.390165	1.51145	0.390165	FAM13B	FAM13B	51306	family with sequence similarity 13, member B	FAM13B	0.61081	0.168364	0.294608	-0.707305	FAM13B	11.5122	11.6478	0.389587	7.61664	8.08046	-0.206348	FAM13B	13.42	0.61081	9.87559	0.168364	10.7787	0.294608	5.38221	-0.707305	FAM13B	727.342	532.164	581.613	287.629
L3MBTL3	-1.51121	0.382742	1.51121	0.382742	L3MBTL3	L3MBTL3	84456	l(3)mbt-like 3 (Drosophila)	L3MBTL3	0.499945	0.474382	0.428205	-0.645279	L3MBTL3	2.87197	2.87209	0.487163	1.90045	2.0335	-0.108537	L3MBTL3	2.89753	0.499945	2.84664	0.474382	2.75697	0.428205	1.31003	-0.645279	L3MBTL3	117.055	114.62	112.682	52.7486
TSGA10	-1.51088	0.0323776	1.51088	0.0323776	TSGA10	TSGA10	80705	testis specific, 10	TSGA10	0.0934522	0.110012	-0.384149	-0.603158	TSGA10	2.15448	2.15451	0.101732	1.42598	1.43009	-0.493653	TSGA10	2.14215	0.0934522	2.16688	0.110012	1.53843	-0.384149	1.32175	-0.603158	TSGA10	76.0357	76.7545	54.6075	46.7771
URB1	-1.5105	0.33153	1.51049	0.33153	URB1	URB1	9875	URB1 ribosome biogenesis 1 homolog (S. cerevisiae)	URB1	-0.0639137	0.357432	-0.866296	-0.0302288	URB1	2.20783	2.23141	0.146759	1.46166	1.52345	-0.448262	URB1	1.90786	-0.0639137	2.55496	0.357432	1.09397	-0.866296	1.95293	-0.0302288	URB1	207.097	277.34	118.75	211.99
HIST1H2AG	-1.50956	0.136212	1.50956	0.136212	HIST1H2AG	HIST1H2AG	8969	histone cluster 1, H2ag	HIST1H2AG	0.198602	0.646319	-0.271367	-0.0719704	HIST1H2AG	2.36167	2.39015	0.42246	1.56447	1.56821	-0.171669	HIST1H2AG	2.02223	0.198602	2.75808	0.646319	1.46001	-0.271367	1.67641	-0.0719704	HIST1H2AG	6.00282	8.18714	4.33393	4.97628
MLH3	-1.50806	0.0837224	1.50806	0.0837224	MLH3	MLH3	27030	mutL homolog 3 (E. coli)	MLH3	-0.0561449	0.188198	-0.663192	-0.390146	MLH3	3.79865	3.81228	0.0660267	2.51889	2.53018	-0.526669	MLH3	3.49021	-0.0561449	4.13434	0.188198	2.29146	-0.663192	2.7689	-0.390146	MLH3	273.128	324.416	180.292	216.966
ZNF780B	-1.50741	0.422303	1.50741	0.422303	ZNF780B	ZNF780B	163131	zinc finger protein 780B	ZNF780B	0.22672	0.130119	0.175912	-1.00321	ZNF780B	1.17319	1.17385	0.17842	0.778282	0.844177	-0.413648	ZNF780B	1.21313	0.22672	1.13456	0.130119	1.17115	0.175912	0.517204	-1.00321	ZNF780B	105.049	98.2457	101.414	44.7865
FLJ45340	-1.50703	0.517143	1.50703	0.517143	FLJ45340	FLJ45340	402483	uncharacterized LOC402483	FLJ45340	0.164469	-0.118879	0.176547	-1.31438	FLJ45340	0.537257	0.53985	0.022795	0.3565	0.40516	-0.568916	FLJ45340	0.592694	0.164469	0.487006	-0.118879	0.597677	0.176547	0.212644	-1.31438	FLJ45340	61.0287	50.1463	61.5418	21.8956
USP16	-1.5068	0.368773	1.5068	0.368773	USP16	USP16	10600	ubiquitin specific peptidase 16	USP16	-0.0768932	0.904848	-0.329643	-0.0253786	USP16	12.917	13.672	0.413977	8.57249	8.6202	-0.177511	USP16	9.1917	-0.0768932	18.1522	0.904848	7.71455	-0.329643	9.52584	-0.0253786	USP16	260.122	513.743	218.43	269.715
HEATR5A	-1.5067	0.358688	1.5067	0.358688	HEATR5A	HEATR5A	25938	HEAT repeat containing 5A	HEATR5A	-0.300981	0.692172	-0.456836	-0.33475	HEATR5A	4.00786	4.24763	0.195596	2.66003	2.66242	-0.395793	HEATR5A	2.84072	-0.300981	5.65454	0.692172	2.54983	-0.456836	2.775	-0.33475	HEATR5A	222.104	442.106	199.361	216.966
INPP4A	-1.50535	0.286047	1.50535	0.286047	INPP4A	INPP4A	3631	inositol polyphosphate-4-phosphatase, type I, 107kDa	INPP4A	-0.433611	0.36173	-0.529503	-0.72257	INPP4A	8.02313	8.32986	-0.0359406	5.32975	5.34169	-0.626036	INPP4A	6.09022	-0.433611	10.5695	0.36173	5.69858	-0.529503	4.9848	-0.72257	INPP4A	407.191	644.738	365.784	326.444
CYP2C9	-1.50527	0.82838	1.50527	0.82838	CYP2C9	CYP2C9	1559	cytochrome P450, family 2, subfamily C, polypeptide 9	CYP2C9	2.08133	-0.108378	2.52648	-1.73356	CYP2C9	0.774843	1.00888	0.986478	0.514754	1.1854	0.396458	CYP2C9	1.655	2.08133	0.362768	-0.108378	2.2532	2.52648	0.117598	-1.73356	CYP2C9	28.0132	6.14036	38.1386	1.99051
ZC3H7B	-1.50468	0.0591356	1.50468	0.0591356	ZC3H7B	ZC3H7B	23264	zinc finger CCCH-type containing 7B	ZC3H7B	0.192905	0.493063	-0.245351	-0.247593	ZC3H7B	1.03429	1.03989	0.342984	0.687383	0.687383	-0.246472	ZC3H7B	0.932104	0.192905	1.14768	0.493063	0.687917	-0.245351	0.686849	-0.247593	ZC3H7B	54.0254	66.5205	39.8722	39.8103
LOC100630923	-1.50427	0.437914	1.50427	0.437914	LOC100630923	LOC100630923	100630923	LOC100289561-PRKRIP1 readthrough	LOC100630923	0.528819	-0.193297	0.0739616	-0.916564	LOC100630923	5.67841	5.85717	0.167761	3.77486	3.99948	-0.421301	LOC100630923	7.29316	0.528819	4.42117	-0.193297	5.32096	0.0739616	2.67801	-0.916564	LOC100630923	201.868	122.374	147.28	74.1248
LOC100129917	-1.50426	0.48428	1.50426	0.48428	LOC100129917	LOC100129917	100129917	uncharacterized LOC100129917	LOC100129917	0.783886	-0.136632	0.251273	-0.782135	LOC100129917	2.02828	2.13238	0.323627	1.34836	1.43576	-0.265431	LOC100129917	2.79049	0.783886	1.47427	-0.136632	1.92907	0.251273	0.942456	-0.782135	LOC100129917	31.0146	22.5146	29.4707	10.9478
DLEU2L	-1.504	0.52481	1.504	0.52481	DLEU2L	DLEU2L	79469	deleted in lymphocytic leukemia 2-like	DLEU2L	-0.305219	0.897386	-0.775183	0.189739	DLEU2L	1.22755	1.33573	0.296083	0.816191	0.862256	-0.292722	DLEU2L	0.809151	-0.305219	1.8623	0.897386	0.584193	-0.775183	1.14032	0.189739	DLEU2L	12.0056	27.6316	8.66786	16.9194
FPGS	-1.5035	0.351216	1.5035	0.351216	FPGS	FPGS	2356	folylpolyglutamate synthase	FPGS	-0.296349	0.679506	-0.400325	-0.393158	FPGS	28.4177	30.0585	0.191579	18.9011	18.9012	-0.396742	FPGS	20.2632	-0.296349	39.8538	0.679506	18.8542	-0.400325	18.9481	-0.393158	FPGS	472.222	928.217	439.461	441.894
ABHD16B	-1.50348	0.50382	1.50348	0.50382	ABHD16B	ABHD16B	140701	abhydrolase domain containing 16B	ABHD16B	0.0768828	0.283591	0.312468	-1.1286	ABHD16B	2.61063	2.61733	0.180237	1.7364	1.95749	-0.408067	ABHD16B	2.43015	0.0768828	2.80452	0.283591	2.86122	0.312468	1.05377	-1.1286	ABHD16B	39.0183	45.0293	45.9397	16.9194
FURIN	-1.50288	0.435463	1.50288	0.435463	FURIN	FURIN	5045	furin (paired basic amino acid cleaving enzyme)	FURIN	-0.56053	0.497802	-0.320434	-0.917757	FURIN	7.91556	8.45402	-0.031364	5.26692	5.38018	-0.619095	FURIN	5.48513	-0.56053	11.4229	0.497802	6.47833	-0.320434	4.28204	-0.917757	FURIN	223.105	464.62	263.503	174.17
KLHL17	-1.50275	0.308305	1.50275	0.308305	KLHL17	KLHL17	339451	kelch-like 17 (Drosophila)	KLHL17	0.0573067	-0.243913	-0.274074	-1.08774	KLHL17	4.52037	4.54502	-0.0933031	3.00807	3.12846	-0.680905	KLHL17	5.01778	0.0573067	4.07226	-0.243913	3.98801	-0.274074	2.26892	-1.08774	KLHL17	121.057	98.2457	96.2133	54.7391
LIMCH1	-1.50174	0.557235	1.50174	0.557235	LIMCH1	LIMCH1	22998	LIM and calponin homology domains 1	LIMCH1	-0.928495	0.750458	-0.706364	-0.644948	LIMCH1	16.9031	19.8463	-0.0890183	11.2557	11.2582	-0.675656	LIMCH1	9.44623	-0.928495	30.2464	0.750458	11.0186	-0.706364	11.4978	-0.644948	LIMCH1	561.264	1788.89	651.823	677.77
IRS2	-1.5013	0.507245	1.5013	0.507245	IRS2	IRS2	8660	insulin receptor substrate 2	IRS2	0.296477	0.0219785	0.292034	-1.146	IRS2	0.955041	0.959366	0.159228	0.636144	0.716797	-0.426982	IRS2	1.05036	0.296477	0.868372	0.0219785	1.04713	0.292034	0.386465	-1.146	IRS2	73.0343	60.3802	72.81	26.8719
SMAD9	-1.50127	0.553037	1.50127	0.553037	SMAD9	SMAD9	4093	SMAD family member 9	SMAD9	-1.15741	0.245783	-1.48464	-0.59934	SMAD9	0.753292	0.844136	-0.455812	0.501771	0.525575	-1.04199	SMAD9	0.463193	-1.15741	1.22508	0.245783	0.369194	-1.48464	0.681957	-0.59934	SMAD9	25.0118	67.5439	19.9361	36.8245
EXOSC2	-1.50086	0.436283	1.50086	0.436283	EXOSC2	EXOSC2	23404	exosome component 2	EXOSC2	-0.375924	0.828526	-0.434839	-0.284148	EXOSC2	32.4865	35.3582	0.226301	21.6452	21.6748	-0.359493	EXOSC2	21.4001	-0.375924	49.3164	0.828526	20.5438	-0.434839	22.8057	-0.284148	EXOSC2	435.205	1002.93	417.791	463.79
HSPA12A	-1.50082	0.666848	1.50082	0.666848	HSPA12A	HSPA12A	259217	heat shock 70kDa protein 12A	HSPA12A	-1.56773	0.600304	-1.51557	-0.623358	HSPA12A	2.29124	2.96904	-0.483714	1.52666	1.60023	-1.06947	HSPA12A	1.08081	-1.56773	4.85728	0.600304	1.1206	-1.51557	2.07986	-0.623358	HSPA12A	61.0287	274.269	63.2754	117.44
JMY	-1.50033	0.476361	1.50033	0.476361	JMY	JMY	133746	junction mediating and regulatory protein, p53 cofactor	JMY	0.977673	0.142144	0.502683	-0.553428	JMY	3.77109	3.93031	0.559909	2.51351	2.68377	-0.0253721	JMY	5.03764	0.977673	2.82298	0.142144	3.62444	0.502683	1.74309	-0.553428	JMY	460.216	257.895	331.112	159.241
MED12	-1.49889	0.0726923	1.49889	0.0726923	MED12	MED12	9968	mediator complex subunit 12	MED12	0.271157	0.225425	-0.170529	-0.500687	MED12	8.33468	8.33573	0.248291	5.56055	5.59699	-0.335608	MED12	8.46783	0.271157	8.20362	0.225425	6.23464	-0.170529	4.95934	-0.500687	MED12	586.276	567.983	431.659	343.364
FBXL13	-1.49841	0.548758	1.49841	0.548758	FBXL13	FBXL13	222235	F-box and leucine-rich repeat protein 13	FBXL13	1.21503	-0.404544	-0.277698	-0.0786778	FBXL13	1.25632	1.45947	0.405242	0.838434	0.840429	-0.178188	FBXL13	2.20226	1.21503	0.716686	-0.404544	0.782552	-0.277698	0.898306	-0.0786778	FBXL13	59.0278	20.4679	20.8029	25.8767
GREB1L	-1.49808	0.469539	1.49808	0.469539	GREB1L	GREB1L	80000	growth regulation by estrogen in breast cancer-like	GREB1L	-0.224465	0.923696	-0.556928	0.0899294	GREB1L	0.298657	0.322615	0.349616	0.19936	0.204391	-0.233499	GREB1L	0.200612	-0.224465	0.444619	0.923696	0.159322	-0.556928	0.249459	0.0899294	GREB1L	12.0056	26.6082	9.53465	14.9288
XYLB	-1.49797	0.476441	1.49797	0.476441	XYLB	XYLB	9942	xylulokinase homolog (H. influenzae)	XYLB	0.420196	0.391997	-0.847616	0.493795	XYLB	3.36883	3.369	0.406097	2.24894	2.49638	-0.176911	XYLB	3.40192	0.420196	3.33607	0.391997	1.41278	-0.847616	3.57997	0.493795	XYLB	121.057	118.714	50.2736	127.393
TMEM81	-1.49728	0.222819	1.49728	0.222819	TMEM81	TMEM81	388730	transmembrane protein 81	TMEM81	-0.279823	0.380887	-0.486753	-0.576868	TMEM81	1.20227	1.23393	0.0505321	0.802969	0.803361	-0.53181	TMEM81	0.956213	-0.279823	1.51164	0.380887	0.828443	-0.486753	0.778279	-0.576868	TMEM81	11.0052	17.3977	9.53465	8.95731
ITPR2	-1.49657	0.360444	1.49657	0.360444	ITPR2	ITPR2	3709	inositol 1,4,5-trisphosphate receptor, type 2	ITPR2	-0.0737742	0.101352	-1.05443	-0.0813116	ITPR2	0.890283	0.891923	0.0137887	0.594883	0.629036	-0.56787	ITPR2	0.837855	-0.0737742	0.945991	0.101352	0.424583	-1.05443	0.833489	-0.0813116	ITPR2	106.05	119.737	53.7407	105.497
PEAK1	-1.49616	0.17671	1.49616	0.17671	PEAK1	PEAK1	79834	NKF3 kinase family member	PEAK1	0.346787	0.206626	-0.579125	-0.0299816	PEAK1	1.49109	1.49285	0.276707	0.996615	1.01472	-0.304553	PEAK1	1.56531	0.346787	1.42039	0.206626	0.823897	-0.579125	1.20554	-0.0299816	PEAK1	186.087	168.86	97.9468	143.317
PLEKHH2	-1.49606	0.0768814	1.49606	0.0768814	PLEKHH2	PLEKHH2	130271	pleckstrin homology domain containing, family H (with MyTH4 domain) member 2	PLEKHH2	0.522086	0.259767	-0.0802497	-0.300236	PLEKHH2	1.93067	1.93865	0.390927	1.2905	1.29425	-0.190243	PLEKHH2	2.11442	0.522086	1.76289	0.259767	1.39274	-0.0802497	1.19577	-0.300236	PLEKHH2	146.069	121.784	96.2133	82.6063
LOC728537	-1.49602	0.0714587	1.49602	0.0714587	LOC728537	LOC728537	728537	uncharacterized LOC728537	LOC728537	0.297881	0.205037	-0.172079	-0.487258	LOC728537	0.977912	0.978418	0.251459	0.653676	0.65758	-0.329669	LOC728537	1.00989	0.297881	0.946946	0.205037	0.729125	-0.172079	0.586035	-0.487258	LOC728537	12.0056	11.2573	8.66786	6.9668
TCEA2	-1.49597	0.551736	1.49597	0.551736	TCEA2	TCEA2	6919	transcription elongation factor A (SII), 2	TCEA2	0.108121	0.0930166	0.338816	-1.29983	TCEA2	31.5002	31.5006	0.100569	21.0567	24.5447	-0.480509	TCEA2	31.6655	0.108121	31.3357	0.0930166	37.1563	0.338816	11.933	-1.29983	TCEA2	491.231	486.112	576.413	185.118
C12orf61	-1.49533	0.227676	1.49533	0.227676	C12orf61	C12orf61	283416	chromosome 12 open reading frame 61	C12orf61	0.730213	0.400321	0.279355	-0.309744	C12orf61	2.65699	2.67437	0.565267	1.77686	1.81402	-0.0151946	C12orf61	2.97881	0.730213	2.36993	0.400321	2.17932	0.279355	1.44872	-0.309744	C12orf61	45.0212	35.8188	32.9379	21.8956
PARD3B	-1.49495	0.473816	1.49495	0.473816	PARD3B	PARD3B	117583	par-3 partitioning defective 3 homolog B (C. elegans)	PARD3B	0.706333	-0.595644	-0.399584	-0.649922	PARD3B	0.896179	0.988973	0.0553445	0.599471	0.601728	-0.524753	PARD3B	1.40722	0.706333	0.570726	-0.595644	0.653804	-0.399584	0.549653	-0.649922	PARD3B	112.053	45.0293	52.0072	43.7913
EP400	-1.49426	0.0151016	1.49426	0.0151016	EP400	EP400	57634	E1A binding protein p400	EP400	0.0518363	0.0344768	-0.46478	-0.607779	EP400	0.705737	0.70575	0.0431565	0.472297	0.472878	-0.536279	EP400	0.709996	0.0518363	0.701504	0.0344768	0.496294	-0.46478	0.449461	-0.607779	EP400	88.0414	86.9884	61.5418	55.7344
C9orf9	-1.49418	0.498431	1.49418	0.498431	C9orf9	C9orf9	11092	chromosome 9 open reading frame 9	C9orf9	0.0185434	0.72929	0.405293	-0.816161	C9orf9	13.4559	13.8661	0.373917	9.00553	9.82456	-0.205434	C9orf9	10.518	0.0185434	17.2143	0.72929	13.7517	0.405293	5.89742	-0.816161	C9orf9	55.0259	90.0586	71.9432	30.853
CCNL2	-1.49412	0.482307	1.49412	0.482307	CCNL2	CCNL2	81669	cyclin L2	CCNL2	0.498505	-0.204888	0.145954	-1.01094	CCNL2	123.87	127.569	0.146808	82.905	89.6586	-0.432492	CCNL2	158.066	0.498505	97.0725	-0.204888	123.797	0.145954	55.5202	-1.01094	CCNL2	2635.24	1640.5	2119.29	928.574
SAMD4A	-1.49344	0.381388	1.49344	0.381388	SAMD4A	SAMD4A	23034	sterile alpha motif domain containing 4A	SAMD4A	-0.496543	0.434252	-0.840997	-0.378565	SAMD4A	0.466532	0.491018	-0.0311454	0.312389	0.316409	-0.609781	SAMD4A	0.337896	-0.496543	0.64414	0.434252	0.266129	-0.840997	0.366689	-0.378565	SAMD4A	22.0103	41.9591	17.3357	23.8862
COLQ	-1.49299	0.181895	1.49299	0.181895	COLQ	COLQ	8292	collagen-like tail subunit (single strand of homotrimer) of asymmetric acetylcholinesterase	COLQ	0.9025	0.432672	0.254943	-0.0761846	COLQ	0.523679	0.530637	0.667586	0.350758	0.353071	0.0893793	COLQ	0.616285	0.9025	0.444989	0.432672	0.393412	0.254943	0.312729	-0.0761846	COLQ	17.008	12.2807	11.2682	8.95731
LOC340544	-1.49195	0.299672	1.49195	0.299672	LOC340544				LOC340544	0.49036	0.273363	0.20627	-0.596943	LOC340544	0.647609	0.649442	0.381861	0.434069	0.450997	-0.195336	LOC340544	0.698191	0.49036	0.600692	0.273363	0.573396	0.20627	0.328597	-0.596943	LOC340544	19.0321	16.3744	15.6303	8.95731
PRRG4	-1.49177	0.45322	1.49177	0.45322	PRRG4	PRRG4	79056	proline rich Gla (G-carboxyglutamic acid) 4 (transmembrane)	PRRG4	0.497613	0.208368	0.383789	-0.831859	PRRG4	0.248723	0.249974	0.352991	0.16673	0.181748	-0.224035	PRRG4	0.274949	0.497613	0.224999	0.208368	0.25409	0.383789	0.109406	-0.831859	PRRG4	15.0071	12.2807	13.8686	5.97154
GSTM1	-1.49177	0.503086	1.49177	0.503086	GSTM1	GSTM1	2944	glutathione S-transferase mu 1	GSTM1	-0.284809	0.484837	-1.07671	0.122691	GSTM1	0.391748	0.405767	0.100014	0.262607	0.285623	-0.477008	GSTM1	0.300029	-0.284809	0.511505	0.484837	0.173292	-1.07671	0.397954	0.122691	GSTM1	3.00141	5.11697	1.73357	3.98103
LOC100271836	-1.49176	0.415353	1.49176	0.415353	LOC100271836	LOC100271836	100271836	smg-1 homolog, phosphatidylinositol 3-kinase-related kinase (C. elegans) pseudogene	LOC100271836	0.816852	-0.209362	-0.0339343	-0.512614	LOC100271836	0.353316	0.375899	0.303745	0.236845	0.240112	-0.273274	LOC100271836	0.504225	0.816852	0.247573	-0.209362	0.279584	-0.0339343	0.200639	-0.512614	LOC100271836	25.0118	12.2807	13.8686	9.95257
EGF	-1.4914	0.141768	1.4914	0.141768	EGF	EGF	1950	epidermal growth factor	EGF	0.583913	0.106901	-0.282082	-0.180435	EGF	1.14566	1.16135	0.345407	0.768175	0.768652	-0.231258	EGF	1.35161	0.583913	0.971083	0.106901	0.741585	-0.282082	0.795719	-0.180435	EGF	73.0343	53.2164	39.8722	42.796
KANSL3	-1.49061	0.136338	1.49061	0.136338	KANSL3	KANSL3	55683	KAT8 regulatory NSL complex subunit 3	KANSL3	-0.144709	0.263683	-0.394789	-0.638042	KANSL3	29.2277	29.5209	0.0594873	19.6079	19.6776	-0.516416	KANSL3	25.3703	-0.144709	33.6716	0.263683	21.3326	-0.394789	18.0226	-0.638042	KANSL3	1312.62	1736.7	1103.42	930.565
YPEL2	-1.48934	0.648597	1.48934	0.648597	YPEL2	YPEL2	388403	yippee-like 2 (Drosophila)	YPEL2	0.825202	-0.387591	0.540996	-1.25272	YPEL2	5.63292	6.13787	0.218806	3.78217	4.53683	-0.355864	YPEL2	8.57585	0.825202	3.6999	-0.387591	7.04243	0.540996	2.03123	-1.25272	YPEL2	441.207	190.351	362.317	104.502
C12orf51	-1.48855	0.186186	1.48855	0.186186	C12orf51	HECTD4	283450	HECT domain containing E3 ubiquitin protein ligase 4	C12orf51	0.415541	0.0286151	-0.136084	-0.567569	C12orf51	2.95401	2.98061	0.222078	1.98449	2.00672	-0.351827	C12orf51	3.37792	0.415541	2.58329	0.0286151	2.30459	-0.136084	1.70885	-0.567569	C12orf51	527.248	403.217	359.716	266.729
RASL11B	-1.48845	0.347693	1.48845	0.347693	RASL11B	RASL11B	65997	RAS-like, family 11, member B	RASL11B	0.346861	-0.427808	-0.345497	-0.883069	RASL11B	0.298964	0.309804	-0.0404736	0.200856	0.204352	-0.614283	RASL11B	0.391037	0.346861	0.22857	-0.427808	0.24199	-0.345497	0.166714	-0.883069	RASL11B	7.00329	4.09357	4.33393	2.98577
RGS16	-1.48845	0.444682	1.48845	0.444682	RGS16	RGS16	6004	regulator of G-protein signaling 16	RGS16	-0.218851	-0.993524	-1.64817	-0.711815	RGS16	0.235107	0.243632	-0.606187	0.157955	0.166346	-1.17999	RGS16	0.307515	-0.218851	0.179749	-0.993524	0.114182	-1.64817	0.218509	-0.711815	RGS16	7.00329	4.09357	2.60036	4.97628
RPS10P7	-1.48844	0.53521	1.48845	0.53521	RPS10P7	RPS10P7	376693	ribosomal protein S10 pseudogene 7	RPS10P7	0.453742	0.293781	0.568741	-0.968829	RPS10P7	1.53768	1.54004	0.373762	1.03308	1.18326	-0.200044	RPS10P7	1.62533	0.453742	1.45475	0.293781	1.76019	0.568741	0.606324	-0.968829	RPS10P7	8.00376	7.16375	8.66786	2.98577
UNC5CL	-1.48844	0.384065	1.48844	0.384065	UNC5CL	UNC5CL	222643	unc-5 homolog C (C. elegans)-like	UNC5CL	0.13493	0.945215	0.29057	-0.358036	UNC5CL	0.93045	0.96738	0.540072	0.625116	0.640976	-0.0337327	UNC5CL	0.70264	0.13493	1.23212	0.945215	0.782682	0.29057	0.49927	-0.358036	UNC5CL	21.0099	36.8421	23.4032	14.9288
DGKD	-1.48825	0.221543	1.48825	0.221543	DGKD	DGKD	8527	diacylglycerol kinase, delta 130kDa	DGKD	0.0170459	0.0340451	-0.221126	-0.875024	DGKD	7.41147	7.4116	0.0255455	4.97998	5.10841	-0.548075	DGKD	7.36793	0.0170459	7.45526	0.0340451	6.24667	-0.221126	3.97014	-0.875024	DGKD	457.215	464.62	389.187	245.828
IKBKB	-1.48819	0.106012	1.48819	0.106012	IKBKB	IKBKB	3551	inhibitor of kappa light polypeptide gene enhancer in B-cells, kinase beta	IKBKB	-0.0219509	0.274593	-0.308176	-0.586306	IKBKB	15.6553	15.7381	0.126321	10.5197	10.5686	-0.447241	IKBKB	14.1263	-0.0219509	17.3499	0.274593	11.5842	-0.308176	9.55302	-0.586306	IKBKB	553.26	689.767	462.864	373.221
WDR31	-1.48784	0.345261	1.48784	0.345261	WDR31	WDR31	114987	WD repeat domain 31	WDR31	-0.176317	0.719801	-0.436389	-0.166574	WDR31	4.81774	5.05196	0.271742	3.23807	3.25224	-0.301482	WDR31	3.53154	-0.176317	6.57238	0.719801	2.949	-0.436389	3.55547	-0.166574	WDR31	83.039	154.532	69.3429	83.6016
C10orf95	-1.48777	0.377778	1.48777	0.377778	C10orf95	C10orf95	79946	chromosome 10 open reading frame 95	C10orf95	0.0665261	0.600456	0.194765	-0.674094	C10orf95	0.640272	0.651265	0.333491	0.430355	0.450014	-0.239665	C10orf95	0.532108	0.0665261	0.770422	0.600456	0.581572	0.194765	0.318457	-0.674094	C10orf95	6.87062	9.94776	7.50931	4.11194
KANSL1	-1.48669	0.159891	1.48669	0.159891	KANSL1	KANSL1	284058	KAT8 regulatory NSL complex subunit 1	KANSL1	0.308473	0.165983	-0.0835901	-0.586166	KANSL1	7.85869	7.86827	0.237228	5.28602	5.36641	-0.334878	KANSL1	8.25652	0.308473	7.48003	0.165983	6.29179	-0.0835901	4.44103	-0.586166	KANSL1	413.193	374.561	313.776	223.933
DCDC2B	-1.48527	0.32335	1.48527	0.32335	DCDC2B	DCDC2B	149069	doublecortin domain containing 2B	DCDC2B	0.728214	0.253934	0.289958	-0.449256	DCDC2B	1.96165	1.98821	0.491074	1.32073	1.36431	-0.0796492	DCDC2B	2.3121	0.728214	1.66431	0.253934	1.70639	0.289958	1.02224	-0.449256	DCDC2B	27.0127	19.4445	19.9361	11.9431
FLNB	-1.48516	0.242084	1.48516	0.242084	FLNB	FLNB	2317	filamin B, beta	FLNB	0.0285233	0.682001	-0.333046	-0.0976633	FLNB	9.21697	9.45436	0.355262	6.20605	6.22672	-0.215354	FLNB	7.34903	0.0285233	11.5597	0.682001	5.71988	-0.333046	6.73355	-0.0976633	FLNB	694.326	1096.05	541.741	637.959
PHKA1	-1.48509	0.311788	1.48509	0.311788	PHKA1	PHKA1	5255	phosphorylase kinase, alpha 1 (muscle)	PHKA1	-0.242796	0.531835	-0.601736	-0.250329	PHKA1	6.26608	6.49326	0.144519	4.21933	4.25066	-0.426032	PHKA1	4.79074	-0.242796	8.19577	0.531835	3.73552	-0.601736	4.76579	-0.250329	PHKA1	290.136	496.346	226.231	288.624
LOC388588	-1.48465	0.60616	1.48465	0.60616	LOC388588				LOC388588	0.5089	-0.836929	-0.0765409	-1.39172	LOC388588	4.71561	5.23793	-0.164014	3.17625	3.51195	-0.734132	LOC388588	7.51805	0.5089	2.95781	-0.836929	5.01037	-0.0765409	2.01354	-1.39172	LOC388588	26.0122	10.2339	17.3357	6.9668
C16orf86	-1.48464	0.325793	1.48464	0.325793	C16orf86	C16orf86	388284	chromosome 16 open reading frame 86	C16orf86	0.90097	0.0405665	-0.199046	0.000347053	C16orf86	0.888497	0.928292	0.470768	0.598457	0.599887	-0.0993496	C16orf86	1.19718	0.90097	0.659405	0.0405665	0.558498	-0.199046	0.641276	0.000347053	C16orf86	13.0061	7.16375	6.0675	6.9668
SH3PXD2B	-1.48451	0.344195	1.48451	0.344195	SH3PXD2B	SH3PXD2B	285590	SH3 and PX domains 2B	SH3PXD2B	0.0845844	0.880565	-0.325879	0.151051	SH3PXD2B	1.29261	1.3421	0.482575	0.870728	0.88265	-0.0874139	SH3PXD2B	0.980978	0.0845844	1.70323	0.880565	0.73807	-0.325879	1.02723	0.151051	SH3PXD2B	76.0357	132.018	57.2079	79.6205
PAN2	-1.48406	0.372048	1.48406	0.372048	PAN2	PAN2	9924	PAN2 poly(A) specific ribonuclease subunit homolog (S. cerevisiae)	PAN2	0.480235	-0.0548212	0.0645307	-0.778212	PAN2	20.3688	20.72	0.212707	13.7251	14.3147	-0.356841	PAN2	24.5188	0.480235	16.9212	-0.0548212	18.3806	0.0645307	10.2487	-0.778212	PAN2	1277.6	881.134	956.926	534.453
IL28RA	-1.48397	0.194589	1.48397	0.194589	IL28RA	IL28RA	163702	interleukin 28 receptor, alpha (interferon, lambda receptor)	IL28RA	0.0453534	0.338155	-0.120066	-0.635356	IL28RA	1.30623	1.31296	0.191754	0.880224	0.894297	-0.377711	IL28RA	1.18018	0.0453534	1.44574	0.338155	1.05233	-0.120066	0.736265	-0.635356	IL28RA	52.0245	64.4738	46.8064	31.8482
FUBP3	-1.4836	0.440506	1.4836	0.440506	FUBP3	FUBP3	8939	far upstream element (FUSE) binding protein 3	FUBP3	-0.601551	0.525142	-0.412321	-0.802285	FUBP3	36.717	39.5519	-0.0382043	24.7486	24.975	-0.607303	FUBP3	24.8475	-0.601551	54.2564	0.525142	28.33	-0.412321	21.62	-0.802285	FUBP3	750.353	1638.45	855.518	652.888
MLXIPL	-1.48306	0.750826	1.48306	0.750826	MLXIPL	MLXIPL	51085	MLX interacting protein-like	MLXIPL	0.682949	-0.284638	1.11642	-1.85527	MLXIPL	0.789829	0.834657	0.199155	0.532566	0.840884	-0.369424	MLXIPL	1.10451	0.682949	0.564803	-0.284638	1.49162	1.11642	0.190147	-1.85527	MLXIPL	34.016	17.3977	46.8064	5.97154
ENDOU	-1.48283	0.0695657	1.48283	0.0695657	ENDOU	ENDOU	8909	endonuclease, polyU-specific	ENDOU	0.0996902	0.132374	-0.609758	-0.294879	ENDOU	0.81466	0.814712	0.116032	0.549396	0.552671	-0.452318	ENDOU	0.805484	0.0996902	0.82394	0.132374	0.492597	-0.609758	0.612745	-0.294879	ENDOU	17.008	17.3977	10.4014	12.9383
ASB6	-1.4821	0.0469553	1.4821	0.0469553	ASB6	ASB6	140459	ankyrin repeat and SOCS box containing 6	ASB6	-0.111854	0.140546	-0.571744	-0.534857	ASB6	10.526	10.5663	0.0143457	7.10204	7.10262	-0.553301	ASB6	9.64433	-0.111854	11.4882	0.140546	7.01183	-0.571744	7.19342	-0.534857	ASB6	435.926	519.276	315.623	325.149
BCS1L	-1.4821	0.358958	1.4821	0.358958	BCS1L	BCS1L	617	BCS1-like (S. cerevisiae)	BCS1L	-0.199981	0.541225	-0.702967	-0.0910801	BCS1L	16.1747	16.7113	0.170622	10.9134	11.1597	-0.397023	BCS1L	12.5105	-0.199981	20.9122	0.541225	8.82797	-0.702967	13.4914	-0.0910801	BCS1L	170.08	276.316	121.35	177.156
SSH2	-1.48207	0.34899	1.48207	0.34899	SSH2	SSH2	85464	slingshot homolog 2 (Drosophila)	SSH2	-0.257265	0.637283	-0.515272	-0.239932	SSH2	5.13021	5.37875	0.190009	3.46153	3.4773	-0.377602	SSH2	3.76264	-0.257265	6.99485	0.637283	3.14648	-0.515272	3.80812	-0.239932	SSH2	345.163	641.668	288.641	349.336
C5orf25	-1.48183	0.285398	1.48183	0.285398	C5orf25	C5orf25	375484	chromosome 5 open reading frame 25	C5orf25	-0.340598	0.444864	-0.513844	-0.516641	C5orf25	8.8057	9.13399	0.0521331	5.94247	5.94247	-0.515243	C5orf25	6.70718	-0.340598	11.5608	0.444864	5.94823	-0.513844	5.93671	-0.516641	C5orf25	127.06	219.006	112.682	112.464
MAN2A2	-1.48047	0.445699	1.48047	0.445699	MAN2A2	MAN2A2	4122	mannosidase, alpha, class 2A, member 2	MAN2A2	0.0692857	-0.00465099	0.0661415	-1.13362	MAN2A2	11.9092	11.9131	0.0323174	8.04419	8.74967	-0.533738	MAN2A2	12.2183	0.0692857	11.6079	-0.00465099	12.1917	0.0661415	5.30763	-1.13362	MAN2A2	758.357	720.469	756.704	329.43
ZNF219	-1.47981	0.0142469	1.47981	0.0142469	ZNF219	ZNF219	51222	zinc finger protein 219	ZNF219	-0.0628685	-0.123783	-0.719778	-0.597694	ZNF219	1.71813	1.71851	-0.0933259	1.16105	1.16209	-0.658736	ZNF219	1.75479	-0.0628685	1.68224	-0.123783	1.11295	-0.719778	1.21123	-0.597694	ZNF219	49.023	47.0761	31.2043	33.8387
LINC00472	-1.47951	0.580382	1.47951	0.580382	LINC00472	LINC00472	79940	long intergenic non-protein coding RNA 472	LINC00472	0.51887	-0.198905	0.381235	-1.19151	LINC00472	21.0239	21.6777	0.159982	14.2101	16.3737	-0.405135	LINC00472	26.9618	0.51887	16.3937	-0.198905	24.5085	0.381235	8.239	-1.19151	LINC00472	752.354	457.457	683.894	229.904
MYL9	-1.47935	0.48853	1.47935	0.48853	MYL9	MYL9	10398	myosin, light chain 9, regulatory	MYL9	-0.755167	0.441604	-0.417768	-1.02572	MYL9	3.5899	3.90314	-0.156781	2.42667	2.48074	-0.721746	MYL9	2.3711	-0.755167	5.43518	0.441604	2.99583	-0.417768	1.96564	-1.02572	MYL9	24.0113	54.2398	30.3375	19.9051
FKBP7	-1.47895	0.485563	1.47895	0.485563	FKBP7	FKBP7	51661	FK506 binding protein 7	FKBP7	-0.0631367	0.65213	0.291114	-0.831274	FKBP7	2.83522	2.92278	0.294496	1.91704	2.06392	-0.27008	FKBP7	2.21273	-0.0631367	3.63283	0.65213	2.82858	0.291114	1.29926	-0.831274	FKBP7	61.0288	100.293	78.0127	35.8292
C9orf114	-1.4788	0.321658	1.4788	0.321658	C9orf114	C9orf114	51490	chromosome 9 open reading frame 114	C9orf114	-0.253151	0.605143	-0.336354	-0.440507	C9orf114	16.4676	17.2016	0.175996	11.1358	11.1431	-0.38843	C9orf114	12.2305	-0.253151	22.1726	0.605143	11.5451	-0.336354	10.741	-0.440507	C9orf114	510.746	925.927	482.125	448.543
BOK	-1.47824	0.429583	1.47824	0.429583	BOK	BOK	666	BCL2-related ovarian killer	BOK	-0.349	0.460764	-0.915053	-0.100941	BOK	12.0392	12.5164	0.0558821	8.14426	8.47059	-0.507997	BOK	9.09315	-0.349	15.9396	0.460764	6.14208	-0.915053	10.7991	-0.100941	BOK	227.107	398.1	153.402	269.715
RFX7	-1.47811	0.187766	1.47811	0.187766	RFX7	RFX7	64864	regulatory factor X, 7	RFX7	0.173667	0.432289	-0.516204	-0.00535222	RFX7	5.32231	5.3437	0.302978	3.60075	3.65733	-0.260778	RFX7	4.86602	0.173667	5.82139	0.432289	3.01649	-0.516204	4.29817	-0.00535222	RFX7	348.164	416.521	215.83	307.534
SIDT2	-1.47785	0.190216	1.47785	0.190216	SIDT2	SIDT2	51092	SID1 transmembrane family, member 2	SIDT2	0.2837	0.333675	0.0328047	-0.542427	SIDT2	0.929525	0.929664	0.308687	0.628972	0.641512	-0.254811	SIDT2	0.913564	0.2837	0.945764	0.333675	0.767736	0.0328047	0.515288	-0.542427	SIDT2	34.717	35.9406	29.1753	19.5818
TGM2	-1.47653	0.678578	1.47653	0.678578	TGM2	TGM2	7052	transglutaminase 2 (C polypeptide, protein-glutamine-gamma-glutamyltransferase)	TGM2	0.260569	-0.645476	0.325366	-1.83469	TGM2	45.6838	47.9547	-0.192453	30.94	40.0224	-0.754664	TGM2	62.5368	0.260569	33.3725	-0.645476	65.4096	0.325366	14.6352	-1.83469	TGM2	2302.08	1189.18	2425.27	503.6
MED27	-1.47523	0.406268	1.47523	0.406268	MED27	MED27	9442	mediator complex subunit 27	MED27	-0.0995353	0.747781	-0.56769	0.0940615	MED27	17.3508	18.1044	0.324123	11.7615	12.0721	-0.236814	MED27	12.9356	-0.0995353	23.2731	0.747781	9.351	-0.56769	14.7933	0.0940615	MED27	154.072	264.035	113.549	170.189
FLJ35282	-1.4751	0.474702	1.4751	0.474702	FLJ35282	FLJ35282	441389	uncharacterized LOC441389	FLJ35282	1.17298	0.331192	0.676542	-0.293989	FLJ35282	0.375305	0.39139	0.752086	0.254427	0.268956	0.191276	FLJ35282	0.502442	1.17298	0.280338	0.331192	0.356158	0.676542	0.181754	-0.293989	FLJ35282	11.0052	6.14036	7.80107	3.98103
LGALS8-AS1	-1.4749	0.184941	1.4749	0.184941	LGALS8-AS1	LGALS8-AS1	100287902	LGALS8 antisense RNA 1	LGALS8-AS1	1.12206	0.582183	0.372362	0.210652	LGALS8-AS1	1.30541	1.32833	0.852122	0.885087	0.886477	0.291507	LGALS8-AS1	1.57401	1.12206	1.08265	0.582183	0.936107	0.372362	0.836847	0.210652	LGALS8-AS1	19.8563	13.6577	11.8091	10.5569
P2RY11	-1.47478	0.392737	1.47478	0.392737	P2RY11	P2RY11	5032	purinergic receptor P2Y, G-protein coupled, 11	P2RY11	-0.0830012	0.0110647	-0.0800706	-1.11287	P2RY11	1.07203	1.07259	-0.0359683	0.726904	0.77397	-0.59647	P2RY11	1.03764	-0.0830012	1.10755	0.0110647	1.03975	-0.0800706	0.508189	-1.11287	P2RY11	18.7856	20.0513	18.8237	9.2003
ATP6V1B1	-1.47406	0.657957	1.47406	0.657957	ATP6V1B1	ATP6V1B1	525	ATPase, H+ transporting, lysosomal 56/58kDa, V1 subunit B1	ATP6V1B1	0.888425	-0.383745	0.574579	-1.1895	ATP6V1B1	1.52539	1.67607	0.25234	1.03482	1.23432	-0.30746	ATP6V1B1	2.37062	0.888425	0.981523	-0.383745	1.90715	0.574579	0.561493	-1.1895	ATP6V1B1	42.0198	17.3977	33.8047	9.95257
C17orf39	-1.47382	0.0912041	1.47382	0.0912041	C17orf39	GID4	79018	GID complex subunit 4, VID24 homolog (S. cerevisiae)	C17orf39	0.128591	0.490579	-0.234461	-0.265496	C17orf39	6.44071	6.49146	0.309585	4.37007	4.37033	-0.249979	C17orf39	5.68132	0.128591	7.30161	0.490579	4.41733	-0.234461	4.32332	-0.265496	C17orf39	234.11	300.878	182.025	178.151
ZER1	-1.47354	0.271086	1.47354	0.271086	ZER1	ZER1	10444	zer-1 homolog (C. elegans)	ZER1	0.0166769	0.28633	-0.0616818	-0.753887	ZER1	16.663	16.7358	0.151503	11.3081	11.6351	-0.407784	ZER1	15.1763	0.0166769	18.2953	0.28633	14.374	-0.0616818	8.89617	-0.753887	ZER1	633.298	763.451	599.816	371.231
PILRB	-1.47281	0.55515	1.47281	0.55515	PILRB	PILRB	29990	paired immunoglobin-like type 2 receptor beta	PILRB	0.669347	-0.142481	0.388638	-0.978916	PILRB	86.2711	89.7084	0.263433	58.5758	65.279	-0.295139	PILRB	114.303	0.669347	65.1138	-0.142481	94.0927	0.388638	36.4654	-0.978916	PILRB	3152.29	1782.97	2642.8	1068.27
SERINC5	-1.4728	0.316383	1.4728	0.316383	SERINC5	SERINC5	256987	serine incorporator 5	SERINC5	0.114758	0.668331	0.151092	-0.485127	SERINC5	1.84968	1.88383	0.391544	1.2559	1.28655	-0.167018	SERINC5	1.52678	0.114758	2.24088	0.668331	1.56572	0.151092	1.00738	-0.485127	SERINC5	98.0461	133.041	100.547	64.6917
IP6K3	-1.47273	0.569596	1.47273	0.569596	IP6K3	IP6K3	117283	inositol hexakisphosphate kinase 3	IP6K3	0.228124	0.100338	0.431477	-1.22	IP6K3	2.85745	2.86025	0.164231	1.94024	2.26682	-0.394261	IP6K3	2.98684	0.228124	2.73366	0.100338	3.43896	0.431477	1.09467	-1.22	IP6K3	76.0357	69.5907	87.5454	27.8672
ZNF321P	-1.47226	0.253885	1.47226	0.253885	ZNF321P	ZNF321P	399669	zinc finger protein 321, pseudogene	ZNF321P	0.558603	0.114846	0.052115	-0.494734	ZNF321P	2.5219	2.55179	0.336724	1.71294	1.7438	-0.221309	ZNF321P	2.94117	0.558603	2.1624	0.114846	2.07039	0.052115	1.41721	-0.494734	ZNF321P	64.0301	47.0761	45.0729	30.853
TNRC6C	-1.47121	0.0917534	1.47121	0.0917534	TNRC6C	TNRC6C	57690	trinucleotide repeat containing 6C	TNRC6C	0.357538	0.152262	-0.451733	-0.152463	TNRC6C	1.76678	1.77125	0.2549	1.2009	1.20737	-0.302098	TNRC6C	1.89705	0.357538	1.64545	0.152262	1.08259	-0.451733	1.33215	-0.152463	TNRC6C	184.723	159.32	106.014	130.457
PDK4	-1.47101	0.641844	1.47101	0.641844	PDK4	PDK4	5166	pyruvate dehydrogenase kinase, isozyme 4	PDK4	0.615045	-0.247866	0.558071	-1.30451	PDK4	10.2278	10.6886	0.183589	6.95293	8.45257	-0.37322	PDK4	13.7932	0.615045	7.58408	-0.247866	13.2591	0.558071	3.64604	-1.30451	PDK4	493.232	271.199	474.132	130.379
ZNF79	-1.4703	0.317439	1.4703	0.317439	ZNF79	ZNF79	7633	zinc finger protein 79	ZNF79	-0.0687554	0.268782	-0.0703648	-0.841829	ZNF79	4.9709	5.00495	0.100013	3.38088	3.50244	-0.456097	ZNF79	4.42212	-0.0687554	5.58778	0.268782	4.41719	-0.0703648	2.58769	-0.841829	ZNF79	85.04	107.456	84.945	49.7628
LOC100130705	-1.46959	0.529911	1.46959	0.529911	LOC100130705	LOC100130705	100130705	uncharacterized LOC100130705	LOC100130705	0.940468	0.0126779	0.494345	-0.652032	LOC100130705	1.41867	1.49264	0.476573	0.965346	1.04254	-0.0788437	LOC100130705	1.95671	0.940468	1.02857	0.0126779	1.43625	0.494345	0.648838	-0.652032	LOC100130705	72.0339	37.8655	52.874	23.8862
HIST1H2AM	-1.46899	0.323186	1.46899	0.323186	HIST1H2AM	HIST1H2AM	8336	histone cluster 1, H2am	HIST1H2AM	0.88532	0.055506	-0.184108	0.0152851	HIST1H2AM	5.25547	5.47431	0.470413	3.57761	3.58616	-0.0844113	HIST1H2AM	7.00666	0.88532	3.94196	0.055506	3.33873	-0.184108	3.83358	0.0152851	HIST1H2AM	20.0094	11.2573	9.53465	10.9478
LOC728613	-1.46898	0.529744	1.46898	0.529744	LOC728613	LOC728613	728613	programmed cell death 6 pseudogene	LOC728613	0.516565	-0.261094	0.198126	-1.05228	LOC728613	3.8129	3.95223	0.127735	2.59561	2.84318	-0.427078	LOC728613	4.99235	0.516565	2.9121	-0.261094	4.00355	0.198126	1.68281	-1.05228	LOC728613	121.057	70.6141	97.08	40.8055
ARMC5	-1.46803	0.275392	1.46803	0.275392	ARMC5	ARMC5	79798	armadillo repeat containing 5	ARMC5	0.656943	-0.0415968	-0.116739	-0.375673	ARMC5	2.61577	2.6928	0.307673	1.78183	1.789	-0.246206	ARMC5	3.33227	0.656943	2.05333	-0.0415968	1.94912	-0.116739	1.62889	-0.375673	ARMC5	123.058	71.6375	70.2097	57.7249
RIOK3	-1.468	0.36374	1.468	0.36374	RIOK3	RIOK3	8780	RIO kinase 3 (yeast)	RIOK3	0.0114871	0.307523	0.0568543	-0.845558	RIOK3	21.6227	21.7366	0.159505	14.7293	15.4556	-0.394352	RIOK3	19.5143	0.0114871	23.959	0.307523	20.1377	0.0568543	10.7735	-0.845558	RIOK3	764.359	938.451	788.775	421.989
SLC47A2	-1.46775	0.479282	1.46775	0.479282	SLC47A2	SLC47A2	146802	solute carrier family 47, member 2	SLC47A2	0.820395	0.465117	0.705881	-0.527574	SLC47A2	6.65138	6.70186	0.642756	4.5317	4.95211	0.0891535	SLC47A2	7.52292	0.820395	5.88081	0.465117	6.94887	0.705881	2.95534	-0.527574	SLC47A2	157.074	125.877	147.354	61.7059
TTC9	-1.46763	0.483237	1.46763	0.483237	TTC9	TTC9	23508	tetratricopeptide repeat domain 9	TTC9	-0.654115	0.37857	-1.08344	-0.299077	TTC9	0.195285	0.207927	-0.137772	0.133062	0.138009	-0.691258	TTC9	0.136532	-0.654115	0.279321	0.37857	0.10139	-1.08344	0.174627	-0.299077	TTC9	7.00329	14.3275	5.20072	8.95731
ZNF93	-1.46734	0.432842	1.46734	0.432842	ZNF93	ZNF93	81931	zinc finger protein 93	ZNF93	-0.360497	0.764748	-0.429398	-0.272755	ZNF93	13.8943	14.9643	0.202125	9.46904	9.483	-0.351076	ZNF93	9.40741	-0.360497	20.5212	0.764748	8.96869	-0.429398	9.99731	-0.272755	ZNF93	249.117	543.422	237.499	264.738
LOC401588	-1.46699	0.320342	1.46699	0.320342	LOC401588				LOC401588	0.0329417	0.761231	0.0573293	-0.368878	LOC401588	13.6353	14.072	0.397086	9.29476	9.39635	-0.155775	LOC401588	10.5937	0.0329417	17.5503	0.761231	10.7743	0.0573293	8.0184	-0.368878	LOC401588	184.087	304.971	187.226	139.336
LOC100289230	-1.46681	0.381061	1.46681	0.381061	LOC100289230	LOC100289230	100289230	uncharacterized LOC100289230	LOC100289230	0.263634	0.772759	0.391132	-0.460106	LOC100289230	1.60721	1.63229	0.518197	1.09572	1.14375	-0.0344873	LOC100289230	1.34723	0.263634	1.91736	0.772759	1.47171	0.391132	0.815782	-0.460106	LOC100289230	23.0108	32.7486	25.1368	13.9336
DHH	-1.46669	0.615516	1.46669	0.615516	DHH	DHH	50846	desert hedgehog	DHH	1.85694	0.353573	1.11396	-0.00857639	DHH	0.974962	1.11032	1.10526	0.664735	0.715678	0.552692	DHH	1.6416	1.85694	0.579039	0.353573	0.980861	1.11396	0.450495	-0.00857639	DHH	29.0136	10.2339	17.3357	7.96205
DYRK1A	-1.4664	0.144931	1.4664	0.144931	DYRK1A	DYRK1A	1859	dual-specificity tyrosine-(Y)-phosphorylation regulated kinase 1A	DYRK1A	-0.027833	0.410639	-0.271347	-0.450413	DYRK1A	0.932226	0.94301	0.191403	0.635722	0.636947	-0.36088	DYRK1A	0.800801	-0.027833	1.08522	0.410639	0.676425	-0.271347	0.597469	-0.450413	DYRK1A	40.0188	59.3568	34.6714	29.8577
SLMO1	-1.46604	0.339956	1.46604	0.339956	SLMO1	SLMO1	10650	slowmo homolog 1 (Drosophila)	SLMO1	-0.141303	0.711635	-0.142564	-0.390959	SLMO1	1.13123	1.18101	0.285166	0.771619	0.774479	-0.266761	SLMO1	0.841723	-0.141303	1.5203	0.711635	0.840988	-0.142564	0.707971	-0.390959	SLMO1	13.0061	23.538	13.0018	10.9478
ZFYVE9	-1.46565	0.116229	1.46565	0.116229	ZFYVE9	ZFYVE9	9372	zinc finger, FYVE domain containing 9	ZFYVE9	0.279747	0.261931	-0.0744058	-0.486994	ZFYVE9	7.06678	7.06691	0.270839	4.82161	4.87099	-0.2807	ZFYVE9	7.11055	0.279747	7.02328	0.261931	5.56279	-0.0744058	4.17918	-0.486994	ZFYVE9	222.104	248.685	197.627	133.364
ABHD14A-ACY1	-1.46512	0.270673	1.46512	0.270673	ABHD14A-ACY1	ABHD14A-ACY1	100526760	ABHD14A-ACY1 readthrough (non-protein coding)	ABHD14A-ACY1	0.233319	0.711652	-0.354919	0.197857	ABHD14A-ACY1	12.3182	12.4878	0.472486	8.40765	8.56241	-0.0785311	ABHD14A-ACY1	10.4364	0.233319	14.5393	0.711652	6.94182	-0.354919	10.183	0.197857	ABHD14A-ACY1	178.574	248.778	118.78	174.238
RELB	-1.46508	0.468613	1.46508	0.468613	RELB	RELB	5971	v-rel reticuloendotheliosis viral oncogene homolog B	RELB	-0.133454	-0.50516	-0.277649	-1.46292	RELB	3.73989	3.77097	-0.319307	2.55269	2.77111	-0.870284	RELB	4.25409	-0.133454	3.28785	-0.50516	3.84946	-0.277649	1.69277	-1.46292	RELB	90.0423	69.5907	81.4779	35.8292
RNF125	-1.46475	0.179442	1.46475	0.179442	RNF125	RNF125	54941	ring finger protein 125, E3 ubiquitin protein ligase	RNF125	0.684168	0.536281	0.320514	-0.201373	RNF125	2.22238	2.2253	0.610225	1.51724	1.54212	0.0595708	RNF125	2.33925	0.684168	2.11134	0.536281	1.81805	0.320514	1.2662	-0.201373	RNF125	136.064	122.807	105.748	73.649
KIF27	-1.46455	0.333009	1.46455	0.333009	KIF27	KIF27	55582	kinesin family member 27	KIF27	0.508292	-0.124364	-0.0601951	-0.656786	KIF27	3.58497	3.67149	0.191964	2.44783	2.50034	-0.358491	KIF27	4.46385	0.508292	2.87913	-0.124364	3.01008	-0.0601951	1.99061	-0.656786	KIF27	203.095	130.994	136.952	90.5684
ARHGAP32	-1.46417	0.078129	1.46417	0.078129	ARHGAP32	ARHGAP32	9743	Rho GTPase activating protein 32	ARHGAP32	0.0897695	0.403604	-0.257479	-0.34931	ARHGAP32	2.25479	2.26814	0.246687	1.53998	1.54076	-0.303394	ARHGAP32	2.02241	0.0897695	2.51387	0.403604	1.58978	-0.257479	1.49174	-0.34931	ARHGAP32	205.096	253.801	161.222	151.279
FAM102B	-1.46387	0.160725	1.46387	0.160725	FAM102B	FAM102B	284611	family with sequence similarity 102, member B	FAM102B	0.0125144	0.342035	-0.182033	-0.562986	FAM102B	9.90187	9.96651	0.177275	6.76419	6.82323	-0.37251	FAM102B	8.83323	0.0125144	11.0998	0.342035	7.71889	-0.182033	5.92757	-0.562986	FAM102B	464.218	583.334	405.656	311.515
LOC100505678	-1.46371	0.526103	1.46371	0.526103	LOC100505678				LOC100505678	0.511463	-0.932839	-0.755318	-0.765313	LOC100505678	0.282055	0.318135	-0.210688	0.192699	0.1927	-0.760315	LOC100505678	0.46529	0.511463	0.17098	-0.932839	0.193368	-0.755318	0.192033	-0.765313	LOC100505678	25.3342	9.30956	10.5285	10.4559
TBC1D8	-1.46331	0.366785	1.46331	0.366785	TBC1D8	TBC1D8	11138	TBC1 domain family, member 8 (with GRAM domain)	TBC1D8	0.257733	0.364	0.233349	-0.710096	TBC1D8	22.1308	22.1459	0.310867	15.1238	15.9395	-0.238373	TBC1D8	21.3306	0.257733	22.9611	0.364	20.9731	0.233349	10.9058	-0.710096	TBC1D8	860.405	926.171	845.983	439.903
PIF1	-1.46327	0.476016	1.46327	0.476016	PIF1	PIF1	80119	PIF1 5'-to-3' DNA helicase homolog (S. cerevisiae)	PIF1	-0.0943989	1.02255	-0.379331	0.209102	PIF1	7.81734	8.41041	0.464078	5.34239	5.45387	-0.0851145	PIF1	5.30812	-0.0943989	11.5127	1.02255	4.3568	-0.379331	6.55094	0.209102	PIF1	133.063	288.597	109.215	164.217
ZNF407	-1.46293	0.0262565	1.46293	0.0262565	ZNF407	ZNF407	55628	zinc finger protein 407	ZNF407	0.222761	0.179261	-0.259763	-0.435939	ZNF407	1.76234	1.76254	0.201011	1.20466	1.20691	-0.347851	ZNF407	1.78911	0.222761	1.73597	0.179261	1.28051	-0.259763	1.13331	-0.435939	ZNF407	131.062	119.737	102.281	76.6348
TAF1C	-1.46268	0.221927	1.46268	0.221927	TAF1C	TAF1C	9013	TATA box binding protein (TBP)-associated factor, RNA polymerase I, C, 110kDa	TAF1C	0.498292	0.514428	0.270833	-0.355349	TAF1C	19.4466	19.4469	0.50636	13.2952	13.6095	-0.0422577	TAF1C	19.3382	0.498292	19.5557	0.514428	16.5175	0.270833	10.7015	-0.355349	TAF1C	727.342	735.82	625.82	402.084
FZD5	-1.46221	0.0650875	1.46221	0.0650875	FZD5	FZD5	7855	frizzled family receptor 5	FZD5	0.0127481	0.305496	-0.374157	-0.403901	FZD5	2.756	2.7702	0.159122	1.88482	1.88492	-0.389029	FZD5	2.4901	0.0127481	3.0503	0.305496	1.90435	-0.374157	1.86549	-0.403901	FZD5	162.076	198.538	123.95	121.421
ANP32C	-1.46216	0.537087	1.46216	0.537087	ANP32C	ANP32C	23520	acidic (leucine-rich) nuclear phosphoprotein 32 family, member C	ANP32C	-0.0840763	0.640477	0.377791	-0.917586	ANP32C	9.8573	10.1697	0.278201	6.74162	7.4325	-0.269897	ANP32C	7.66835	-0.0840763	12.6711	0.640477	10.5618	0.377791	4.30319	-0.917586	ANP32C	39.0183	64.4738	53.7407	21.8956
CCDC120	-1.46201	0.132413	1.46201	0.132413	CCDC120	CCDC120	90060	coiled-coil domain containing 120	CCDC120	0.885054	1.32917	0.562711	0.555599	CCDC120	2.98628	3.02173	1.10711	2.04258	2.04258	0.559155	CCDC120	2.56026	0.885054	3.48319	1.32917	2.04762	0.562711	2.03755	0.555599	CCDC120	100.047	136.111	79.7443	79.6205
MAFG	-1.46183	0.302081	1.46183	0.302081	MAFG	MAFG	4097	v-maf musculoaponeurotic fibrosarcoma oncogene homolog G (avian)	MAFG	0.396259	0.194361	0.131969	-0.636908	MAFG	15.2821	15.3195	0.29531	10.454	10.8274	-0.252469	MAFG	16.3897	0.396259	14.2493	0.194361	13.6462	0.131969	8.0086	-0.636908	MAFG	812.382	705.118	676.96	397.107
LOC100506730	-1.46162	0.249524	1.46162	0.249524	LOC100506730	LOC100506730	100506730	uncharacterized LOC100506730	LOC100506730	0.506129	-0.0986194	-0.186228	-0.501407	LOC100506730	0.486061	0.496776	0.203755	0.332549	0.334535	-0.343817	LOC100506730	0.599397	0.506129	0.394155	-0.0986194	0.370932	-0.186228	0.298137	-0.501407	LOC100506730	14.0066	9.21054	8.66786	6.9668
PRRC2B	-1.4613	0.093478	1.4613	0.093478	PRRC2B	PRRC2B	84726	proline-rich coiled-coil 2B	PRRC2B	-0.12157	0.150119	-0.414572	-0.651393	PRRC2B	7.68646	7.72056	0.0142745	5.26	5.27773	-0.532983	PRRC2B	6.99573	-0.12157	8.44539	0.150119	5.70993	-0.414572	4.84552	-0.651393	PRRC2B	777.365	938.451	634.487	538.434
ABI2	-1.46063	0.184072	1.46063	0.184072	ABI2	ABI2	10152	abl-interactor 2	ABI2	-0.124033	0.39479	-0.323413	-0.499019	ABI2	21.3117	21.6572	0.135378	14.5907	14.6177	-0.411216	ABI2	17.8044	-0.124033	25.5099	0.39479	15.5063	-0.323413	13.7292	-0.499019	ABI2	1143.54	1638.45	995.937	881.797
LIPT1	-1.45972	0.290909	1.45972	0.290909	LIPT1	LIPT1	51601	lipoyltransferase 1	LIPT1	-0.108125	0.624519	-0.173323	-0.401674	LIPT1	14.8785	15.3607	0.258197	10.1927	10.2246	-0.287499	LIPT1	11.5421	-0.108125	19.1793	0.624519	11.0321	-0.173323	9.41711	-0.401674	LIPT1	138.065	238.451	130.018	115.45
GSTO2	-1.45893	0.604681	1.45893	0.604681	GSTO2	GSTO2	119391	glutathione S-transferase omega 2	GSTO2	0.260702	0.679999	-0.944944	0.795832	GSTO2	1.25057	1.2638	0.470351	0.857187	1.01798	-0.0745562	GSTO2	1.08143	0.260702	1.44617	0.679999	0.468881	-0.944944	1.56707	0.795832	GSTO2	10.0047	11.2573	4.33393	10.9478
CRIPAK	-1.45796	0.596965	1.45796	0.596965	CRIPAK	CRIPAK	285464	cysteine-rich PAK1 inhibitor	CRIPAK	-0.422426	0.437418	0.223795	-1.2967	CRIPAK	0.963426	1.00652	0.00749604	0.660806	0.754698	-0.536451	CRIPAK	0.715153	-0.422426	1.29789	0.437418	1.11926	0.223795	0.390137	-1.2967	CRIPAK	31.0146	56.2866	48.54	16.9194
FZD7	-1.45765	0.296225	1.45765	0.296225	FZD7	FZD7	8324	frizzled family receptor 7	FZD7	-0.153928	0.411332	-0.149047	-0.68084	FZD7	7.01377	7.14879	0.128702	4.8117	4.89365	-0.414944	FZD7	5.76596	-0.153928	8.53163	0.411332	5.7855	-0.149047	4.0018	-0.68084	FZD7	215.101	318.275	215.83	149.288
BTG3	-1.45719	0.442953	1.45719	0.442953	BTG3	BTG3	10950	BTG family, member 3	BTG3	-0.684953	0.459885	-0.640146	-0.671302	BTG3	31.626	34.1482	-0.112534	21.7034	21.7047	-0.655724	BTG3	21.2681	-0.684953	47.0283	0.459885	21.939	-0.640146	21.4703	-0.671302	BTG3	275.129	608.919	281.705	277.677
LOC100130890	-1.45691	0.197108	1.45691	0.197108	LOC100130890				LOC100130890	0.0123783	0.416508	-0.127438	-0.529497	LOC100130890	8.24301	8.32399	0.214443	5.65787	5.71289	-0.328468	LOC100130890	7.16569	0.0123783	9.48229	0.416508	6.50383	-0.127438	4.92195	-0.529497	LOC100130890	126.059	166.813	114.416	86.5873
PRPSAP2	-1.45667	0.119049	1.45667	0.119049	PRPSAP2	PRPSAP2	5636	phosphoribosyl pyrophosphate synthetase-associated protein 2	PRPSAP2	0.0477717	0.435076	-0.230645	-0.371851	PRPSAP2	32.3421	32.6339	0.241424	22.2028	22.2294	-0.301248	PRPSAP2	28.2796	0.0477717	36.9882	0.435076	23.3164	-0.230645	21.1424	-0.371851	PRPSAP2	477.224	662.135	388.32	351.326
VPS13A	-1.45602	0.106822	1.45602	0.106822	VPS13A	VPS13A	23230	vacuolar protein sorting 13 homolog A (S. cerevisiae)	VPS13A	0.171618	0.153425	-0.18675	-0.572267	VPS13A	3.89826	3.89834	0.162521	2.67734	2.70127	-0.379509	VPS13A	3.92292	0.171618	3.87376	0.153425	3.06006	-0.18675	2.34249	-0.572267	VPS13A	428.201	422.661	332.63	254.712
BRWD3	-1.45595	0.0741932	1.45595	0.0741932	BRWD3	BRWD3	254065	bromodomain and WD repeat domain containing 3	BRWD3	0.39073	0.253488	-0.0792368	-0.36047	BRWD3	0.532971	0.533574	0.322109	0.366064	0.367804	-0.219853	BRWD3	0.558934	0.39073	0.508214	0.253488	0.40354	-0.0792368	0.332068	-0.36047	BRWD3	72.0339	65.4972	52.0072	42.796
SARDH	-1.45582	0.502059	1.45582	0.502059	SARDH	SARDH	1757	sarcosine dehydrogenase	SARDH	-0.768299	0.448831	-0.97523	-0.427907	SARDH	0.544391	0.593546	-0.159734	0.37394	0.380688	-0.701568	SARDH	0.357038	-0.768299	0.830055	0.448831	0.30933	-0.97523	0.452046	-0.427907	SARDH	11.0052	25.5848	9.53465	13.9336
PMAIP1	-1.45551	0.444411	1.45551	0.444411	PMAIP1	PMAIP1	5366	phorbol-12-myristate-13-acetate-induced protein 1	PMAIP1	-0.130936	1.01514	-0.103129	-0.095724	PMAIP1	44.7485	48.3251	0.4421	30.7442	30.7443	-0.0994263	PMAIP1	30.08	-0.130936	66.5702	1.01514	30.6654	-0.103129	30.8232	-0.095724	PMAIP1	532.25	1177.93	542.608	545.401
IQSEC1	-1.45551	0.0758221	1.45551	0.0758221	IQSEC1	IQSEC1	9922	IQ motif and Sec7 domain 1	IQSEC1	0.410381	0.501719	0.0660511	-0.237002	IQSEC1	3.8772	3.87915	0.45605	2.66381	2.67851	-0.0854754	IQSEC1	3.75639	0.410381	4.0019	0.501719	2.95881	0.0660511	2.39822	-0.237002	IQSEC1	233.11	240.497	188.959	155.26
LIMK1	-1.4549	0.259573	1.4549	0.259573	LIMK1	LIMK1	3984	LIM domain kinase 1	LIMK1	-0.162935	0.461409	-0.239685	-0.543672	LIMK1	5.69807	5.83199	0.149237	3.91648	3.93824	-0.391678	LIMK1	4.58939	-0.162935	7.07459	0.461409	4.35162	-0.239685	3.52486	-0.543672	LIMK1	143.067	216.959	137.819	113.459
MALAT1	-1.45353	0.670706	1.45353	0.670706	MALAT1	MALAT1	378938	metastasis associated lung adenocarcinoma transcript 1 (non-protein coding)	MALAT1	0.716258	-0.416867	0.546001	-1.32573	MALAT1	313.841	338.354	0.149695	215.917	262.962	-0.389864	MALAT1	464.796	0.716258	211.913	-0.416867	413.057	0.546001	112.866	-1.32573	MALAT1	40453	18443.6	35950	9823.18
SHC3	-1.45305	0.415495	1.45305	0.415495	SHC3	SHC3	53358	SHC (Src homology 2 domain containing) transforming protein 3	SHC3	0.019416	0.182157	0.084564	-0.961154	SHC3	0.573055	0.573967	0.100787	0.394381	0.420567	-0.438295	SHC3	0.541628	0.019416	0.606305	0.182157	0.566647	0.084564	0.274486	-0.961154	SHC3	53.0249	59.3568	55.4743	26.8719
MFNG	-1.45295	0.512038	1.45295	0.512038	MFNG	MFNG	4242	MFNG O-fucosylpeptide 3-beta-N-acetylglucosaminyltransferase	MFNG	0.648723	-0.416192	-0.848475	0.00303602	MFNG	0.633288	0.676911	0.116265	0.435864	0.454981	-0.42272	MFNG	0.915982	0.648723	0.43784	-0.416192	0.324478	-0.848475	0.585485	0.00303602	MFNG	18.0085	8.18714	6.0675	10.9478
TYW5	-1.45273	0.164128	1.45273	0.164128	TYW5	TYW5	129450	tRNA-yW synthesizing protein 5	TYW5	-0.120774	0.347713	-0.51317	-0.337423	TYW5	5.31817	5.38842	0.113469	3.66081	3.66761	-0.425297	TYW5	4.52114	-0.120774	6.25571	0.347713	3.44449	-0.51317	3.89072	-0.337423	TYW5	238.112	329.465	181.53	205.077
AMN1	-1.45268	0.496384	1.45268	0.496384	AMN1	AMN1	196394	antagonist of mitotic exit network 1 homolog (S. cerevisiae)	AMN1	-0.430258	0.602603	-0.0521426	-0.852953	AMN1	0.296963	0.316194	0.0861723	0.204424	0.212348	-0.452548	AMN1	0.207607	-0.430258	0.42478	0.602603	0.269815	-0.0521426	0.154881	-0.852953	AMN1	4.00188	8.18714	5.20072	2.98577
PCDH1	-1.45226	0.256768	1.45226	0.256768	PCDH1	PCDH1	5097	protocadherin 1	PCDH1	-0.378223	-0.039693	-0.44935	-1.04516	PCDH1	18.4944	18.6218	-0.208958	12.7349	13.0074	-0.747256	PCDH1	16.447	-0.378223	20.7967	-0.039693	15.6558	-0.44935	10.359	-1.04516	PCDH1	621.292	772.662	585.947	388.15
TANC1	-1.45158	0.164022	1.45158	0.164022	TANC1	TANC1	85461	tetratricopeptide repeat, ankyrin repeat and coiled-coil containing 1	TANC1	0.193538	0.596124	0.00470261	-0.290291	TANC1	11.6496	11.7632	0.394831	8.02547	8.06745	-0.142794	TANC1	10.1325	0.193538	13.3939	0.596124	8.88938	0.00470261	7.24552	-0.290291	TANC1	757.356	1000.88	663.958	541.42
ROCK1P1	-1.4513	0.491069	1.4513	0.491069	ROCK1P1	ROCK1P1	727758	Rho-associated, coiled-coil containing protein kinase 1 pseudogene 1	ROCK1P1	0.0307933	0.618689	0.358897	-0.784106	ROCK1P1	2.60626	2.66054	0.324741	1.79581	1.93857	-0.212604	ROCK1P1	2.12584	0.0307933	3.19525	0.618689	2.6687	0.358897	1.20843	-0.784106	ROCK1P1	49.023	73.6843	61.5418	27.8672
ZBTB43	-1.45092	0.27249	1.45092	0.27249	ZBTB43	ZBTB43	23099	zinc finger and BTB domain containing 43	ZBTB43	-0.124493	0.353461	-0.155817	-0.689143	ZBTB43	4.48088	4.5425	0.114484	3.08831	3.14122	-0.42248	ZBTB43	3.79686	-0.124493	5.28814	0.353461	3.71531	-0.155817	2.56713	-0.689143	ZBTB43	224.105	312.135	219.297	148.293
SERPINA3	-1.45051	0.593339	1.45051	0.593339	SERPINA3	SERPINA3	12	serpin peptidase inhibitor, clade A (alpha-1 antiproteinase, antitrypsin), member 3	SERPINA3	-0.133059	1.0151	0.534481	-0.725556	SERPINA3	0.631505	0.682165	0.441021	0.435368	0.477545	-0.0955373	SERPINA3	0.424191	-0.133059	0.940139	1.0151	0.673769	0.534481	0.281321	-0.725556	SERPINA3	6.00282	13.3041	9.53465	3.98103
STX17	-1.44619	0.0403603	1.44619	0.0403603	STX17	STX17	55014	syntaxin 17	STX17	0.200265	0.382331	-0.17868	-0.303232	STX17	9.39658	9.41529	0.291298	6.49749	6.50354	-0.240956	STX17	8.82198	0.200265	10.0086	0.382331	6.7841	-0.17868	6.22298	-0.303232	STX17	605.285	686.697	465.464	426.965
FAM65A	-1.44618	0.39242	1.44618	0.39242	FAM65A	FAM65A	79567	family with sequence similarity 65, member A	FAM65A	-0.194157	0.769122	-0.144364	-0.345173	FAM65A	10.3229	10.9035	0.287482	7.138	7.15529	-0.244768	FAM65A	7.39285	-0.194157	14.4141	0.769122	7.65246	-0.144364	6.65812	-0.345173	FAM65A	296.139	579.24	306.842	267.724
C11orf95	-1.44585	0.563515	1.44585	0.563515	C11orf95	C11orf95	65998	chromosome 11 open reading frame 95	C11orf95	0.342461	-0.257124	0.225731	-1.20423	C11orf95	1.37349	1.40325	0.0426685	0.949952	1.06902	-0.48925	C11orf95	1.69072	0.342461	1.11578	-0.257124	1.55931	0.225731	0.578723	-1.20423	C11orf95	93.0437	61.4036	85.8118	31.8482
MCF2L	-1.4449	0.590154	1.4449	0.590154	MCF2L	MCF2L	23263	MCF.2 cell line derived transforming sequence-like	MCF2L	0.867355	-0.115747	0.520565	-0.830889	MCF2L	2.05923	2.17992	0.375804	1.42518	1.58438	-0.155162	MCF2L	2.89519	0.867355	1.46465	-0.115747	2.27658	0.520565	0.892185	-0.830889	MCF2L	184.087	93.1288	144.753	56.7296
C20orf194	-1.44488	0.294489	1.44488	0.294489	C20orf194	C20orf194	25943	chromosome 20 open reading frame 194	C20orf194	0.52936	0.188754	0.164599	-0.508391	C20orf194	5.00112	5.036	0.359057	3.46126	3.55584	-0.171896	C20orf194	5.62773	0.52936	4.44427	0.188754	4.37048	0.164599	2.74119	-0.508391	C20orf194	386.182	304.971	299.908	188.103
LCA5L	-1.44473	0.0454472	1.44473	0.0454472	LCA5L	LCA5L	150082	Leber congenital amaurosis 5-like	LCA5L	0.143653	0.37427	-0.292766	-0.250918	LCA5L	1.66896	1.6743	0.258961	1.1552	1.15532	-0.271842	LCA5L	1.54076	0.143653	1.80783	0.37427	1.13857	-0.292766	1.17208	-0.250918	LCA5L	34.016	39.9123	25.1368	25.8767
PEX5	-1.44468	0.209421	1.44468	0.209421	PEX5	PEX5	5830	peroxisomal biogenesis factor 5	PEX5	-0.270909	0.232949	-0.404696	-0.694767	PEX5	17.7321	18.0031	-0.0189802	12.274	12.3361	-0.549732	PEX5	14.8909	-0.270909	21.1153	0.232949	13.5721	-0.404696	11.1001	-0.694767	PEX5	457.215	640.644	411.723	340.378
ARSD	-1.44417	0.3902	1.44417	0.3902	ARSD	ARSD	414	arylsulfatase D	ARSD	0.482425	0.204388	0.28022	-0.653881	ARSD	21.7217	21.8226	0.343407	15.041	15.8361	-0.186831	ARSD	23.919	0.482425	19.7263	0.204388	20.7909	0.28022	10.8813	-0.653881	ARSD	1218.57	1004.97	1059.21	554.358
KIAA0355	-1.44414	0.202348	1.44414	0.202348	KIAA0355	KIAA0355	9710	KIAA0355	KIAA0355	0.190223	0.241714	-0.0319331	-0.596547	KIAA0355	5.85223	5.85316	0.215969	4.0524	4.13023	-0.31424	KIAA0355	5.74872	0.190223	5.9576	0.241714	4.92828	-0.0319331	3.33219	-0.596547	KIAA0355	381.179	395.03	326.778	220.947
SEC14L1	-1.44346	0.282514	1.44346	0.282514	SEC14L1	SEC14L1	6397	SEC14-like 1 (S. cerevisiae)	SEC14L1	-0.036099	0.65148	-0.103707	-0.339965	SEC14L1	48.425	49.8064	0.307691	33.548	33.6605	-0.221836	SEC14L1	38.1574	-0.036099	61.4555	0.65148	36.4105	-0.103707	30.9105	-0.339965	SEC14L1	2052.2	3217.99	1978.65	1574.13
LOC144486	-1.44333	0.304416	1.44333	0.304416	LOC144486	LOC144486	144486	uncharacterized LOC144486	LOC144486	0.314849	0.917845	-0.155115	0.329008	LOC144486	3.37025	3.44411	0.616347	2.33505	2.368	0.0869467	LOC144486	2.73465	0.314849	4.15357	0.917845	1.97437	-0.155115	2.76162	0.329008	LOC144486	66.031	100.293	47.6732	66.6822
LOC285359	-1.44277	0.449935	1.44277	0.449935	LOC285359	LOC285359	285359	phosducin-like 3 pseudogene	LOC285359	-0.38071	0.729975	-0.472165	-0.236245	LOC285359	6.67002	7.17032	0.174633	4.62308	4.63854	-0.354205	LOC285359	4.53892	-0.38071	9.80171	0.729975	4.26012	-0.472165	5.01696	-0.236245	LOC285359	36.0169	77.7779	33.8047	39.8103
C14orf28	-1.44216	0.282191	1.44216	0.282191	C14orf28	C14orf28	122525	chromosome 14 open reading frame 28	C14orf28	-0.271793	0.259696	-0.288036	-0.780526	C14orf28	4.00535	4.0735	-0.00604814	2.77733	2.81788	-0.534281	C14orf28	3.33153	-0.271793	4.81546	0.259696	3.29423	-0.288036	2.34153	-0.780526	C14orf28	92.0433	133.041	91.0125	64.6917
ZEB1-AS1	-1.44204	0.388874	1.44204	0.388874	ZEB1-AS1	ZEB1-AS1	220930	ZEB1 antisense RNA 1	ZEB1-AS1	0.0389382	0.449047	0.153933	-0.722162	ZEB1-AS1	11.4591	11.575	0.243993	7.94644	8.31556	-0.284114	ZEB1-AS1	9.9408	0.0389382	13.2092	0.449047	10.7656	0.153933	5.86553	-0.722162	ZEB1-AS1	204.096	271.199	221.03	120.426
TRIM52	-1.44139	0.532122	1.44139	0.532122	TRIM52	TRIM52	84851	tripartite motif containing 52	TRIM52	0.512748	0.0173291	0.397114	-0.92196	TRIM52	8.10661	8.2264	0.265038	5.62416	6.22216	-0.262423	TRIM52	9.62514	0.512748	6.82765	0.0173291	8.88378	0.397114	3.56055	-0.92196	TRIM52	199.094	141.228	183.759	73.649
LOC641367	-1.44118	0.63297	1.44118	0.63297	LOC641367	LOC641367	641367	cyclin Y-like 1 pseudogene	LOC641367	-0.903696	0.713949	-1.11063	-0.133627	LOC641367	0.481922	0.559663	-0.0948738	0.334393	0.353747	-0.622128	LOC641367	0.275104	-0.903696	0.844222	0.713949	0.238344	-1.11063	0.469149	-0.133627	LOC641367	7.00329	21.4913	6.0675	11.9431
LOC100506012	-1.44118	0.62953	1.44118	0.62953	LOC100506012				LOC100506012	-0.426142	0.828931	0.366926	-1.01864	LOC100506012	0.438391	0.480521	0.201395	0.304189	0.33994	-0.325858	LOC100506012	0.283762	-0.426142	0.677281	0.828931	0.49169	0.366926	0.188189	-1.01864	LOC100506012	3.00141	7.16375	5.20072	1.99051
SLC25A41	-1.44118	0.32135	1.44118	0.32135	SLC25A41	SLC25A41	284427	solute carrier family 25, member 41	SLC25A41	-0.250632	-0.440344	-1.26492	-0.480563	SLC25A41	0.476856	0.477888	-0.345488	0.330879	0.34318	-0.872739	SLC25A41	0.509263	-0.250632	0.446512	-0.440344	0.252123	-1.26492	0.434236	-0.480563	SLC25A41	7.00329	6.14036	3.46714	5.97154
LOC100302401	-1.44118	0.479002	1.44118	0.479002	LOC100302401				LOC100302401	0.593488	0.111596	0.386559	-0.735977	LOC100302401	0.388143	0.393569	0.352542	0.269323	0.289963	-0.174709	LOC100302401	0.458695	0.593488	0.328443	0.111596	0.397404	0.386559	0.182522	-0.735977	LOC100302401	10.0047	7.16375	8.66786	3.98103
FRYL	-1.44093	0.265869	1.44093	0.265869	FRYL	FRYL	285527	FRY-like	FRYL	-0.224875	0.461363	-0.376153	-0.441356	FRYL	1.91852	1.97304	0.118244	1.33145	1.33179	-0.408755	FRYL	1.51244	-0.224875	2.43364	0.461363	1.36188	-0.376153	1.3017	-0.441356	FRYL	178.084	286.55	160.355	153.27
LOC90784	-1.44086	0.317659	1.44086	0.317659	LOC90784	LOC90784	90784	uncharacterized LOC90784	LOC90784	0.480767	0.123496	-0.581781	0.132186	LOC90784	0.952172	0.95948	0.302131	0.660836	0.68117	-0.224797	LOC90784	1.07768	0.480767	0.84128	0.123496	0.515978	-0.581781	0.846363	0.132186	LOC90784	38.0179	29.6784	18.2025	29.8577
ZNF280C	-1.44085	0.396921	1.44085	0.396921	ZNF280C	ZNF280C	55609	zinc finger protein 280C	ZNF280C	0.037317	0.94585	-0.226397	0.155732	ZNF280C	8.5021	8.92706	0.491583	5.90077	5.95259	-0.0353326	ZNF280C	6.20552	0.037317	11.6486	0.94585	5.16883	-0.226397	6.73635	0.155732	ZNF280C	285.134	535.235	237.499	309.525
GCFC1-AS1	-1.44034	0.522439	1.44034	0.522439	GCFC1-AS1	GCFC1-AS1	100506215	GCFC1 antisense RNA 1	GCFC1-AS1	-0.254344	0.373208	0.141718	-1.07568	GCFC1-AS1	0.683924	0.700164	0.0594319	0.474835	0.517729	-0.466979	GCFC1-AS1	0.55024	-0.254344	0.850088	0.373208	0.724067	0.141718	0.311391	-1.07568	GCFC1-AS1	18.0085	26.6082	20.8029	9.95257
TANC2	-1.43941	0.0785517	1.43941	0.0785517	TANC2	TANC2	26115	tetratricopeptide repeat, ankyrin repeat and coiled-coil containing 2	TANC2	0.0424626	0.232685	-0.512388	-0.263419	TANC2	1.64595	1.64953	0.137574	1.14349	1.14775	-0.387904	TANC2	1.54094	0.0424626	1.75812	0.232685	1.04896	-0.512388	1.24654	-0.263419	TANC2	182.086	207.749	123.95	147.298
AOC2	-1.43937	0.415767	1.43937	0.415767	AOC2	AOC2	314	amine oxidase, copper containing 2 (retina-specific)	AOC2	-0.318993	0.683084	-0.467252	-0.219525	AOC2	1.35084	1.43312	0.182046	0.938495	0.941956	-0.343389	AOC2	0.9545	-0.318993	1.91175	0.683084	0.861282	-0.467252	1.02263	-0.219525	AOC2	24.0113	48.0995	21.6697	24.8814
EPB41L5	-1.43895	0.517237	1.43895	0.517237	EPB41L5	EPB41L5	57669	erythrocyte membrane protein band 4.1 like 5	EPB41L5	-0.550689	0.784936	-0.320939	-0.49485	EPB41L5	28.9321	32.0874	0.117123	20.1064	20.1429	-0.407894	EPB41L5	18.2116	-0.550689	45.9633	0.784936	21.3555	-0.320939	18.9303	-0.49485	EPB41L5	1098.52	2627.05	1284.58	1035.07
MARCH7	-1.43895	0.303941	1.43895	0.303941	MARCH7				MARCH7	-0.261308	0.46434	-0.301029	-0.545972	MARCH7	70.5645	72.8077	0.101516	49.0388	49.2156	-0.423501	MARCH7	54.8738	-0.261308	90.7417	0.46434	53.3836	-0.301029	45.0477	-0.545972	MARCH7	1831.86	3029.24	1782.11	1503.83
ZNF708	-1.43877	0.128325	1.43877	0.128325	ZNF708	ZNF708	7562	zinc finger protein 708	ZNF708	0.136037	-0.230556	-0.671795	-0.472403	ZNF708	2.06322	2.07989	-0.0472593	1.43401	1.43744	-0.572099	ZNF708	2.34273	0.136037	1.81705	-0.230556	1.33826	-0.671795	1.53661	-0.472403	ZNF708	91.0428	70.6141	52.0072	59.7154
FAM177A1	-1.43861	0.279691	1.43861	0.279691	FAM177A1	FAM177A1	283635	family with sequence similarity 177, member A1	FAM177A1	-0.289065	0.424364	-0.477	-0.437055	FAM177A1	24.8096	25.5718	0.0676492	17.2455	17.2472	-0.457027	FAM177A1	19.3748	-0.289065	31.7688	0.424364	17.0084	-0.477	17.4859	-0.437055	FAM177A1	539.254	884.212	474.132	486.68
DOK6	-1.43812	0.120828	1.43812	0.120828	DOK6	DOK6	220164	docking protein 6	DOK6	0.391288	-0.0104317	-0.330226	-0.337281	DOK6	1.46754	1.48179	0.190428	1.02046	1.02046	-0.333753	DOK6	1.68677	0.391288	1.27681	-0.0104317	1.02296	-0.330226	1.01797	-0.337281	DOK6	150.071	113.597	91.0125	90.5684
GPR63	-1.43764	0.608165	1.43764	0.608165	GPR63	GPR63	81491	G protein-coupled receptor 63	GPR63	-0.880905	0.850797	-0.45922	-0.618283	GPR63	0.999295	1.18473	-0.0150538	0.695097	0.696153	-0.538752	GPR63	0.548336	-0.880905	1.82113	0.850797	0.734491	-0.45922	0.657815	-0.618283	GPR63	33.0155	107.456	43.3393	38.815
SLC16A9	-1.4375	0.394489	1.4375	0.394489	SLC16A9	SLC16A9	220963	solute carrier family 16, member 9 (monocarboxylic acid transporter 9)	SLC16A9	-0.399705	0.568847	-0.486342	-0.391649	SLC16A9	3.32725	3.51647	0.084571	2.3146	2.31584	-0.438995	SLC16A9	2.3785	-0.399705	4.65443	0.568847	2.23987	-0.486342	2.39182	-0.391649	SLC16A9	92.0433	180.117	86.6786	92.5589
CACNB1	-1.43734	0.0368091	1.43734	0.0368091	CACNB1	CACNB1	782	calcium channel, voltage-dependent, beta 1 subunit	CACNB1	0.203693	0.128087	-0.453632	-0.261382	CACNB1	3.49806	3.49926	0.16589	2.43371	2.43912	-0.357507	CACNB1	3.59093	0.203693	3.40759	0.128087	2.27684	-0.453632	2.60139	-0.261382	CACNB1	123.058	114.62	71.9432	86.5873
NBPF14	-1.43721	0.265712	1.43721	0.265712	NBPF14	NBPF14	25832	neuroblastoma breakpoint family, member 14	NBPF14	-0.0193577	0.357279	-0.0687473	-0.639874	NBPF14	0.831481	0.838575	0.16896	0.578538	0.589908	-0.35431	NBPF14	0.729731	-0.0193577	0.947418	0.357279	0.705172	-0.0687473	0.474645	-0.639874	NBPF14	26.0122	33.772	25.1368	16.9194
ATP6V1E2	-1.43575	0.64226	1.43575	0.64226	ATP6V1E2	ATP6V1E2	90423	ATPase, H+ transporting, lysosomal 31kDa, V1 subunit E2	ATP6V1E2	0.106039	0.598154	-1.10089	0.761472	ATP6V1E2	1.57026	1.59316	0.352097	1.09369	1.32952	-0.169709	ATP6V1E2	1.32404	0.106039	1.86227	0.598154	0.573561	-1.10089	2.08548	0.761472	ATP6V1E2	24.0113	33.772	10.4014	37.8198
MAFF	-1.43557	0.419039	1.43557	0.419039	MAFF	MAFF	23764	v-maf musculoaponeurotic fibrosarcoma oncogene homolog F (avian)	MAFF	0.507072	-0.29521	-0.0899333	-0.741454	MAFF	7.79311	8.0963	0.105931	5.42858	5.56755	-0.415694	MAFF	10.2912	0.507072	5.9014	-0.29521	6.80377	-0.0899333	4.33134	-0.741454	MAFF	214.101	125.877	148.22	94.5494
CRAT	-1.43513	0.4195	1.43513	0.4195	CRAT	CRAT	1384	carnitine O-acetyltransferase	CRAT	-0.323563	0.501876	-0.120764	-0.743282	CRAT	37.8	39.3573	0.0891568	26.3391	26.9545	-0.432023	CRAT	28.3956	-0.323563	50.3191	0.501876	32.6813	-0.120764	21.2277	-0.743282	CRAT	748.352	1321.2	859.852	560.329
LOC100131096	-1.43495	0.537537	1.43495	0.537537	LOC100131096	LOC100131096	100131096	uncharacterized LOC100131096	LOC100131096	-0.425507	0.615998	0.0514031	-0.902906	LOC100131096	2.27492	2.42474	0.0952453	1.58537	1.67287	-0.425752	LOC100131096	1.58564	-0.425507	3.26384	0.615998	2.20683	0.0514031	1.13892	-0.902906	LOC100131096	48.3871	99.5985	67.3432	34.7551
ADSSL1	-1.43472	0.409695	1.43472	0.409695	ADSSL1	ADSSL1	122622	adenylosuccinate synthase like 1	ADSSL1	0.114697	0.0380315	0.0576629	-0.946482	ADSSL1	8.42568	8.42865	0.0763645	5.87268	6.23191	-0.444409	ADSSL1	8.65255	0.114697	8.20475	0.0380315	8.31716	0.0576629	4.14665	-0.946482	ADSSL1	137.064	129.971	131.751	65.6869
CDKL5	-1.43354	0.36852	1.43354	0.36852	CDKL5	CDKL5	6792	cyclin-dependent kinase-like 5	CDKL5	-0.487073	0.17364	-0.98351	-0.369081	CDKL5	0.419512	0.430559	-0.156716	0.292641	0.299301	-0.676296	CDKL5	0.333655	-0.487073	0.527463	0.17364	0.236513	-0.98351	0.36209	-0.369081	CDKL5	11.0052	17.3977	7.80107	11.9431
NEK8	-1.4334	0.0199906	1.4334	0.0199906	NEK8	NEK8	284086	NIMA (never in mitosis gene a)- related kinase 8	NEK8	0.224437	0.296288	-0.324414	-0.193735	NEK8	4.11997	4.12125	0.260362	2.87427	2.87722	-0.259074	NEK8	4.01864	0.224437	4.22385	0.296288	2.747	-0.324414	3.00744	-0.193735	NEK8	109.051	114.62	74.5436	81.611
SNX16	-1.43333	0.128475	1.43333	0.128475	SNX16	SNX16	64089	sorting nexin 16	SNX16	-0.0786472	0.297934	-0.494834	-0.324628	SNX16	14.4995	14.6232	0.109643	10.1159	10.1335	-0.409731	SNX16	12.7254	-0.0786472	16.5209	0.297934	9.53645	-0.494834	10.7306	-0.324628	SNX16	393.185	508.626	295.574	333.411
AKT2	-1.43289	0.597061	1.43289	0.597061	AKT2	AKT2	208	v-akt murine thymoma viral oncogene homolog 2	AKT2	0.459849	-0.113599	0.436782	-1.12839	AKT2	4.86011	4.95641	0.173125	3.39182	3.9032	-0.345806	AKT2	5.92869	0.459849	3.98413	-0.113599	5.83465	0.436782	1.97174	-1.12839	AKT2	309.145	207.749	304.242	102.511
RNF207	-1.43122	0.652063	1.43122	0.652063	RNF207	RNF207	388591	ring finger protein 207	RNF207	0.701881	-0.412276	0.440508	-1.18539	RNF207	4.61079	4.95883	0.144802	3.22158	3.74673	-0.372442	RNF207	6.7838	0.701881	3.13385	-0.412276	5.65968	0.440508	1.83378	-1.18539	RNF207	261.408	120.76	218.091	70.6632
ZNF329	-1.4308	0.662275	1.4308	0.662275	ZNF329	ZNF329	79673	zinc finger protein 329	ZNF329	1.01892	-0.599162	0.311788	-0.925678	ZNF329	2.73162	3.17252	0.209881	1.90915	2.08744	-0.306945	ZNF329	4.78593	1.01892	1.5591	-0.599162	2.93155	0.311788	1.24332	-0.925678	ZNF329	157.074	51.1697	96.2133	40.8055
SNORA81	-1.43058	0.82994	1.43058	0.82994	SNORA81	SNORA81	677847	small nucleolar RNA, H/ACA box 81	SNORA81	1.83577	-1.18056	1.29627	-1.67426	SNORA81	74.8688	119.642	0.327605	52.3345	82.6065	-0.188998	SNORA81	212.963	1.83577	26.3207	-1.18056	146.52	1.29627	18.693	-1.67426	SNORA81	34.016	4.20413	23.4032	2.98577
ZNF264	-1.43013	0.25829	1.43013	0.25829	ZNF264	ZNF264	9422	zinc finger protein 264	ZNF264	0.458215	-0.195443	-0.33884	-0.430678	ZNF264	0.912168	0.935675	0.131386	0.637822	0.638146	-0.384759	ZNF264	1.14409	0.458215	0.72726	-0.195443	0.65845	-0.33884	0.617841	-0.430678	ZNF264	140.066	89.0352	80.6111	75.6395
ULK2	-1.42977	0.375351	1.42977	0.375351	ULK2	ULK2	9706	unc-51-like kinase 2 (C. elegans)	ULK2	0.184344	0.23352	0.148434	-0.762128	ULK2	16.0497	16.0521	0.208932	11.2254	11.789	-0.306847	ULK2	15.7785	0.184344	16.3256	0.23352	15.3906	0.148434	8.18746	-0.762128	ULK2	787.37	804.387	736.768	429.951
RAB5C	-1.42877	0.461655	1.42877	0.461655	RAB5C	RAB5C	5878	RAB5C, member RAS oncogene family	RAB5C	-0.123199	0.47661	0.146426	-0.822559	RAB5C	71.7732	73.3295	0.176705	50.2343	53.0937	-0.338067	RAB5C	58.3018	-0.123199	88.3573	0.47661	70.2825	0.146426	35.9049	-0.822559	RAB5C	890.419	1350.88	1073.95	550.377
DDHD2	-1.4286	0.267809	1.4286	0.267809	DDHD2	DDHD2	23259	DDHD domain containing 2	DDHD2	-0.256968	0.401579	-0.36385	-0.520752	DDHD2	37.0171	37.9855	0.0723054	25.9114	25.9497	-0.442301	DDHD2	29.4633	-0.256968	46.5076	0.401579	27.3594	-0.36385	24.54	-0.520752	DDHD2	1237.58	2061.11	1216.1	1077.86
SYNE2	-1.42842	0.0623188	1.42842	0.0623188	SYNE2	SYNE2	23224	spectrin repeat containing, nuclear envelope 2	SYNE2	0.313386	0.0871855	-0.240784	-0.38748	SYNE2	4.32741	4.34072	0.200286	3.02951	3.03343	-0.314132	SYNE2	4.68031	0.313386	4.00112	0.0871855	3.18752	-0.240784	2.87934	-0.38748	SYNE2	1036.49	886.258	676.96	637.959
ZSCAN2	-1.42719	0.274931	1.42719	0.274931	ZSCAN2	ZSCAN2	54993	zinc finger and SCAN domain containing 2	ZSCAN2	0.548052	-0.0479131	-0.0899153	-0.436303	ZSCAN2	6.38662	6.52334	0.25007	4.47496	4.50725	-0.263109	ZSCAN2	7.85187	0.548052	5.19481	-0.0479131	5.04575	-0.0899153	3.96874	-0.436303	ZSCAN2	208.098	112.573	140.419	85.5921
MIS18BP1	-1.42693	0.332464	1.42693	0.332464	MIS18BP1	MIS18BP1	55320	MIS18 binding protein 1	MIS18BP1	-0.360503	0.448402	-0.477436	-0.460488	MIS18BP1	12.3115	12.7985	0.0439497	8.62796	8.62811	-0.468962	MIS18BP1	9.3016	-0.360503	16.2953	0.448402	8.57743	-0.477436	8.67879	-0.460488	MIS18BP1	435.205	762.428	401.322	406.065
POMT1	-1.42649	0.592896	1.42649	0.592896	POMT1	POMT1	10585	protein-O-mannosyltransferase 1	POMT1	-1.0708	0.547022	-0.692764	-0.855945	POMT1	0.393022	0.456436	-0.261888	0.275517	0.275958	-0.774355	POMT1	0.224342	-1.0708	0.68853	0.547022	0.291548	-0.692764	0.260368	-0.855945	POMT1	6.00282	18.4233	7.80107	6.9668
GUSBP11	-1.42648	0.379121	1.42648	0.379121	GUSBP11	GUSBP11	91316	glucuronidase, beta pseudogene 11	GUSBP11	0.435757	-0.075508	0.0470963	-0.71177	GUSBP11	6.63377	6.73818	0.180124	4.65044	4.81221	-0.332337	GUSBP11	7.91979	0.435757	5.55658	-0.075508	6.04944	0.0470963	3.57498	-0.71177	GUSBP11	260.17	182.537	198.728	117.44
MFI2-AS1	-1.4264	0.141159	1.4264	0.141159	MFI2-AS1	MFI2-AS1	100507057	MFI2 antisense RNA 1	MFI2-AS1	0.0324331	0.328147	-0.1745	-0.489676	MFI2-AS1	1.45705	1.46471	0.18029	1.02149	1.02759	-0.332088	MFI2-AS1	1.31512	0.0324331	1.6143	0.328147	1.13939	-0.1745	0.915788	-0.489676	MFI2-AS1	10.0047	12.2807	8.66786	6.9668
HCN3	-1.42636	0.407774	1.42636	0.407774	HCN3	HCN3	57657	hyperpolarization activated cyclic nucleotide-gated potassium channel 3	HCN3	0.669054	0.135662	0.304546	-0.524506	HCN3	7.09254	7.21408	0.402358	4.97248	5.17915	-0.10998	HCN3	8.53268	0.669054	5.89547	0.135662	6.62762	0.304546	3.73068	-0.524506	HCN3	306.605	211.842	238.151	134.055
DYNC1H1	-1.42613	0.234704	1.42613	0.234704	DYNC1H1	DYNC1H1	1778	dynein, cytoplasmic 1, heavy chain 1	DYNC1H1	0.032647	0.238795	-0.662977	-0.0897874	DYNC1H1	13.7736	13.8088	0.135721	9.65807	9.84926	-0.376382	DYNC1H1	12.8239	0.032647	14.7937	0.238795	7.91802	-0.662977	11.7805	-0.0897874	DYNC1H1	1855.87	2140.94	1145.89	1704.87
LOC143188	-1.42508	0.187216	1.42508	0.187216	LOC143188	LOC143188	143188	uncharacterized LOC143188	LOC143188	-0.0298098	0.350792	-0.526248	-0.174852	LOC143188	0.409019	0.412583	0.160491	0.287015	0.289146	-0.35055	LOC143188	0.358474	-0.0298098	0.466692	0.350792	0.254106	-0.526248	0.324187	-0.174852	LOC143188	11.0052	14.3275	7.80107	9.95257
DOCK4	-1.42496	0.322397	1.42496	0.322397	DOCK4	DOCK4	9732	dedicator of cytokinesis 4	DOCK4	0.766393	0.649924	0.584995	-0.190522	DOCK4	1.29297	1.29402	0.708159	0.907373	0.940345	0.197236	DOCK4	1.34623	0.766393	1.24182	0.649924	1.18717	0.584995	0.69352	-0.190522	DOCK4	112.053	103.363	98.8136	57.7249
ICA1L	-1.42476	0.284516	1.42476	0.284516	ICA1L	ICA1L	130026	islet cell autoantigen 1,69kDa-like	ICA1L	-0.225738	0.395242	-0.593132	-0.25881	ICA1L	0.886747	0.907362	0.0847517	0.622382	0.626564	-0.425971	ICA1L	0.715044	-0.225738	1.09968	0.395242	0.554289	-0.593132	0.698839	-0.25881	ICA1L	57.0268	55.2632	44.2061	55.7344
PRMT7	-1.42423	0.287007	1.42423	0.287007	PRMT7	PRMT7	54496	protein arginine methyltransferase 7	PRMT7	0.163429	0.702987	-0.307372	0.153422	PRMT7	19.2909	19.6292	0.433208	13.5448	13.7179	-0.0769747	PRMT7	16.0008	0.163429	23.2576	0.702987	11.5456	-0.307372	15.8902	0.153422	PRMT7	360.169	523.977	257.435	367.25
C14orf133	-1.42415	0.252513	1.42415	0.252513	C14orf133	VIPAS39	63894	VPS33B interacting protein, apical-basolateral polarity regulator, spe-39 homolog	C14orf133	-0.230773	0.388041	-0.347712	-0.515219	C14orf133	13.7308	14.0478	0.0786342	9.64142	9.65767	-0.431466	C14orf133	11.0804	-0.230773	17.0152	0.388041	10.2177	-0.347712	9.09764	-0.515219	C14orf133	273.128	420.615	247.901	219.952
TRAPPC10	-1.42353	0.325671	1.42353	0.325671	TRAPPC10	TRAPPC10	7109	trafficking protein particle complex 10	TRAPPC10	-0.15507	0.600606	-0.17327	-0.400143	TRAPPC10	7.79225	8.06102	0.222768	5.47389	5.49081	-0.286707	TRAPPC10	5.99684	-0.15507	10.1252	0.600606	5.92166	-0.17327	5.05997	-0.400143	TRAPPC10	415.195	701.024	409.99	350.33
NEURL3	-1.4235	0.719191	1.4235	0.719191	NEURL3	NEURL3	93082	neuralized homolog 3 (Drosophila) pseudogene	NEURL3	0.54189	-0.910853	0.300193	-1.68804	NEURL3	1.69074	1.9096	-0.184481	1.18773	1.48105	-0.693924	NEURL3	2.79728	0.54189	1.02192	-0.910853	2.3658	0.300193	0.596293	-1.68804	NEURL3	42.0198	15.3509	35.5382	8.95731
USP49	-1.42294	0.495627	1.42294	0.495627	USP49	USP49	25862	ubiquitin specific peptidase 49	USP49	0.526315	-0.265911	0.0931125	-0.850455	USP49	1.55037	1.60918	0.130202	1.08955	1.14833	-0.378671	USP49	2.04022	0.526315	1.17813	-0.265911	1.51102	0.0931125	0.785648	-0.850455	USP49	62.0292	35.8188	45.9397	23.8862
C9orf102	-1.42284	0.00459611	1.42284	0.00459611	C9orf102	ERCC6L2	375748	excision repair cross-complementing rodent repair deficiency, complementation group 6-like 2	C9orf102	0.124923	0.17581	-0.381874	-0.334944	C9orf102	9.98642	9.98797	0.150366	7.01864	7.01957	-0.358409	C9orf102	9.81184	0.124923	10.1641	0.17581	6.90541	-0.381874	7.13373	-0.334944	C9orf102	446.015	462.027	313.898	324.277
KIF13A	-1.42284	0.341882	1.42284	0.341882	KIF13A	KIF13A	63971	kinesin family member 13A	KIF13A	-0.402626	0.41249	-0.446486	-0.561187	KIF13A	4.14263	4.30903	0.00493214	2.91153	2.91383	-0.503837	KIF13A	3.12312	-0.402626	5.49494	0.41249	3.0296	-0.446486	2.79806	-0.561187	KIF13A	134.063	199.562	145.62	88.5778
ZSCAN30	-1.42271	0.305305	1.42271	0.305305	ZSCAN30	ZSCAN30	100101467	zinc finger and SCAN domain containing 30	ZSCAN30	0.719686	0.207111	0.224946	-0.315424	ZSCAN30	4.38149	4.45081	0.463398	3.07969	3.13385	-0.045239	ZSCAN30	5.23326	0.719686	3.66836	0.207111	3.71399	0.224946	2.55372	-0.315424	ZSCAN30	212.1	148.296	149.087	102.511
FANCB	-1.42267	0.411113	1.42267	0.411113	FANCB	FANCB	2187	Fanconi anemia, complementation group B	FANCB	0.0559317	0.600261	-0.592268	0.231257	FANCB	6.23636	6.34766	0.328096	4.38356	4.56332	-0.180506	FANCB	5.16418	0.0559317	7.53114	0.600261	3.29514	-0.592268	5.83149	0.231257	FANCB	148.07	215.936	94.4797	167.203
SEMA4G	-1.42216	0.71591	1.42216	0.71591	SEMA4G	SEMA4G	57715	sema domain, immunoglobulin domain (Ig), transmembrane domain (TM) and short cytoplasmic domain, (semaphorin) 4G	SEMA4G	1.34247	-0.273557	0.930447	-0.877708	SEMA4G	3.44279	3.99702	0.534456	2.42081	2.9119	0.0263696	SEMA4G	6.02763	1.34247	1.96641	-0.273557	4.53018	0.930447	1.29362	-0.877708	SEMA4G	211.713	68.9337	171.592	46.0646
L3MBTL1	-1.42176	0.419428	1.42176	0.419428	L3MBTL1	L3MBTL1	26013	l(3)mbt-like 1 (Drosophila)	L3MBTL1	0.370149	0.197316	0.272028	-0.71991	L3MBTL1	4.86669	4.87543	0.283732	3.42302	3.62729	-0.223941	L3MBTL1	5.16711	0.370149	4.58374	0.197316	4.82737	0.272028	2.42721	-0.71991	L3MBTL1	161.076	140.205	150.821	76.6348
CASP8	-1.42154	0.0259108	1.42154	0.0259108	CASP8	CASP8	841	caspase 8, apoptosis-related cysteine peptidase	CASP8	0.374287	0.329017	-0.235981	-0.0756245	CASP8	19.2189	19.2213	0.351652	13.5198	13.5406	-0.155802	CASP8	19.5228	0.374287	18.9197	0.329017	12.7889	-0.235981	14.2924	-0.0756245	CASP8	423.199	451.316	325.912	354.311
KIAA0922	-1.4212	0.163742	1.4212	0.163742	KIAA0922	KIAA0922	23240	KIAA0922	KIAA0922	0.184895	0.560694	-0.275658	0.00702139	KIAA0922	10.1782	10.2646	0.372794	7.16166	7.19606	-0.134318	KIAA0922	8.93524	0.184895	11.594	0.560694	6.49331	-0.275658	7.8988	0.00702139	KIAA0922	440.207	571.053	319.844	389.145
MYCBP2	-1.42119	0.356179	1.42119	0.356179	MYCBP2	MYCBP2	23077	MYC binding protein 2, E3 ubiquitin protein ligase	MYCBP2	0.0853774	0.0333167	-0.87311	-0.0223853	MYCBP2	1.92975	1.93006	0.059347	1.35784	1.41729	-0.447747	MYCBP2	1.96488	0.0853774	1.89524	0.0333167	1.01112	-0.87311	1.82346	-0.0223853	MYCBP2	298.14	287.573	153.421	276.681
EIF2S1	-1.42086	0.590599	1.42086	0.590599	EIF2S1	EIF2S1	1965	eukaryotic translation initiation factor 2, subunit 1 alpha, 35kDa	EIF2S1	-0.90595	0.638298	-0.84432	-0.436852	EIF2S1	47.6049	54.5871	-0.133826	33.5044	33.8391	-0.640586	EIF2S1	27.8753	-0.90595	81.2989	0.638298	29.0919	-0.84432	38.5862	-0.436852	EIF2S1	1129.53	3294.3	1178.83	1563.55
DND1	-1.42078	0.00295545	1.42078	0.00295545	DND1	DND1	373863	dead end homolog 1 (zebrafish)	DND1	0.161804	0.216101	-0.312721	-0.322735	DND1	3.89125	3.89194	0.188952	2.73882	2.73883	-0.317728	DND1	3.81871	0.161804	3.96517	0.216101	2.74834	-0.312721	2.72933	-0.322735	DND1	54.5477	56.6398	39.2583	38.9867
ABL1	-1.42069	0.1444	1.42069	0.1444	ABL1	ABL1	25	c-abl oncogene 1, non-receptor tyrosine kinase	ABL1	-0.0421033	0.358177	-0.26542	-0.431694	ABL1	13.3658	13.4947	0.158037	9.40797	9.4236	-0.348557	ABL1	11.6345	-0.0421033	15.3548	0.358177	9.96604	-0.26542	8.88115	-0.431694	ABL1	645.303	846.346	553.01	494.643
RAB39A	-1.42044	0.61025	1.42044	0.61025	RAB39A	RAB39A	54734	RAB39A, member RAS oncogene family	RAB39A	0.161736	0.111957	-1.21512	0.476127	RAB39A	2.19644	2.19677	0.136847	1.5463	1.81962	-0.369496	RAB39A	2.23466	0.161736	2.15887	0.111957	0.860472	-1.21512	2.77877	0.476127	RAB39A	36.0169	34.7954	13.8686	44.7865
ANP32AP1	-1.4204	0.493795	1.4204	0.493795	ANP32AP1	ANP32AP1	723972	acidic (leucine-rich) nuclear phosphoprotein 32 family, member A pseudogene 1	ANP32AP1	-0.033078	0.478772	0.270187	-0.837081	ANP32AP1	7.2655	7.38011	0.222847	5.11512	5.4964	-0.283447	ANP32AP1	6.08449	-0.033078	8.67574	0.478772	7.50786	0.270187	3.48494	-0.837081	ANP32AP1	33.0155	47.0761	40.7389	18.9099
FRAS1	-1.42038	0.290644	1.42038	0.290644	FRAS1	FRAS1	80144	Fraser syndrome 1	FRAS1	0.485921	0.0271665	0.0221518	-0.521619	FRAS1	0.886552	0.897781	0.256544	0.624165	0.635281	-0.249734	FRAS1	1.03933	0.485921	0.756231	0.0271665	0.753607	0.0221518	0.516956	-0.521619	FRAS1	164.077	106.433	96.2133	81.611
LOC541471	-1.41934	0.462106	1.41934	0.462106	LOC541471	LOC541471	541471	uncharacterized LOC541471	LOC541471	-0.251336	0.828587	-0.364623	-0.0685582	LOC541471	45.1906	48.3929	0.288625	31.8392	32.007	-0.21659	LOC541471	31.0816	-0.251336	65.7041	0.828587	28.7343	-0.364623	35.2797	-0.0685582	LOC541471	130.061	256.872	118.75	143.317
RGL4	-1.41933	0.600127	1.41933	0.600127	RGL4	RGL4	266747	ral guanine nucleotide dissociation stimulator-like 4	RGL4	0.658879	-0.523899	0.128638	-1.00408	RGL4	0.991971	1.07649	0.0674896	0.698901	0.753451	-0.437721	RGL4	1.4946	0.658879	0.658375	-0.523899	1.03492	0.128638	0.471981	-1.00408	RGL4	40.9714	18.0479	28.37	12.9383
GTF3C4	-1.4188	0.330476	1.4188	0.330476	GTF3C4	GTF3C4	9329	general transcription factor IIIC, polypeptide 4, 90kDa	GTF3C4	-0.300439	0.47277	-0.503807	-0.333196	GTF3C4	14.1101	14.6197	0.0861654	9.94512	9.96251	-0.418501	GTF3C4	10.7932	-0.300439	18.4463	0.47277	9.37412	-0.503807	10.5509	-0.333196	GTF3C4	404.19	690.79	351.048	395.117
NRIP1	-1.41872	0.213401	1.41872	0.213401	NRIP1	NRIP1	8204	nuclear receptor interacting protein 1	NRIP1	-0.00151006	0.196119	-0.145215	-0.669354	NRIP1	25.7431	25.8035	0.0973044	18.1453	18.4455	-0.407285	NRIP1	24.0389	-0.00151006	27.5681	0.196119	21.7598	-0.145215	15.1312	-0.669354	NRIP1	1808.85	2074.42	1637.36	1138.57
TTLL11	-1.41802	0.474853	1.41802	0.474853	TTLL11	TTLL11	158135	tubulin tyrosine ligase-like family, member 11	TTLL11	-0.136788	0.460414	0.152111	-0.836242	TTLL11	1.54851	1.5818	0.161813	1.09202	1.15671	-0.342065	TTLL11	1.259	-0.136788	1.90459	0.460414	1.53813	0.152111	0.775299	-0.836242	TTLL11	29.0136	42.9825	30.3375	15.9241
GCC2	-1.41761	0.339045	1.41761	0.339045	GCC2	GCC2	9648	GRIP and coiled-coil domain containing 2	GCC2	-0.201304	0.316801	-0.135452	-0.755965	GCC2	14.8539	15.094	0.0577485	10.4782	10.7214	-0.445708	GCC2	12.4125	-0.201304	17.7756	0.316801	12.9922	-0.135452	8.45064	-0.755965	GCC2	860.405	1232.17	900.591	585.211
SETX	-1.41752	0.0364909	1.41752	0.0364909	SETX	SETX	23064	senataxin	SETX	0.0705969	0.213666	-0.429511	-0.29297	SETX	9.55584	9.56759	0.142131	6.74123	6.74878	-0.361241	SETX	9.09358	0.0705969	10.0416	0.213666	6.42965	-0.429511	7.0679	-0.29297	SETX	1006.47	1111.4	711.631	782.272
RERE	-1.4175	0.012752	1.4175	0.012752	RERE	RERE	473	arginine-glutamic acid dipeptide (RE) repeats	RERE	0.149248	0.174386	-0.397531	-0.285535	RERE	2.46319	2.46328	0.161817	1.7377	1.73901	-0.341533	RERE	2.44182	0.149248	2.48474	0.174386	1.67154	-0.397531	1.80647	-0.285535	RERE	196.092	200.585	134.352	144.312
CMTM4	-1.41748	0.177769	1.41748	0.177769	CMTM4	CMTM4	146223	CKLF-like MARVEL transmembrane domain containing 4	CMTM4	0.315964	0.400227	0.0975012	-0.38796	CMTM4	7.77284	7.77615	0.358096	5.48357	5.56137	-0.145229	CMTM4	7.54913	0.315964	8.00318	0.400227	6.48833	0.0975012	4.63441	-0.38796	CMTM4	536.252	565.936	464.597	294.596
MAP1LC3B	-1.41723	0.407451	1.41723	0.407451	MAP1LC3B	MAP1LC3B	81631	microtubule-associated protein 1 light chain 3 beta	MAP1LC3B	0.572307	0.350564	0.429069	-0.51235	MAP1LC3B	94.4336	94.7126	0.461436	66.6324	70.2106	-0.0416401	MAP1LC3B	101.977	0.572307	87.4482	0.350564	92.3386	0.429069	48.0826	-0.51235	MAP1LC3B	2172.02	1862.58	1966.74	1024.12
PTPRM	-1.41713	0.751899	1.41713	0.751899	PTPRM	PTPRM	5797	protein tyrosine phosphatase, receptor type, M	PTPRM	1.64966	-0.565668	0.876596	-0.798544	PTPRM	0.965506	1.26433	0.541996	0.681312	0.799391	0.039026	PTPRM	2.08063	1.64966	0.448038	-0.565668	1.21753	0.876596	0.381252	-0.798544	PTPRM	114.054	24.5614	66.7425	20.9004
TBC1D13	-1.41712	0.202906	1.41712	0.202906	TBC1D13	TBC1D13	54662	TBC1 domain family, member 13	TBC1D13	-0.22026	0.314316	-0.422053	-0.489806	TBC1D13	17.9374	18.2461	0.0470281	12.6577	12.6611	-0.455929	TBC1D13	14.9038	-0.22026	21.5884	0.314316	12.9584	-0.422053	12.3639	-0.489806	TBC1D13	560.263	811.551	487.134	464.785
FOXD2	-1.41682	0.0604103	1.41682	0.0604103	FOXD2	FOXD2	2306	forkhead box D2	FOXD2	0.115497	-0.04976	-0.569481	-0.370088	FOXD2	0.805499	0.80682	0.0328683	0.568527	0.569885	-0.469785	FOXD2	0.852979	0.115497	0.760661	-0.04976	0.530566	-0.569481	0.609204	-0.370088	FOXD2	39.0183	34.7954	24.27	27.8672
PIEZO1	-1.41655	0.136283	1.41655	0.136283	PIEZO1	PIEZO1	9780	piezo-type mechanosensitive ion channel component 1	PIEZO1	-0.00506465	0.0370978	-0.280162	-0.692575	PIEZO1	5.91565	5.91629	0.0160166	4.17609	4.21882	-0.486368	PIEZO1	5.82984	-0.00506465	6.00273	0.0370978	4.81775	-0.280162	3.61989	-0.692575	PIEZO1	455.215	468.715	376.187	282.654
LINC00478	-1.41633	0.453057	1.41633	0.453057	LINC00478	LINC00478	388815	long intergenic non-protein coding RNA 478	LINC00478	0.661942	-0.041253	0.222637	-0.606267	LINC00478	1.64239	1.69141	0.310345	1.15961	1.20779	-0.191815	LINC00478	2.09565	0.661942	1.28717	-0.041253	1.54552	0.222637	0.870061	-0.606267	LINC00478	67.0315	40.9357	49.4068	27.8672
BCL2	-1.41586	0.216141	1.41586	0.216141	BCL2	BCL2	596	B-cell CLL/lymphoma 2	BCL2	-0.13758	-0.0453083	-0.315927	-0.870322	BCL2	0.504197	0.504455	-0.0914444	0.356106	0.3627	-0.593124	BCL2	0.488328	-0.13758	0.520581	-0.0453083	0.431543	-0.315927	0.293856	-0.870322	BCL2	16.0075	10.2339	27.7372	18.9099
RABGAP1	-1.4158	0.206642	1.4158	0.206642	RABGAP1	RABGAP1	23637	RAB GTPase activating protein 1	RABGAP1	0.0639017	0.327969	-0.0676882	-0.543669	RABGAP1	20.4247	20.5102	0.195935	14.4263	14.623	-0.305679	RABGAP1	18.6384	0.0639017	22.3821	0.327969	17.0136	-0.0676882	12.2324	-0.543669	RABGAP1	914.43	1098.1	834.715	600.14
CUL7	-1.41542	0.448888	1.41542	0.448888	CUL7	CUL7	9820	cullin 7	CUL7	0.269198	-0.0700519	0.107456	-0.910763	CUL7	12.3551	12.4406	0.0995729	8.72895	9.27812	-0.401654	CUL7	13.8966	0.269198	10.9846	-0.0700519	12.4228	0.107456	6.13345	-0.910763	CUL7	753.354	595.615	673.493	332.416
LRRC37A3	-1.41527	0.0870482	1.41527	0.0870482	LRRC37A3	LRRC37A3	374819	leucine rich repeat containing 37, member A3	LRRC37A3	0.529394	0.64407	-0.0619651	0.233284	LRRC37A3	3.18559	3.18811	0.586732	2.25088	2.26268	0.0856596	LRRC37A3	3.06147	0.529394	3.31475	0.64407	2.03195	-0.0619651	2.4934	0.233284	LRRC37A3	171.08	185.234	113.549	139.336
EPM2AIP1	-1.41239	0.209368	1.41239	0.209368	EPM2AIP1	EPM2AIP1	9852	EPM2A (laforin) interacting protein 1	EPM2AIP1	0.233825	0.637085	0.121046	-0.246408	EPM2AIP1	8.064	8.14288	0.435455	5.70948	5.75584	-0.062681	EPM2AIP1	7.01219	0.233825	9.27357	0.637085	6.48491	0.121046	5.02677	-0.246408	EPM2AIP1	519.244	686.697	480.199	372.226
TNKS	-1.41195	0.0647122	1.41195	0.0647122	TNKS	TNKS	8658	tankyrase, TRF1-interacting ankyrin-related ADP-ribose polymerase	TNKS	-0.148174	0.0521245	-0.45796	-0.633472	TNKS	10.0472	10.0714	-0.0480246	7.1158	7.12896	-0.545716	TNKS	9.37337	-0.148174	10.7694	0.0521245	7.56207	-0.45796	6.69586	-0.633472	TNKS	901.424	1035.67	727.234	643.931
EPN2	-1.41185	0.253224	1.41185	0.253224	EPN2	EPN2	22905	epsin 2	EPN2	-0.00502757	0.565005	-0.0873857	-0.347801	EPN2	11.7621	11.9924	0.279989	8.331	8.36495	-0.217593	EPN2	9.65352	-0.00502757	14.3312	0.565005	9.11787	-0.0873857	7.61203	-0.347801	EPN2	441.207	653.948	416.057	347.345
C1orf172	-1.41171	0.53358	1.41171	0.53358	C1orf172	C1orf172	126695	chromosome 1 open reading frame 172	C1orf172	0.826468	-0.394606	-0.012725	-0.550301	C1orf172	1.24372	1.35676	0.215931	0.881004	0.896339	-0.281513	C1orf172	1.89895	0.826468	0.81458	-0.394606	1.06143	-0.012725	0.731248	-0.550301	C1orf172	31.0146	13.3041	17.3357	11.9431
ZNF75A	-1.41152	0.236996	1.41152	0.236996	ZNF75A	ZNF75A	7627	zinc finger protein 75a	ZNF75A	-0.190653	0.286331	-0.627878	-0.270946	ZNF75A	3.66973	3.71999	0.0478389	2.59984	2.61976	-0.449412	ZNF75A	3.11058	-0.190653	4.3294	0.286331	2.29733	-0.627878	2.94219	-0.270946	ZNF75A	61.0287	84.9416	45.0729	57.7249
GTF3C5	-1.41104	0.426889	1.41104	0.426889	GTF3C5	GTF3C5	9328	general transcription factor IIIC, polypeptide 5, 63kDa	GTF3C5	-0.392242	0.607948	-0.435496	-0.342315	GTF3C5	35.3572	37.5029	0.107853	25.0576	25.0706	-0.388906	GTF3C5	24.9997	-0.392242	50.006	0.607948	24.2613	-0.435496	25.88	-0.342315	GTF3C5	566.266	1132.9	549.542	586.206
LOC155060	-1.41099	0.678587	1.41099	0.678587	LOC155060	LOC155060	155060	AI894139 pseudogene	LOC155060	0.970554	-0.557065	0.408143	-0.988075	LOC155060	3.39847	3.88599	0.206745	2.40856	2.6961	-0.289966	LOC155060	5.77049	0.970554	2.00149	-0.557065	3.9076	0.408143	1.48459	-0.988075	LOC155060	174.082	60.3802	117.883	44.7865
ZNF609	-1.41082	0.237808	1.41082	0.237808	ZNF609	ZNF609	23060	zinc finger protein 609	ZNF609	0.157133	0.71124	-0.172655	0.0479524	ZNF609	2.06947	2.10775	0.434186	1.46685	1.47114	-0.0623515	ZNF609	1.70788	0.157133	2.50761	0.71124	1.35888	-0.172655	1.5834	0.0479524	ZNF609	147.069	215.936	117.016	136.35
TUBE1	-1.41049	0.342624	1.41049	0.342624	TUBE1	TUBE1	51175	tubulin, epsilon 1	TUBE1	-0.25014	0.552495	-0.318378	-0.371656	TUBE1	54.4808	56.6022	0.151178	38.6255	38.632	-0.345017	TUBE1	41.251	-0.25014	71.9535	0.552495	39.3453	-0.318378	37.9188	-0.371656	TUBE1	882.415	1539.18	841.649	811.134
WWOX	-1.41014	0.405219	1.41014	0.405219	WWOX	WWOX	51741	WW domain containing oxidoreductase	WWOX	0.549325	1.15438	-0.00872449	0.720751	WWOX	11.7686	12.0283	0.851851	8.34568	8.61382	0.356013	WWOX	9.54233	0.549325	14.5142	1.15438	6.48134	-0.00872449	10.7463	0.720751	WWOX	181.085	266.082	143.886	172.179
SOX6	-1.40951	0.768225	1.40951	0.768225	SOX6	SOX6	55553	SRY (sex determining region Y)-box 6	SOX6	1.57678	-0.738641	0.82912	-0.981368	SOX6	0.56304	0.754264	0.419068	0.399459	0.48071	-0.0761236	SOX6	1.25616	1.57678	0.252368	-0.738641	0.748131	0.82912	0.213288	-0.981368	SOX6	112.053	22.5146	66.7425	18.9099
GNAL	-1.40906	0.581791	1.40906	0.581791	GNAL	GNAL	2774	guanine nucleotide binding protein (G protein), alpha activating activity polypeptide, olfactory type	GNAL	-0.608457	0.789765	-0.106437	-0.701729	GNAL	2.58235	2.89153	0.0906539	1.83267	1.87181	-0.404083	GNAL	1.5906	-0.608457	4.19245	0.789765	2.2526	-0.106437	1.49102	-0.701729	GNAL	52.0242	139.181	73.6765	48.7673
SLC25A21	-1.40872	0.630804	1.40872	0.630804	SLC25A21	SLC25A21	89874	solute carrier family 25 (mitochondrial oxoadipate carrier), member 21	SLC25A21	-0.251997	0.483044	-1.17841	0.420694	SLC25A21	1.02091	1.05422	0.115524	0.72471	0.838883	-0.378857	SLC25A21	0.791321	-0.251997	1.31711	0.483044	0.416366	-1.17841	1.2614	0.420694	SLC25A21	21.6755	50.4299	13.5991	30.1453
LOC100508120	-1.40851	0.303724	1.40851	0.303724	LOC100508120	LOC100508120	100508120	uncharacterized LOC100508120	LOC100508120	0.312771	0.255258	0.148914	-0.56923	LOC100508120	2.29032	2.29078	0.284015	1.62606	1.67668	-0.210158	LOC100508120	2.33643	0.312771	2.24512	0.255258	2.08558	0.148914	1.26778	-0.56923	LOC100508120	33.0155	31.7252	29.4707	17.9146
LOC100129034	-1.40831	0.189225	1.40831	0.189225	LOC100129034	LOC100129034	100129034	uncharacterized LOC100129034	LOC100129034	0.509855	0.114201	-0.0255499	-0.338321	LOC100129034	3.57716	3.61084	0.312028	2.54004	2.55498	-0.181935	LOC100129034	4.10289	0.509855	3.11879	0.114201	2.83085	-0.0255499	2.2791	-0.338321	LOC100129034	231.252	175.785	159.555	128.457
UBXN4	-1.40827	0.347778	1.40827	0.347778	UBXN4	UBXN4	23190	UBX domain protein 4	UBXN4	-0.324503	0.443346	-0.302715	-0.566284	UBXN4	102.364	106.01	0.0594215	72.6882	72.9917	-0.434499	UBXN4	78.447	-0.324503	133.574	0.443346	79.6407	-0.302715	66.3427	-0.566284	UBXN4	3057.44	5206	3103.96	2585.68
ADO	-1.4081	0.539268	1.4081	0.539268	ADO	ADO	84890	2-aminoethanethiol (cysteamine) dioxygenase	ADO	0.20456	0.158991	0.360199	-0.984146	ADO	8.80727	8.80837	0.181776	6.25472	6.94597	-0.311973	ADO	8.94747	0.20456	8.66927	0.158991	9.96672	0.360199	3.92522	-0.984146	ADO	322.151	312.135	358.849	141.326
GLE1	-1.40781	0.619382	1.40781	0.619382	GLE1	GLE1	2733	GLE1 RNA export mediator homolog (yeast)	GLE1	-0.53501	1.02795	-0.575519	0.0815546	GLE1	36.813	42.3472	0.246471	26.1491	26.8301	-0.246982	GLE1	21.4167	-0.53501	63.2777	1.02795	20.8237	-0.575519	32.8365	0.0815546	GLE1	687.323	2027.34	668.292	1048.01
PLCB4	-1.40768	0.385528	1.40768	0.385528	PLCB4	PLCB4	5332	phospholipase C, beta 4	PLCB4	-0.198759	0.696837	-0.236074	-0.252489	PLCB4	29.1986	30.6165	0.249039	20.7424	20.7427	-0.244282	PLCB4	21.4073	-0.198759	39.8257	0.696837	20.8607	-0.236074	20.6247	-0.252489	PLCB4	1153.54	2153.22	1120.75	1113.69
DHRS7	-1.40765	0.337874	1.40765	0.337874	DHRS7	DHRS7	51635	dehydrogenase/reductase (SDR family) member 7	DHRS7	-0.00191204	0.100684	-0.0524697	-0.835329	DHRS7	62.2049	62.2442	0.0493861	44.1907	45.8272	-0.4439	DHRS7	60.0319	-0.00191204	64.4565	0.100684	57.9646	-0.0524697	33.6898	-0.835329	DHRS7	725.341	778.802	700.363	407.06
SMCR7	-1.40732	0.219689	1.40732	0.219689	SMCR7	SMCR7	125170	Smith-Magenis syndrome chromosome region, candidate 7	SMCR7	0.00759027	0.199764	-0.126951	-0.651589	SMCR7	6.18246	6.19618	0.103677	4.39309	4.46591	-0.38927	SMCR7	5.78411	0.00759027	6.60825	0.199764	5.26909	-0.126951	3.66272	-0.651589	SMCR7	133.063	153.509	120.483	86.5873
CNN1	-1.40645	0.720199	1.40645	0.720199	CNN1	CNN1	1264	calponin 1, basic, smooth muscle	CNN1	-0.294186	0.00153016	-1.82305	0.546274	CNN1	0.39278	0.394844	-0.146328	0.27927	0.378834	-0.638386	CNN1	0.354519	-0.294186	0.43517	0.00153016	0.122859	-1.82305	0.634809	0.546274	CNN1	5.00235	6.14036	1.73357	8.95731
C6orf163	-1.40645	0.593773	1.40645	0.593773	C6orf163	C6orf163	206412	chromosome 6 open reading frame 163	C6orf163	-0.703108	0.651504	-0.910033	-0.125682	C6orf163	0.285127	0.31713	-0.025802	0.202729	0.210265	-0.517858	C6orf163	0.178299	-0.703108	0.455961	0.651504	0.154475	-0.910033	0.266055	-0.125682	C6orf163	2.00094	5.11697	1.73357	2.98577
HLA-F-AS1	-1.40641	0.653478	1.40641	0.653478	HLA-F-AS1	HLA-F-AS1	285830	HLA-F antisense RNA 1	HLA-F-AS1	0.753672	-0.949547	-0.187785	-0.992125	HLA-F-AS1	1.11868	1.31931	-0.0979372	0.795418	0.826524	-0.589955	HLA-F-AS1	2.01868	0.753672	0.619937	-0.949547	1.05114	-0.187785	0.601908	-0.992125	HLA-F-AS1	16.0075	7.16375	10.4014	8.95731
FAM193B	-1.40611	0.603771	1.40611	0.603771	FAM193B	FAM193B	54540	family with sequence similarity 193, member B	FAM193B	0.644054	-0.0639205	0.522105	-0.925392	FAM193B	7.39778	7.62158	0.290067	5.26116	5.9372	-0.201643	FAM193B	9.45501	0.644054	5.78816	-0.0639205	8.68864	0.522105	3.18575	-0.925392	FAM193B	329.155	217.983	291.24	107.488
BAG4	-1.4061	0.178596	1.4061	0.178596	BAG4	BAG4	9530	BCL2-associated athanogene 4	BAG4	-0.239519	0.239699	-0.462116	-0.52111	BAG4	21.1116	21.4034	8.95262e-05	15.0143	15.0174	-0.491613	BAG4	17.881	-0.239519	24.9259	0.239699	15.3244	-0.462116	14.7104	-0.52111	BAG4	775.365	1079.14	666.636	636.763
WHAMMP2	-1.40545	0.457539	1.40545	0.457539	WHAMMP2	WHAMMP2	440253	WAS protein homolog associated with actin, golgi membranes and microtubules pseudogene 2	WHAMMP2	0.365777	-0.392954	-0.123552	-0.885687	WHAMMP2	0.670876	0.694204	-0.0135882	0.477339	0.494088	-0.50462	WHAMMP2	0.872655	0.365777	0.515753	-0.392954	0.621641	-0.123552	0.366534	-0.885687	WHAMMP2	45.0212	26.6082	32.0711	18.9099
LOC100506540	-1.40533	0.575349	1.40533	0.575349	LOC100506540				LOC100506540	-0.458523	0.445514	-1.08342	0.0885805	LOC100506540	0.800715	0.840339	-0.00650427	0.569768	0.61742	-0.497417	LOC100506540	0.585338	-0.458523	1.09534	0.445514	0.379573	-1.08342	0.855266	0.0885805	LOC100506540	7.36612	13.7842	4.77669	10.763
CLN6	-1.405	0.342722	1.405	0.342722	CLN6	CLN6	54982	ceroid-lipofuscinosis, neuronal 6, late infantile, variant	CLN6	0.256456	0.103783	0.0798999	-0.70081	CLN6	6.42383	6.43282	0.180119	4.5721	4.74049	-0.310455	CLN6	6.77288	0.256456	6.09276	0.103783	5.99273	0.0798999	3.48825	-0.70081	CLN6	141.066	126.901	124.817	72.6537
LRP2BP	-1.4047	0.582864	1.4047	0.582864	LRP2BP	LRP2BP	55805	LRP2 binding protein	LRP2BP	1.11767	-0.171585	-0.410849	0.37641	LRP2BP	0.2525	0.278128	0.47304	0.179754	0.186486	-0.0172195	LRP2BP	0.394742	1.11767	0.161514	-0.171585	0.136831	-0.410849	0.236142	0.37641	LRP2BP	20.0094	8.18714	6.93595	11.97
RUSC2	-1.40449	0.157835	1.40449	0.157835	RUSC2	RUSC2	9853	RUN and SH3 domain containing 2	RUSC2	0.106921	0.13575	-0.147315	-0.59011	RUSC2	5.38357	5.38384	0.121335	3.83311	3.87833	-0.368713	RUSC2	5.33005	0.106921	5.43763	0.13575	4.46888	-0.147315	3.28779	-0.59011	RUSC2	279.131	288.598	234.032	172.179
DLEU2	-1.40445	0.735197	1.40445	0.735197	DLEU2	DLEU2	8847	deleted in lymphocytic leukemia 2 (non-protein coding)	DLEU2	-0.544515	0.881903	-1.36216	0.719535	DLEU2	1.26981	1.42816	0.168694	0.904131	1.14982	-0.321311	DLEU2	0.774534	-0.544515	2.08178	0.881903	0.439446	-1.36216	1.86019	0.719535	DLEU2	20.3042	54.5733	11.5199	48.7643
TMEM2	-1.40438	0.516627	1.40438	0.516627	TMEM2	TMEM2	23670	transmembrane protein 2	TMEM2	-0.0476133	0.462625	0.290774	-0.855625	TMEM2	3.85892	3.91941	0.207506	2.74778	2.96753	-0.282426	TMEM2	3.23346	-0.0476133	4.60537	0.462625	4.0882	0.290774	1.84685	-0.855625	TMEM2	209.098	297.807	264.37	119.431
OSBPL1A	-1.40434	0.323369	1.40434	0.323369	OSBPL1A	OSBPL1A	114876	oxysterol binding protein-like 1A	OSBPL1A	0.146322	0.897019	0.0666896	-0.00314176	OSBPL1A	35.9498	37.1734	0.52167	25.599	25.6065	0.0317739	OSBPL1A	27.7144	0.146322	46.6324	0.897019	26.2261	0.0666896	24.9869	-0.00314176	OSBPL1A	910.428	1456.29	896.257	819.096
ZFP2	-1.40428	0.26713	1.40428	0.26713	ZFP2	ZFP2	80108	zinc finger protein 2 homolog (mouse)	ZFP2	-0.253349	0.364299	-0.344793	-0.523915	ZFP2	1.32205	1.35245	0.0554751	0.941444	0.943258	-0.434354	ZFP2	1.06729	-0.253349	1.63762	0.364299	1.00174	-0.344793	0.884777	-0.523915	ZFP2	24.0113	36.8421	22.5364	19.9051
NUMB	-1.40401	0.142069	1.40401	0.142069	NUMB	NUMB	8650	numb homolog (Drosophila)	NUMB	0.064683	0.325583	-0.133313	-0.455531	NUMB	54.0868	54.3081	0.195133	38.523	38.7635	-0.294422	NUMB	49.4108	0.064683	59.2053	0.325583	43.0744	-0.133313	34.4526	-0.455531	NUMB	1683.79	2033.48	1468.34	1185.35
HOXD8	-1.40383	0.495431	1.40383	0.495431	HOXD8	HOXD8	3234	homeobox D8	HOXD8	0.579608	0.0973877	0.389918	-0.691659	HOXD8	3.54197	3.59155	0.338498	2.52308	2.70242	-0.150871	HOXD8	4.18626	0.579608	2.99684	0.0973877	3.67049	0.389918	1.73435	-0.691659	HOXD8	63.0296	47.0761	59.8082	29.8577
MGAT5	-1.40345	0.474443	1.40345	0.474443	MGAT5	MGAT5	4249	mannosyl (alpha-1,6-)-glycoprotein beta-1,6-N-acetyl-glucosaminyltransferase	MGAT5	-0.477765	0.628159	-0.327145	-0.500419	MGAT5	1.73364	1.86254	0.075197	1.23527	1.2375	-0.413782	MGAT5	1.18168	-0.477765	2.54341	0.628159	1.31172	-0.327145	1.16327	-0.500419	MGAT5	96.0452	206.725	106.615	94.5494
CATSPER3	-1.4031	0.0562399	1.4031	0.0562399	CATSPER3	CATSPER3	347732	cation channel, sperm associated 3	CATSPER3	0.358756	0.179934	-0.137683	-0.300863	CATSPER3	1.74322	1.74657	0.269345	1.2424	1.24439	-0.219273	CATSPER3	1.85467	0.358756	1.63846	0.179934	1.31469	-0.137683	1.17409	-0.300863	CATSPER3	22.0103	19.4445	15.6021	13.9336
LATS2	-1.40301	0.298394	1.40301	0.298394	LATS2	LATS2	26524	LATS, large tumor suppressor, homolog 2 (Drosophila)	LATS2	0.101373	0.0370948	-0.0699325	-0.768659	LATS2	3.58253	3.58342	0.0692339	2.55345	2.62868	-0.419296	LATS2	3.66323	0.101373	3.5036	0.0370948	3.25309	-0.0699325	2.00428	-0.768659	LATS2	200.094	191.374	177.691	109.478
SIPA1L3	-1.40284	0.189439	1.40284	0.189439	SIPA1L3	SIPA1L3	23094	signal-induced proliferation-associated 1 like 3	SIPA1L3	0.49618	0.0219035	-0.151743	-0.306884	SIPA1L3	2.59062	2.62569	0.259042	1.84669	1.84936	-0.229313	SIPA1L3	3.05344	0.49618	2.19795	0.0219035	1.9487	-0.151743	1.75002	-0.306884	SIPA1L3	243.114	175	155.155	139.336
TUFT1	-1.40267	0.317773	1.40267	0.317773	TUFT1	TUFT1	7286	tuftelin 1	TUFT1	-0.244891	0.494932	-0.358408	-0.367903	TUFT1	13.3488	13.79	0.12502	9.5167	9.51675	-0.363156	TUFT1	10.3297	-0.244891	17.2503	0.494932	9.54807	-0.358408	9.48544	-0.367903	TUFT1	299.141	504.533	276.505	274.691
ZMYM5	-1.40265	0.0178408	1.40265	0.0178408	ZMYM5	ZMYM5	9205	zinc finger, MYM-type 5	ZMYM5	0.129694	0.0931002	-0.440265	-0.313251	ZMYM5	25.5069	25.509	0.111397	18.1848	18.2024	-0.376758	ZMYM5	25.8325	0.129694	25.1855	0.0931002	17.4017	-0.440265	19.0032	-0.313251	ZMYM5	487.229	394.006	362.317	338.387
UCK1	-1.40227	0.192053	1.40227	0.192053	UCK1	UCK1	83549	uridine-cytidine kinase 1	UCK1	0.00683641	0.30344	-0.129446	-0.535797	UCK1	29.556	29.7123	0.155138	21.0773	21.2867	-0.332622	UCK1	26.6687	0.00683641	32.7558	0.30344	24.2648	-0.129446	18.3085	-0.535797	UCK1	538.253	661.11	489.734	369.24
CENPV	-1.4021	0.555975	1.4021	0.555975	CENPV	CENPV	201161	centromere protein V	CENPV	-0.412129	0.964505	-0.110048	-0.312752	CENPV	4.28211	4.77879	0.276188	3.05407	3.06161	-0.2114	CENPV	2.65738	-0.412129	6.9002	0.964505	3.27634	-0.110048	2.84688	-0.312752	CENPV	26.0122	67.5439	32.0711	27.8672
HSPA13	-1.40162	0.143029	1.40162	0.143029	HSPA13	HSPA13	6782	heat shock protein 70kDa family, member 13	HSPA13	0.229122	0.322456	-0.00950019	-0.413114	HSPA13	51.631	51.658	0.275789	36.8366	37.1976	-0.211307	HSPA13	49.9876	0.229122	53.3284	0.322456	42.3672	-0.00950019	32.028	-0.413114	HSPA13	1933.91	2063.16	1639.09	1239.09
C22orf29	-1.40109	0.231213	1.40109	0.231213	C22orf29	C22orf29	79680	chromosome 22 open reading frame 29	C22orf29	0.188419	0.487901	-0.392273	0.0954976	C22orf29	3.67094	3.69073	0.33816	2.62006	2.65759	-0.148388	C22orf29	3.30903	0.188419	4.07243	0.487901	2.21256	-0.392273	3.10262	0.0954976	C22orf29	217.784	268.028	145.62	204.2
C6orf70	-1.40049	0.0778851	1.40049	0.0778851	C6orf70	C6orf70	55780	chromosome 6 open reading frame 70	C6orf70	-0.0430808	0.213139	-0.467041	-0.334763	C6orf70	10.2208	10.2611	0.0850293	7.29801	7.30568	-0.400902	C6orf70	9.35232	-0.0430808	11.1699	0.213139	6.97099	-0.467041	7.64037	-0.334763	C6orf70	179.084	213.889	133.485	146.303
GEMIN8	-1.39992	0.117162	1.39993	0.117162	GEMIN8	GEMIN8	54960	gem (nuclear organelle) associated protein 8	GEMIN8	0.40687	0.19721	-0.0338203	-0.332799	GEMIN8	10.3741	10.4015	0.30204	7.41049	7.45031	-0.183309	GEMIN8	11.156	0.40687	9.64705	0.19721	8.21954	-0.0338203	6.68107	-0.332799	GEMIN8	335.158	292.69	247.034	199.051
ZNF687	-1.39964	0.501969	1.39964	0.501969	ZNF687	ZNF687	57592	zinc finger protein 687	ZNF687	-0.11133	0.180679	0.128695	-1.02947	ZNF687	0.756155	0.760031	0.0346741	0.540248	0.584356	-0.450385	ZNF687	0.683375	-0.11133	0.836686	0.180679	0.807075	0.128695	0.361637	-1.02947	ZNF687	30.0913	36.8422	35.5383	15.9241
ALS2CR8	-1.39921	0.456725	1.39921	0.456725	ALS2CR8	ALS2CR8	79800	amyotrophic lateral sclerosis 2 (juvenile) chromosome region, candidate 8	ALS2CR8	0.525842	0.228552	0.400848	-0.615687	ALS2CR8	3.86057	3.88108	0.377197	2.7591	2.9321	-0.10742	ALS2CR8	4.27955	0.525842	3.48261	0.228552	3.92438	0.400848	1.93983	-0.615687	ALS2CR8	227.107	181.141	202.828	99.5257
ZNF266	-1.39863	0.303769	1.39863	0.303769	ZNF266	ZNF266	10781	zinc finger protein 266	ZNF266	-0.591133	0.113	-0.699378	-0.746792	ZNF266	4.52611	4.66155	-0.239067	3.23609	3.23653	-0.723085	ZNF266	3.54603	-0.591133	5.77707	0.113	3.28971	-0.699378	3.18335	-0.746792	ZNF266	114.054	190.351	105.748	105.497
RNF215	-1.3982	0.153609	1.3982	0.153609	RNF215	RNF215	200312	ring finger protein 215	RNF215	-0.113841	0.00260301	-0.746308	-0.332064	RNF215	10.9333	10.9422	-0.0556189	7.81961	7.90033	-0.539186	RNF215	10.5009	-0.113841	11.3836	0.00260301	6.77384	-0.746308	9.02682	-0.332064	RNF215	184.087	199.562	118.75	158.246
FRS3	-1.39789	0.136094	1.39789	0.136094	FRS3	FRS3	10817	fibroblast growth factor receptor substrate 3	FRS3	0.137936	0.272977	-0.090369	-0.465215	FRS3	3.55573	3.55963	0.205456	2.54365	2.56514	-0.277792	FRS3	3.39315	0.137936	3.7261	0.272977	2.89652	-0.090369	2.23376	-0.465215	FRS3	68.032	74.7077	58.0747	44.7865
KCNJ14	-1.39766	0.6587	1.39766	0.6587	KCNJ14	KCNJ14	3770	potassium inwardly-rectifying channel, subfamily J, member 14	KCNJ14	0.141449	-0.509134	0.215726	-1.54943	KCNJ14	0.352579	0.361579	-0.183843	0.252264	0.300959	-0.666854	KCNJ14	0.441752	0.141449	0.281406	-0.509134	0.465091	0.215726	0.136827	-1.54943	KCNJ14	13.0061	8.18714	13.8686	3.98103
HYAL3	-1.39748	0.663977	1.39748	0.663977	HYAL3	HYAL3	8372	hyaluronoglucosaminidase 3	HYAL3	-0.415004	1.12251	-0.698948	0.440805	HYAL3	11.9687	13.7084	0.353751	8.56449	9.24139	-0.129071	HYAL3	7.02469	-0.415004	20.3922	1.12251	5.76968	-0.698948	12.7131	0.440805	HYAL3	103.175	322.369	93.1718	183.984
CIR1	-1.39743	0.342445	1.39743	0.342445	CIR1	CIR1	9541	corepressor interacting with RBPJ, 1	CIR1	-0.119968	0.455444	-0.0500604	-0.580024	CIR1	15.6515	15.9638	0.167738	11.2002	11.3897	-0.315042	CIR1	12.8218	-0.119968	19.1058	0.455444	13.4584	-0.0500604	9.32091	-0.580024	CIR1	208.098	310.088	218.43	151.279
WHAMMP3	-1.3974	0.574368	1.3974	0.574368	WHAMMP3	WHAMMP3	339005	WAS protein homolog associated with actin, golgi membranes and microtubules pseudogene 3	WHAMMP3	-0.277718	0.424809	0.225845	-1.04425	WHAMMP3	0.811224	0.835388	0.0735453	0.580523	0.637678	-0.409202	WHAMMP3	0.635916	-0.277718	1.03486	0.424809	0.901545	0.225845	0.37381	-1.04425	WHAMMP3	22.0103	35.8188	31.2043	12.9383
TRPV4	-1.39723	0.246512	1.39723	0.246512	TRPV4	TRPV4	59341	transient receptor potential cation channel, subfamily V, member 4	TRPV4	0.258607	0.808656	0.165128	-0.0629998	TRPV4	3.7932	3.86233	0.533632	2.71481	2.72329	0.0510643	TRPV4	3.13484	0.258607	4.58983	0.808656	2.93816	0.165128	2.50843	-0.0629998	TRPV4	97.0456	134.064	91.0125	77.63
PTPN18	-1.39558	0.424032	1.39558	0.424032	PTPN18	PTPN18	26469	protein tyrosine phosphatase, non-receptor type 18 (brain-derived)	PTPN18	-0.316593	0.624147	-0.435007	-0.219164	PTPN18	21.1195	22.252	0.153777	15.1331	15.1755	-0.327086	PTPN18	15.2436	-0.316593	29.2603	0.624147	14.0424	-0.435007	16.3086	-0.219164	PTPN18	504.237	972.223	463.731	544.405
C15orf17	-1.39513	0.433039	1.39513	0.433039	C15orf17	FAM219B	57184	family with sequence similarity 219, member B	C15orf17	-0.0405169	0.255515	0.0979261	-0.843726	C15orf17	24.9098	25.041	0.107499	17.8549	18.8142	-0.3729	C15orf17	22.4809	-0.0405169	27.6012	0.255515	24.7451	0.0979261	12.8832	-0.843726	C15orf17	769.362	944.592	846.85	440.899
ANKS6	-1.39498	0.168607	1.39498	0.168607	ANKS6	ANKS6	203286	ankyrin repeat and sterile alpha motif domain containing 6	ANKS6	0.0299623	0.482297	-0.205024	-0.243211	ANKS6	12.8295	12.9875	0.25613	9.1969	9.19771	-0.224118	ANKS6	10.968	0.0299623	15.007	0.482297	9.31943	-0.205024	9.07599	-0.243211	ANKS6	779.366	1066.38	662.225	644.926
TUBA4B	-1.39498	0.360401	1.39498	0.360401	TUBA4B	TUBA4B	80086	tubulin, alpha 4b (pseudogene)	TUBA4B	0.443112	0.150699	0.197707	-0.564391	TUBA4B	8.58798	8.63212	0.296906	6.15633	6.37232	-0.183342	TUBA4B	9.50394	0.443112	7.7603	0.150699	8.01732	0.197707	4.72732	-0.564391	TUBA4B	114.054	93.1288	96.2133	56.731
ZC3H6	-1.39481	0.355724	1.39481	0.355724	ZC3H6	ZC3H6	376940	zinc finger CCCH-type containing 6	ZC3H6	-0.0279321	0.212439	-0.00319775	-0.772438	ZC3H6	1.45253	1.45758	0.0922535	1.04138	1.07861	-0.387818	ZC3H6	1.33643	-0.0279321	1.57872	0.212439	1.35954	-0.00319775	0.797678	-0.772438	ZC3H6	155.073	183.187	157.755	92.5589
ZNF121	-1.39447	0.0416036	1.39447	0.0416036	ZNF121	ZNF121	7675	zinc finger protein 121	ZNF121	-0.0174988	0.015185	-0.580573	-0.381178	ZNF121	4.158	4.15827	-0.00115689	2.98178	2.9889	-0.480875	ZNF121	4.11117	-0.0174988	4.20537	0.015185	2.78268	-0.580573	3.19512	-0.381178	ZNF121	64.0301	65.4972	43.3393	49.7628
GPR173	-1.39361	0.710407	1.39361	0.710407	GPR173	GPR173	54328	G protein-coupled receptor 173	GPR173	0.874515	-0.244809	0.805086	-1.13303	GPR173	0.327901	0.352884	0.314853	0.235289	0.290394	-0.163972	GPR173	0.483301	0.874515	0.222468	-0.244809	0.460593	0.805086	0.120195	-1.13303	GPR173	20.0094	9.21054	19.0693	4.97628
LOC284454	-1.3935	0.572095	1.3935	0.572095	LOC284454	LOC284454	284454	uncharacterized LOC284454	LOC284454	-0.230901	0.417442	0.251829	-1.02271	LOC284454	4.84282	4.9656	0.0932704	3.4753	3.81989	-0.385441	LOC284454	3.86824	-0.230901	6.06295	0.417442	5.40542	0.251829	2.23437	-1.02271	LOC284454	62.0292	97.2223	86.6786	35.8292
ZNF490	-1.39319	0.361817	1.39319	0.361817	ZNF490	ZNF490	57474	zinc finger protein 490	ZNF490	0.330147	0.0632684	-0.667332	0.103966	ZNF490	2.90338	2.9158	0.196708	2.08398	2.15888	-0.281683	ZNF490	3.18473	0.330147	2.64688	0.0632684	1.59515	-0.667332	2.72261	0.103966	ZNF490	192.09	159.649	96.2133	164.217
USP24	-1.39305	0.343471	1.39305	0.343471	USP24	USP24	23358	ubiquitin specific peptidase 24	USP24	0.0104043	0.506917	-0.518456	0.0792896	USP24	6.84597	6.94757	0.258661	4.91438	5.02022	-0.219583	USP24	5.76371	0.0104043	8.13144	0.506917	3.99484	-0.518456	6.04559	0.0792896	USP24	625.294	882.165	433.393	655.874
GALNT13	-1.39274	0.579171	1.39274	0.579171	GALNT13	GALNT13	114805	UDP-N-acetyl-alpha-D-galactosamine:polypeptide N-acetylgalactosaminyltransferase 13 (GalNAc-T13)	GALNT13	-0.467717	0.849694	-0.598027	0.0241563	GALNT13	6.21907	6.87864	0.190989	4.46536	4.56958	-0.286935	GALNT13	3.93945	-0.467717	9.81784	0.849694	3.59922	-0.598027	5.53993	0.0241563	GALNT13	220.103	548.539	201.094	309.525
IGSF5	-1.39231	0.723374	1.39231	0.723374	IGSF5	IGSF5	150084	immunoglobulin superfamily, member 5	IGSF5	-0.0303105	1.00237	-1.0446	1.06169	IGSF5	0.526495	0.560577	0.486031	0.378144	0.483449	0.00854582	IGSF5	0.368095	-0.0303105	0.753058	1.00237	0.182234	-1.0446	0.784665	1.06169	IGSF5	7.00329	14.3275	3.46714	14.9288
ZFP41	-1.39197	0.17381	1.39197	0.17381	ZFP41	ZFP41	286128	zinc finger protein 41 homolog (mouse)	ZFP41	0.029804	0.0935144	-0.187618	-0.643312	ZFP41	3.0108	3.01154	0.0616592	2.16298	2.19001	-0.415465	ZFP41	2.94505	0.029804	3.07802	0.0935144	2.53304	-0.187618	1.84699	-0.643312	ZFP41	138.065	144.298	118.75	86.5873
PCSK4	-1.3914	0.68397	1.3914	0.68397	PCSK4	PCSK4	54760	proprotein convertase subtilisin/kexin type 4	PCSK4	1.03938	-0.138502	0.796377	-0.848577	PCSK4	2.14486	2.32607	0.450437	1.54151	1.79887	-0.0260998	PCSK4	3.22617	1.03938	1.42597	-0.138502	2.72607	0.796377	0.871679	-0.848577	PCSK4	81.0381	35.8188	68.4761	21.8956
ZNF44	-1.39136	0.290502	1.39136	0.290502	ZNF44	ZNF44	51710	zinc finger protein 44	ZNF44	0.305648	0.0349884	-0.612249	-0.000102282	ZNF44	9.35964	9.40085	0.170318	6.72698	6.87894	-0.306176	ZNF44	10.2801	0.305648	8.52159	0.0349884	5.44105	-0.612249	8.31682	-0.000102282	ZNF44	262.123	217.983	137.819	210.994
RUFY3	-1.39059	0.188066	1.39059	0.188066	RUFY3	RUFY3	22902	RUN and FYVE domain containing 3	RUFY3	-0.0101453	0.273702	-0.148107	-0.539732	RUFY3	9.44538	9.49112	0.131778	6.79235	6.85501	-0.343919	RUFY3	8.56044	-0.0101453	10.4218	0.273702	7.77975	-0.148107	5.93027	-0.539732	RUFY3	226.106	296.784	223.631	176.16
SNX6	-1.3904	0.506841	1.3904	0.506841	SNX6	SNX6	58533	sorting nexin 6	SNX6	-0.559674	0.619357	-0.51092	-0.3804	SNX6	28.9034	31.3502	0.029842	20.7878	20.8091	-0.44566	SNX6	19.2082	-0.559674	43.4921	0.619357	19.8684	-0.51092	21.7497	-0.3804	SNX6	544.256	1233.19	565.145	617.059
GOLGA2P5	-1.38991	0.564891	1.38991	0.564891	GOLGA2P5	GOLGA2P5	55592	golgin A2 pseudogene 5	GOLGA2P5	0.833501	-0.162789	0.345038	-0.624315	GOLGA2P5	9.45386	10.023	0.335356	6.80176	7.18923	-0.139639	GOLGA2P5	13.3526	0.833501	6.69349	-0.162789	9.51752	0.345038	4.86093	-0.624315	GOLGA2P5	302.142	151.462	215.83	110.473
CYP4F11	-1.38936	0.45037	1.38936	0.45037	CYP4F11	CYP4F11	57834	cytochrome P450, family 4, subfamily F, polypeptide 11	CYP4F11	-0.639408	0.36371	-0.704067	-0.520472	CYP4F11	8.29275	8.79897	-0.137849	5.96876	5.98085	-0.612269	CYP4F11	5.85753	-0.639408	11.7404	0.36371	5.6008	-0.704067	6.36089	-0.520472	CYP4F11	173.081	353.071	162.089	186.113
IER5L	-1.3889	0.369645	1.3889	0.369645	IER5L	IER5L	389792	immediate early response 5-like	IER5L	0.113393	0.118544	0.0547417	-0.770684	IER5L	22.7673	22.7674	0.115969	16.3924	17.0677	-0.357971	IER5L	22.7267	0.113393	22.808	0.118544	21.8213	0.0547417	12.3141	-0.770684	IER5L	582.274	584.357	559.077	315.496
SCFD1	-1.3886	0.450913	1.3886	0.450913	SCFD1	SCFD1	23256	sec1 family domain containing 1	SCFD1	-0.425866	0.495411	-0.657199	-0.220521	SCFD1	28.0094	29.4492	0.0347725	20.1709	20.4023	-0.43886	SCFD1	20.3534	-0.425866	38.5451	0.495411	17.338	-0.657199	23.4667	-0.220521	SCFD1	399.188	761.404	345.848	462.794
NAB2	-1.38855	0.453855	1.38855	0.453855	NAB2	NAB2	4665	NGFI-A binding protein 2 (EGR1 binding protein 2)	NAB2	0.401279	0.102332	0.269629	-0.713183	NAB2	7.88303	7.92538	0.251805	5.67716	6.00969	-0.221777	NAB2	8.74358	0.401279	7.10718	0.102332	7.98103	0.269629	4.03834	-0.713183	NAB2	224.106	182.164	204.562	103.507
ATM	-1.38826	0.350077	1.38826	0.350077	ATM	ATM	472	ataxia telangiectasia mutated	ATM	0.475917	0.0583942	0.124884	-0.53712	ATM	3.43655	3.4726	0.267156	2.47545	2.54088	-0.206118	ATM	3.97161	0.475917	2.97358	0.0583942	3.11383	0.124884	1.96794	-0.53712	ATM	526.247	394.006	412.59	260.757
AIF1L	-1.38781	0.276818	1.38781	0.276818	AIF1L	AIF1L	83543	allograft inflammatory factor 1-like	AIF1L	-0.445371	0.0725211	-0.472437	-0.846032	AIF1L	40.272	40.9224	-0.186425	29.0184	29.262	-0.659234	AIF1L	33.6552	-0.445371	48.1896	0.0725211	33.0297	-0.472437	25.4942	-0.846032	AIF1L	1112.52	1593.42	1092.15	842.982
PFKL	-1.38731	0.339305	1.38731	0.339305	PFKL	PFKL	5211	phosphofructokinase, liver	PFKL	-0.18905	0.425459	-0.131457	-0.57672	PFKL	54.616	55.8594	0.118205	39.3682	39.8379	-0.354088	PFKL	44.1395	-0.18905	67.5792	0.425459	45.9372	-0.131457	33.7386	-0.57672	PFKL	1224.58	1874.86	1272.44	934.546
KIAA1530	-1.38731	0.392057	1.38731	0.392057	KIAA1530	UVSSA	57654	UV-stimulated scaffold protein A	KIAA1530	0.70079	-0.141004	-0.0780457	-0.306745	KIAA1530	1.8011	1.8783	0.279893	1.29827	1.30235	-0.192395	KIAA1530	2.41124	0.70079	1.34535	-0.141004	1.40536	-0.0780457	1.19934	-0.306745	KIAA1530	110.052	61.4036	64.1422	54.7391
TNFAIP1	-1.38712	0.0996454	1.38712	0.0996454	TNFAIP1	TNFAIP1	7126	tumor necrosis factor, alpha-induced protein 1 (endothelial)	TNFAIP1	-0.179075	0.0374875	-0.423278	-0.662494	TNFAIP1	28.2268	28.3063	-0.0707939	20.3492	20.4192	-0.542886	TNFAIP1	26.1858	-0.179075	30.4269	0.0374875	22.1082	-0.423278	18.7302	-0.662494	TNFAIP1	965.609	1122	815.246	690.681
ABCD4	-1.38688	0.313574	1.38688	0.313574	ABCD4	ABCD4	5826	ATP-binding cassette, sub-family D (ALD), member 4	ABCD4	-0.106905	0.294907	-0.0870291	-0.668655	ABCD4	16.3061	16.4645	0.0940011	11.7574	11.9971	-0.377842	ABCD4	14.1864	-0.106905	18.7426	0.294907	14.3832	-0.0870291	9.611	-0.668655	ABCD4	415.195	557.749	422.125	280.662
SOCS6	-1.38683	0.141551	1.38683	0.141551	SOCS6	SOCS6	9306	suppressor of cytokine signaling 6	SOCS6	0.0985055	0.235841	-0.117499	-0.491736	SOCS6	5.79727	5.80384	0.167173	4.18023	4.21544	-0.304617	SOCS6	5.5278	0.0985055	6.07987	0.235841	4.75914	-0.117499	3.67174	-0.491736	SOCS6	319.15	351.024	274.771	211.99
POU5F1	-1.38674	0.662464	1.38674	0.662464	POU5F1	POU5F1	5460	POU class 5 homeobox 1	POU5F1	0.387753	0.466251	0.884643	-0.974028	POU5F1	0.336641	0.336765	0.427002	0.242757	0.29489	-0.0446927	POU5F1	0.327606	0.387753	0.345925	0.466251	0.462307	0.884643	0.127472	-0.974028	POU5F1	4.00188	5.11697	6.93429	1.99051
SAMD12	-1.38672	0.294615	1.38672	0.294615	SAMD12	SAMD12	401474	sterile alpha motif domain containing 12	SAMD12	0.362737	0.1645	0.112101	-0.528222	SAMD12	5.00721	5.01903	0.263618	3.61083	3.70011	-0.208061	SAMD12	5.36332	0.362737	4.67475	0.1645	4.50801	0.112101	2.8922	-0.528222	SAMD12	348.164	264.035	320.711	204.028
MIR663A	-1.38621	0.59094	1.38621	0.59094	MIR663A	MIR663A	724033	microRNA 663a	MIR663A	-0.507178	0.612969	-0.906756	0.0702465	MIR663A	2917.07	3139.65	0.0528954	2104.34	2226.13	-0.418255	MIR663A	1978.55	-0.507178	4300.76	0.612969	1499.9	-0.906756	2952.36	0.0702465	MIR663A	8.00376	17.3977	6.0675	11.9431
MTMR9LP	-1.38612	0.598984	1.38612	0.598984	MTMR9LP	MTMR9LP	339483	myotubularin related protein 9-like, pseudogene	MTMR9LP	0.727757	0.310913	0.78007	-0.683501	MTMR9LP	5.07518	5.12823	0.519335	3.66143	4.14264	0.0482843	MTMR9LP	5.86398	0.727757	4.39248	0.310913	6.08051	0.78007	2.20476	-0.683501	MTMR9LP	127.06	95.1755	131.751	47.7723
MUTED	-1.38578	0.223147	1.38578	0.223147	MUTED	BLOC1S5	63915	biogenesis of lysosomal organelles complex-1, subunit 5, muted	MUTED	0.687948	0.148851	-0.0634801	-0.0411184	MUTED	27.1432	27.6183	0.4184	19.5869	19.5875	-0.0522993	MUTED	32.7192	0.687948	22.5174	0.148851	19.4357	-0.0634801	19.7393	-0.0411184	MUTED	787.633	542.3	471.384	475.99
CNKSR1	-1.38574	0.214576	1.38574	0.214576	CNKSR1	CNKSR1	10256	connector enhancer of kinase suppressor of Ras 1	CNKSR1	0.0955013	0.553493	-0.0183088	-0.274007	CNKSR1	5.16468	5.22987	0.324497	3.72702	3.74166	-0.146158	CNKSR1	4.40665	0.0955013	6.0531	0.553493	4.07238	-0.0183088	3.41095	-0.274007	CNKSR1	105.049	144.298	97.08	80.6158
INO80D	-1.38565	0.175516	1.38565	0.175516	INO80D	INO80D	54891	INO80 complex subunit D	INO80D	0.109854	0.550414	-0.200699	-0.0801607	INO80D	0.825324	0.834963	0.330134	0.595622	0.596141	-0.14043	INO80D	0.708457	0.109854	0.961469	0.550414	0.571252	-0.200699	0.621031	-0.0801607	INO80D	101.048	137.135	81.4779	88.5778
METTL12	-1.38561	0.106021	1.38561	0.106021	METTL12	METTL12	751071	methyltransferase like 12	METTL12	0.0267225	0.196906	-0.502141	-0.21528	METTL12	1.76565	1.76872	0.111814	1.27427	1.28058	-0.35871	METTL12	1.66452	0.0267225	1.87292	0.196906	1.15368	-0.502141	1.40747	-0.21528	METTL12	20.0094	22.5146	13.8686	16.9194
ATP5S	-1.3852	0.049929	1.3852	0.049929	ATP5S	ATP5S	27109	ATP synthase, H+ transporting, mitochondrial Fo complex, subunit s (factor B)	ATP5S	0.0750724	0.283037	-0.257777	-0.324303	ATP5S	7.65877	7.67868	0.179055	5.529	5.53047	-0.29104	ATP5S	7.12619	0.0750724	8.23116	0.283037	5.65796	-0.257777	5.40298	-0.324303	ATP5S	116.055	137.135	91.8793	90.5684
ALOX12	-1.38464	0.482426	1.38464	0.482426	ALOX12	ALOX12	239	arachidonate 12-lipoxygenase	ALOX12	0.642443	0.0376962	0.328599	-0.587486	ALOX12	0.515905	0.527277	0.34007	0.372591	0.391527	-0.129444	ALOX12	0.636199	0.642443	0.418356	0.0376962	0.511819	0.328599	0.271236	-0.587486	ALOX12	14.0066	9.21054	11.2682	5.97154
UBR4	-1.38421	0.25145	1.38421	0.25145	UBR4	UBR4	23352	ubiquitin protein ligase E3 component n-recognin 4	UBR4	0.314175	0.0162791	-0.557095	-0.0505854	UBR4	5.40801	5.43686	0.165227	3.90692	3.96727	-0.30384	UBR4	5.99619	0.314175	4.87753	0.0162791	3.27791	-0.557095	4.65663	-0.0505854	UBR4	962.452	782.896	526.139	747.438
KDM6A	-1.38403	0.056905	1.38403	0.056905	KDM6A	KDM6A	7403	lysine (K)-specific demethylase 6A	KDM6A	0.0163732	0.240491	-0.307156	-0.373735	KDM6A	14.1811	14.2239	0.128432	10.2462	10.249	-0.340446	KDM6A	13.1213	0.0163732	15.3265	0.240491	10.4854	-0.307156	10.0125	-0.373735	KDM6A	747.351	872.954	597.216	570.282
SH3GLB2	-1.38403	0.317144	1.38403	0.317144	SH3GLB2	SH3GLB2	56904	SH3-domain GRB2-like endophilin B2	SH3GLB2	-0.041283	0.474917	-0.00875028	-0.495369	SH3GLB2	28.4215	28.8775	0.216817	20.5353	20.828	-0.25206	SH3GLB2	23.7657	-0.041283	33.9893	0.474917	24.3077	-0.00875028	17.3483	-0.495369	SH3GLB2	432.203	618.129	442.061	315.496
PHF2	-1.38342	0.4693	1.38342	0.4693	PHF2	PHF2	5253	PHD finger protein 2	PHF2	-0.214213	0.409509	0.056433	-0.797615	PHF2	1.86358	1.90728	0.0976478	1.34708	1.40652	-0.370591	PHF2	1.5013	-0.214213	2.31327	0.409509	1.81109	0.056433	1.00195	-0.797615	PHF2	79.0372	121.784	95.3465	52.7486
NAF1	-1.38312	0.325189	1.38312	0.325189	NAF1	NAF1	92345	nuclear assembly factor 1 homolog (S. cerevisiae)	NAF1	-0.182755	0.470131	-0.168127	-0.48034	NAF1	4.4135	4.52697	0.143688	3.19099	3.20968	-0.324234	NAF1	3.51977	-0.182755	5.53417	0.470131	3.55564	-0.168127	2.86373	-0.48034	NAF1	57.0268	93.1288	59.8082	49.7628
RNF44	-1.38256	0.414579	1.38256	0.414579	RNF44	RNF44	22838	ring finger protein 44	RNF44	0.332415	-0.137406	0.0229148	-0.762591	RNF44	2.1465	2.17502	0.0975044	1.55255	1.61044	-0.369838	RNF44	2.52607	0.332415	1.82396	-0.137406	2.03834	0.0229148	1.18254	-0.762591	RNF44	102.048	73.6843	82.3447	47.7723
INADL	-1.38235	0.441022	1.38235	0.441022	INADL	INADL	10207	InaD-like (Drosophila)	INADL	0.673986	0.0447106	0.267826	-0.483368	INADL	12.48	12.778	0.359348	9.02814	9.33583	-0.107771	INADL	15.5214	0.673986	10.0346	0.0447106	11.7129	0.267826	6.95877	-0.483368	INADL	1318.62	852.486	995.07	591.182
ZMAT1	-1.38212	0.599158	1.38212	0.599158	ZMAT1	ZMAT1	84460	zinc finger, matrin-type 1	ZMAT1	0.875377	0.00022384	0.585624	-0.64379	ZMAT1	3.66026	3.82992	0.4378	2.64829	2.89235	-0.0290833	ZMAT1	4.95719	0.875377	2.70264	0.00022384	4.05519	0.585624	1.7295	-0.64379	ZMAT1	216.102	120.76	165.556	73.649
BTAF1	-1.38141	0.336855	1.38141	0.336855	BTAF1	BTAF1	9044	BTAF1 RNA polymerase II, B-TFIID transcription factor-associated, 170kDa (Mot1 homolog, S. cerevisiae)	BTAF1	0.300209	-0.0352024	-0.00154964	-0.665724	BTAF1	20.0186	20.154	0.132503	14.4914	14.8771	-0.333637	BTAF1	22.4863	0.300209	17.8217	-0.0352024	18.2423	-0.00154964	11.5118	-0.665724	BTAF1	1572.74	1246.49	1275.91	805.163
MIRLET7BHG	-1.38111	0.456344	1.38111	0.456344	MIRLET7BHG	MIRLET7BHG	400931	MIRLET7B host gene (non-protein coding)	MIRLET7BHG	0.347776	-0.467535	-0.221722	-0.829684	MIRLET7BHG	0.294012	0.305827	-0.0598797	0.212881	0.217624	-0.525703	MIRLET7BHG	0.390015	0.347776	0.22164	-0.467535	0.262812	-0.221722	0.172437	-0.829684	MIRLET7BHG	18.0085	10.2339	12.135	7.96205
DAPK1	-1.38096	0.662601	1.38096	0.662601	DAPK1	DAPK1	1612	death-associated protein kinase 1	DAPK1	-1.61584	0.0977727	-0.893161	-1.55626	DAPK1	1.94535	2.29862	-0.759033	1.40869	1.44605	-1.22471	DAPK1	1.07417	-1.61584	3.52307	0.0977727	1.77264	-0.893161	1.11946	-1.55626	DAPK1	63.0296	206.725	104.014	65.6869
LHFP	-1.38075	0.770458	1.38075	0.770458	LHFP	LHFP	10186	lipoma HMGIC fusion partner	LHFP	-1.69764	0.911387	-1.35438	-0.36279	LHFP	3.4652	4.98099	-0.393129	2.50965	2.6593	-0.858583	LHFP	1.40291	-1.69764	8.55907	0.911387	1.77977	-1.35438	3.53884	-0.36279	LHFP	28.0132	170.907	35.5382	70.6632
ZFHX3	-1.38072	0.150327	1.38072	0.150327	ZFHX3	ZFHX3	463	zinc finger homeobox 3	ZFHX3	0.332768	0.293719	0.0511296	-0.355484	ZFHX3	1.36477	1.36489	0.313244	0.988445	0.998275	-0.152177	ZFHX3	1.38336	0.332768	1.34642	0.293719	1.13803	0.0511296	0.858521	-0.355484	ZFHX3	195.092	185.234	153.421	123.412
C2orf63	-1.38068	0.477228	1.38068	0.477228	C2orf63	CLHC1	130162	clathrin heavy chain linker domain containing 1	C2orf63	0.205124	-0.155078	0.0651287	-0.945831	C2orf63	2.70639	2.72751	0.0250231	1.96019	2.08175	-0.440351	C2orf63	3.06624	0.205124	2.38877	-0.155078	2.78268	0.0651287	1.38081	-0.945831	C2orf63	160.075	121.784	144.753	72.6517
REV1	-1.38066	0.199022	1.38066	0.199022	REV1	REV1	51455	REV1, polymerase (DNA directed)	REV1	-0.172768	0.306961	-0.343867	-0.452653	REV1	18.2379	18.4906	0.0670966	13.2096	13.2189	-0.39826	REV1	15.4443	-0.172768	21.5368	0.306961	13.7171	-0.343867	12.7208	-0.452653	REV1	715.336	997.808	635.354	589.192
ZNF608	-1.37999	0.486092	1.37999	0.486092	ZNF608	ZNF608	57507	zinc finger protein 608	ZNF608	0.43337	0.189842	0.381718	-0.687827	ZNF608	4.35991	4.37545	0.311606	3.15937	3.37892	-0.153055	ZNF608	4.74386	0.43337	4.00703	0.189842	4.57702	0.381718	2.18081	-0.687827	ZNF608	264.124	223.1	254.835	121.421
ATF3	-1.37998	0.742465	1.37999	0.742465	ATF3	ATF3	467	activating transcription factor 3	ATF3	1.16336	-0.483719	0.792478	-1.04214	ATF3	7.16889	8.36896	0.339821	5.19491	6.28087	-0.124831	ATF3	12.6871	1.16336	4.05081	-0.483719	9.81105	0.792478	2.75068	-1.04214	ATF3	229.108	71.6375	175.958	48.7676
ATXN7L2	-1.37938	0.0135713	1.37938	0.0135713	ATXN7L2	ATXN7L2	127002	ataxin 7-like 2	ATXN7L2	0.297713	0.294766	-0.222377	-0.113189	ATXN7L2	1.84071	1.84071	0.296239	1.33444	1.3354	-0.167783	ATXN7L2	1.84259	0.297713	1.83883	0.294766	1.28489	-0.222377	1.38591	-0.113189	ATXN7L2	41.0193	40.9357	28.6039	30.853
SLC25A45	-1.37895	0.54464	1.37895	0.54464	SLC25A45	SLC25A45	283130	solute carrier family 25, member 45	SLC25A45	0.329442	-0.127656	0.236079	-0.961431	SLC25A45	3.00988	3.04772	0.100893	2.18273	2.37343	-0.362676	SLC25A45	3.52654	0.329442	2.56891	-0.127656	3.30555	0.236079	1.44131	-0.961431	SLC25A45	74.0348	53.2164	68.4761	29.8577
ASB16	-1.37882	0.39462	1.37882	0.39462	ASB16	ASB16	92591	ankyrin repeat and SOCS box containing 16	ASB16	0.714952	0.0679054	0.212534	-0.356552	ASB16	0.654872	0.671407	0.391429	0.47495	0.484218	-0.0720087	ASB16	0.819496	0.714952	0.523319	0.0679054	0.578501	0.212534	0.389935	-0.356552	ASB16	16.2042	10.3478	11.4389	7.71032
KCNRG	-1.37812	0.270717	1.37812	0.270717	KCNRG	KCNRG	283518	potassium channel regulator	KCNRG	0.211562	-0.392316	-0.497792	-0.608365	KCNRG	0.617958	0.631541	-0.090377	0.448407	0.448736	-0.553079	KCNRG	0.761819	0.211562	0.501264	-0.392316	0.465924	-0.497792	0.431548	-0.608365	KCNRG	11.053	6.77009	6.2928	5.82851
PPP2R2C	-1.37806	0.540683	1.37806	0.540683	PPP2R2C	PPP2R2C	5522	protein phosphatase 2, regulatory subunit B, gamma	PPP2R2C	-1.18418	0.0412353	-0.876508	-1.19172	PPP2R2C	0.269221	0.293867	-0.571471	0.195362	0.196528	-1.03411	PPP2R2C	0.176062	-1.18418	0.411672	0.0412353	0.217913	-0.876508	0.175144	-1.19172	PPP2R2C	7.00329	16.3743	8.66786	6.9668
LRRN1	-1.37803	0.477832	1.37803	0.477832	LRRN1	LRRN1	57633	leucine rich repeat neuronal 1	LRRN1	0.304631	-0.569578	-0.902301	-0.287868	LRRN1	0.598858	0.626556	-0.132474	0.434575	0.444465	-0.595085	LRRN1	0.810785	0.304631	0.442326	-0.569578	0.351223	-0.902301	0.537707	-0.287868	LRRN1	30.0141	16.3743	13.0018	19.9051
SOCS1	-1.37803	0.510242	1.37803	0.510242	SOCS1	SOCS1	8651	suppressor of cytokine signaling 1	SOCS1	0.322368	-0.644952	-0.299598	-0.948203	SOCS1	1.66375	1.75813	-0.161292	1.20734	1.23797	-0.6239	SOCS1	2.3264	0.322368	1.18985	-0.644952	1.51166	-0.299598	0.964283	-0.948203	SOCS1	24.0113	12.2807	15.6021	9.95257
HIST1H1E	-1.37796	0.0513874	1.37796	0.0513874	HIST1H1E	HIST1H1E	3008	histone cluster 1, H1e	HIST1H1E	0.309033	0.220408	-0.297505	-0.0981124	HIST1H1E	10.1825	10.1873	0.264721	7.38956	7.40721	-0.197808	HIST1H1E	10.5001	0.309033	9.87449	0.220408	6.89616	-0.297505	7.91827	-0.0981124	HIST1H1E	62.0292	58.3334	40.7389	46.7771
LIME1	-1.37787	0.159985	1.37787	0.159985	LIME1	LIME1	54923	Lck interacting transmembrane adaptor 1	LIME1	-0.194209	0.152583	-0.362667	-0.603843	LIME1	4.11397	4.14372	-0.0208132	2.98574	2.99618	-0.483255	LIME1	3.64807	-0.194209	4.63936	0.152583	3.24603	-0.362667	2.74632	-0.603843	LIME1	37.0174	47.0761	32.9379	27.8672
SPTSSA	-1.37767	0.283506	1.37767	0.283506	SPTSSA	SPTSSA	171546	serine palmitoyltransferase, small subunit A	SPTSSA	-0.16571	0.267579	-0.178204	-0.644389	SPTSSA	29.4324	29.7649	0.0509346	21.3639	21.6433	-0.411297	SPTSSA	25.3285	-0.16571	34.2013	0.267579	25.1101	-0.178204	18.1766	-0.644389	SPTSSA	603.284	814.621	598.082	432.937
SCLY	-1.37747	0.303747	1.37747	0.303747	SCLY	SCLY	51540	selenocysteine lyase	SCLY	-0.118121	0.526363	-0.355857	-0.159934	SCLY	22.4395	23.0016	0.204121	16.2904	16.328	-0.257895	SCLY	17.9477	-0.118121	28.0555	0.526363	15.221	-0.355857	17.435	-0.159934	SCLY	426.199	666.227	361.449	414.024
ZNF70	-1.37676	0.318436	1.37676	0.318436	ZNF70	ZNF70	7621	zinc finger protein 70	ZNF70	0.127103	0.00450659	-0.0506851	-0.740255	ZNF70	1.20455	1.20564	0.0658047	0.874916	0.900021	-0.39547	ZNF70	1.25683	0.127103	1.15444	0.00450659	1.11111	-0.0506851	0.688931	-0.740255	ZNF70	49.023	45.0293	43.3393	26.8719
KCNE3	-1.3764	0.342583	1.3764	0.342583	KCNE3	KCNE3	10008	potassium voltage-gated channel, Isk-related family, member 3	KCNE3	0.358944	0.0231946	0.0638731	-0.603544	KCNE3	36.404	36.6507	0.191069	26.4486	27.1593	-0.269835	KCNE3	40.8963	0.358944	32.4051	0.0231946	33.3318	0.0638731	20.9868	-0.603544	KCNE3	1198.56	949.709	976.868	615.069
USP9X	-1.37639	0.113967	1.37639	0.113967	USP9X	USP9X	8239	ubiquitin specific peptidase 9, X-linked	USP9X	-0.0128469	0.0879059	-0.260446	-0.586284	USP9X	18.8245	18.8359	0.0375295	13.6767	13.7639	-0.423365	USP9X	18.1785	-0.0128469	19.4934	0.0879059	15.3117	-0.260446	12.2162	-0.586284	USP9X	2261.06	2424.42	1905.2	1519.76
ARHGAP5	-1.37628	0.0381527	1.37628	0.0381527	ARHGAP5	ARHGAP5	394	Rho GTPase activating protein 5	ARHGAP5	-0.0724751	0.0970865	-0.485899	-0.411041	ARHGAP5	6.77065	6.78234	0.0123057	4.91952	4.92117	-0.44847	ARHGAP5	6.38423	-0.0724751	7.18045	0.0970865	4.79353	-0.485899	5.04882	-0.411041	ARHGAP5	614.289	690.79	461.13	485.685
ZNF467	-1.37566	0.492005	1.37566	0.492005	ZNF467	ZNF467	168544	zinc finger protein 467	ZNF467	0.250533	-0.188846	0.0767691	-0.935339	ZNF467	1.74204	1.76228	0.0308438	1.26633	1.34504	-0.429285	ZNF467	2.02858	0.250533	1.49598	-0.188846	1.79839	0.0767691	0.89168	-0.935339	ZNF467	43.0202	31.7252	38.1386	18.9099
ZNF354B	-1.37561	0.513039	1.37561	0.513039	ZNF354B	ZNF354B	117608	zinc finger protein 354B	ZNF354B	0.339325	-0.00436489	0.265031	-0.850212	ZNF354B	11.7735	11.8571	0.16748	8.55874	9.20604	-0.292591	ZNF354B	13.2628	0.339325	10.4514	-0.00436489	12.5971	0.265031	5.81499	-0.850212	ZNF354B	270.127	212.866	256.569	118.436
RGS5	-1.37541	0.0144988	1.37541	0.0144988	RGS5	RGS5	8490	regulator of G-protein signaling 5	RGS5	-0.250211	-0.205968	-0.636526	-0.739381	RGS5	8.1948	8.19576	-0.228089	5.95806	5.96185	-0.687954	RGS5	8.0701	-0.250211	8.32142	-0.205968	6.17428	-0.636526	5.74942	-0.739381	RGS5	295.139	273.246	246.167	213.98
PELI1	-1.37488	0.310234	1.37488	0.310234	PELI1	PELI1	57162	pellino E3 ubiquitin protein ligase 1	PELI1	-0.0803632	0.596359	-0.159689	-0.242921	PELI1	22.1433	22.7551	0.257998	16.1056	16.1123	-0.201305	PELI1	17.514	-0.0803632	27.9962	0.596359	16.577	-0.159689	15.6477	-0.242921	PELI1	638.3	1020.32	604.15	570.282
RNF217	-1.37472	0.0381468	1.37472	0.0381468	RNF217	RNF217	154214	ring finger protein 217	RNF217	0.263136	0.246908	-0.296095	-0.112133	RNF217	7.39769	7.3978	0.255022	5.38124	5.39218	-0.204114	RNF217	7.43941	0.263136	7.3562	0.246908	5.04886	-0.296095	5.7355	-0.112133	RNF217	120.056	118.714	81.4779	92.5589
GAPVD1	-1.37445	0.359499	1.37445	0.359499	GAPVD1	GAPVD1	26130	GTPase activating protein and VPS9 domains 1	GAPVD1	-0.225911	0.535545	-0.224128	-0.383944	GAPVD1	24.2182	25.0664	0.154817	17.6203	17.6473	-0.304036	GAPVD1	18.6008	-0.225911	31.5321	0.535545	18.6238	-0.224128	16.6709	-0.383944	GAPVD1	1272.6	2157.31	1274.18	1140.56
TTF1	-1.37412	0.542643	1.37412	0.542643	TTF1	TTF1	7270	transcription termination factor, RNA polymerase I	TTF1	-0.530144	0.680687	-0.55893	-0.207534	TTF1	8.83578	9.62525	0.0752714	6.43016	6.4779	-0.383232	TTF1	5.8076	-0.530144	13.4429	0.680687	5.69287	-0.55893	7.26293	-0.207534	TTF1	175.082	405.264	171.624	218.956
LINC00319	-1.37411	0.566794	1.37411	0.566794	LINC00319	LINC00319	284836	long intergenic non-protein coding RNA 319	LINC00319	0.250761	-0.231132	0.181334	-1.07871	LINC00319	0.295896	0.300032	0.00981405	0.215336	0.236197	-0.448686	LINC00319	0.34968	0.250761	0.250384	-0.231132	0.333251	0.181334	0.139143	-1.07871	LINC00319	10.0047	7.16375	9.53465	3.98103
OSR2	-1.37402	0.0857989	1.37402	0.0857989	OSR2	OSR2	116039	odd-skipped related 2 (Drosophila)	OSR2	0.392797	0.129081	-0.140366	-0.254565	OSR2	5.90478	5.92946	0.260939	4.29744	4.30081	-0.197466	OSR2	6.46989	0.392797	5.38903	0.129081	4.47094	-0.140366	4.13068	-0.254565	OSR2	108.051	89.0352	72.81	69.668
ZNF420	-1.37384	0.0910929	1.37384	0.0910929	ZNF420	ZNF420	147923	zinc finger protein 420	ZNF420	0.0807197	0.0997665	-0.219622	-0.51631	ZNF420	11.3465	11.3467	0.0902431	8.25896	8.30266	-0.367966	ZNF420	11.2718	0.0807197	11.4216	0.0997665	9.15338	-0.219622	7.45194	-0.51631	ZNF420	319.15	323.392	259.169	210.994
CCDC88C	-1.3738	0.0556884	1.3738	0.0556884	CCDC88C	CCDC88C	440193	coiled-coil domain containing 88C	CCDC88C	0.566356	0.341244	0.00433441	-0.0130842	CCDC88C	1.35517	1.35929	0.4538	0.986436	0.986454	-0.00437489	CCDC88C	1.46513	0.566356	1.25346	0.341244	0.992409	0.00433441	0.980499	-0.0130842	CCDC88C	110.052	94.1522	74.5436	73.649
C1orf228	-1.37361	0.801242	1.37361	0.801242	C1orf228	C1orf228	339541	chromosome 1 open reading frame 228	C1orf228	0.794581	-0.805008	0.918857	-1.84523	C1orf228	1.17797	1.36367	-0.00521326	0.857576	1.2821	-0.463184	C1orf228	2.05068	0.794581	0.676665	-0.805008	2.23516	0.918857	0.329031	-1.84523	C1orf228	31.0146	10.2339	33.8047	4.97628
ZBTB5	-1.37361	0.190905	1.37361	0.190905	ZBTB5	ZBTB5	9925	zinc finger and BTB domain containing 5	ZBTB5	0.120545	0.0441547	-0.143528	-0.607711	ZBTB5	4.41345	4.415	0.0823501	3.21304	3.2547	-0.37562	ZBTB5	4.53186	0.120545	4.29814	0.0441547	3.77383	-0.143528	2.73558	-0.607711	ZBTB5	206.097	195.468	171.624	124.407
ZNF431	-1.37292	0.21538	1.37292	0.21538	ZNF431	ZNF431	170959	zinc finger protein 431	ZNF431	-0.0970227	0.190919	-0.199251	-0.621348	ZNF431	2.75964	2.77339	0.0469483	2.01005	2.03159	-0.4103	ZNF431	2.49754	-0.0970227	3.04924	0.190919	2.32669	-0.199251	1.7365	-0.621348	ZNF431	93.0437	113.597	86.6786	64.6917
ANKRD26	-1.37228	0.141356	1.37227	0.141356	ANKRD26	ANKRD26	22852	ankyrin repeat domain 26	ANKRD26	0.385449	0.333637	0.0939472	-0.288001	ANKRD26	3.08224	3.08274	0.359543	2.24608	2.26579	-0.0970268	ANKRD26	3.13809	0.385449	3.02739	0.333637	2.56398	0.0939472	1.9676	-0.288001	ANKRD26	211.099	203.655	172.49	132.369
FRMD6-AS1	-1.37221	0.734545	1.37221	0.734545	FRMD6-AS1	FRMD6-AS1	145438	FRMD6 antisense RNA 1	FRMD6-AS1	-0.936235	1.37663	-0.0436327	-0.428966	FRMD6-AS1	0.755073	1.01092	0.220198	0.550262	0.555176	-0.236299	FRMD6-AS1	0.338741	-0.936235	1.6831	1.37663	0.62888	-0.0436327	0.481472	-0.428966	FRMD6-AS1	7.00329	34.7973	13.0018	9.95419
MBD5	-1.37196	0.340186	1.37196	0.340186	MBD5	MBD5	55777	methyl-CpG binding domain protein 5	MBD5	0.425794	-0.0947461	-0.0313979	-0.550033	MBD5	3.79206	3.85393	0.165524	2.76397	2.80874	-0.290715	MBD5	4.54176	0.425794	3.16611	-0.0947461	3.30823	-0.0313979	2.30925	-0.550033	MBD5	270.127	188.309	196.761	137.346
GPR126	-1.37188	0.160917	1.37187	0.160917	GPR126	GPR126	57211	G protein-coupled receptor 126	GPR126	0.176881	0.255095	-0.0347337	-0.445589	GPR126	9.03788	9.0412	0.215988	6.58798	6.65487	-0.240161	GPR126	8.79618	0.176881	9.28622	0.255095	7.59612	-0.0347337	5.71363	-0.445589	GPR126	608.286	641.667	525.272	395.117
EXD2	-1.37179	0.0582261	1.37179	0.0582261	EXD2	EXD2	55218	exonuclease 3'-5' domain containing 2	EXD2	-0.202069	0.00225238	-0.502867	-0.609079	EXD2	6.62381	6.64042	-0.0999083	4.82857	4.83184	-0.555973	EXD2	6.17098	-0.202069	7.10986	0.00225238	5.00962	-0.502867	4.65406	-0.609079	EXD2	304.143	352.047	240.1	232.89
ZNF33B	-1.37155	0.324152	1.37155	0.324152	ZNF33B	ZNF33B	7582	zinc finger protein 33B	ZNF33B	0.508506	0.295577	0.281208	-0.388749	ZNF33B	6.75482	6.77322	0.402041	4.92494	5.05829	-0.0537705	ZNF33B	7.27215	0.508506	6.27429	0.295577	6.21211	0.281208	3.90447	-0.388749	ZNF33B	428.201	369.445	365.784	229.904
SLC25A37	-1.37154	0.122021	1.37154	0.122021	SLC25A37	SLC25A37	51312	solute carrier family 25 (mitochondrial iron transporter), member 37	SLC25A37	-0.272419	0.0569804	-0.50225	-0.624787	SLC25A37	8.39407	8.44883	-0.107719	6.12017	6.12569	-0.563518	SLC25A37	7.48847	-0.272419	9.40919	0.0569804	6.38568	-0.50225	5.8657	-0.624787	SLC25A37	127.06	159.649	108.348	99.5257
P2RX5-TAX1BP3	-1.37146	0.6477	1.37146	0.6477	P2RX5-TAX1BP3	P2RX5-TAX1BP3	100533970	P2RX5-TAX1BP3 readthrough	P2RX5-TAX1BP3	0.0881142	0.67027	-0.881531	0.728495	P2RX5-TAX1BP3	0.567557	0.579148	0.379192	0.413835	0.479949	-0.076518	P2RX5-TAX1BP3	0.463859	0.0881142	0.694436	0.67027	0.236861	-0.881531	0.723036	0.728495	P2RX5-TAX1BP3	28.8665	43.2155	14.7401	44.9953
TMC6	-1.37098	0.386601	1.37098	0.386601	TMC6	TMC6	11322	transmembrane channel-like 6	TMC6	-0.175879	0.166929	-0.0823558	-0.837019	TMC6	28.4294	28.6303	-0.00447468	20.7365	21.4498	-0.459687	TMC6	25.2447	-0.175879	32.0159	0.166929	26.9354	-0.0823558	15.9642	-0.837019	TMC6	677.318	854.533	721.166	425.97
ZNF417	-1.37084	0.187237	1.37084	0.187237	ZNF417	ZNF417	147687	zinc finger protein 417	ZNF417	0.161742	-0.298618	-0.538231	-0.508762	ZNF417	0.70413	0.713111	-0.0684381	0.513649	0.513676	-0.523496	ZNF417	0.825931	0.161742	0.600291	-0.298618	0.50843	-0.538231	0.518922	-0.508762	ZNF417	38.0179	27.6316	23.4032	23.8862
HOXB6	-1.37084	0.330376	1.37084	0.330376	HOXB6	HOXB6	3216	homeobox B6	HOXB6	0.479124	0.115871	-0.464772	0.149657	HOXB6	1.46708	1.47873	0.297497	1.07021	1.09457	-0.157558	HOXB6	1.66391	0.479124	1.29354	0.115871	0.864946	-0.464772	1.32419	0.149657	HOXB6	25.0118	19.4443	13.0018	19.9052
PLCG1	-1.37038	0.159444	1.37038	0.159444	PLCG1	PLCG1	5335	phospholipase C, gamma 1	PLCG1	0.0273134	0.298266	-0.135067	-0.448503	PLCG1	23.327	23.43	0.16279	17.0223	17.1228	-0.291785	PLCG1	21.2362	0.0273134	25.6237	0.298266	18.9756	-0.135067	15.2701	-0.448503	PLCG1	1086.51	1310.97	970.8	781.276
ISL2	-1.3701	0.62977	1.3701	0.62977	ISL2	ISL2	64843	ISL LIM homeobox 2	ISL2	1.05878	-0.540807	-0.294992	-0.095601	ISL2	1.09425	1.26675	0.258984	0.798663	0.80057	-0.195297	ISL2	1.90492	1.05878	0.628571	-0.540807	0.745336	-0.294992	0.855805	-0.095601	ISL2	31.0146	10.2339	12.135	13.9336
ZBTB34	-1.36987	0.477844	1.36987	0.477844	ZBTB34	ZBTB34	403341	zinc finger and BTB domain containing 34	ZBTB34	-0.18664	0.0444568	-0.0136333	-1.03663	ZBTB34	2.59823	2.60657	-0.0710914	1.8967	2.01716	-0.525132	ZBTB34	2.39825	-0.18664	2.81489	0.0444568	2.7038	-0.0136333	1.33052	-1.03663	ZBTB34	156.073	183.187	175.958	86.5873
ATG16L2	-1.36977	0.741678	1.36977	0.741678	ATG16L2	ATG16L2	89849	autophagy related 16-like 2 (S. cerevisiae)	ATG16L2	1.14282	-0.234137	0.983722	-0.982895	ATG16L2	11.1423	12.4353	0.454344	8.13442	10.0981	0.000413716	ATG16L2	17.9567	1.14282	6.91385	-0.234137	16.0817	0.983722	4.11454	-0.982895	ATG16L2	356.167	137.135	318.977	81.611
LINC00476	-1.36938	0.177205	1.36938	0.177205	LINC00476	LINC00476	100128782	long intergenic non-protein coding RNA 476	LINC00476	0.14748	0.569304	-0.162828	-0.0274266	LINC00476	5.65313	5.71364	0.358392	4.12825	4.13279	-0.0951271	LINC00476	4.88425	0.14748	6.54304	0.569304	3.939	-0.162828	4.32659	-0.0274266	LINC00476	85.2343	103.91	57.0862	66.8589
LOC338758	-1.36937	0.531607	1.36937	0.531607	LOC338758	LOC338758	338758	uncharacterized LOC338758	LOC338758	0.481044	0.32108	0.547133	-0.652026	LOC338758	0.795111	0.796333	0.401062	0.580641	0.631512	-0.0524465	LOC338758	0.840436	0.481044	0.75223	0.32108	0.879831	0.547133	0.383192	-0.652026	LOC338758	24.0113	21.4913	25.1368	10.9478
DKFZP586I1420	-1.36917	0.568959	1.36917	0.568959	DKFZP586I1420	DKFZP586I1420	222161	uncharacterized protein DKFZp586I1420	DKFZP586I1420	0.75359	-0.450768	-0.00588299	-0.597904	DKFZP586I1420	3.34872	3.6447	0.151411	2.4458	2.49747	-0.301893	DKFZP586I1420	5.08339	0.75359	2.206	-0.450768	3.00282	-0.00588299	1.99211	-0.597904	DKFZP586I1420	132.062	57.31	78.0107	51.7533
DAAM1	-1.36896	0.289151	1.36896	0.289151	DAAM1	DAAM1	23002	dishevelled associated activator of morphogenesis 1	DAAM1	-0.154011	0.0469445	-0.205966	-0.807267	DAAM1	2.50997	2.51606	-0.053533	1.83348	1.87344	-0.506616	DAAM1	2.34111	-0.154011	2.69101	0.0469445	2.2583	-0.205966	1.48858	-0.807267	DAAM1	97.0456	111.55	93.6129	61.7059
MYEOV	-1.36881	0.496613	1.36881	0.496613	MYEOV	MYEOV	26579	myeloma overexpressed (in a subset of t(11;14) positive multiple myelomas)	MYEOV	-0.262915	0.80857	-0.303335	-0.0568581	MYEOV	51.2321	54.8053	0.272828	37.4282	37.5648	-0.180097	MYEOV	35.3401	-0.262915	74.2706	0.80857	34.3637	-0.303335	40.7659	-0.0568581	MYEOV	752.354	1581.14	731.567	867.864
WDR27	-1.36874	0.106353	1.36874	0.106353	WDR27	WDR27	253769	WD repeat domain 27	WDR27	-0.131086	0.172221	-0.37881	-0.485746	WDR27	2.36621	2.3793	0.0205676	1.72876	1.72995	-0.432278	WDR27	2.13011	-0.131086	2.62849	0.172221	1.79403	-0.37881	1.66586	-0.485746	WDR27	70.0329	91.082	61.5418	57.7249
LOC729799	-1.36809	0.135006	1.36809	0.135006	LOC729799				LOC729799	0.62314	0.627255	0.358499	-0.0124226	LOC729799	2.11078	2.11078	0.625197	1.54287	1.55564	0.173038	LOC729799	2.10777	0.62314	2.11379	0.627255	1.75452	0.358499	1.35675	-0.0124226	LOC729799	51.024	51.1697	42.4725	32.8435
VPS13C	-1.36749	0.340707	1.36749	0.340707	VPS13C	VPS13C	54832	vacuolar protein sorting 13 homolog C (S. cerevisiae)	VPS13C	0.184227	0.0246845	0.00820167	-0.702341	VPS13C	3.2152	3.22012	0.104456	2.35118	2.42283	-0.34707	VPS13C	3.39799	0.184227	3.04225	0.0246845	3.00769	0.00820167	1.83797	-0.702341	VPS13C	459.216	410.381	406.523	248.814
LOC100505549	-1.36744	0.341739	1.36744	0.341739	LOC100505549	LOC100505549	100505549	uncharacterized LOC100505549	LOC100505549	0.0683444	0.50445	0.127736	-0.457894	LOC100505549	1.91746	1.93941	0.286397	1.40223	1.43121	-0.165079	LOC100505549	1.64849	0.0683444	2.23032	0.50445	1.71777	0.127736	1.14465	-0.457894	LOC100505549	29.9457	40.515	31.2043	20.7933
ASTN2	-1.36726	0.495662	1.36726	0.495662	ASTN2	ASTN2	23245	astrotactin 2	ASTN2	-0.160131	0.601495	-0.622397	0.161181	ASTN2	6.52911	6.7579	0.220682	4.77532	4.95249	-0.230608	ASTN2	5.01439	-0.160131	8.5014	0.601495	3.63967	-0.622397	6.26531	0.161181	ASTN2	84.0395	146.345	63.2754	103.507
LOC100268168	-1.36712	0.73887	1.36712	0.73887	LOC100268168	LOC100268168	100268168	uncharacterized LOC100268168	LOC100268168	0.409607	-0.365857	0.68442	-1.54296	LOC100268168	1.28187	1.32844	0.0218751	0.937637	1.23116	-0.429269	LOC100268168	1.67711	0.409607	0.979769	-0.365857	2.02903	0.68442	0.433292	-1.54296	LOC100268168	19.0089	10.2339	20.8029	4.97628
LOC440944	-1.36712	0.438199	1.36712	0.438199	LOC440944	LOC440944	440944	uncharacterized LOC440944	LOC440944	-0.0912	0.81495	0.0347682	-0.213299	LOC440944	10.6063	11.1336	0.361875	7.75811	7.78679	-0.0892656	LOC440944	7.74771	-0.0912	14.5195	0.81495	8.45461	0.0347682	7.11898	-0.213299	LOC440944	131.062	245.614	143.02	120.426
DDX18	-1.36697	0.546871	1.36697	0.546871	DDX18	DDX18	8886	DEAD (Asp-Glu-Ala-Asp) box polypeptide 18	DDX18	-0.545903	0.683667	-0.507064	-0.257133	DDX18	60.6938	66.2884	0.0688817	44.4003	44.5669	-0.382098	DDX18	39.6347	-0.545903	92.9422	0.683667	40.7162	-0.507064	48.4177	-0.257133	DDX18	1443.68	3385.38	1483.07	1763.59
IMPACT	-1.36693	0.177714	1.36693	0.177714	IMPACT	IMPACT	55364	Impact homolog (mouse)	IMPACT	0.0858426	0.360089	-0.055074	-0.400864	IMPACT	18.0986	18.1804	0.222966	13.2404	13.3355	-0.227969	IMPACT	16.4576	0.0858426	19.9032	0.360089	14.9261	-0.055074	11.745	-0.400864	IMPACT	598.281	723.539	542.608	426.965
MTSS1	-1.36683	0.690924	1.36683	0.690924	MTSS1	MTSS1	9788	metastasis suppressor 1	MTSS1	-1.45805	0.340161	-1.40195	-0.6176	MTSS1	0.189831	0.227905	-0.558945	0.138884	0.144047	-1.00978	MTSS1	0.101791	-1.45805	0.354018	0.340161	0.105827	-1.40195	0.182268	-0.6176	MTSS1	5.00235	17.3977	5.20072	8.95731
CCNB3	-1.36665	0.180542	1.36665	0.180542	CCNB3	CCNB3	85417	cyclin B3	CCNB3	0.481535	0.047898	-0.237521	-0.13434	CCNB3	3.4549	3.494	0.264717	2.528	2.52962	-0.185931	CCNB3	4.01518	0.481535	2.97281	0.047898	2.4392	-0.237521	2.62004	-0.13434	CCNB3	161.076	130.994	107.481	115.45
MLLT6	-1.36652	0.569644	1.36652	0.569644	MLLT6	MLLT6	4302	myeloid/lymphoid or mixed-lineage leukemia (trithorax homolog, Drosophila); translocated to, 6	MLLT6	0.420538	-0.0428903	0.365016	-0.888386	MLLT6	2.78404	2.82002	0.188824	2.03732	2.23258	-0.261685	MLLT6	3.2691	0.420538	2.37095	-0.0428903	3.14568	0.365016	1.31948	-0.888386	MLLT6	244.115	177.047	234.899	98.5304
PTPDC1	-1.3665	0.513733	1.3665	0.513733	PTPDC1	PTPDC1	138639	protein tyrosine phosphatase domain containing 1	PTPDC1	0.287171	0.176507	0.351083	-0.788371	PTPDC1	6.57648	6.58132	0.231839	4.81266	5.19283	-0.218644	PTPDC1	6.83361	0.287171	6.32903	0.176507	7.14315	0.351083	3.2425	-0.788371	PTPDC1	300.141	278.363	314.643	142.322
NCKAP1	-1.36646	0.427279	1.36646	0.427279	NCKAP1	NCKAP1	10787	NCK-associated protein 1	NCKAP1	-0.277078	0.601062	-0.411153	-0.165749	NCKAP1	112.011	117.239	0.161992	81.9719	82.2686	-0.288451	NCKAP1	82.6206	-0.277078	151.857	0.601062	75.2884	-0.411153	89.2487	-0.165749	NCKAP1	3727.75	6851.62	3396.93	4026.81
ZNF335	-1.36637	0.128041	1.36637	0.128041	ZNF335	ZNF335	63925	zinc finger protein 335	ZNF335	0.0868584	0.17003	-0.14801	-0.495796	ZNF335	8.64822	8.65181	0.128444	6.32934	6.37538	-0.321903	ZNF335	8.40249	0.0868584	8.90113	0.17003	7.14012	-0.14801	5.61063	-0.495796	ZNF335	365.172	386.843	310.309	243.838
PLA2G4C	-1.36617	0.778064	1.36617	0.778064	PLA2G4C	PLA2G4C	8605	phospholipase A2, group IVC (cytosolic, calcium-independent)	PLA2G4C	0.699109	-1.66068	-0.180317	-1.68154	PLA2G4C	0.391009	0.529229	-0.480787	0.286208	0.325827	-0.930928	PLA2G4C	0.885873	0.699109	0.172585	-1.66068	0.481546	-0.180317	0.170108	-1.68154	PLA2G4C	21.0099	4.09357	11.2682	3.98103
LOC440354	-1.36612	0.0607557	1.36612	0.0607557	LOC440354	LOC440354	440354	smg-1 homolog, phosphatidylinositol 3-kinase-related kinase (C. elegans) pseudogene	LOC440354	0.235513	0.0931082	-0.19381	-0.377745	LOC440354	0.887838	0.88892	0.164311	0.649896	0.651217	-0.285778	LOC440354	0.932756	0.235513	0.845084	0.0931082	0.692674	-0.19381	0.60976	-0.377745	LOC440354	35.0165	31.7252	26.0036	22.8909
CCDC122	-1.36567	0.334529	1.36567	0.334529	CCDC122	CCDC122	160857	coiled-coil domain containing 122	CCDC122	-0.256962	0.427796	-0.463893	-0.264499	CCDC122	0.963453	0.990712	0.0854171	0.705478	0.707163	-0.364196	CCDC122	0.759914	-0.256962	1.22151	0.427796	0.658373	-0.463893	0.755954	-0.264499	CCDC122	14.0066	22.5146	12.135	13.9336
ZNF554	-1.36503	0.339647	1.36503	0.339647	ZNF554	ZNF554	115196	zinc finger protein 554	ZNF554	0.65472	-0.0113274	0.0120947	-0.266562	ZNF554	4.68921	4.8147	0.321696	3.43525	3.45128	-0.127233	ZNF554	5.90677	0.65472	3.72263	-0.0113274	3.78356	0.0120947	3.11901	-0.266562	ZNF554	211.099	133.041	135.219	111.469
DCDC1	-1.36446	0.673122	1.36446	0.673122	DCDC1	DCDC1	341019	doublecortin domain containing 1	DCDC1	1.06718	-0.222066	0.625784	-0.677325	DCDC1	0.814832	0.897533	0.422555	0.597184	0.659129	-0.0257705	DCDC1	1.27385	1.06718	0.521216	-0.222066	0.938093	0.625784	0.380164	-0.677325	DCDC1	20.0094	8.18714	14.7354	5.97154
LOC139201	-1.36407	0.296639	1.36407	0.296639	LOC139201				LOC139201	-0.0529297	0.564716	-0.107849	-0.276196	LOC139201	1.86907	1.91206	0.255893	1.37022	1.37255	-0.192022	LOC139201	1.5089	-0.0529297	2.31521	0.564716	1.45254	-0.107849	1.29256	-0.276196	LOC139201	36.0169	55.2632	34.6714	30.853
RNF169	-1.36334	0.0183993	1.36334	0.0183993	RNF169	RNF169	254225	ring finger protein 169	RNF169	0.287284	0.250693	-0.236879	-0.119438	RNF169	3.33425	3.33452	0.268988	2.44564	2.44767	-0.178158	RNF169	3.3768	0.287284	3.29223	0.250693	2.3481	-0.236879	2.54724	-0.119438	RNF169	263.327	256.732	183.107	198.637
KCNQ1OT1	-1.36323	0.0249199	1.36323	0.0249199	KCNQ1OT1	KCNQ1OT1	10984	KCNQ1 opposite strand/antisense transcript 1 (non-protein coding)	KCNQ1OT1	-0.190231	-0.323561	-0.730903	-0.676938	KCNQ1OT1	0.289679	0.289989	-0.256896	0.212495	0.212532	-0.703921	KCNQ1OT1	0.303379	-0.190231	0.276598	-0.323561	0.208558	-0.730903	0.216507	-0.676938	KCNQ1OT1	184.087	167.836	126.551	131.374
NCK2	-1.36302	0.501996	1.36302	0.501996	NCK2	NCK2	8440	NCK adaptor protein 2	NCK2	-0.574977	0.49538	-0.614075	-0.359139	NCK2	25.2948	27.0553	-0.0397981	18.5579	18.6304	-0.486607	NCK2	17.4553	-0.574977	36.6553	0.49538	16.9886	-0.614075	20.2722	-0.359139	NCK2	347.163	741.96	351.048	397.107
SPOPL	-1.36229	0.414801	1.36229	0.414801	SPOPL	SPOPL	339745	speckle-type POZ protein-like	SPOPL	-0.284968	0.578592	-0.231704	-0.366732	SPOPL	8.08453	8.44932	0.146812	5.93453	5.94103	-0.299218	SPOPL	5.99344	-0.284968	10.9052	0.578592	6.21885	-0.231704	5.66321	-0.366732	SPOPL	339.159	617.106	351.915	320.473
SOCS4	-1.36202	0.318389	1.36202	0.318389	SOCS4	SOCS4	122809	suppressor of cytokine signaling 4	SOCS4	-0.144435	0.284492	-0.637422	-0.114008	SOCS4	7.62696	7.71138	0.0700285	5.59976	5.69215	-0.375715	SOCS4	6.57342	-0.144435	8.84935	0.284492	4.67076	-0.637422	6.71353	-0.114008	SOCS4	457.215	610.966	321.578	467.771
C22orf26	-1.36179	0.0477694	1.36179	0.0477694	C22orf26	C22orf26	55267	chromosome 22 open reading frame 26	C22orf26	0.366395	0.399075	-0.162465	0.0369275	C22orf26	0.303492	0.303511	0.382735	0.222863	0.223395	-0.0627686	C22orf26	0.300074	0.366395	0.306949	0.399075	0.207982	-0.162465	0.238808	0.0369275	C22orf26	5.00235	5.11697	3.46714	3.98103
LOC283335	-1.36071	0.543172	1.36071	0.543172	LOC283335	LOC283335	283335	uncharacterized LOC283335	LOC283335	-0.502418	0.558865	-0.111546	-0.720732	LOC283335	0.813556	0.869211	0.0282234	0.59789	0.611265	-0.416139	LOC283335	0.563182	-0.502418	1.17524	0.558865	0.738436	-0.111546	0.484094	-0.720732	LOC283335	15.3115	31.952	20.0763	13.1613
ZNF880	-1.3607	0.772516	1.3607	0.772516	ZNF880	ZNF880	400713	zinc finger protein 880	ZNF880	0.0414096	-0.617787	0.571443	-2.03652	ZNF880	0.794886	0.81572	-0.288188	0.584175	0.839488	-0.732537	ZNF880	0.998904	0.0414096	0.632537	-0.617787	1.44238	0.571443	0.236595	-2.03652	ZNF880	21.0099	13.3041	30.3375	4.97628
MED22	-1.36064	0.215103	1.36064	0.215103	MED22	MED22	6837	mediator complex subunit 22	MED22	-0.165024	0.328786	-0.385754	-0.339053	MED22	14.9507	15.1702	0.0818808	10.988	10.9894	-0.362403	MED22	12.599	-0.165024	17.7414	0.328786	10.8116	-0.385754	11.1673	-0.339053	MED22	463.218	629.387	405.656	419.003
RNF149	-1.36045	0.234278	1.36045	0.234278	RNF149	RNF149	284996	ring finger protein 149	RNF149	-0.0526792	0.289204	-0.124954	-0.526683	RNF149	71.6933	72.1971	0.118262	52.6984	53.2099	-0.325818	RNF149	63.6825	-0.0526792	80.7118	0.289204	60.5708	-0.124954	45.8491	-0.526683	RNF149	1799.85	2281.14	1711.9	1295.82
RNF214	-1.35977	0.0700355	1.35977	0.0700355	RNF214	RNF214	257160	ring finger protein 214	RNF214	0.420216	0.217315	-0.195788	-0.0533982	RNF214	8.75404	8.77569	0.318765	6.4379	6.44574	-0.124593	RNF214	9.39178	0.420216	8.1596	0.217315	6.12791	-0.195788	6.76357	-0.0533982	RNF214	239.112	207.749	156.021	172.179
RASGRF2	-1.3586	0.551826	1.3586	0.551826	RASGRF2	RASGRF2	5924	Ras protein-specific guanine nucleotide-releasing factor 2	RASGRF2	-0.238923	0.841076	0.170813	-0.452912	RASGRF2	0.268086	0.287086	0.301077	0.197325	0.201953	-0.141049	RASGRF2	0.184382	-0.238923	0.38979	0.841076	0.244941	0.170813	0.158965	-0.452912	RASGRF2	15.0071	31.7256	19.9361	12.9383
SCG2	-1.3586	0.176792	1.3586	0.176792	SCG2	SCG2	7857	secretogranin II	SCG2	0.362224	-0.0201278	-0.370775	-0.17138	SCG2	1.30319	1.31465	0.171048	0.95921	0.961501	-0.271077	SCG2	1.48784	0.362224	1.14145	-0.0201278	0.895162	-0.370775	1.02784	-0.17138	SCG2	36.0169	27.6316	21.6697	24.8814
DOLK	-1.3586	0.352702	1.3586	0.352702	DOLK	DOLK	22845	dolichol kinase	DOLK	-0.256498	0.472521	-0.282559	-0.385655	DOLK	35.858	37.0087	0.108012	26.3934	26.4103	-0.334107	DOLK	27.8521	-0.256498	46.1652	0.472521	27.3535	-0.282559	25.467	-0.385655	DOLK	569.268	943.568	559.077	520.519
CNNM2	-1.3586	0.218534	1.3586	0.218534	CNNM2	CNNM2	54805	cyclin M2	CNNM2	0.589923	0.209345	0.119056	-0.204025	CNNM2	5.50242	5.55035	0.399634	4.05007	4.07549	-0.0424846	CNNM2	6.27822	0.589923	4.82249	0.209345	4.52993	0.119056	3.62105	-0.204025	CNNM2	203.095	169.883	169.023	126.398
SMC5	-1.35841	0.118768	1.35841	0.118768	SMC5	SMC5	23137	structural maintenance of chromosomes 5	SMC5	0.0480854	0.340733	-0.165757	-0.329265	SMC5	11.795	11.8558	0.194409	8.68296	8.6969	-0.247511	SMC5	10.6574	0.0480854	13.0541	0.340733	9.18921	-0.165757	8.2046	-0.329265	SMC5	628.295	769.592	541.741	483.695
STBD1	-1.35823	0.296	1.35823	0.296	STBD1	STBD1	8987	starch binding domain 1	STBD1	-0.195551	0.234822	-0.191913	-0.652273	STBD1	8.76338	8.86104	0.0196357	6.45205	6.53435	-0.422093	STBD1	7.54908	-0.195551	10.173	0.234822	7.56814	-0.191913	5.50056	-0.652273	STBD1	212.044	285.747	212.579	154.504
ZNF429	-1.35696	0.187676	1.35696	0.187676	ZNF429	ZNF429	353088	zinc finger protein 429	ZNF429	0.169954	0.366341	0.0286173	-0.373075	ZNF429	12.5325	12.5616	0.268148	9.23574	9.32538	-0.172229	ZNF429	11.7079	0.169954	13.4152	0.366341	10.6153	0.0286173	8.03546	-0.373075	ZNF429	258.121	295.761	234.032	177.156
TFAMP1	-1.35683	0.386249	1.35683	0.386249	TFAMP1	TFAMP1	260341	transcription factor A, mitochondrial pseudogene 1	TFAMP1	0.266955	0.991517	0.359586	0.0184101	TFAMP1	0.810272	0.835954	0.629236	0.597181	0.601361	0.188998	TFAMP1	0.630338	0.266955	1.04157	0.991517	0.672138	0.359586	0.530584	0.0184101	TFAMP1	13.0061	21.4913	13.8686	10.9478
GGA1	-1.35655	0.0379984	1.35655	0.0379984	GGA1	GGA1	26088	golgi-associated, gamma adaptin ear containing, ARF binding protein 1	GGA1	0.0178427	0.167717	-0.300465	-0.393851	GGA1	18.16	18.1845	0.09278	13.3869	13.3939	-0.347158	GGA1	17.2408	0.0178427	19.1282	0.167717	13.8273	-0.300465	12.9606	-0.393851	GGA1	452.213	505.556	370.984	376.207
GFOD2	-1.35648	0.365708	1.35648	0.365708	GFOD2	GFOD2	81577	glucose-fructose oxidoreductase domain containing 2	GFOD2	-0.022392	0.575487	0.0698069	-0.396437	GFOD2	10.7744	11.0065	0.276548	7.94294	8.04687	-0.163315	GFOD2	8.75797	-0.022392	13.2551	0.575487	9.33594	0.0698069	6.75779	-0.396437	GFOD2	240.113	372.515	241.833	156.255
HNRNPU-AS1	-1.35614	0.717216	1.35614	0.717216	HNRNPU-AS1	HNRNPU-AS1	284702	HNRNPU antisense RNA 1	HNRNPU-AS1	1.05314	-0.532172	0.515878	-0.873914	HNRNPU-AS1	1.49076	1.72148	0.260484	1.09927	1.22927	-0.179018	HNRNPU-AS1	2.58238	1.05314	0.860585	-0.532172	1.77946	0.515878	0.679077	-0.873914	HNRNPU-AS1	127.912	42.627	88.1412	33.6365
ZNF91	-1.356	0.415796	1.356	0.415796	ZNF91	ZNF91	7644	zinc finger protein 91	ZNF91	0.13152	-0.213682	-0.0848505	-0.876019	ZNF91	7.68578	7.74084	-0.0410809	5.66799	5.8824	-0.480435	ZNF91	8.66255	0.13152	6.81914	-0.213682	7.4561	-0.0848505	4.3087	-0.876019	ZNF91	460.216	362.281	396.121	228.909
ZNF513	-1.35597	0.167192	1.35597	0.167192	ZNF513	ZNF513	130557	zinc finger protein 513	ZNF513	0.144042	0.390833	-0.00632762	-0.33745	ZNF513	1.42055	1.42575	0.267437	1.04763	1.05453	-0.171889	ZNF513	1.3041	0.144042	1.5474	0.390833	1.17502	-0.00632762	0.934044	-0.33745	ZNF513	25.0118	29.6784	22.5364	17.9146
C1orf96	-1.35459	0.399577	1.35459	0.399577	C1orf96	CCSAP	126731	centriole, cilia and spindle-associated protein	C1orf96	-0.224273	0.585001	-0.336954	-0.17804	C1orf96	6.23876	6.48576	0.180364	4.60563	4.61261	-0.257497	C1orf96	4.71292	-0.224273	8.25859	0.585001	4.35883	-0.336954	4.8664	-0.17804	C1orf96	237.111	415.498	219.297	244.833
C8orf42	-1.35449	0.35661	1.35449	0.35661	C8orf42	C8orf42	157695	chromosome 8 open reading frame 42	C8orf42	0.147301	0.179991	0.0938346	-0.64205	C8orf42	12.0482	12.049	0.163646	8.895	9.18586	-0.274108	C8orf42	11.9125	0.147301	12.1855	0.179991	11.4791	0.0938346	6.89262	-0.64205	C8orf42	392.184	401.17	377.919	226.919
SOSTDC1	-1.35429	0.556945	1.35429	0.556945	SOSTDC1	SOSTDC1	25928	sclerostin domain containing 1	SOSTDC1	0.115668	0.659848	0.514019	-0.613569	SOSTDC1	6.67694	6.79604	0.387758	4.93023	5.31151	-0.0497754	SOSTDC1	5.5293	0.115668	8.06278	0.659848	7.28762	0.514019	3.3354	-0.613569	SOSTDC1	94.0442	137.135	123.95	56.7296
OBSL1	-1.35404	0.313171	1.35404	0.313171	OBSL1	OBSL1	23363	obscurin-like 1	OBSL1	0.326281	-0.00603135	0.00472514	-0.559025	OBSL1	10.7549	10.8263	0.160125	7.9428	8.09488	-0.27715	OBSL1	12.0677	0.326281	9.58492	-0.00603135	9.65665	0.00472514	6.53312	-0.559025	OBSL1	461.217	401.17	370.984	258.767
STMN3	-1.35401	0.797851	1.35401	0.797851	STMN3	STMN3	50861	stathmin-like 3	STMN3	-1.43947	1.19903	-1.26681	0.151893	STMN3	12.2676	17.7641	-0.120218	9.06017	10.1776	-0.557458	STMN3	4.91614	-1.43947	30.6121	1.19903	5.54115	-1.26681	14.814	0.151893	STMN3	103.048	641.667	116.149	310.52
ST3GAL1	-1.35383	0.506882	1.35383	0.506882	ST3GAL1	ST3GAL1	6482	ST3 beta-galactoside alpha-2,3-sialyltransferase 1	ST3GAL1	-0.13473	0.953251	0.00862753	-0.0642003	ST3GAL1	0.825988	0.885406	0.409261	0.610112	0.610306	-0.0277864	ST3GAL1	0.566521	-0.13473	1.20429	0.953251	0.625707	0.00862753	0.594905	-0.0642003	ST3GAL1	39.0183	82.8948	42.4725	40.8055
EHD3	-1.35375	0.421977	1.35375	0.421977	EHD3	EHD3	30845	EH-domain containing 3	EHD3	-0.683761	-0.165653	-1.21262	-0.510726	EHD3	0.474241	0.481907	-0.424707	0.350316	0.360732	-0.861672	EHD3	0.396293	-0.683761	0.567522	-0.165653	0.274672	-1.21262	0.446792	-0.510726	EHD3	15.0071	21.4913	10.4014	16.9194
SRXN1	-1.35367	0.293519	1.35367	0.293519	SRXN1	SRXN1	140809	sulfiredoxin 1	SRXN1	-0.295244	0.305975	-0.505	-0.358015	SRXN1	156.329	159.735	0.00536537	115.486	115.635	-0.431507	SRXN1	126.925	-0.295244	192.545	0.305975	109.75	-0.505	121.521	-0.358015	SRXN1	3063.44	4647.23	2648.9	2933.02
LRRIQ3	-1.35354	0.497745	1.35354	0.497745	LRRIQ3	LRRIQ3	127255	leucine-rich repeats and IQ motif containing 3	LRRIQ3	-0.18948	0.64206	-0.54184	0.120951	LRRIQ3	3.58493	3.73483	0.22629	2.64856	2.71875	-0.210445	LRRIQ3	2.68733	-0.18948	4.78233	0.64206	2.10499	-0.54184	3.3325	0.120951	LRRIQ3	73.0343	129.971	57.2079	90.5684
LOC440925	-1.3532	0.58722	1.3532	0.58722	LOC440925	LOC440925	440925	uncharacterized LOC440925	LOC440925	-0.275737	0.171983	0.154764	-1.13127	LOC440925	0.534577	0.541026	-0.0518769	0.395047	0.434939	-0.488252	LOC440925	0.457743	-0.275737	0.624308	0.171983	0.616901	0.154764	0.252977	-1.13127	LOC440925	9.00423	12.2807	12.135	4.97628
PPM1A	-1.35317	0.176459	1.35317	0.176459	PPM1A	PPM1A	5494	protein phosphatase, Mg2+/Mn2+ dependent, 1A	PPM1A	-0.0463822	0.154321	-0.195033	-0.569706	PPM1A	8.08573	8.10529	0.0539696	5.97541	6.02586	-0.38237	PPM1A	7.54241	-0.0463822	8.66818	0.154321	6.80396	-0.195033	5.24776	-0.569706	PPM1A	487.229	552.632	430.793	334.406
PPP1R8	-1.35314	0.265731	1.35314	0.265731	PPP1R8	PPP1R8	5511	protein phosphatase 1, regulatory subunit 8	PPP1R8	0.00715621	0.370507	-0.0275842	-0.467373	PPP1R8	28.3924	28.6179	0.188831	20.9826	21.2268	-0.247478	PPP1R8	25.033	0.00715621	32.2027	0.370507	24.4374	-0.0275842	18.0163	-0.467373	PPP1R8	560.263	720.469	548.676	402.084
IRF2BPL	-1.35285	0.41196	1.35285	0.41196	IRF2BPL	IRF2BPL	64207	interferon regulatory factor 2 binding protein-like	IRF2BPL	0.201974	-0.156666	-0.0290712	-0.797614	IRF2BPL	3.96263	3.99328	0.0226539	2.92911	3.03363	-0.413343	IRF2BPL	4.48708	0.201974	3.49947	-0.156666	3.82307	-0.0290712	2.24418	-0.797614	IRF2BPL	181.085	141.228	154.288	90.5684
LOC100130015	-1.35199	0.418667	1.35199	0.418667	LOC100130015	LOC100130015	100130015	5-hydroxyisourate hydrolase pseudogene	LOC100130015	0.664679	0.64845	0.652009	-0.209045	LOC100130015	4.49906	4.49913	0.656565	3.32774	3.47702	0.221482	LOC100130015	4.52444	0.664679	4.47383	0.64845	4.48488	0.652009	2.46915	-0.209045	LOC100130015	53.0141	53.1106	52.8721	28.9498
SMG6	-1.35176	0.257707	1.35176	0.257707	SMG6	SMG6	23293	smg-6 homolog, nonsense mediated mRNA decay factor (C. elegans)	SMG6	0.217641	-0.0130952	-0.585019	-0.0801149	SMG6	3.96315	3.97583	0.102273	2.93184	2.97684	-0.332567	SMG6	4.29309	0.217641	3.65857	-0.0130952	2.46119	-0.585019	3.4925	-0.0801149	SMG6	267.126	220.029	146.487	207.013
FAM86HP	-1.35172	0.62751	1.35172	0.62751	FAM86HP	FAM86HP	729375	family with sequence similarity 86, member A pseudogene	FAM86HP	-0.254761	0.247406	-1.16213	0.285188	FAM86HP	0.792238	0.804266	-0.00367752	0.586098	0.661389	-0.438471	FAM86HP	0.66569	-0.254761	0.942843	0.247406	0.354917	-1.16213	0.967861	0.285188	FAM86HP	13.0061	18.4211	6.93429	18.9099
TCEB3	-1.35157	0.192339	1.35157	0.192339	TCEB3	TCEB3	6924	transcription elongation factor B (SIII), polypeptide 3 (110kDa, elongin A)	TCEB3	0.10878	-0.202165	-0.643113	-0.319551	TCEB3	2.06513	2.07713	-0.0466923	1.52794	1.53756	-0.481332	TCEB3	2.30011	0.10878	1.85415	-0.202165	1.36586	-0.643113	1.70926	-0.319551	TCEB3	111.528	89.9043	66.2281	82.8786
EAPP	-1.35135	0.225839	1.35135	0.225839	EAPP	EAPP	55837	E2F-associated phosphoprotein	EAPP	-0.101951	0.346692	-0.199076	-0.424989	EAPP	39.2496	39.7251	0.122371	29.0447	29.1338	-0.312032	EAPP	33.5976	-0.101951	45.8525	0.346692	31.4102	-0.199076	26.8574	-0.424989	EAPP	392.184	535.235	366.651	313.506
TXNDC16	-1.3513	0.573825	1.3513	0.573825	TXNDC16	TXNDC16	57544	thioredoxin domain containing 16	TXNDC16	0.605456	-0.212793	0.269577	-0.745614	TXNDC16	4.46464	4.64536	0.196331	3.30395	3.51057	-0.238018	TXNDC16	5.9285	0.605456	3.36223	-0.212793	4.69716	0.269577	2.32398	-0.745614	TXNDC16	269.127	152.486	213.229	105.497
DIS3L2	-1.35118	0.297434	1.35118	0.297434	DIS3L2	DIS3L2	129563	DIS3 mitotic control homolog (S. cerevisiae)-like 2	DIS3L2	-0.160108	0.421317	-0.193143	-0.414084	DIS3L2	8.78009	8.95895	0.130604	6.4981	6.51716	-0.303614	DIS3L2	7.17771	-0.160108	10.7402	0.421317	7.01522	-0.193143	6.0191	-0.414084	DIS3L2	242.114	362.281	236.633	203.032
C21orf58	-1.35115	0.460797	1.35115	0.460797	C21orf58	C21orf58	54058	chromosome 21 open reading frame 58	C21orf58	-0.116117	0.840615	-0.038597	-0.105279	C21orf58	3.84668	4.06008	0.362249	2.84697	2.84773	-0.0719381	C21orf58	2.76111	-0.116117	5.35906	0.840615	2.91353	-0.038597	2.78193	-0.105279	C21orf58	78.0367	151.462	82.3447	78.6253
CCDC57	-1.35066	0.548277	1.35066	0.548277	CCDC57	CCDC57	284001	coiled-coil domain containing 57	CCDC57	0.870512	0.199182	0.605286	-0.402921	CCDC57	2.80366	2.87988	0.534847	2.07577	2.20378	0.101182	CCDC57	3.5381	0.870512	2.22167	0.199182	2.94394	0.605286	1.46362	-0.402921	CCDC57	101.048	63.4504	84.0783	41.8008
FAM60A	-1.35056	0.295286	1.35056	0.295286	FAM60A	FAM60A	58516	family with sequence similarity 60, member A	FAM60A	-0.186693	0.181505	-0.188417	-0.683883	FAM60A	41.4656	41.8037	-0.00259383	30.7026	31.1563	-0.43615	FAM60A	36.498	-0.186693	47.1094	0.181505	36.4544	-0.188417	25.8583	-0.683883	FAM60A	1061.5	1367.25	1056.61	755.4
LIPH	-1.35045	0.291759	1.35045	0.291759	LIPH	LIPH	200879	lipase, member H	LIPH	0.553616	0.223727	0.212383	-0.301924	LIPH	1.73062	1.74195	0.388672	1.28151	1.30192	-0.0447704	LIPH	1.94024	0.553616	1.54365	0.223727	1.53156	0.212383	1.07229	-0.301924	LIPH	45.0212	35.8188	35.5382	24.8814
TOX	-1.35038	0.548297	1.35038	0.548297	TOX	TOX	9760	thymocyte selection-associated high mobility group box	TOX	0.4377	-0.470238	-0.0493342	-0.849942	TOX	2.16352	2.27152	-0.0162687	1.60215	1.66423	-0.449638	TOX	2.9636	0.4377	1.57944	-0.470238	2.1145	-0.0493342	1.21395	-0.849942	TOX	119.056	63.4504	84.945	48.7676
ZNF707	-1.35004	0.334571	1.35004	0.334571	ZNF707	ZNF707	286075	zinc finger protein 707	ZNF707	-0.142426	0.378429	-0.0910715	-0.538927	ZNF707	3.3769	3.43207	0.118001	2.50133	2.53153	-0.314999	ZNF707	2.81917	-0.142426	4.04496	0.378429	2.92133	-0.0910715	2.14172	-0.538927	ZNF707	56.0263	82.8948	58.9415	41.8008
HERC3	-1.34978	0.319313	1.34978	0.319313	HERC3	HERC3	8916	HECT and RLD domain containing E3 ubiquitin protein ligase 3	HERC3	0.503405	0.0160811	0.0485411	-0.39451	HERC3	1.33829	1.35743	0.259743	0.991487	1.0032	-0.172984	HERC3	1.58453	0.503405	1.13032	0.0160811	1.15604	0.0485411	0.850357	-0.39451	HERC3	76.0357	54.2398	55.4743	40.8055
GDF11	-1.34972	0.553226	1.34972	0.553226	GDF11	GDF11	10220	growth differentiation factor 11	GDF11	-0.177795	0.888267	-0.379389	0.224547	GDF11	0.921853	0.985492	0.355236	0.682997	0.698013	-0.0774211	GDF11	0.637094	-0.177795	1.33389	0.888267	0.55401	-0.379389	0.842016	0.224547	GDF11	26.4354	55.3483	22.9879	34.9384
NUP188	-1.34962	0.520948	1.34962	0.520948	NUP188	NUP188	23511	nucleoporin 188kDa	NUP188	-0.333946	0.717622	-0.434755	-0.0466812	NUP188	56.4838	60.2766	0.191838	41.8515	42.2306	-0.240718	NUP188	39.2326	-0.333946	81.3206	0.717622	36.5848	-0.434755	47.8765	-0.0466812	NUP188	2202.04	4564.33	2053.42	2687.19
YPEL1	-1.34959	0.552845	1.34959	0.552845	YPEL1	YPEL1	29799	yippee-like 1 (Drosophila)	YPEL1	0.494429	0.734287	0.781743	-0.418062	YPEL1	3.45794	3.4699	0.614358	2.56222	2.78694	0.18184	YPEL1	3.18211	0.494429	3.75768	0.734287	3.88334	0.781743	1.69055	-0.418062	YPEL1	132.82	156.844	162.089	70.5629
ZSWIM5	-1.34956	0.0435221	1.34956	0.0435221	ZSWIM5	ZSWIM5	57643	zinc finger, SWIM-type containing 5	ZSWIM5	-0.0245243	0.125991	-0.326613	-0.436906	ZSWIM5	1.71916	1.7215	0.0507333	1.27386	1.27479	-0.381759	ZSWIM5	1.63178	-0.0245243	1.81122	0.125991	1.3235	-0.326613	1.22609	-0.436906	ZSWIM5	94.0442	104.386	76.2772	70.6632
NFKBIL1	-1.3495	0.260825	1.3495	0.260825	NFKBIL1	NFKBIL1	4795	nuclear factor of kappa light polypeptide gene enhancer in B-cells inhibitor-like 1	NFKBIL1	0.19405	0.143654	0.0138949	-0.541037	NFKBIL1	15.873	15.8755	0.168852	11.7622	11.9804	-0.263571	NFKBIL1	16.1527	0.19405	15.5982	0.143654	14.2565	0.0138949	9.70425	-0.541037	NFKBIL1	208.098	196.491	181.158	121.421
RG9MTD3	-1.34941	0.123071	1.34941	0.123071	RG9MTD3	TRMT10B	158234	tRNA methyltransferase 10 homolog B (S. cerevisiae)	RG9MTD3	0.315404	0.0136688	-0.194916	-0.34066	RG9MTD3	4.89599	4.92279	0.164537	3.62826	3.63288	-0.267788	RG9MTD3	5.43571	0.315404	4.40986	0.0136688	3.81623	-0.194916	3.44954	-0.34066	RG9MTD3	116.055	94.1522	81.4779	73.649
AGAP1	-1.34895	0.533518	1.34895	0.533518	AGAP1	AGAP1	116987	ArfGAP with GTPase domain, ankyrin repeat and PH domain 1	AGAP1	-0.708337	0.354497	-0.838648	-0.378871	AGAP1	1.4817	1.58336	-0.17692	1.09841	1.11238	-0.60876	AGAP1	1.02515	-0.708337	2.14157	0.354497	0.936612	-0.838648	1.28815	-0.378871	AGAP1	110.052	119.737	100.547	98.5304
SFT2D3	-1.34874	0.535632	1.34874	0.535632	SFT2D3	SFT2D3	84826	SFT2 domain containing 3	SFT2D3	0.0335691	0.261344	0.286664	-0.854979	SFT2D3	8.97636	9.00435	0.147456	6.65536	7.18314	-0.284158	SFT2D3	8.29501	0.0335691	9.71368	0.261344	9.88567	0.286664	4.48061	-0.854979	SFT2D3	221.104	258.918	263.503	119.431
ZNF692	-1.34873	0.540416	1.34873	0.540416	ZNF692	ZNF692	55657	zinc finger protein 692	ZNF692	0.3632	0.102054	0.376157	-0.774099	ZNF692	21.3445	21.432	0.232627	15.8256	17.0999	-0.198971	ZNF692	23.3664	0.3632	19.4975	0.102054	23.5772	0.376157	10.6226	-0.774099	ZNF692	415.195	344.883	429.059	190.094
FMN1	-1.34842	0.20879	1.34842	0.20879	FMN1	FMN1	342184	formin 1	FMN1	0.197311	0.658837	0.0448284	-0.0512302	FMN1	0.245387	0.248533	0.428074	0.181981	0.182081	-0.00320087	FMN1	0.209115	0.197311	0.287951	0.658837	0.188141	0.0448284	0.176022	-0.0512302	FMN1	26.0122	35.8188	23.4032	21.8956
USP32	-1.34839	0.00961765	1.34839	0.00961765	USP32	USP32	84669	ubiquitin specific peptidase 32	USP32	0.165823	0.0857791	-0.320036	-0.290848	USP32	10.9408	10.9451	0.125801	8.11397	8.11439	-0.305442	USP32	11.2486	0.165823	10.6415	0.0857791	8.03231	-0.320036	8.19647	-0.290848	USP32	785.369	742.983	560.811	572.273
RBM41	-1.34814	0.182241	1.34814	0.182241	RBM41	RBM41	55285	RNA binding motif protein 41	RBM41	0.608828	0.390503	0.253324	-0.115928	RBM41	18.4293	18.4821	0.499665	13.6702	13.7823	0.0686979	RBM41	19.8779	0.608828	17.0863	0.390503	15.5365	0.253324	12.0281	-0.115928	RBM41	587.276	489.182	461.13	325.449
DMPK	-1.34778	0.598479	1.34778	0.598479	DMPK	DMPK	1760	dystrophia myotonica-protein kinase	DMPK	0.528998	-0.423738	0.12739	-0.883294	DMPK	1.05682	1.11496	0.0526303	0.784122	0.832719	-0.377952	DMPK	1.47029	0.528998	0.759628	-0.423738	1.11303	0.12739	0.552409	-0.883294	DMPK	43.0202	23.538	31.2043	14.9288
MFHAS1	-1.34762	0.34201	1.34762	0.34201	MFHAS1	MFHAS1	9258	malignant fibrous histiocytoma amplified sequence 1	MFHAS1	-0.0103691	0.335877	0.0345752	-0.569892	MFHAS1	3.77586	3.80308	0.162754	2.80188	2.86359	-0.267659	MFHAS1	3.34889	-0.0103691	4.25727	0.335877	3.45486	0.0345752	2.27231	-0.569892	MFHAS1	173.081	220.029	178.558	117.44
GTPBP2	-1.3475	0.494064	1.3475	0.494064	GTPBP2	GTPBP2	54676	GTP binding protein 2	GTPBP2	0.300451	-0.120525	0.133781	-0.814421	GTPBP2	16.1501	16.3223	0.0899627	11.9852	12.6382	-0.34032	GTPBP2	18.6869	0.300451	13.9576	-0.120525	16.6481	0.133781	8.62834	-0.814421	GTPBP2	530.249	396.053	472.398	244.833
EVPL	-1.34737	0.321936	1.34737	0.321936	EVPL	EVPL	2125	envoplakin	EVPL	0.274384	0.767909	0.309656	-0.127653	EVPL	6.76019	6.85931	0.521147	5.01732	5.07506	0.0910016	EVPL	5.69739	0.274384	8.02124	0.767909	5.8384	0.309656	4.31172	-0.127653	EVPL	372.175	523.977	381.386	281.658
C14orf105	-1.34721	0.404668	1.34721	0.404668	C14orf105	C14orf105	55195	chromosome 14 open reading frame 105	C14orf105	0.045217	0.602735	0.195118	-0.407105	C14orf105	20.1661	20.5437	0.323976	14.9688	15.2961	-0.105994	C14orf105	16.6229	0.045217	24.4645	0.602735	18.443	0.195118	12.1491	-0.407105	C14orf105	392.184	577.194	435.127	286.634
MSTO2P	-1.34693	0.684986	1.34693	0.684986	MSTO2P	MSTO2P	100129405	misato homolog 2 pseudogene	MSTO2P	0.672746	-0.38676	0.459824	-1.03318	MSTO2P	1.8277	1.95231	0.142993	1.35694	1.54269	-0.286678	MSTO2P	2.63862	0.672746	1.266	-0.38676	2.27657	0.459824	0.808802	-1.03318	MSTO2P	62.5773	30.0245	53.9911	19.1815
CHMP4C	-1.34692	0.338189	1.34692	0.338189	CHMP4C	CHMP4C	92421	charged multivesicular body protein 4C	CHMP4C	0.29492	0.49937	0.296101	-0.36114	CHMP4C	11.1477	11.1756	0.397145	8.2764	8.49204	-0.0325195	CHMP4C	10.3851	0.29492	11.9662	0.49937	10.3936	0.296101	6.59048	-0.36114	CHMP4C	174.082	200.585	174.224	110.473
FAM117B	-1.34687	0.309881	1.34687	0.309881	FAM117B	FAM117B	150864	family with sequence similarity 117, member B	FAM117B	0.13609	0.194372	0.052845	-0.581607	FAM117B	7.0044	7.00583	0.165231	5.2005	5.32672	-0.264381	FAM117B	6.86434	0.13609	7.14732	0.194372	6.47947	0.052845	4.17398	-0.581607	FAM117B	391.184	407.31	369.251	237.866
RAD51B	-1.34674	0.185525	1.34674	0.185525	RAD51B	RAD51B	5890	RAD51 homolog B (S. cerevisiae)	RAD51B	0.108522	0.374452	-0.35862	-0.0173393	RAD51B	9.52792	9.56842	0.241487	7.07483	7.12438	-0.18798	RAD51B	8.68904	0.108522	10.4478	0.374452	6.28562	-0.35862	7.96313	-0.0173393	RAD51B	155.073	169.883	105.748	129.383
DNM1	-1.34673	0.39842	1.34673	0.39842	DNM1	DNM1	1759	dynamin 1	DNM1	0.362137	0.107369	0.187879	-0.577287	DNM1	11.6898	11.7354	0.234753	8.68016	8.98716	-0.194704	DNM1	12.7689	0.362137	10.7019	0.107369	11.3161	0.187879	6.65823	-0.577287	DNM1	393.185	329.536	348.45	205.023
CCDC28A	-1.34616	0.23545	1.34615	0.23545	CCDC28A	CCDC28A	25901	coiled-coil domain containing 28A	CCDC28A	0.13301	0.296399	0.0281057	-0.456385	CCDC28A	18.6245	18.6544	0.214705	13.8354	14.0308	-0.21414	CCDC28A	17.5992	0.13301	19.7096	0.296399	16.3649	0.0281057	11.6968	-0.456385	CCDC28A	232.109	259.942	215.83	154.265
ACVR1	-1.3459	0.384645	1.3459	0.384645	ACVR1	ACVR1	90	activin A receptor, type I	ACVR1	-0.184214	0.453707	-0.072565	-0.515075	ACVR1	11.8847	12.1763	0.134746	8.8303	8.93435	-0.29382	ACVR1	9.52731	-0.184214	14.8253	0.453707	10.2939	-0.072565	7.5748	-0.515075	ACVR1	259.122	403.217	279.972	206.018
SRP54	-1.34567	0.498527	1.34567	0.498527	SRP54	SRP54	6729	signal recognition particle 54kDa	SRP54	-0.555232	0.45691	-0.607585	-0.347377	SRP54	44.9797	47.7756	-0.049161	33.4256	33.5617	-0.477481	SRP54	31.6719	-0.555232	63.8792	0.45691	30.5432	-0.607585	36.5801	-0.347377	SRP54	672.316	1356	648.356	774.31
LCA5	-1.34522	0.0855383	1.34522	0.0855383	LCA5	LCA5	167691	Leber congenital amaurosis 5	LCA5	0.296491	0.131569	-0.108344	-0.319278	LCA5	2.64782	2.65214	0.21403	1.96832	1.97358	-0.213811	LCA5	2.80357	0.296491	2.50072	0.131569	2.1176	-0.108344	1.82956	-0.319278	LCA5	125.059	111.55	95.3465	81.611
ZCCHC6	-1.34521	0.0695174	1.34521	0.0695174	ZCCHC6	ZCCHC6	79670	zinc finger, CCHC domain containing 6	ZCCHC6	0.00685986	0.231481	-0.348312	-0.26901	ZCCHC6	10.9148	10.9478	0.119171	8.1138	8.11686	-0.308661	ZCCHC6	10.0973	0.00685986	11.7984	0.231481	7.89383	-0.348312	8.33989	-0.26901	ZCCHC6	564.265	661.112	440.327	465.78
MORN4	-1.34487	0.17499	1.34487	0.17499	MORN4	MORN4	118812	MORN repeat containing 4	MORN4	0.137163	0.548155	-0.0595299	-0.110077	MORN4	16.0669	16.2302	0.342659	11.9469	11.9487	-0.0848034	MORN4	13.9339	0.137163	18.5265	0.548155	12.158	-0.0595299	11.7394	-0.110077	MORN4	313.147	412.427	275.638	264.738
CC2D1B	-1.34467	0.134782	1.34467	0.134782	CC2D1B	CC2D1B	200014	coiled-coil and C2 domain containing 1B	CC2D1B	-0.0382419	0.311781	-0.285816	-0.29514	CC2D1B	5.10381	5.1414	0.136769	3.7956	3.79562	-0.290478	CC2D1B	4.52075	-0.0382419	5.76206	0.311781	3.80788	-0.285816	3.78335	-0.29514	CC2D1B	252.119	321.345	212.363	210.994
PKN1	-1.34388	0.691087	1.34388	0.691087	PKN1	PKN1	5585	protein kinase N1	PKN1	0.61874	-0.18959	0.623882	-1.04754	PKN1	3.23411	3.36185	0.214575	2.40654	2.82173	-0.211831	PKN1	4.27977	0.61874	2.44393	-0.18959	4.29505	0.623882	1.3484	-1.04754	PKN1	121.057	69.5907	121.35	37.8198
RRAGB	-1.34354	0.53503	1.34354	0.53503	RRAGB	RRAGB	10325	Ras-related GTP binding B	RRAGB	0.608786	-0.0845607	0.293064	-0.620918	RRAGB	22.3711	23.0201	0.262113	16.6508	17.4932	-0.163927	RRAGB	28.4476	0.608786	17.5925	-0.0845607	22.8562	0.293064	12.1302	-0.620918	RRAGB	559.263	345.907	448.995	237.866
ATN1	-1.34314	0.347874	1.34314	0.347874	ATN1	ATN1	1822	atrophin 1	ATN1	-0.18864	0.50296	-0.32158	-0.21531	ATN1	2.28131	2.34716	0.15716	1.6985	1.69965	-0.268445	ATN1	1.7951	-0.18864	2.89922	0.50296	1.63708	-0.32158	1.76222	-0.21531	ATN1	76.0357	122.807	69.3429	74.6442
STK25	-1.34313	0.280626	1.34313	0.280626	STK25	STK25	10494	serine/threonine kinase 25	STK25	-0.150791	0.200481	-0.16925	-0.63226	STK25	64.2243	64.7008	0.024845	47.8168	48.4338	-0.400755	STK25	56.8627	-0.150791	72.5389	0.200481	56.1398	-0.16925	40.7278	-0.63226	STK25	1125.53	1435.82	1111.22	806.158
LOC100302650	-1.34306	0.696454	1.34306	0.696454	LOC100302650				LOC100302650	-0.346213	0.409162	-1.25974	0.471634	LOC100302650	1.14999	1.18962	0.0314745	0.856242	1.01507	-0.394053	LOC100302650	0.885111	-0.346213	1.49413	0.409162	0.469893	-1.25974	1.56025	0.471634	LOC100302650	13.1508	22.1994	6.98158	23.1819
ADD3	-1.34296	0.480932	1.34296	0.480932	ADD3	ADD3	120	adducin 3 (gamma)	ADD3	-0.52993	0.438523	-0.366755	-0.575491	ADD3	37.3165	39.4382	-0.0457032	27.7867	27.8594	-0.471123	ADD3	26.6768	-0.52993	52.1996	0.438523	29.8713	-0.366755	25.8475	-0.575491	ADD3	1115.52	2188.99	1251.54	1076.85
HIC2	-1.34272	0.199467	1.34272	0.199467	HIC2	HIC2	23119	hypermethylated in cancer 2	HIC2	0.0542862	0.485517	-0.219756	-0.0907552	HIC2	0.378845	0.383084	0.269901	0.282147	0.28243	-0.155255	HIC2	0.326253	0.0542862	0.439914	0.485517	0.269811	-0.219756	0.295048	-0.0907552	HIC2	22.0103	29.6784	18.2025	19.9051
SH3BP4	-1.34253	0.322325	1.34253	0.322325	SH3BP4	SH3BP4	23677	SH3-domain binding protein 4	SH3BP4	-0.0353074	0.611836	-0.0964136	-0.176972	SH3BP4	29.343	30.0842	0.288264	21.8565	21.865	-0.136693	SH3BP4	23.4477	-0.0353074	36.7206	0.611836	22.4753	-0.0964136	21.2547	-0.176972	SH3BP4	1194.56	1870.76	1145.02	1082.84
ACACB	-1.34246	0.214618	1.34246	0.214618	ACACB	ACACB	32	acetyl-CoA carboxylase beta	ACACB	0.197811	0.263659	0.0403491	-0.428636	ACACB	0.950772	0.95102	0.230735	0.708231	0.717607	-0.194144	ACACB	0.92932	0.197811	0.972719	0.263659	0.833229	0.0403491	0.601985	-0.428636	ACACB	86.0405	90.0586	77.144	55.7344
CCNG2	-1.34236	0.366205	1.34236	0.366205	CCNG2	CCNG2	901	cyclin G2	CCNG2	-0.0511214	0.347132	0.0309995	-0.584535	CCNG2	12.481	12.6	0.148005	9.29778	9.51014	-0.276768	CCNG2	10.8719	-0.0511214	14.3282	0.347132	11.5087	0.0309995	7.51159	-0.584535	CCNG2	586.276	772.662	620.619	405.069
MTRNR2L3	-1.34219	0.672585	1.34219	0.672585	MTRNR2L3	MTRNR2L3	100462983	MT-RNR2-like 3	MTRNR2L3	1.46703	-0.265819	0.172642	0.179388	MTRNR2L3	0.775383	0.919466	0.600606	0.577699	0.5777	0.176015	MTRNR2L3	1.41363	1.46703	0.425301	-0.265819	0.57635	0.172642	0.579051	0.179388	MTRNR2L3	17.008	5.11697	6.93429	6.9668
BEST3	-1.34193	0.758013	1.34193	0.758013	BEST3	BEST3	144453	bestrophin 3	BEST3	-0.384307	1.10781	-1.00628	0.881173	BEST3	0.736469	0.837157	0.361752	0.548815	0.670481	-0.0625517	BEST3	0.439105	-0.384307	1.23521	1.10781	0.285323	-1.00628	1.05564	0.881173	BEST3	12.0056	33.772	7.80107	28.8624
HERC2P9	-1.34192	0.591502	1.34192	0.591502	HERC2P9	HERC2P9	440248	hect domain and RLD 2 pseudogene 9	HERC2P9	0.243533	0.138712	0.435154	-0.901508	HERC2P9	1.5135	1.51449	0.191123	1.12786	1.25106	-0.233177	HERC2P9	1.56949	0.243533	1.4595	0.138712	1.79243	0.435154	0.709687	-0.901508	HERC2P9	44.0207	40.9357	50.2736	19.9051
ANXA1	-1.34177	0.605635	1.34177	0.605635	ANXA1	ANXA1	301	annexin A1	ANXA1	-1.20434	0.109609	-1.2098	-0.733206	ANXA1	237.366	262.406	-0.547366	176.905	179.323	-0.971505	ANXA1	150.539	-1.20434	374.272	0.109609	149.97	-1.2098	208.677	-0.733206	ANXA1	1835.86	4564.33	1828.92	2544.87
ASXL2	-1.34163	0.17682	1.34163	0.17682	ASXL2	ASXL2	55252	additional sex combs like 2 (Drosophila)	ASXL2	0.292081	0.0325806	-0.100643	-0.422678	ASXL2	3.07648	3.08893	0.162331	2.29308	2.30738	-0.261661	ASXL2	3.36599	0.292081	2.81187	0.0325806	2.56384	-0.100643	2.05092	-0.422678	ASXL2	240.113	200.585	182.892	146.303
CYP39A1	-1.34151	0.69003	1.34151	0.69003	CYP39A1	CYP39A1	51302	cytochrome P450, family 39, subfamily A, polypeptide 1	CYP39A1	-0.902566	0.930804	-0.478732	-0.340738	CYP39A1	2.77017	3.34844	0.014119	2.06497	2.06734	-0.409735	CYP39A1	1.46743	-0.902566	5.22946	0.930804	1.96854	-0.478732	2.16613	-0.340738	CYP39A1	31.0146	110.526	41.6057	45.7818
SAMD13	-1.34108	0.150426	1.34108	0.150426	SAMD13	SAMD13	148418	sterile alpha motif domain containing 13	SAMD13	0.121441	0.48801	-0.14962	-0.0877257	SAMD13	2.13172	2.14895	0.304726	1.58955	1.58992	-0.118673	SAMD13	1.8774	0.121441	2.4205	0.48801	1.55582	-0.14962	1.62402	-0.0877257	SAMD13	23.0108	30.7018	19.0693	19.9051
LOC642846	-1.34101	0.452343	1.34101	0.452343	LOC642846	LOC642846	642846	DEAD/H (Asp-Glu-Ala-Asp/His) box polypeptide 11-like	LOC642846	0.194697	0.141226	0.201176	-0.711903	LOC642846	2.01079	2.01113	0.167962	1.49945	1.57516	-0.255364	LOC642846	2.0484	0.194697	1.97387	0.141226	2.05762	0.201176	1.0927	-0.711903	LOC642846	69.0325	66.5205	69.3429	36.8245
PHF12	-1.34098	0.201697	1.34098	0.201697	PHF12	PHF12	57649	PHD finger protein 12	PHF12	0.0859342	0.140459	-0.0859377	-0.534243	PHF12	7.49232	7.49366	0.113197	5.5872	5.65477	-0.310091	PHF12	7.35207	0.0859342	7.63525	0.140459	6.52636	-0.0859377	4.78319	-0.534243	PHF12	311.146	333.626	285.173	209.004
APAF1	-1.34052	0.131634	1.34052	0.131634	APAF1	APAF1	317	apoptotic peptidase activating factor 1	APAF1	-0.0588315	0.281669	-0.298501	-0.324248	APAF1	7.55141	7.60405	0.111419	5.63319	5.63342	-0.311375	APAF1	6.71085	-0.0588315	8.49725	0.281669	5.68368	-0.298501	5.58315	-0.324248	APAF1	451.383	607.578	391.039	399.235
NUFIP2	-1.34043	0.241257	1.34043	0.241257	NUFIP2	NUFIP2	57532	nuclear fragile X mental retardation protein interacting protein 2	NUFIP2	0.0455177	0.0967529	-0.0962402	-0.606876	NUFIP2	10.0827	10.0843	0.0711353	7.52198	7.64007	-0.351558	NUFIP2	9.90521	0.0455177	10.2633	0.0967529	8.97822	-0.0962402	6.30193	-0.606876	NUFIP2	1082.51	1121.64	981.202	688.718
EGFL7	-1.34035	0.460603	1.34035	0.460603	EGFL7	EGFL7	51162	EGF-like-domain, multiple 7	EGFL7	-0.504464	0.428472	-0.455188	-0.466017	EGFL7	30.4811	32.0883	-0.0379958	22.7412	22.7414	-0.460602	EGFL7	22.0602	-0.504464	42.1164	0.428472	22.8267	-0.455188	22.656	-0.466017	EGFL7	247.116	471.784	255.702	253.79
PSEN1	-1.34023	0.242787	1.34023	0.242787	PSEN1	PSEN1	5663	presenilin 1	PSEN1	-0.0550773	0.133302	-0.143507	-0.623223	PSEN1	22.3874	22.4352	0.0391121	16.7042	16.9356	-0.383365	PSEN1	20.9725	-0.0550773	23.8978	0.133302	19.7256	-0.143507	14.1456	-0.623223	PSEN1	1261.59	1437.87	1186.63	851.94
ZNF592	-1.33997	0.15495	1.33997	0.15495	ZNF592	ZNF592	9640	zinc finger protein 592	ZNF592	0.338733	0.0218873	-0.139013	-0.344759	ZNF592	4.49163	4.51874	0.18031	3.35205	3.36058	-0.241886	ZNF592	5.01296	0.338733	4.02452	0.0218873	3.5998	-0.139013	3.12135	-0.344759	ZNF592	409.192	328.509	293.84	254.786
LOC100216545	-1.33995	0.617099	1.33995	0.617099	LOC100216545	LOC100216545	100216545	uncharacterized LOC100216545	LOC100216545	0.81262	-0.100542	0.49087	-0.623153	LOC100216545	3.841	4.03496	0.356039	2.86652	3.08284	-0.0661419	LOC100216545	5.27095	0.81262	2.79898	-0.100542	4.21728	0.49087	1.9484	-0.623153	LOC100216545	183.086	97.2223	146.487	67.6774
FOXA1	-1.33992	0.179099	1.33992	0.179099	FOXA1	FOXA1	3169	forkhead box A1	FOXA1	-0.220793	0.120013	-0.591222	-0.35386	FOXA1	3.18254	3.20477	-0.05039	2.37517	2.38321	-0.472541	FOXA1	2.82799	-0.220793	3.58155	0.120013	2.1876	-0.591222	2.57882	-0.35386	FOXA1	84.0395	106.433	65.009	76.6348
SLC19A2	-1.33987	0.171898	1.33987	0.171898	SLC19A2	SLC19A2	10560	solute carrier family 19 (thiamine transporter), member 2	SLC19A2	0.0555381	0.351255	-0.0810032	-0.35639	SLC19A2	5.68375	5.71363	0.203397	4.24201	4.26135	-0.218696	SLC19A2	5.13009	0.0555381	6.29716	0.351255	4.66683	-0.0810032	3.85587	-0.35639	SLC19A2	180.085	221.053	163.823	135.355
MDN1	-1.3396	0.168561	1.3396	0.168561	MDN1	MDN1	23195	MDN1, midasin homolog (yeast)	MDN1	0.100839	0.212475	-0.45648	-0.0738054	MDN1	1.8902	1.89161	0.156657	1.41102	1.42345	-0.265143	MDN1	1.81846	0.100839	1.96476	0.212475	1.23576	-0.45648	1.61113	-0.0738054	MDN1	320.151	345.907	217.563	283.648
MBOAT1	-1.33952	0.407515	1.33952	0.407515	MBOAT1	MBOAT1	154141	membrane bound O-acyltransferase domain containing 1	MBOAT1	0.0316817	0.69572	0.174695	-0.29073	MBOAT1	2.04503	2.09942	0.363701	1.52669	1.54659	-0.0580177	MBOAT1	1.62462	0.0316817	2.57423	0.69572	1.79392	0.174695	1.29926	-0.29073	MBOAT1	51.024	80.848	56.3411	40.8055
BUB1	-1.33943	0.724271	1.33943	0.724271	BUB1	BUB1	699	budding uninhibited by benzimidazoles 1 homolog (yeast)	BUB1	-0.821692	0.987158	-0.850932	0.173169	BUB1	83.4427	100.383	0.0827329	62.2974	66.2626	-0.338882	BUB1	44.5789	-0.821692	156.188	0.987158	43.6845	-0.850932	88.8408	0.173169	BUB1	1503.71	5268.43	1473.54	2996.72
DPY19L2P3	-1.33926	0.523764	1.33926	0.523764	DPY19L2P3	DPY19L2P3	442524	dpy-19-like 2 pseudogene 3 (C. elegans)	DPY19L2P3	0.123628	0.752608	0.468169	-0.434801	DPY19L2P3	1.05975	1.08503	0.438118	0.791299	0.830364	0.0166844	DPY19L2P3	0.852185	0.123628	1.31788	0.752608	1.08206	0.468169	0.578669	-0.434801	DPY19L2P3	12.0056	18.9945	13.7319	7.96205
PRPF39	-1.33914	0.326738	1.33914	0.326738	PRPF39	PRPF39	55015	PRP39 pre-mRNA processing factor 39 homolog (S. cerevisiae)	PRPF39	0.211311	-0.100119	-0.0779672	-0.653461	PRPF39	23.7726	23.9113	0.0555959	17.7521	18.1064	-0.365714	PRPF39	26.4821	0.211311	21.3404	-0.100119	21.6706	-0.0779672	14.5422	-0.653461	PRPF39	721.339	581.287	590.281	396.112
CRTC1	-1.33897	0.527107	1.33897	0.527107	CRTC1	CRTC1	23373	CREB regulated transcription coactivator 1	CRTC1	0.543004	0.16062	0.451545	-0.59017	CRTC1	0.30487	0.307551	0.351812	0.22769	0.242691	-0.0693125	CRTC1	0.348072	0.543004	0.26703	0.16062	0.326691	0.451545	0.15869	-0.59017	CRTC1	24.0113	18.4211	22.5364	10.9478
PTPN4	-1.33859	0.396411	1.33859	0.396411	PTPN4	PTPN4	5775	protein tyrosine phosphatase, non-receptor type 4 (megakaryocyte)	PTPN4	-0.408161	0.365256	-0.511987	-0.372345	PTPN4	15.6973	16.2645	-0.0214529	11.7267	11.7404	-0.442166	PTPN4	12.0064	-0.408161	20.5227	0.365256	11.1727	-0.511987	12.3082	-0.372345	PTPN4	459.216	784.942	427.326	470.756
C10orf28	-1.33854	0.201535	1.33854	0.201535	C10orf28	R3HCC1L	27291	R3H domain and coiled-coil containing 1-like	C10orf28	0.061461	0.361837	-0.375576	-0.0424447	C10orf28	14.6312	14.7106	0.211649	10.9308	11.0037	-0.20901	C10orf28	13.1847	0.061461	16.2365	0.361837	9.73888	-0.375576	12.2685	-0.0424447	C10orf28	427.201	525.001	315.51	386.16
WDSUB1	-1.33837	0.54197	1.33837	0.54197	WDSUB1	WDSUB1	151525	WD repeat, sterile alpha motif and U-box domain containing 1	WDSUB1	0.44218	-0.000277718	0.333418	-0.732464	WDSUB1	13.1634	13.3185	0.220951	9.8354	10.5141	-0.199523	WDSUB1	15.3449	0.44218	11.292	-0.000277718	14.2306	0.333418	6.79768	-0.732464	WDSUB1	256.12	188.304	234.899	113.459
PBLD	-1.33821	0.709472	1.33821	0.709472	PBLD	PBLD	64081	phenazine biosynthesis-like protein domain containing	PBLD	0.886001	-0.292358	0.658186	-0.905156	PBLD	3.66551	3.97545	0.296821	2.73911	3.15109	-0.123485	PBLD	5.51436	0.886001	2.43654	-0.292358	4.70886	0.658186	1.59332	-0.905156	PBLD	131.062	59.3568	111.815	38.815
CCNT2	-1.33821	0.349445	1.33821	0.349445	CCNT2	CCNT2	905	cyclin T2	CCNT2	-0.117953	0.0662018	-0.111669	-0.780684	CCNT2	9.94067	9.96092	-0.0258756	7.42835	7.62893	-0.446177	CCNT2	9.32605	-0.117953	10.5958	0.0662018	9.36676	-0.111669	5.89109	-0.780684	CCNT2	641.302	723.539	644.022	405.069
CALCOCO1	-1.33805	0.626435	1.33805	0.626435	CALCOCO1	CALCOCO1	57658	calcium binding and coiled-coil domain 1	CALCOCO1	0.604823	-0.0321775	0.531574	-0.799202	CALCOCO1	22.7475	23.3041	0.286323	17.0004	18.8408	-0.133814	CALCOCO1	28.3669	0.604823	18.2413	-0.0321775	26.9626	0.531574	10.7191	-0.799202	CALCOCO1	824.388	530.118	783.575	311.515
LOC100505783	-1.33776	0.245763	1.33776	0.245763	LOC100505783	LOC100505783	100505783	uncharacterized LOC100505783	LOC100505783	0.268975	0.377272	0.155997	-0.349389	LOC100505783	18.3396	18.3525	0.323123	13.7092	13.92	-0.096696	LOC100505783	17.664	0.268975	19.041	0.377272	16.3335	0.155997	11.5065	-0.349389	LOC100505783	251.118	270.176	231.432	161.232
SEMA6C	-1.33751	0.632742	1.33751	0.632742	SEMA6C	SEMA6C	10500	sema domain, transmembrane domain (TM), and cytoplasmic domain, (semaphorin) 6C	SEMA6C	0.0983784	-0.0817755	0.334671	-1.15717	SEMA6C	0.944161	0.946002	0.00830142	0.705908	0.802382	-0.41125	SEMA6C	1.00499	0.0983784	0.887013	-0.0817755	1.18384	0.334671	0.420924	-1.15717	SEMA6C	38.0179	33.772	45.0729	15.9241
CDKL3	-1.33734	0.506781	1.33734	0.506781	CDKL3	CDKL3	51265	cyclin-dependent kinase-like 3	CDKL3	0.44116	0.138789	0.371291	-0.630067	CDKL3	3.30426	3.32242	0.289975	2.47078	2.62107	-0.129388	CDKL3	3.66932	0.44116	2.97552	0.138789	3.49585	0.371291	1.74628	-0.630067	CDKL3	56.0263	45.0293	52.874	25.8767
ATRN	-1.33707	0.369775	1.33707	0.369775	ATRN	ATRN	8455	attractin	ATRN	0.39536	-0.0229045	0.0663826	-0.532081	ATRN	14.3004	14.451	0.186228	10.6953	10.9262	-0.232849	ATRN	16.5312	0.39536	12.3707	-0.0229045	13.1605	0.0663826	8.69194	-0.532081	ATRN	635.299	497.369	510.537	351.326
SEPT10	-1.33703	0.354896	1.33703	0.354896	SEPT10				SEPT10	-0.104067	0.571495	-0.0900797	-0.280547	SEPT10	66.8859	68.7276	0.233714	50.0259	50.135	-0.185313	SEPT10	52.924	-0.104067	84.5312	0.571495	53.4396	-0.0900797	46.8303	-0.280547	SEPT10	1650.78	2626.03	1666.83	1456.06
MAPKAP1	-1.33694	0.587578	1.33694	0.587578	MAPKAP1	MAPKAP1	79109	mitogen-activated protein kinase associated protein 1	MAPKAP1	-0.610731	0.697935	-0.371309	-0.379362	MAPKAP1	50.1803	55.4305	0.0436021	37.5336	37.5338	-0.375335	MAPKAP1	31.883	-0.610731	78.9781	0.697935	37.6385	-0.371309	37.429	-0.379362	MAPKAP1	887.417	1911.7	1024.54	979.332
C9orf103	-1.33652	0.451265	1.33652	0.451265	C9orf103	IDNK	414328	idnK, gluconokinase homolog (E. coli)	C9orf103	-0.011891	0.886493	0.0570658	-0.0194212	C9orf103	16.4699	17.2747	0.437301	12.323	12.3273	0.0188223	C9orf103	12.0634	-0.011891	22.4859	0.886493	12.654	0.0570658	12.0006	-0.0194212	C9orf103	90.0423	167.836	95.3465	89.5731
SLC2A8	-1.3359	0.294989	1.3359	0.294989	SLC2A8	SLC2A8	29988	solute carrier family 2 (facilitated glucose transporter), member 8	SLC2A8	-0.367138	0.220672	-0.446957	-0.53514	SLC2A8	14.3133	14.6113	-0.073233	10.7143	10.7193	-0.491048	SLC2A8	11.6752	-0.367138	17.5474	0.220672	11.0468	-0.446957	10.3918	-0.53514	SLC2A8	228.107	342.837	215.83	203.032
TNFRSF10B	-1.33576	0.508969	1.33576	0.508969	TNFRSF10B	TNFRSF10B	8795	tumor necrosis factor receptor superfamily, member 10b	TNFRSF10B	0.205126	-0.0349417	0.177446	-0.842589	TNFRSF10B	44.5621	44.7164	0.0850923	33.3608	35.4672	-0.332571	TNFRSF10B	48.4283	0.205126	41.0045	-0.0349417	47.508	0.177446	23.4264	-0.842589	TNFRSF10B	1937.91	1636.41	1902.6	939.522
DOCK5	-1.33555	0.15451	1.33555	0.15451	DOCK5	DOCK5	80005	dedicator of cytokinesis 5	DOCK5	0.00268333	-0.31791	-0.67022	-0.479873	DOCK5	2.62974	2.64599	-0.157613	1.96903	1.97332	-0.575046	DOCK5	2.93878	0.00268333	2.3532	-0.31791	1.84333	-0.67022	2.10331	-0.479873	DOCK5	221.104	177.047	138.686	158.246
NEIL1	-1.33528	0.809555	1.33528	0.809555	NEIL1	NEIL1	79661	nei endonuclease VIII-like 1 (E. coli)	NEIL1	0.490769	-0.861144	0.759634	-1.9643	NEIL1	1.65551	1.84057	-0.185188	1.23982	1.83456	-0.602334	NEIL1	2.64493	0.490769	1.03621	-0.861144	3.18677	0.759634	0.482352	-1.9643	NEIL1	44.0207	17.3977	53.7407	7.96205
YBEY	-1.33501	0.604882	1.33501	0.604882	YBEY	YBEY	54059	ybeY metallopeptidase (putative)	YBEY	-0.374276	0.947295	-0.311967	0.0512913	YBEY	9.06478	10.0323	0.28651	6.79006	6.84394	-0.130338	YBEY	5.73378	-0.374276	14.3309	0.947295	5.98684	-0.311967	7.70104	0.0512913	YBEY	50.0235	127.924	53.7407	68.6727
LOC100499183	-1.33429	0.750572	1.33429	0.750572	LOC100499183	LOC100499183	100499183	uncharacterized LOC100499183	LOC100499183	-0.0148932	0.602767	-1.22183	0.977565	LOC100499183	0.308375	0.315468	0.293937	0.231116	0.301573	-0.122133	LOC100499183	0.24895	-0.0148932	0.381985	0.602767	0.107842	-1.22183	0.495304	0.977565	LOC100499183	2.00094	3.07022	0.866786	3.98103
DHDH	-1.33428	0.61176	1.33428	0.61176	DHDH	DHDH	27294	dihydrodiol dehydrogenase (dimeric)	DHDH	0.651775	-0.73058	-0.555157	-0.355763	DHDH	0.554567	0.619437	-0.0394026	0.415631	0.416624	-0.45546	DHDH	0.895404	0.651775	0.34347	-0.73058	0.387879	-0.555157	0.445369	-0.355763	DHDH	8.00376	3.07018	3.46714	3.98103
SBF1P1	-1.33428	0.717473	1.33428	0.717473	SBF1P1	SBF1P1	100133234	SET binding factor 1 pseudogene 1	SBF1P1	-1.14659	0.792976	-0.353523	-0.832205	SBF1P1	0.258708	0.319392	-0.176807	0.193894	0.196568	-0.592864	SBF1P1	0.132092	-1.14659	0.506692	0.792976	0.228883	-0.353523	0.164254	-0.832205	SBF1P1	8.00376	30.7018	13.8686	9.95257
SPATA25	-1.33428	0.447311	1.33428	0.447311	SPATA25	SPATA25	128497	spermatogenesis associated 25	SPATA25	0.915935	0.53358	0.709004	-0.0916024	SPATA25	0.670007	0.675899	0.724757	0.502151	0.521605	0.308701	SPATA25	0.764944	0.915935	0.586853	0.53358	0.662731	0.709004	0.380479	-0.0916024	SPATA25	4.00188	3.07018	3.46714	1.99051
RASIP1	-1.33427	0.597584	1.33427	0.597584	RASIP1	RASIP1	54922	Ras interacting protein 1	RASIP1	-0.519751	0.612468	-0.726683	-0.0127122	RASIP1	0.327257	0.352776	0.0463583	0.245269	0.252816	-0.369698	RASIP1	0.221041	-0.519751	0.484512	0.612468	0.191505	-0.726683	0.314128	-0.0127122	RASIP1	7.00329	15.3509	6.0675	9.95257
FBXO48	-1.33427	0.602053	1.33427	0.602053	FBXO48	FBXO48	554251	F-box protein 48	FBXO48	-0.0691941	0.437418	-0.861087	0.397202	FBXO48	1.67425	1.70013	0.184112	1.2548	1.37602	-0.231942	FBXO48	1.40465	-0.0691941	1.9956	0.437418	0.811306	-0.861087	1.94074	0.397202	FBXO48	36.0169	51.1697	20.8029	49.7628
APOA1	-1.33427	0.719546	1.33427	0.719546	APOA1	APOA1	335	apolipoprotein A-I	APOA1	-0.848229	0.769418	-1.05516	0.144239	APOA1	0.24844	0.288517	-0.0394055	0.186199	0.202518	-0.455458	APOA1	0.141821	-0.848229	0.435212	0.769418	0.122871	-1.05516	0.282165	0.144239	APOA1	1.00047	3.07018	0.866786	1.99051
IDI2	-1.33427	0.57657	1.33427	0.57657	IDI2	IDI2	91734	isopentenyl-diphosphate delta isomerase 2	IDI2	0.132527	-0.249826	-1.07439	0.12499	IDI2	0.594834	0.600065	-0.0586493	0.445813	0.484885	-0.4747	IDI2	0.679119	0.132527	0.52101	-0.249826	0.29419	-1.07439	0.67558	0.12499	IDI2	8.00384	6.14043	3.46721	7.96213
RGL3	-1.33415	0.673953	1.33415	0.673953	RGL3	RGL3	57139	ral guanine nucleotide dissociation stimulator-like 3	RGL3	0.430837	-0.0535519	0.590327	-1.04488	RGL3	5.87238	5.95532	0.188642	4.4016	5.12755	-0.227274	RGL3	6.94579	0.430837	4.96485	-0.0535519	7.7577	0.590327	2.4974	-1.04488	RGL3	166.078	118.714	185.492	59.7154
ZNF323	-1.33395	0.680977	1.33395	0.680977	ZNF323	ZNF323	64288	zinc finger protein 323	ZNF323	0.551078	-0.210563	0.54039	-1.03128	ZNF323	4.36632	4.51933	0.170257	3.27324	3.77094	-0.245444	ZNF323	5.68531	0.551078	3.35334	-0.210563	5.64335	0.54039	1.89853	-1.03128	ZNF323	142.067	84.9416	149.954	50.7581
ERMAP	-1.33392	0.243176	1.33392	0.243176	ERMAP	ERMAP	114625	erythroblast membrane-associated protein (Scianna blood group)	ERMAP	-0.0203321	0.291905	-0.480037	-0.0797266	ERMAP	1.93969	1.95106	0.135786	1.45413	1.46815	-0.279882	ERMAP	1.74075	-0.0203321	2.16137	0.291905	1.26576	-0.480037	1.67054	-0.0797266	ERMAP	56.0263	70.6141	40.7389	54.7391
FBXL20	-1.33385	0.380666	1.33385	0.380666	FBXL20	FBXL20	84961	F-box and leucine-rich repeat protein 20	FBXL20	0.158203	0.180131	0.125949	-0.618803	FBXL20	3.90945	3.90956	0.169167	2.93095	3.02913	-0.246427	FBXL20	3.87985	0.158203	3.93927	0.180131	3.79407	0.125949	2.26419	-0.618803	FBXL20	404.19	410.381	395.254	235.876
NAIF1	-1.3336	0.00996715	1.3336	0.00996715	NAIF1	NAIF1	203245	nuclear apoptosis inducing factor 1	NAIF1	0.294741	0.235791	-0.179672	-0.120457	NAIF1	3.90099	3.9018	0.265266	2.92515	2.92577	-0.150064	NAIF1	3.98151	0.294741	3.8221	0.235791	2.86573	-0.179672	2.9858	-0.120457	NAIF1	130.061	124.854	93.6129	97.5351
NFAT5	-1.33292	0.398694	1.33292	0.398694	NFAT5	NFAT5	10725	nuclear factor of activated T-cells 5, tonicity-responsive	NFAT5	0.623763	0.205129	0.328394	-0.328688	NFAT5	20.3692	20.584	0.414446	15.2816	15.6796	-0.000146985	NFAT5	23.5497	0.623763	17.6183	0.205129	19.1898	0.328394	12.1694	-0.328688	NFAT5	1880.88	1467.55	1705.84	1010.19
LARGE	-1.3327	0.388224	1.3327	0.388224	LARGE	LARGE	9215	like-glycosyltransferase	LARGE	-0.0209838	-0.074715	-0.0843147	-0.840082	LARGE	2.09849	2.09885	-0.0478494	1.57462	1.62894	-0.462199	LARGE	2.13793	-0.0209838	2.05977	-0.074715	2.04611	-0.0843147	1.21177	-0.840082	LARGE	86.0405	82.8948	82.3447	48.7676
CERCAM	-1.33235	0.388728	1.33235	0.388728	CERCAM	CERCAM	51148	cerebral endothelial cell adhesion molecule	CERCAM	-0.267633	0.343781	-0.151894	-0.599905	CERCAM	18.837	19.2615	0.0380739	14.1382	14.3089	-0.375899	CERCAM	15.24	-0.267633	23.283	0.343781	16.513	-0.151894	12.1049	-0.599905	CERCAM	387.182	591.521	419.524	307.534
ESCO1	-1.3322	0.164966	1.3322	0.164966	ESCO1	ESCO1	114799	establishment of cohesion 1 homolog 1 (S. cerevisiae)	ESCO1	-0.0447966	0.231472	-0.185974	-0.454969	ESCO1	9.67168	9.71604	0.0933378	7.25994	7.29151	-0.320471	ESCO1	8.78859	-0.0447966	10.6435	0.231472	7.96931	-0.185974	6.61371	-0.454969	ESCO1	386.182	467.691	350.182	290.615
MON1B	-1.33219	0.0155981	1.33219	0.0155981	MON1B	MON1B	22879	MON1 homolog B (yeast)	MON1B	0.382404	0.459635	0.0424819	-0.0280461	MON1B	26.8011	26.8107	0.421019	20.1181	20.1241	0.00721788	MON1B	26.0933	0.382404	27.5282	0.459635	20.6159	0.0424819	19.6323	-0.0280461	MON1B	829.39	875.001	655.29	624.026
RB1CC1	-1.33204	0.276657	1.33204	0.276657	RB1CC1	RB1CC1	9821	RB1-inducible coiled-coil 1	RB1CC1	-0.266047	0.230482	-0.303678	-0.55916	RB1CC1	31.7583	32.2297	-0.0177828	23.8419	23.9354	-0.431419	RB1CC1	26.7376	-0.266047	37.7218	0.230482	26.0492	-0.303678	21.8216	-0.55916	RB1CC1	1766.83	2491.96	1720.57	1442.13
ZNF391	-1.33189	0.129766	1.33189	0.129766	ZNF391	ZNF391	346157	zinc finger protein 391	ZNF391	-0.0182395	-0.184863	-0.372014	-0.658047	ZNF391	2.05973	2.06317	-0.101551	1.54647	1.55408	-0.515031	ZNF391	2.18218	-0.0182395	1.94416	-0.184863	1.70763	-0.372014	1.40052	-0.658047	ZNF391	31.0146	27.6316	24.27	19.9051
SAP130	-1.33184	0.360175	1.33184	0.360175	SAP130	SAP130	79595	Sin3A-associated protein, 130kDa	SAP130	-0.366413	0.324192	-0.370806	-0.498259	SAP130	16.5055	16.9806	-0.0211104	12.393	12.4051	-0.434532	SAP130	12.9922	-0.366413	20.9689	0.324192	12.9527	-0.370806	11.8575	-0.498259	SAP130	522.246	838.159	520.938	477.723
VILL	-1.33182	0.456543	1.33182	0.456543	VILL	VILL	50853	villin-like	VILL	0.838893	0.50562	0.678503	-0.160785	VILL	6.17642	6.21766	0.672257	4.63758	4.83516	0.258859	VILL	6.93265	0.838893	5.50268	0.50562	6.20322	0.678503	3.4671	-0.160785	VILL	183.086	145.322	163.823	91.5636
LOC100288846	-1.33138	0.757085	1.33138	0.757085	LOC100288846	LOC100288846	100288846	uncharacterized LOC100288846	LOC100288846	0.229949	1.13713	1.34476	-0.803533	LOC100288846	1.39499	1.4645	0.683542	1.04777	1.35185	0.270615	LOC100288846	1.01865	0.229949	1.91036	1.13713	2.20606	1.34476	0.497641	-0.803533	LOC100288846	12.0054	22.5147	25.9998	5.86501
MAFK	-1.33117	0.481553	1.33117	0.481553	MAFK	MAFK	7975	v-maf musculoaponeurotic fibrosarcoma oncogene homolog K (avian)	MAFK	0.386285	-0.384928	-0.123963	-0.700073	MAFK	1.68183	1.74226	0.000678301	1.26342	1.28869	-0.412018	MAFK	2.19716	0.386285	1.28737	-0.384928	1.54263	-0.123963	1.03475	-0.700073	MAFK	70.6932	41.4207	49.6336	33.2929
GARNL3	-1.33101	0.510311	1.33101	0.510311	GARNL3	GARNL3	84253	GTPase activating Rap/RanGAP domain-like 3	GARNL3	-0.164518	-0.0216579	0.00882529	-1.02005	GARNL3	1.83215	1.8344	-0.0930881	1.37651	1.46495	-0.505614	GARNL3	1.74365	-0.164518	1.92515	-0.0216579	1.96626	0.00882529	0.963646	-1.02005	GARNL3	63.0296	69.5907	71.0765	34.834
SLC7A6OS	-1.3309	0.0425361	1.3309	0.0425361	SLC7A6OS	SLC7A6OS	84138	solute carrier family 7, member 6 opposite strand	SLC7A6OS	0.253825	0.402584	-0.0373899	-0.131014	SLC7A6OS	14.5748	14.5942	0.328204	10.951	10.9568	-0.0842022	SLC7A6OS	13.8424	0.253825	15.3459	0.402584	11.3122	-0.0373899	10.6014	-0.131014	SLC7A6OS	201.415	223.292	164.599	154.256
SLC27A2	-1.33082	0.815518	1.33082	0.815518	SLC27A2	SLC27A2	11001	solute carrier family 27 (fatty acid transporter), member 2	SLC27A2	2.04272	-0.594445	1.13277	-0.509138	SLC27A2	1.25607	1.81825	0.724137	0.943832	1.10081	0.311818	SLC27A2	3.13291	2.04272	0.503596	-0.594445	1.66735	1.13277	0.534272	-0.509138	SLC27A2	70.0329	11.2573	37.2718	11.9431
GPR146	-1.33063	0.302618	1.33063	0.302618	GPR146	GPR146	115330	G protein-coupled receptor 146	GPR146	0.714622	0.180955	0.171641	-0.100274	GPR146	4.03672	4.10597	0.447788	3.0337	3.04718	0.0356838	GPR146	4.85684	0.714622	3.35509	0.180955	3.3335	0.171641	2.76087	-0.100274	GPR146	77.0362	53.2164	52.874	43.7913
PLD6	-1.33058	0.615307	1.33058	0.615307	PLD6	PLD6	201164	phospholipase D family, member 6	PLD6	0.369704	-0.0994352	0.381669	-0.935511	PLD6	6.20436	6.28655	0.135134	4.66289	5.15724	-0.276921	PLD6	7.29977	0.369704	5.27332	-0.0994352	7.36056	0.381669	2.95393	-0.935511	PLD6	177.083	127.924	178.558	71.6585
ATF6B	-1.33056	0.643591	1.33056	0.643591	ATF6B	ATF6B	1388	activating transcription factor 6 beta	ATF6B	0.423412	0.29855	0.710172	-0.812271	ATF6B	6.76085	6.76718	0.360981	5.08122	5.80509	-0.0510496	ATF6B	7.05984	0.423412	6.47452	0.29855	8.61228	0.710172	2.9979	-0.812271	ATF6B	174.082	159.649	212.363	73.649
C11orf52	-1.33012	0.337212	1.33012	0.337212	C11orf52	C11orf52	91894	chromosome 11 open reading frame 52	C11orf52	0.839317	0.731135	0.697973	0.0493719	C11orf52	4.34219	4.34524	0.785226	3.26451	3.34734	0.373673	C11orf52	4.50808	0.839317	4.1824	0.731135	4.08736	0.697973	2.60732	0.0493719	C11orf52	43.0202	39.9123	39.0053	24.8814
ZNF461	-1.33008	0.634293	1.33008	0.634293	ZNF461	ZNF461	92283	zinc finger protein 461	ZNF461	-0.370775	0.299334	0.213196	-1.10767	ZNF461	2.60195	2.67244	-0.0357209	1.95624	2.16481	-0.447235	ZNF461	2.06271	-0.370775	3.28217	0.299334	3.09194	0.213196	1.23769	-1.10767	ZNF461	63.0296	100.293	94.4797	37.8198
ZNF202	-1.33003	0.0669812	1.33003	0.0669812	ZNF202	ZNF202	7753	zinc finger protein 202	ZNF202	0.0308459	0.14436	-0.420653	-0.227066	ZNF202	7.7925	7.79854	0.0876031	5.85888	5.87207	-0.323859	ZNF202	7.49189	0.0308459	8.10518	0.14436	5.47869	-0.420653	6.26545	-0.227066	ZNF202	295.139	319.299	215.83	246.824
KIAA0889	-1.32994	0.237779	1.32994	0.237779	KIAA0889	SOGA1	140710	suppressor of glucose, autophagy associated 1	KIAA0889	-0.0450023	-0.288723	-0.363347	-0.793106	KIAA0889	1.11775	1.12173	-0.166863	0.840447	0.849786	-0.578226	KIAA0889	1.21626	-0.0450023	1.02721	-0.288723	0.975428	-0.363347	0.724144	-0.793106	KIAA0889	78.0367	71.6375	51.1404	51.7533
CRSP8P	-1.32975	0.456269	1.32975	0.456269	CRSP8P	CRSP8P	441089	mediator complex subunit 27 pseudogene	CRSP8P	-0.293911	0.567406	-0.400531	-0.148283	CRSP8P	14.265	14.9053	0.136747	10.7276	10.7686	-0.274407	CRSP8P	10.5835	-0.293911	19.227	0.567406	9.82955	-0.400531	11.7076	-0.148283	CRSP8P	125.059	227.193	116.149	138.341
AMBP	-1.32975	0.275509	1.32975	0.275509	AMBP	AMBP	259	alpha-1-microglobulin/bikunin precursor	AMBP	0.0378118	0.414912	0.0175877	-0.387169	AMBP	163.159	164.554	0.226362	122.699	123.909	-0.184791	AMBP	143.17	0.0378118	185.939	0.414912	141.177	0.0175877	106.64	-0.387169	AMBP	1795.84	2332.31	1770.84	1337.62
DVL1	-1.32969	0.304693	1.32969	0.304693	DVL1	DVL1	1855	dishevelled, dsh homolog 1 (Drosophila)	DVL1	0.187188	0.225842	0.095273	-0.504421	DVL1	8.78625	8.78704	0.206515	6.60775	6.75098	-0.204574	DVL1	8.66933	0.187188	8.90475	0.225842	8.13423	0.095273	5.36773	-0.504421	DVL1	241.113	247.661	226.231	149.288
SET	-1.3295	0.372	1.3295	0.372	SET	SET	6418	SET nuclear oncogene	SET	-0.266814	0.443203	-0.262768	-0.382602	SET	189.424	195.188	0.0881945	142.478	142.601	-0.322685	SET	148.104	-0.266814	242.272	0.443203	148.52	-0.262768	136.682	-0.382602	SET	3653.72	6008.34	3672.57	3396.81
DDX26B	-1.32939	0.325687	1.32939	0.325687	DDX26B	DDX26B	203522	DEAD/H (Asp-Glu-Ala-Asp/His) box polypeptide 26B	DDX26B	0.138641	0.718319	0.148742	-0.113313	DDX26B	5.05315	5.15547	0.42848	3.8011	3.81678	0.0177143	DDX26B	4.13344	0.138641	6.17749	0.718319	4.16248	0.148742	3.47109	-0.113313	DDX26B	154.072	230.263	155.155	129.383
TLCD1	-1.32923	0.5834	1.32923	0.5834	TLCD1	TLCD1	116238	TLC domain containing 1	TLCD1	-0.264857	0.505995	-0.792832	0.212799	TLCD1	21.3097	22.0747	0.120569	16.0317	17.0153	-0.290016	TLCD1	16.3137	-0.264857	27.8357	0.505995	11.314	-0.792832	22.7165	0.212799	TLCD1	131.062	220.029	89.279	189.098
MOAP1	-1.32917	0.477003	1.32917	0.477003	MOAP1	MOAP1	64112	modulator of apoptosis 1	MOAP1	-0.0183197	0.204982	0.142523	-0.776911	MOAP1	42.6268	42.7545	0.093331	32.0702	33.7122	-0.317194	MOAP1	39.4523	-0.0183197	46.0567	0.204982	44.1053	0.142523	23.3192	-0.776911	MOAP1	892.42	1041.81	997.671	527.486
RBBP9	-1.32874	0.0714944	1.32874	0.0714944	RBBP9	RBBP9	10741	retinoblastoma binding protein 9	RBBP9	0.102136	0.26488	-0.309155	-0.143939	RBBP9	19.5179	19.549	0.183508	14.6891	14.7132	-0.226547	RBBP9	18.4475	0.102136	20.6504	0.26488	13.8716	-0.309155	15.5547	-0.143939	RBBP9	689.324	771.638	518.338	581.23
MID2	-1.32872	0.555032	1.32872	0.555032	MID2	MID2	11043	midline 2	MID2	-0.600676	0.15898	-0.18789	-1.07388	MID2	0.516548	0.534554	-0.220848	0.388756	0.407228	-0.630886	MID2	0.396982	-0.600676	0.672125	0.15898	0.528484	-0.18789	0.285971	-1.07388	MID2	29.0136	49.1229	38.1386	20.9004
FECH	-1.3284	0.267704	1.3284	0.267704	FECH	FECH	2235	ferrochelatase	FECH	0.0316135	0.521409	-0.0209284	-0.245437	FECH	11.9962	12.1694	0.276511	9.03053	9.05788	-0.133183	FECH	10.1233	0.0316135	14.2156	0.521409	9.76125	-0.0209284	8.35452	-0.245437	FECH	732.344	1028.51	705.564	604.121
RASAL2	-1.32825	0.343029	1.32825	0.343029	RASAL2	RASAL2	9462	RAS protein activator like 2	RASAL2	0.340334	0.267186	-0.436059	0.224525	RASAL2	2.25113	2.25185	0.30376	1.69481	1.73942	-0.105767	RASAL2	2.30893	0.340334	2.19478	0.267186	1.34801	-0.436059	2.13083	0.224525	RASAL2	244.115	235.38	143.886	232.89
FGFR1	-1.32812	0.468167	1.32812	0.468167	FGFR1	FGFR1	2260	fibroblast growth factor receptor 1	FGFR1	-0.516218	0.189175	-0.276134	-0.869682	FGFR1	12.7749	13.1586	-0.163522	9.61881	9.82305	-0.572908	FGFR1	10.0043	-0.516218	16.3129	0.189175	11.8157	-0.276134	7.83039	-0.869682	FGFR1	544.256	871.931	631.02	413.031
NQO1	-1.32808	0.334756	1.32808	0.334756	NQO1	NQO1	1728	NAD(P)H dehydrogenase, quinone 1	NQO1	0.263509	0.590381	0.298354	-0.263144	NQO1	1318.44	1326.91	0.426945	992.743	1011.6	0.0176052	NQO1	1177.23	0.263509	1476.59	0.590381	1206.01	0.298354	817.19	-0.263144	NQO1	28593.4	35862.8	29280	19843.4
PKDCC	-1.3279	0.47612	1.3279	0.47612	PKDCC	PKDCC	91461	protein kinase domain containing, cytoplasmic homolog (mouse)	PKDCC	0.399271	-0.139205	0.106614	-0.664844	PKDCC	1.83845	1.87056	0.130033	1.38448	1.43426	-0.279115	PKDCC	2.21565	0.399271	1.52547	-0.139205	1.80885	0.106614	1.05967	-0.664844	PKDCC	52.0245	35.8188	42.4725	24.8814
[truncated: 11,325 more rows]
